# Supplementary material for: Oxidative activation of dihydropyridine amides to reactive acyl donors
Source: Royal Society of Chemistry journal article supplement (doi:10.1039/c4ob01931h), 2014-10-31

Electronic Supporting Information for

**Oxidative Activation of Stable Dihydropyridine Amides to Reactive Acyl Donors**

Erik Daa Funder, Julie B. Trads, and Kurt V. Gothelf\*

Interdisciplinary Nanoscience Center and Department of Chemistry, Aarhus University, Gustav Wieds Vej 14,  
8000, Aarhus, Denmark.

\*kvg@chem.au.dk

**Table of Contents**

|                                                                                                                              |     |
|------------------------------------------------------------------------------------------------------------------------------|-----|
| Stability of DHP amide <b>1</b> towards amide bond formation (CDCl <sub>3</sub> )                                            | S2  |
| Stability of DHP amide <b>1</b> towards amide bond formation (DCM)                                                           | S18 |
| Stability of DHP amide <b>1</b> towards amide bond formation in various solvents                                             | S26 |
| Investigation of reaction intermediates by LC-MS                                                                             | S28 |
| Optimization of DDP <b>1</b> oxidation                                                                                       | S34 |
| Optimization of amide bond formation with oxidized <b>1</b>                                                                  | S35 |
| <sup>1</sup> H NMR and <sup>13</sup> C NMR spectra for all compounds, HSQC for <b>9</b> and <b>11</b> and COSY for <b>11</b> | S36 |

## Stability of DHP amide 1 towards amide bond formation (CDCl<sub>3</sub>)

To a solution of propionyl DHP (10 mg, 1 eq.) in CDCl<sub>3</sub> (0.6 mL) was phenylethyl amine (71  $\mu$ L, 1 eq.), from a 0.5 M solution in CDCl<sub>3</sub>, added. The solution was stirred in a 4 mL vial at the specified temperature and the product formation was monitored by crude <sup>1</sup>H-NMR spectroscopy directly from the crude reaction mixture.

**After 24 h at rt. < 1% product formation. (Propionyl DHP (1 eq.) and phenylethyl amine (1 eq.) in CDCl<sub>3</sub>)**

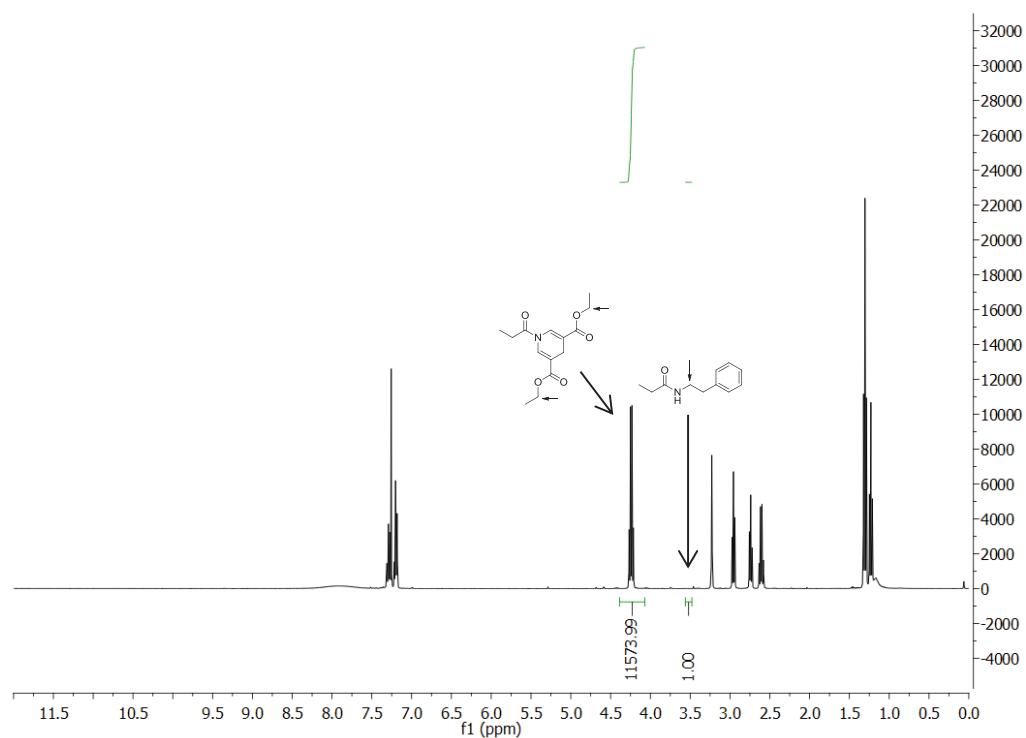

### Zoom 0-6 ppm

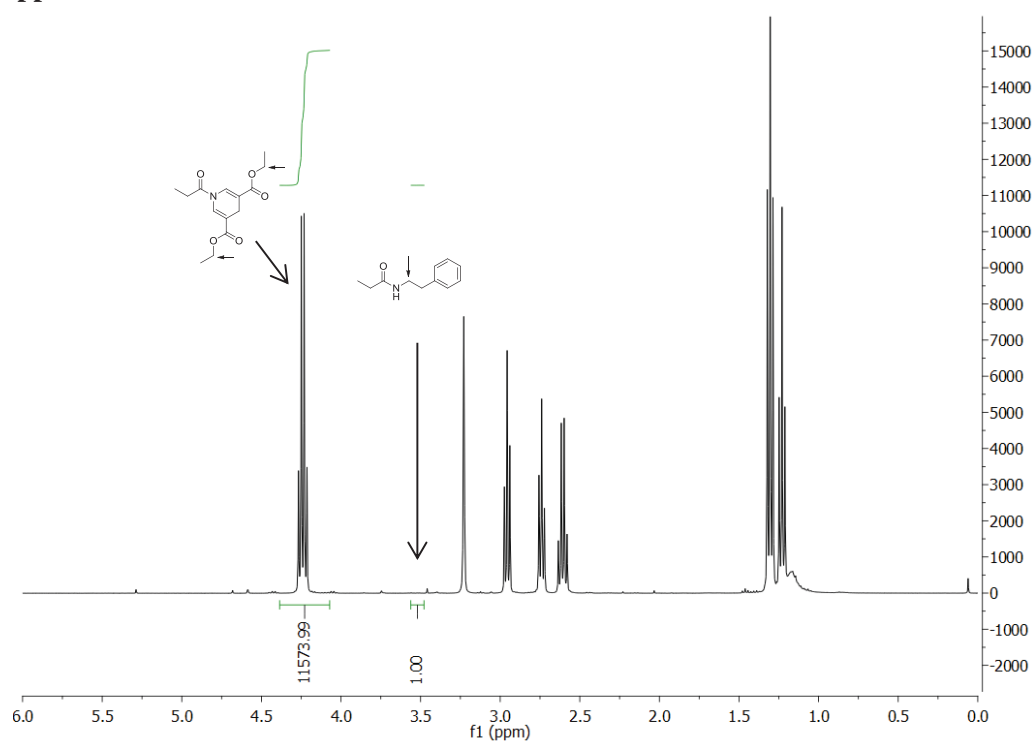

### Overlay spectra. The crude mixture (shown in blue) with overlay of the reference product (shown in red)

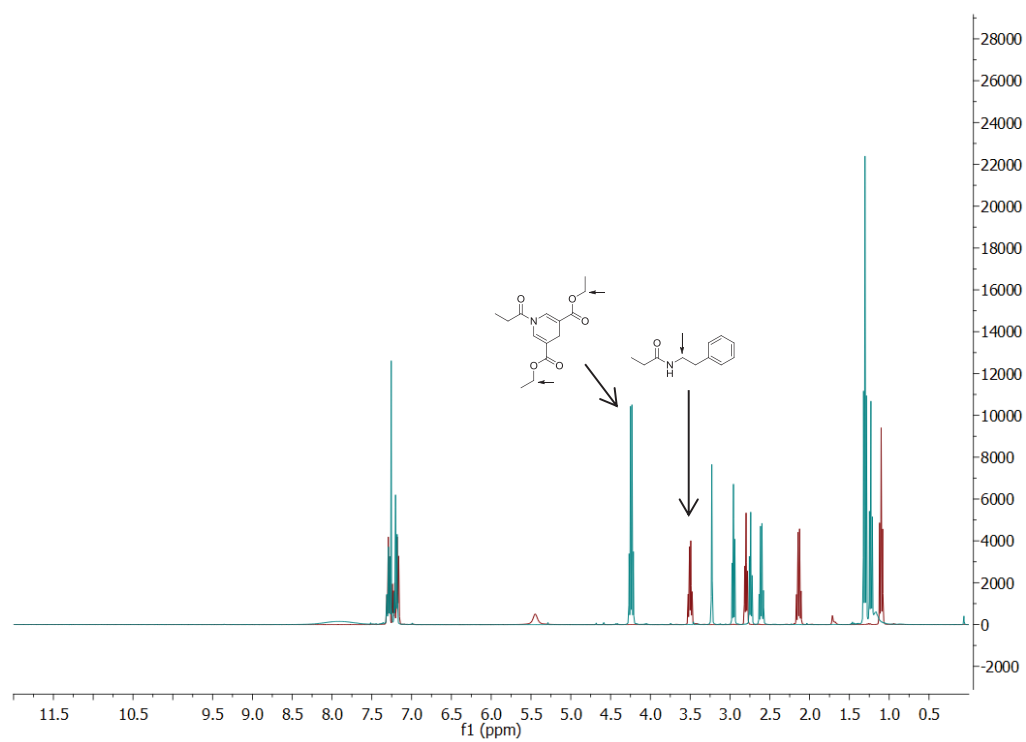

**Zoomed overlay spectra with increased intensity of peaks in the crude mixture**

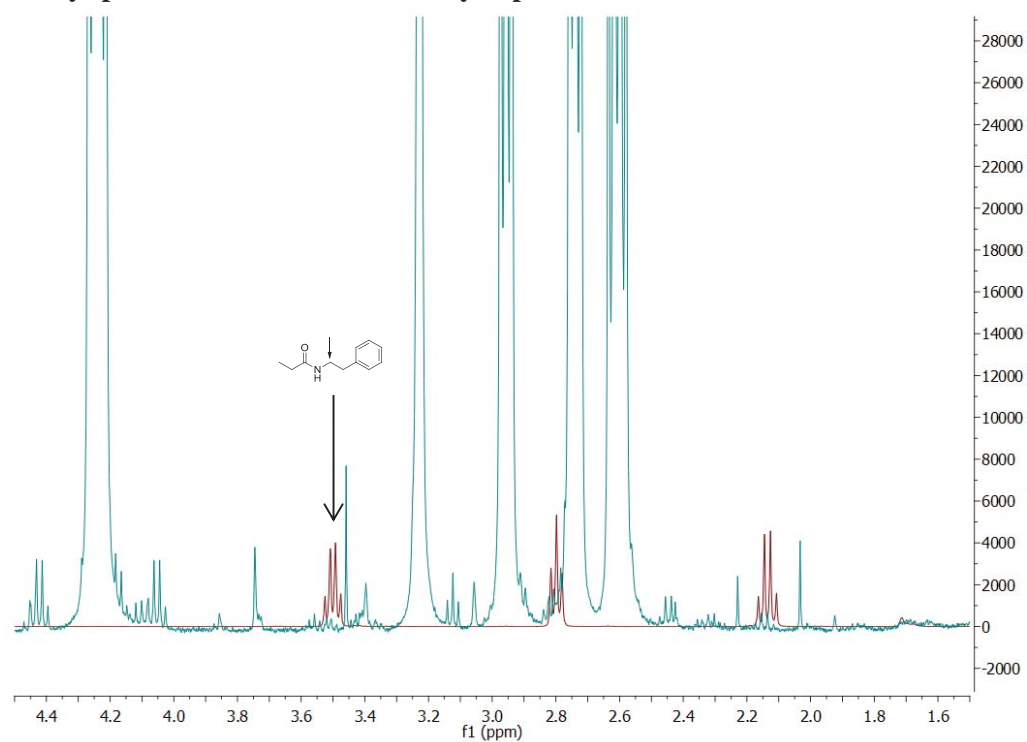

**After 48 h at rt. < 1% product formation. (Propionyl DHP (1 eq.) and phenylethyl amine (1 eq.) in  $\text{CDCl}_3$ ).**

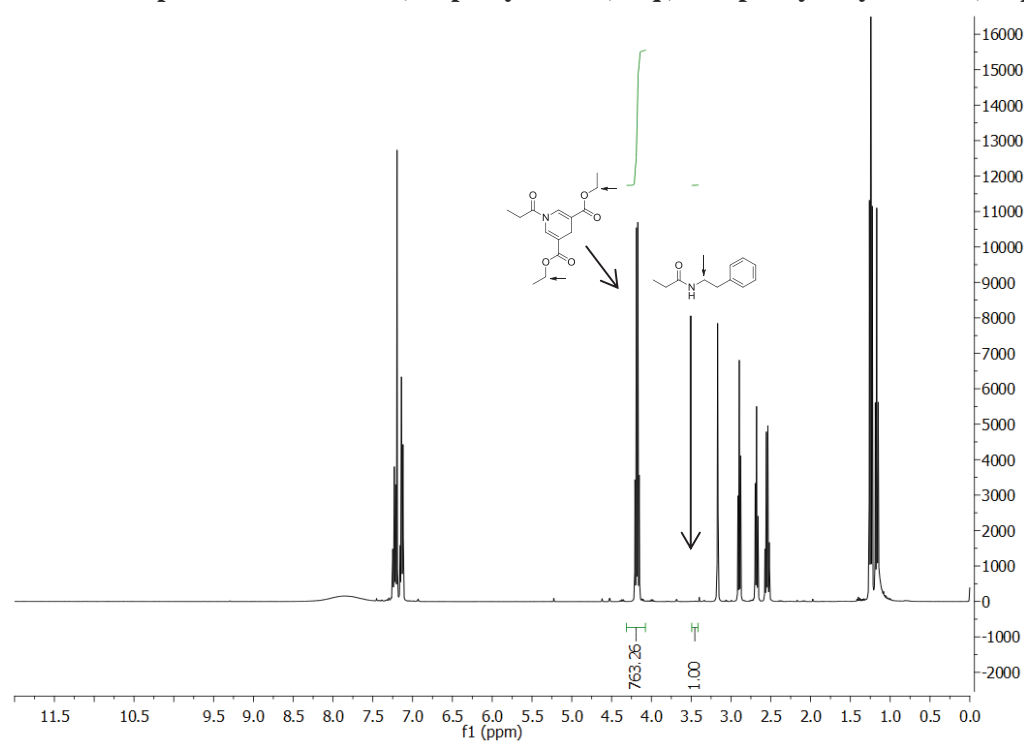

**After 48 h at rt. < 1% product formation. (Propionyl DHP (1 eq.) and phenylethyl amine (1 eq.) in CDCl<sub>3</sub>).  
Zoom 6-0 ppm**

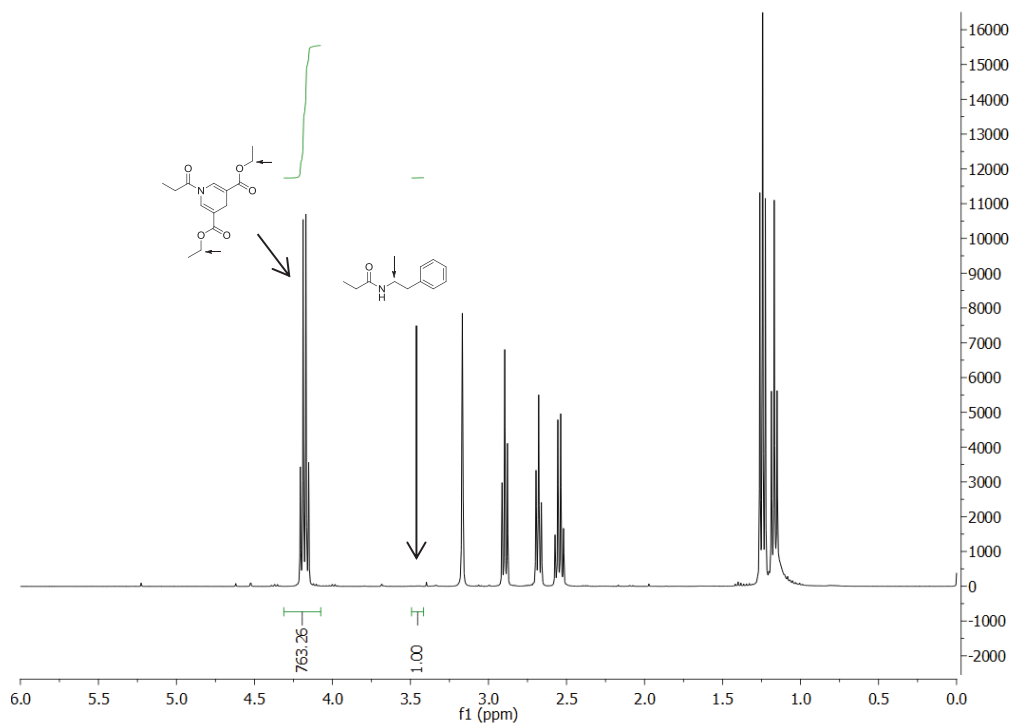

**After 24 h at 40 °C < 1% product formation. (Propionyl DHP (1 eq.) and phenylethyl amine (1 eq.) in CDCl<sub>3</sub>)**

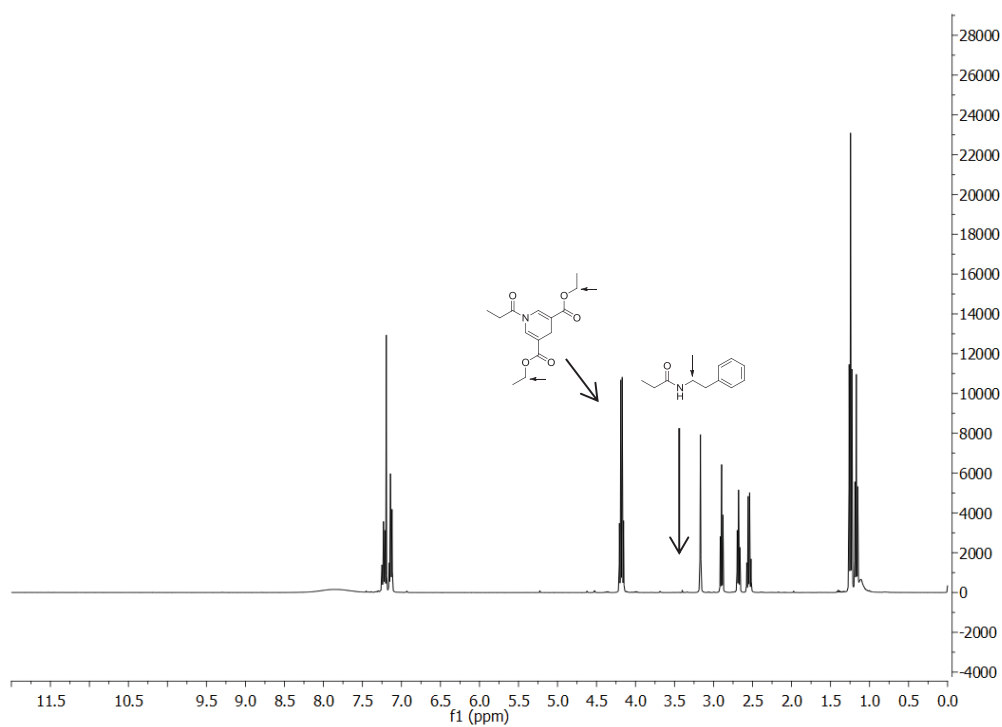

After 24 h at 40 °C < 1% product formation. (Propionyl DHP (1 eq.) and phenylethyl amine (1 eq.) in CDCl<sub>3</sub>). Zoom 6-0 ppm

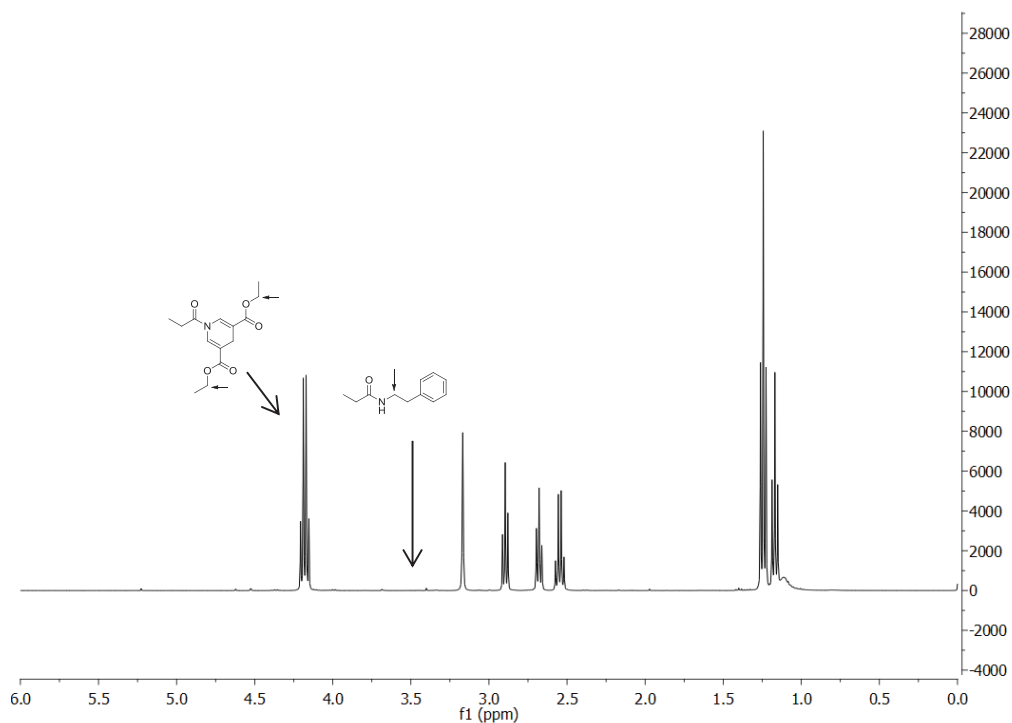

After 48 h at 40 °C < 1% product formation. (Propionyl DHP (1 eq.) and phenylethyl amine (1 eq.) in CDCl<sub>3</sub>).

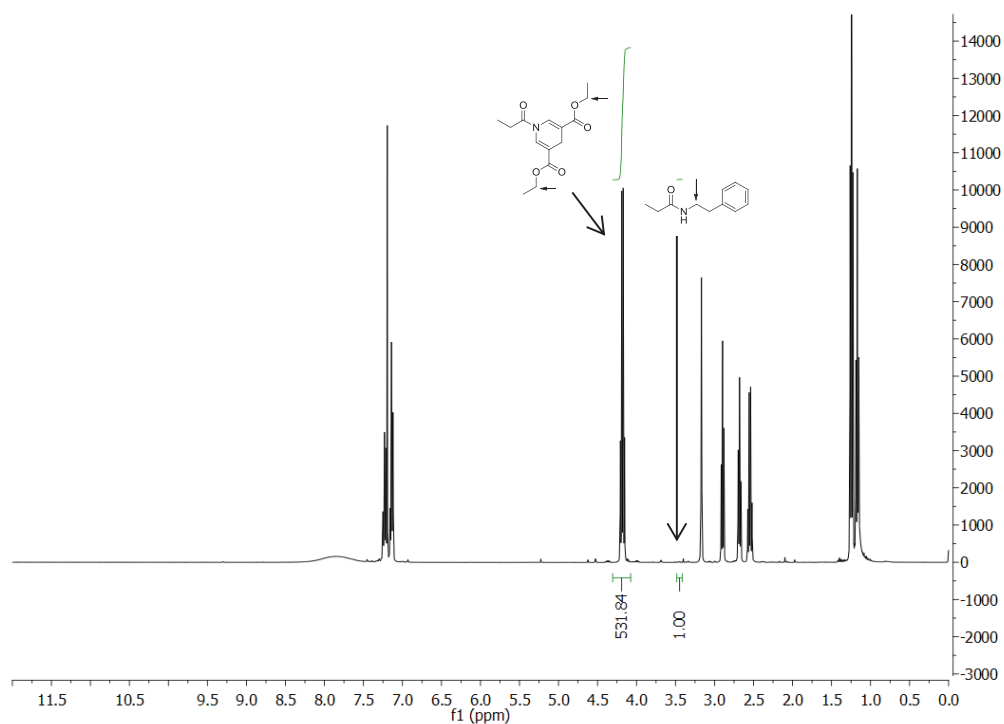

After 48 h at 40 °C < 1% product formation. (Propionyl DHP (1 eq.) and phenylethyl amine (1 eq.) in CDCl<sub>3</sub>). Zoom 6-0 ppm

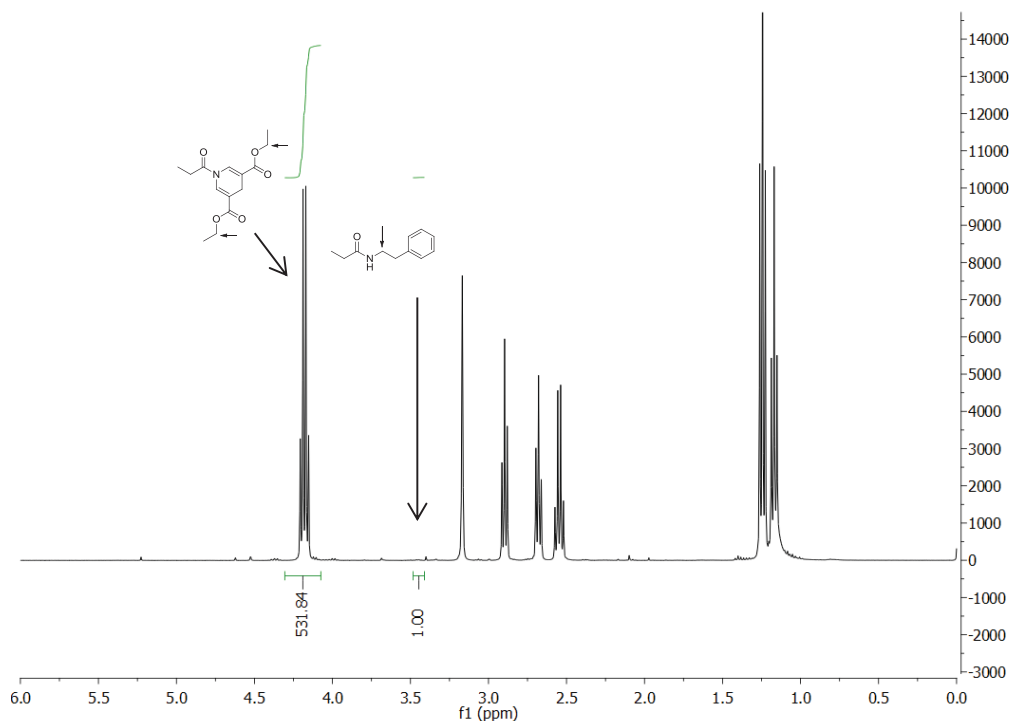

After 24 h at 60 °C < 1% product formation. (Propionyl DHP (1 eq.) and phenylethyl amine (1 eq.) in CDCl<sub>3</sub>).

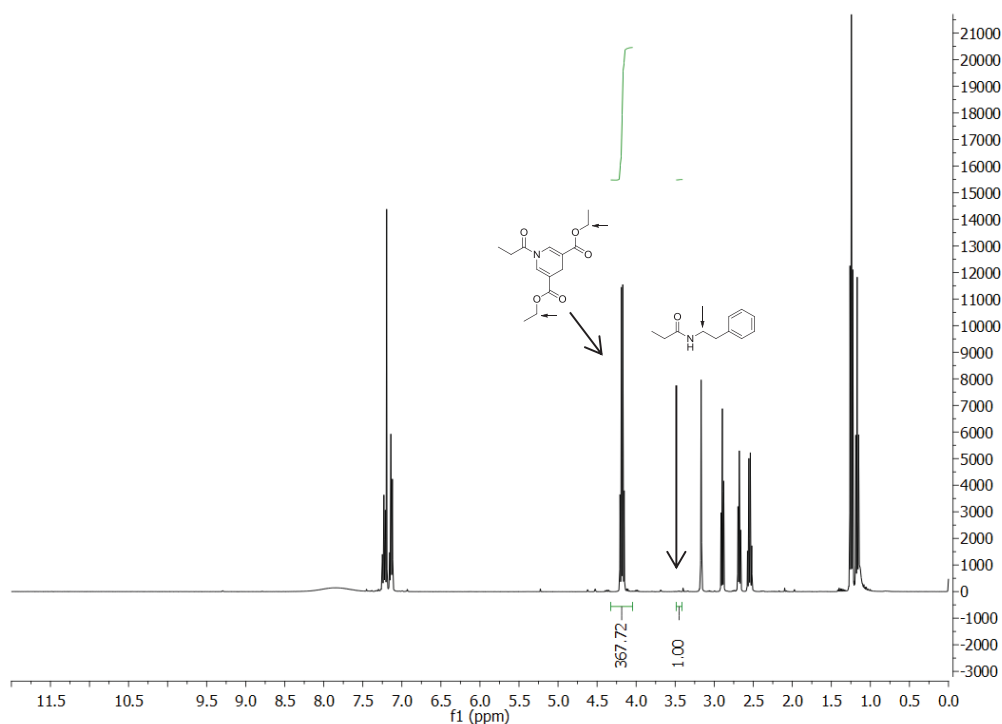

After 24 h at 60 °C < 1% product formation. (Propionyl DHP (1 eq.) and phenylethyl amine (1 eq.) in CDCl<sub>3</sub>). Zoom 6-0 ppm

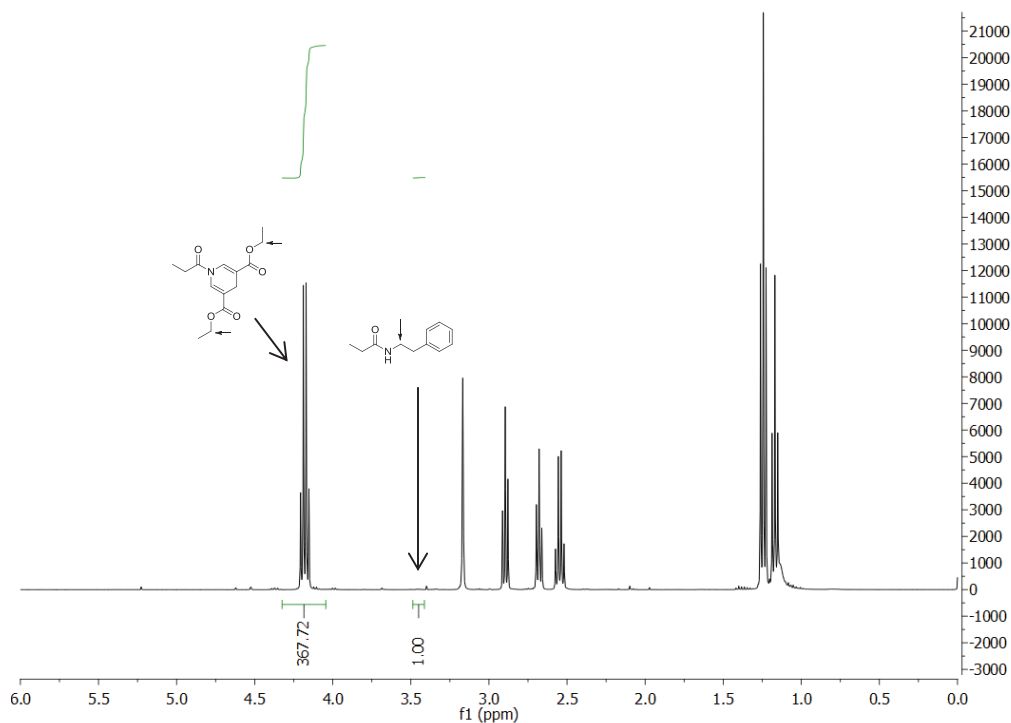

After 48 h at 60 °C < 1% product formation. (Propionyl DHP (1 eq.) and phenylethyl amine (1 eq.) in CDCl<sub>3</sub>).

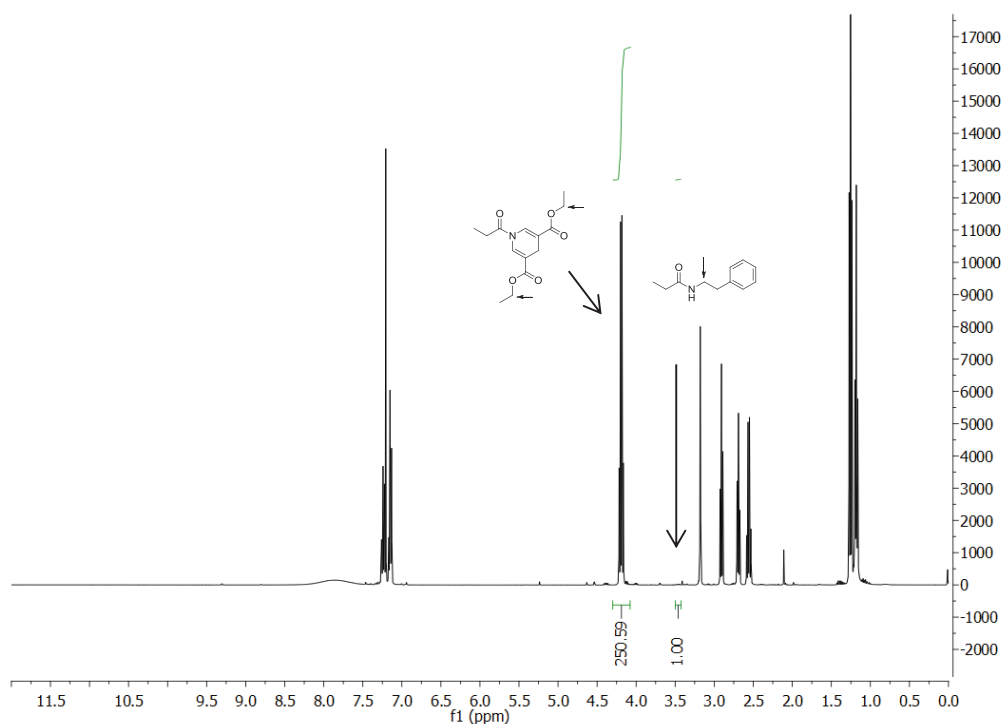

After 48 h at 60 °C < 1% product formation. (Propionyl DHP (1 eq.) and phenylethyl amine (1 eq.) in CDCl<sub>3</sub>). Zoom 6-0 ppm

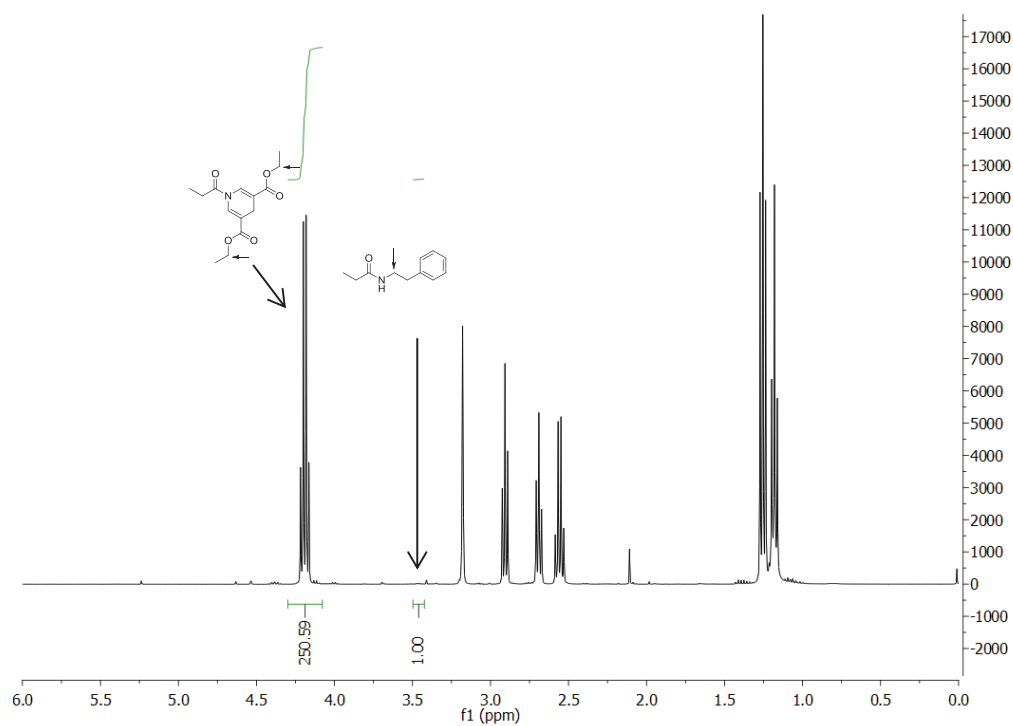

## Stability of DHP amide 1 towards amide bond formation (CDCl<sub>3</sub>)

To a solution of propionyl DHP (10 mg, 1 eq.) in CDCl<sub>3</sub> (0.6 mL) was phenylethyl amine (71  $\mu$ L, 1 eq.), from a 0.5 M solution in CDCl<sub>3</sub>, and DMAP (3 eq.) added. The solution was stirred in a 4 mL vial at the specified temperature and the product formation was monitored by crude <sup>1</sup>H-NMR spectroscopy directly from the crude reaction mixture.

**After 24 h at rt. < 1% product formation. (Propionyl DHP (1 eq.), phenylethyl amine (1 eq.), and DMAP (3 eq.) in CDCl<sub>3</sub>).**

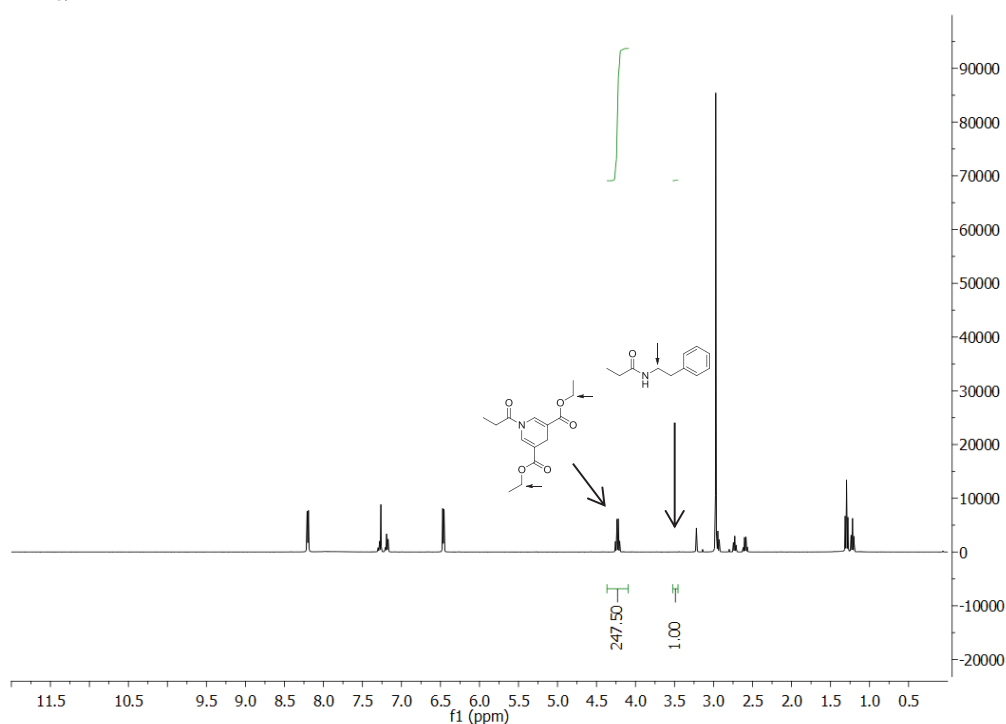

### Zoom 0-6 ppm

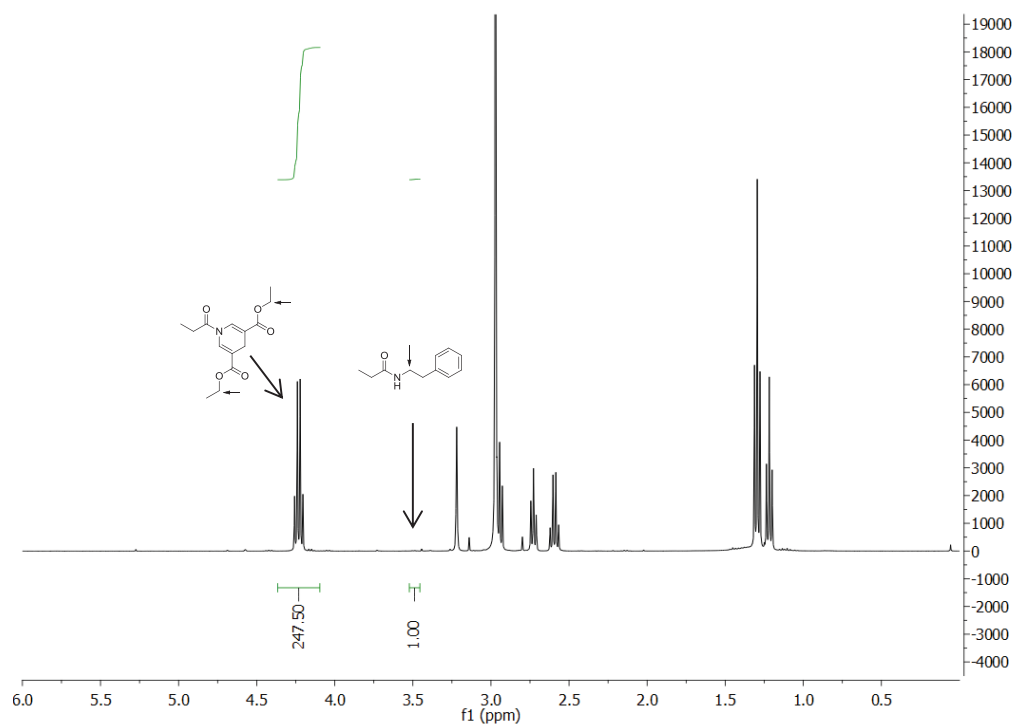

### Overlay spectra. The crude mixture (shown in blue) with overlay of the reference product (shown in red)

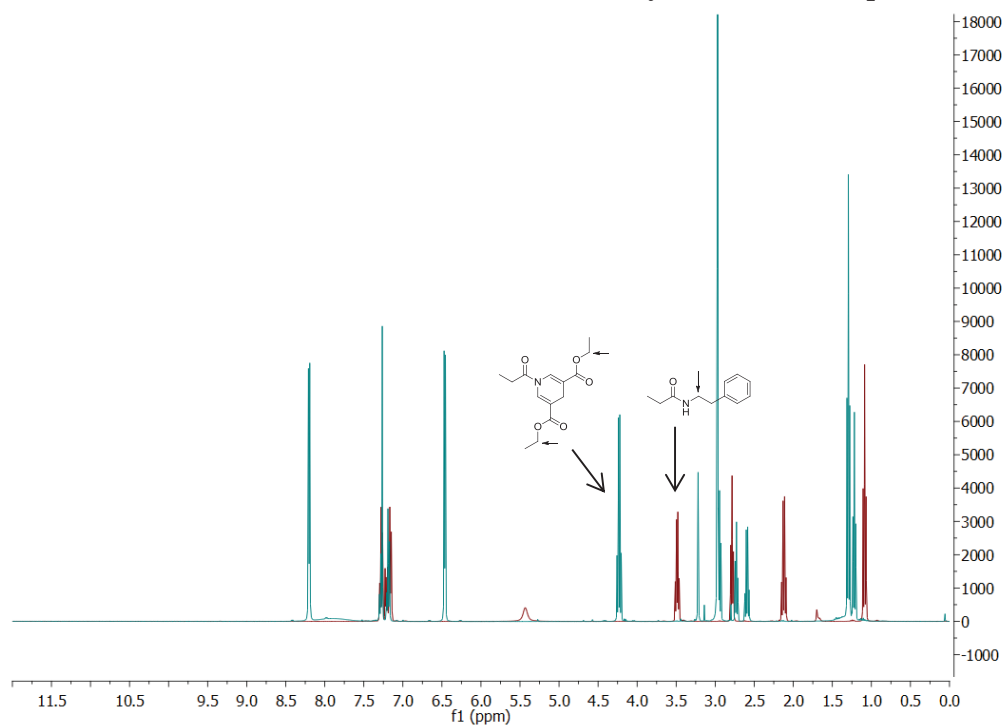

**Zoomed overlay spectra with increased intensity of peaks in the crude mixture**

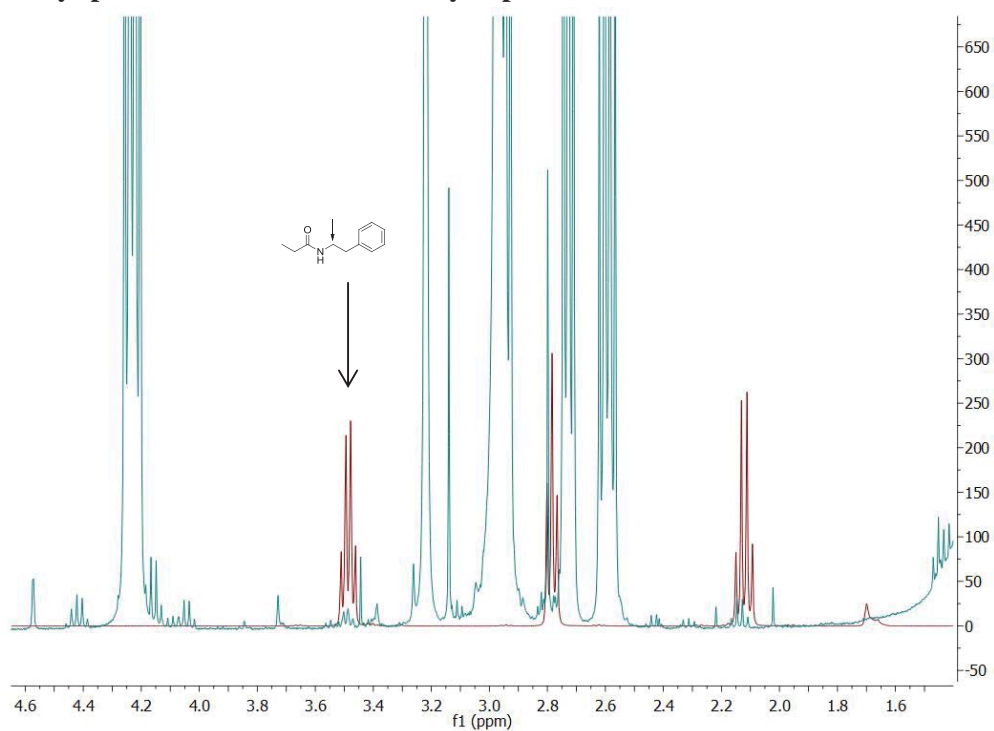

**After 48 h at rt. < 2% product formation. (Propionyl DHP (1 eq.), phenylethyl amine (1 eq.), and DMAP (3 eq.) in  $\text{CDCl}_3$ ).**

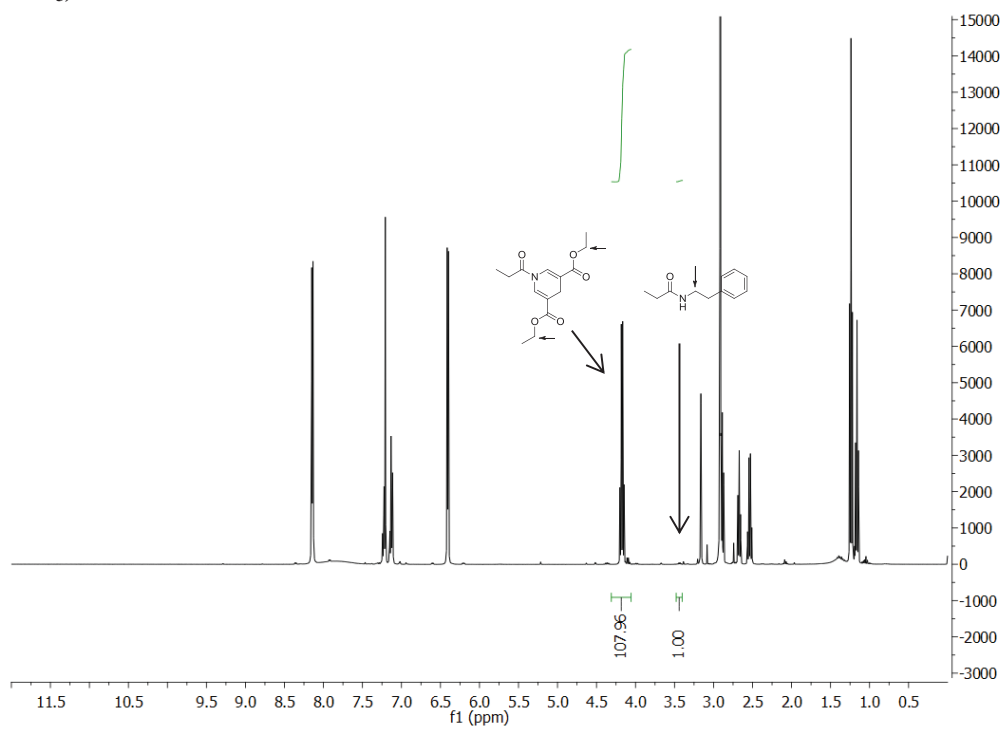

After 48 h at rt. < 2% product formation. (Propionyl DHP (1 eq.), phenylethyl amine (1 eq.), and DMAP (3 eq.) in CDCl<sub>3</sub>). Zoom 6-0 ppm

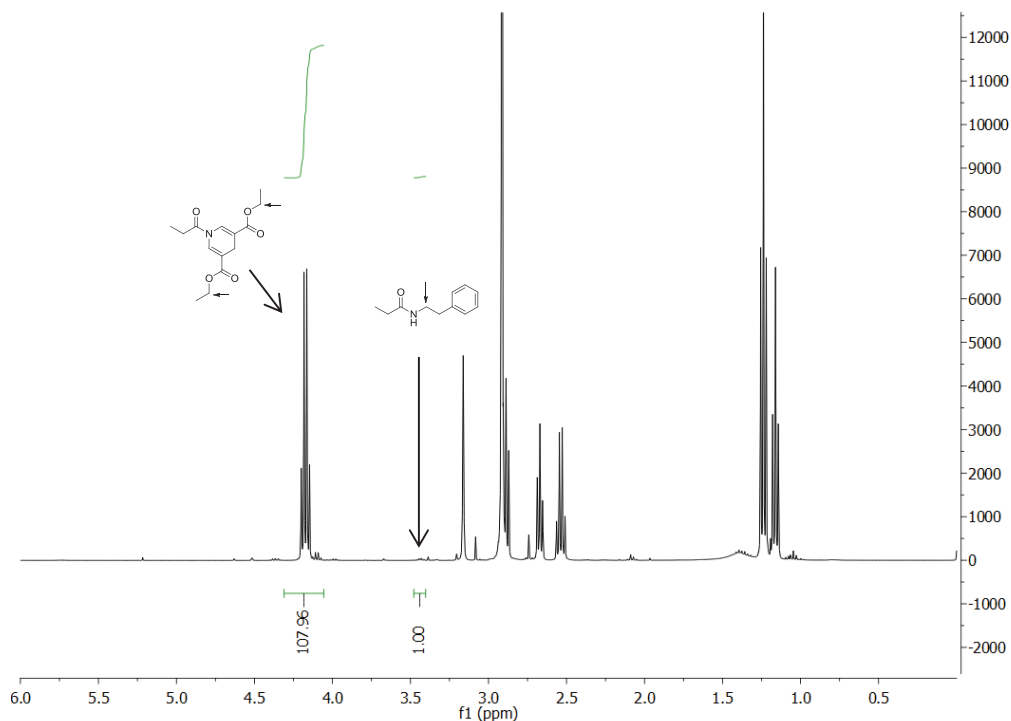

After 24 h at 40 °C < 2% product formation. (Propionyl DHP (1 eq.), phenylethyl amine (1 eq.), and DMAP (3 eq.) in CDCl<sub>3</sub>).

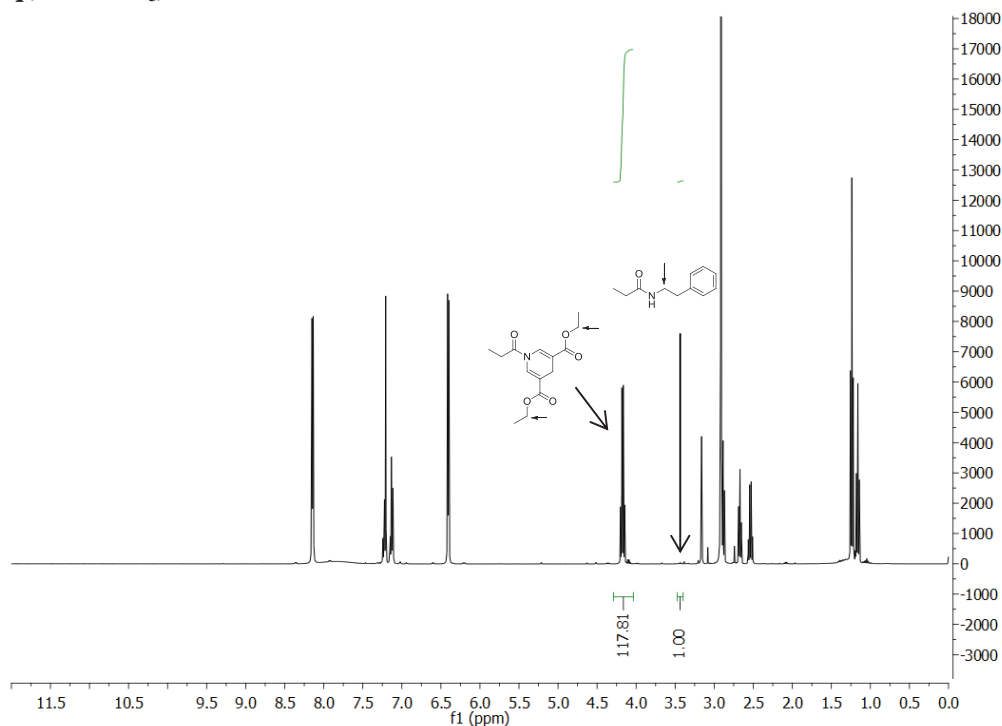

After 24 h at 40 °C < 2% product formation. (Propionyl DHP (1 eq.), phenylethyl amine (1 eq.), and DMAP (3 eq.) in CDCl<sub>3</sub>). Zoom 6-0 ppm.

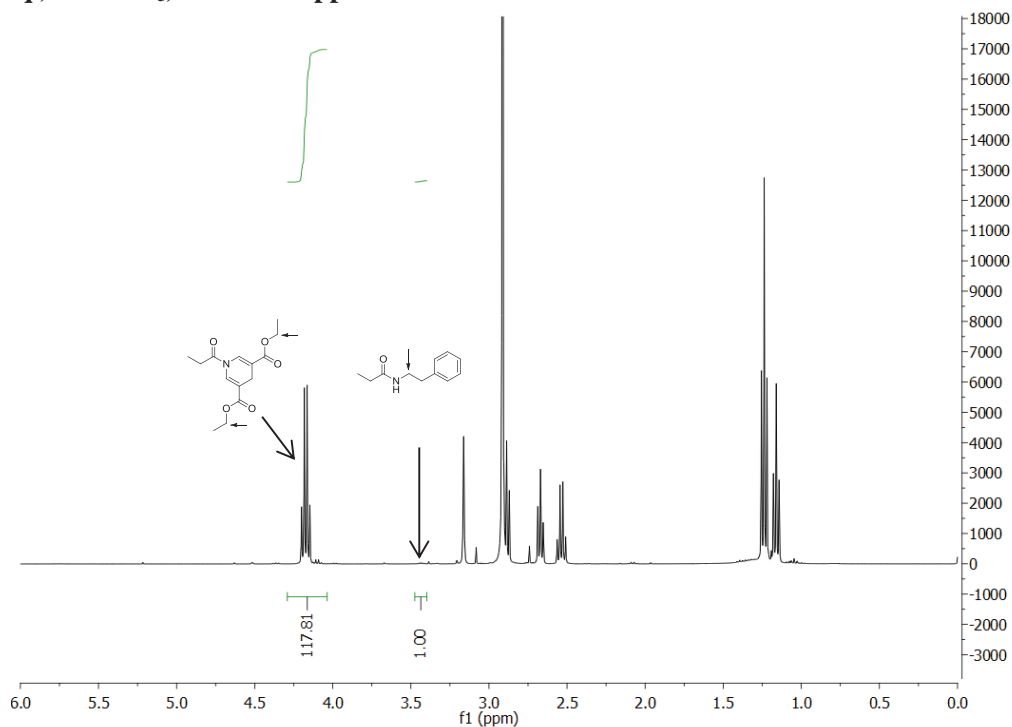

After 48 h at 40 °C < 6% product formation. (Propionyl DHP (1 eq.), phenylethyl amine (1 eq.), and DMAP (3 eq.) in CDCl<sub>3</sub>).

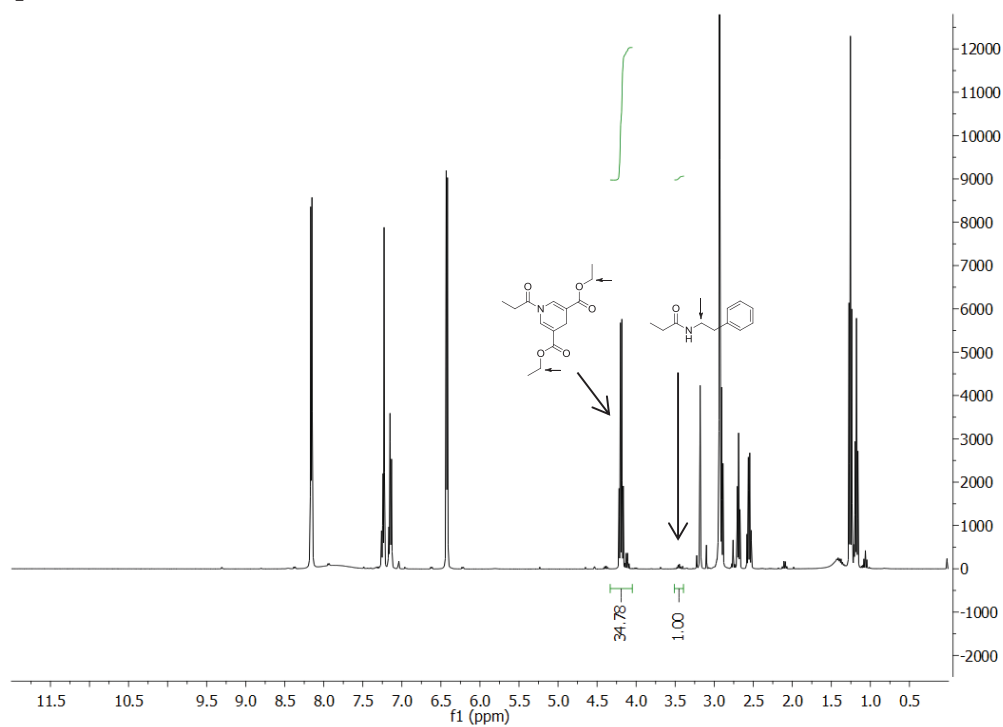

fter 48 h at 40 °C < 6% product formation. (Propionyl DHP (1 eq.), phenylethyl amine (1 eq.), and DMAP (3 eq.) in CDCl<sub>3</sub>). Zoom 6-0 ppm.

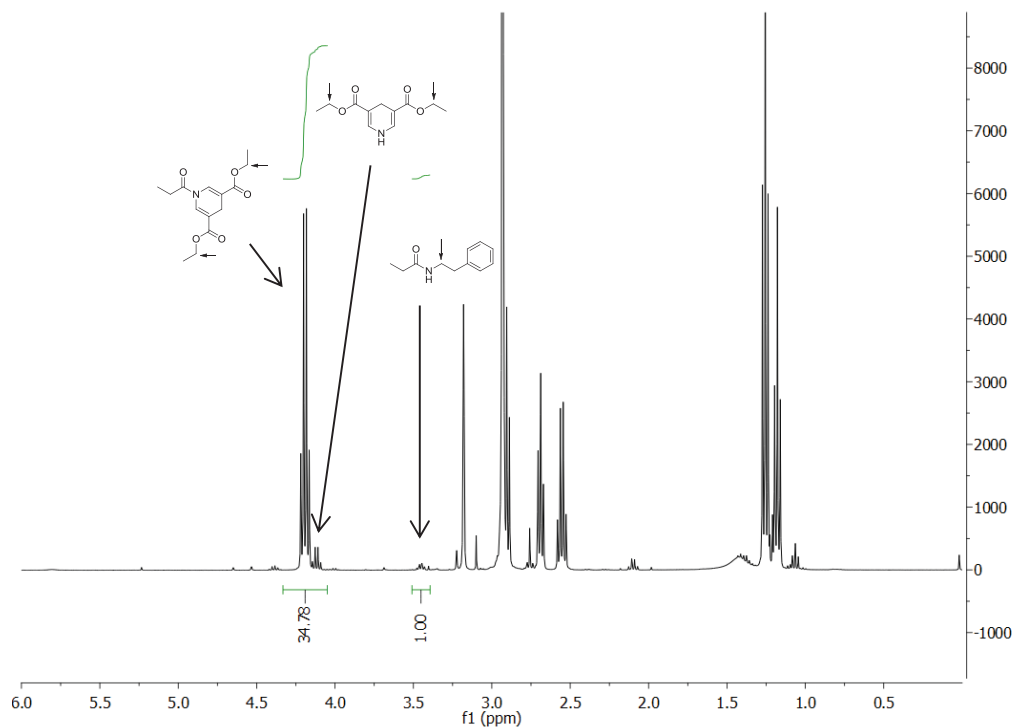

After 24 h at 60 °C < 6% product formation. (Propionyl DHP (1 eq.), phenylethyl amine (1 eq.), and DMAP (3 eq.) in CDCl<sub>3</sub>).

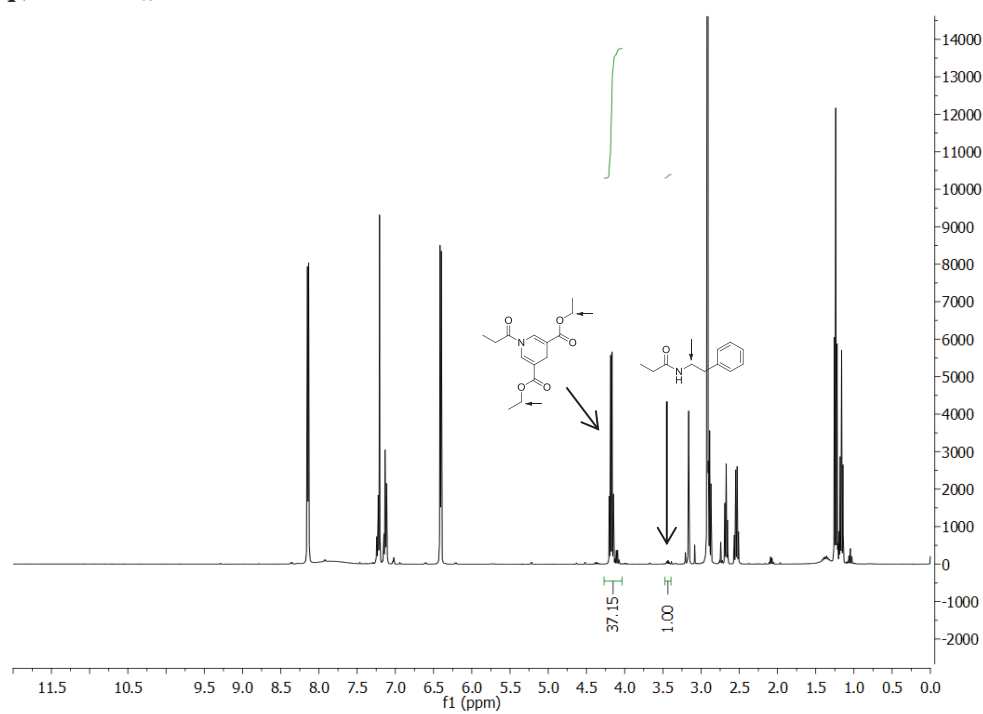

After 24 h at 60 °C < 6% product formation. (Propionyl DHP (1 eq.), phenylethyl amine (1 eq.), and DMAP (3 eq.) in CDCl<sub>3</sub>). Zoom 6-0 ppm.

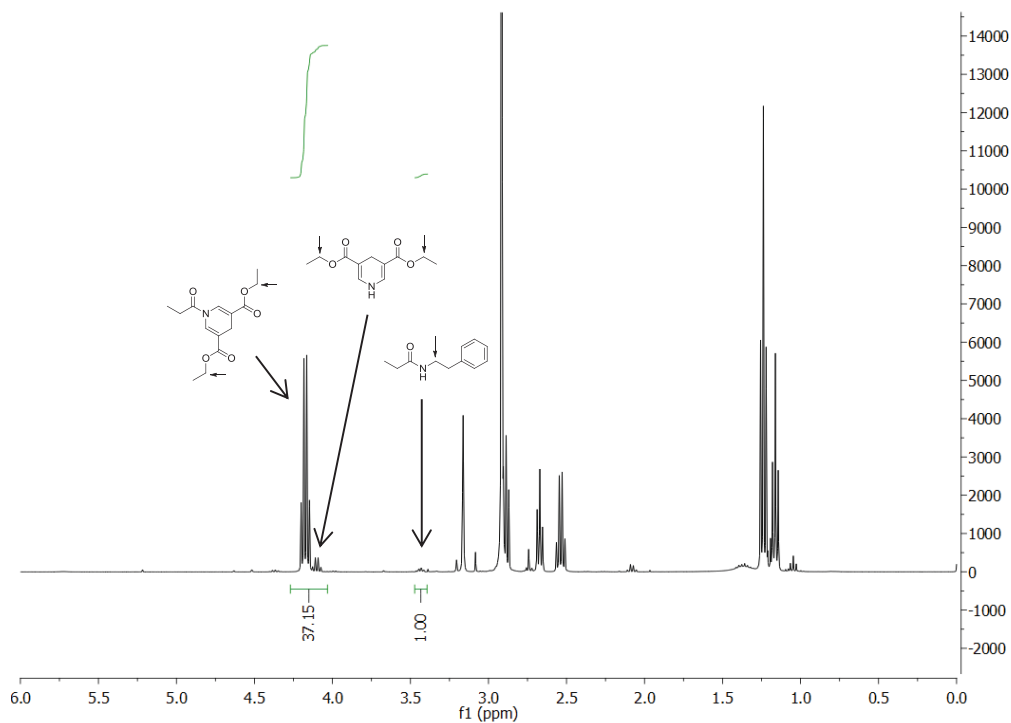

After 48 h at 60 °C < 7% product formation. (Propionyl DHP (1 eq.), phenylethyl amine (1 eq.), and DMAP (3 eq.) in CDCl<sub>3</sub>).

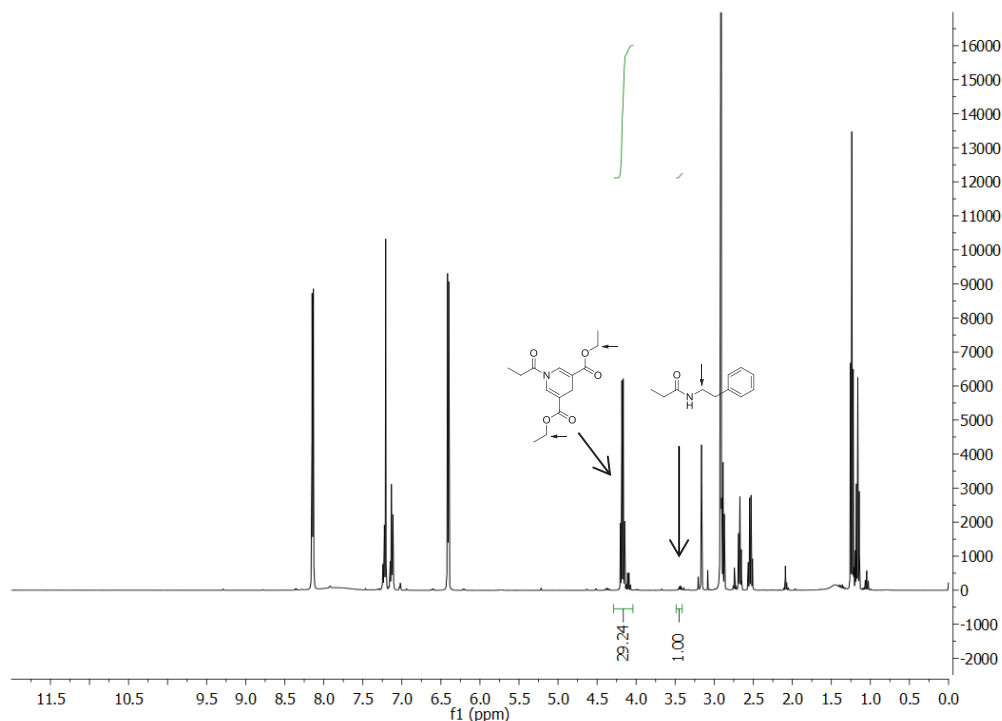

After 48 h at 60 °C < 7% product formation. (Propionyl DHP (1 eq.), phenylethyl amine (1 eq.), and DMAP (3 eq.) in CDCl<sub>3</sub>). Zoom 6-0 ppm.

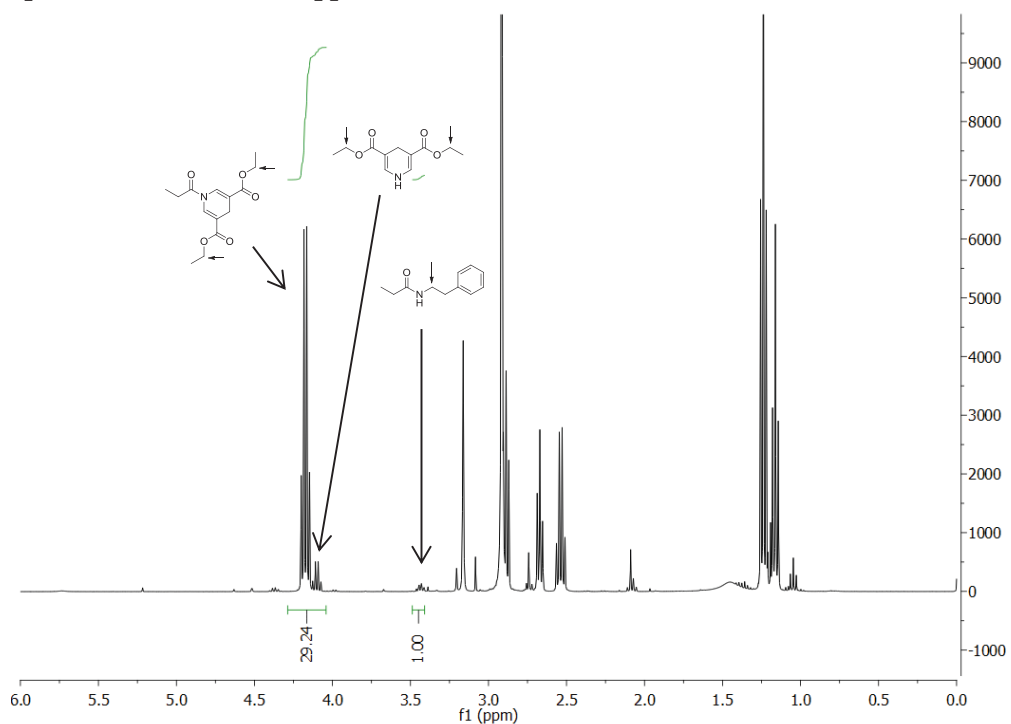

## Stability of DHP amide 1 towards amide bond formation (DCM)

To a solution of propionyl DHP (10 mg, 1 eq.) in DCM (0.6 mL) was phenylethyl amine (71  $\mu$ L, 1 eq.), from a 0.5 M solution in DCM, added. The solution was stirred in a 4 mL vial at rt. and the product formation was monitored by crude  $^1\text{H}$ -NMR spectroscopy directly from the crude reaction mixture.

**After 24 h < 1% product formation. (Propionyl DHP (1 eq.) and phenylethyl amine (1 eq.) in DCM)**

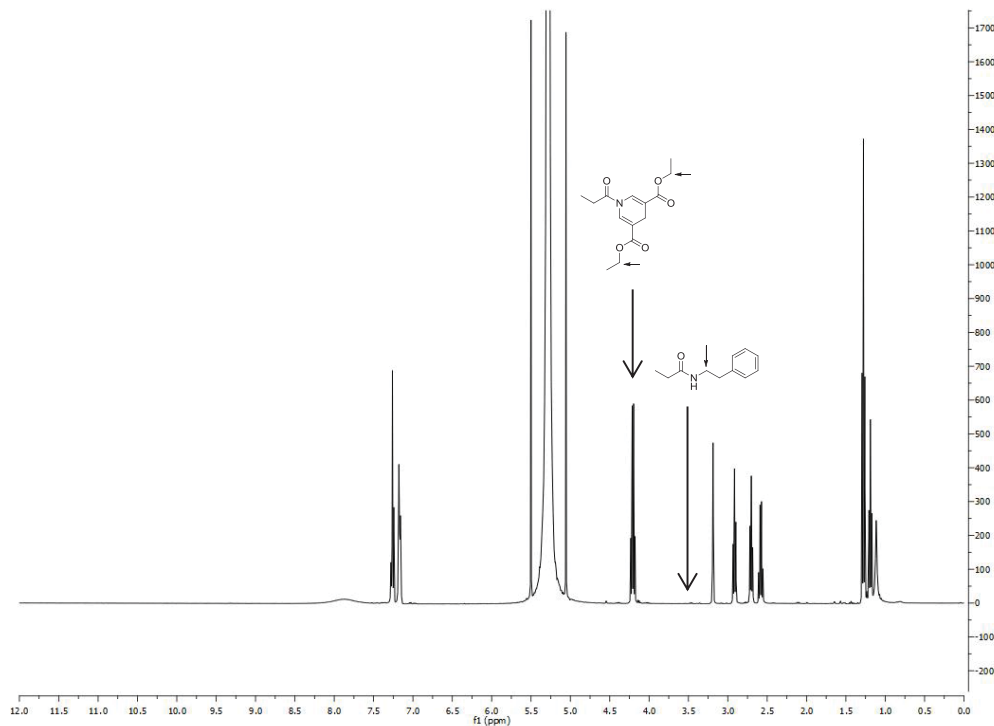

### Zoom 0-6 ppm

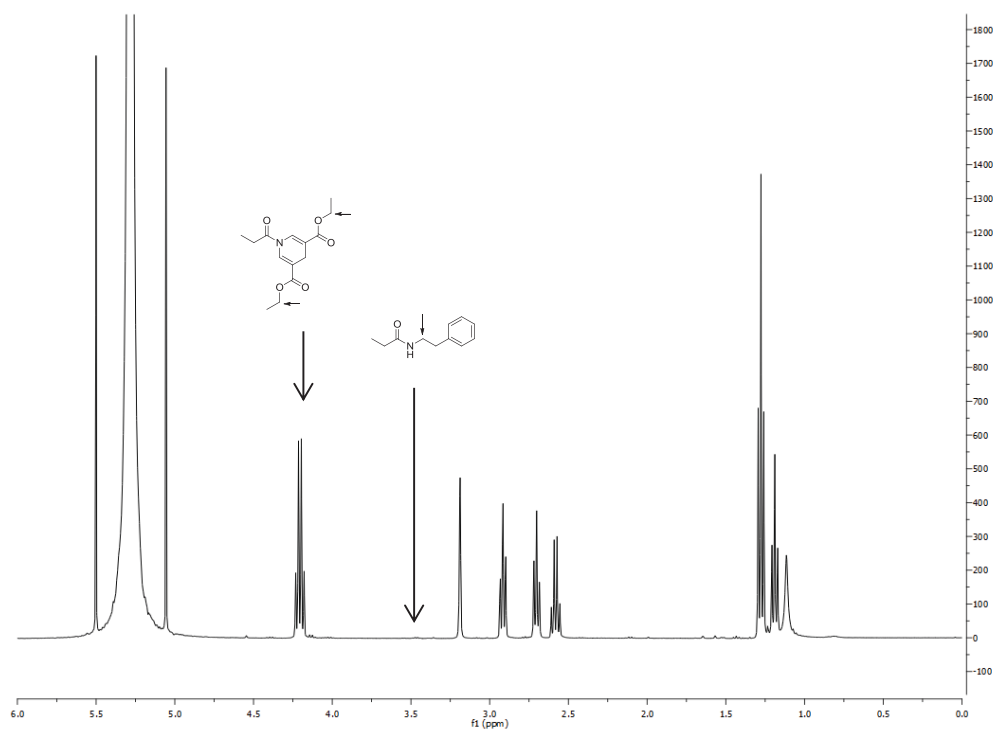

### Overlay spectra. The crude mixture (shown in blue) with overlay of the reference product (shown in red)

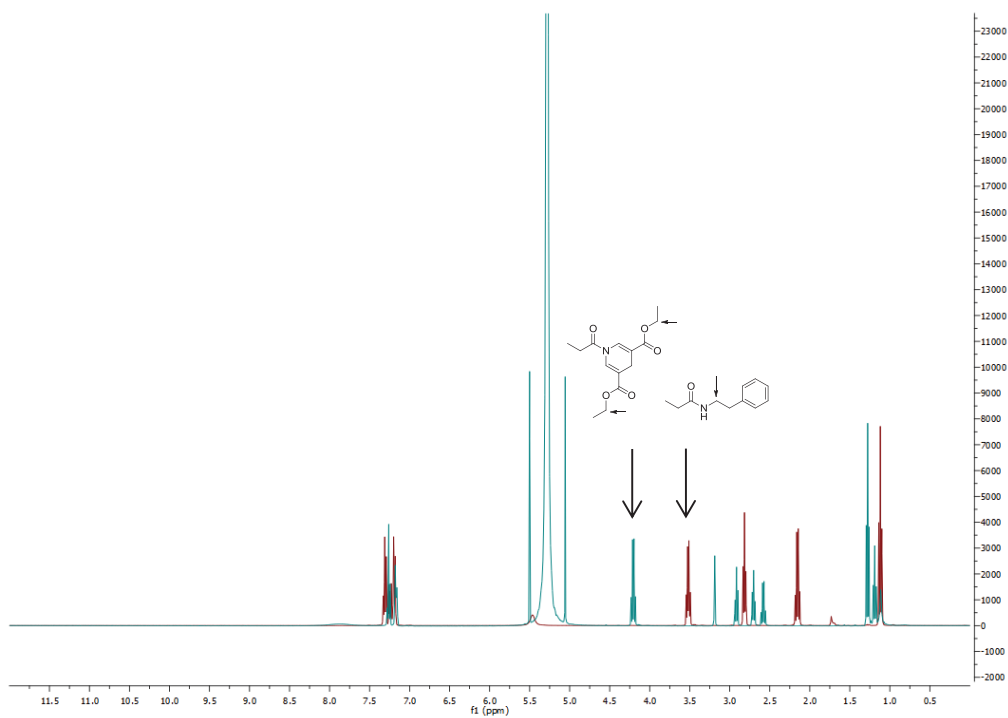

**Zoomed overlay spectra with increased intensity of peaks in the crude mixture**

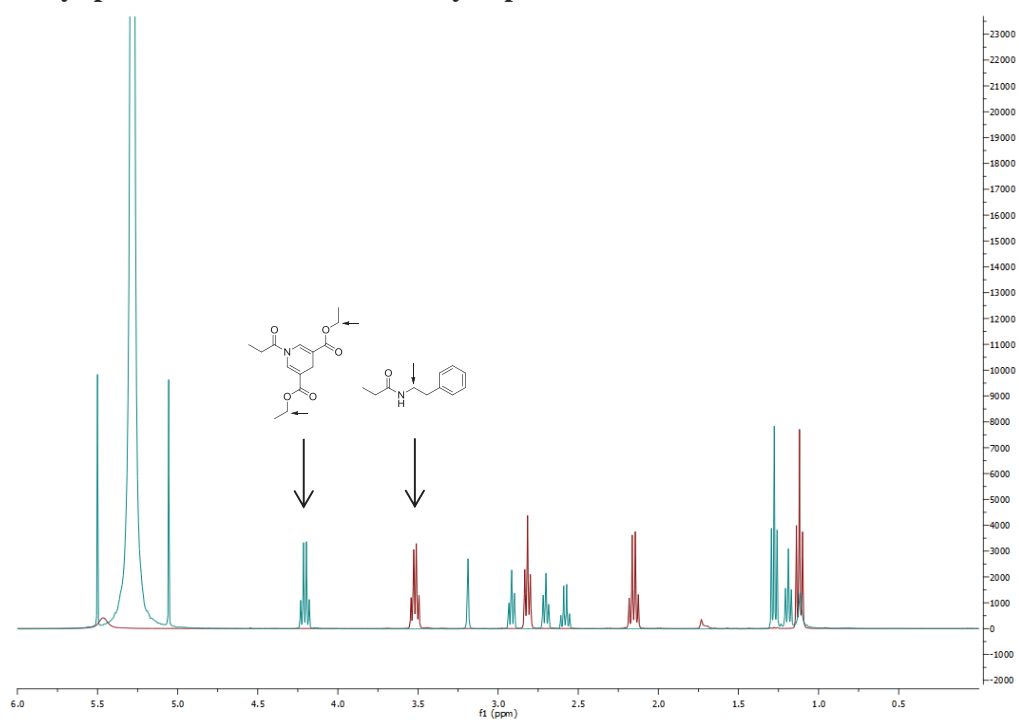

**After 48 h < 1% product formation. (Propionyl DHP (1 eq.) and phenylethyl amine (1 eq.) in DCM)**

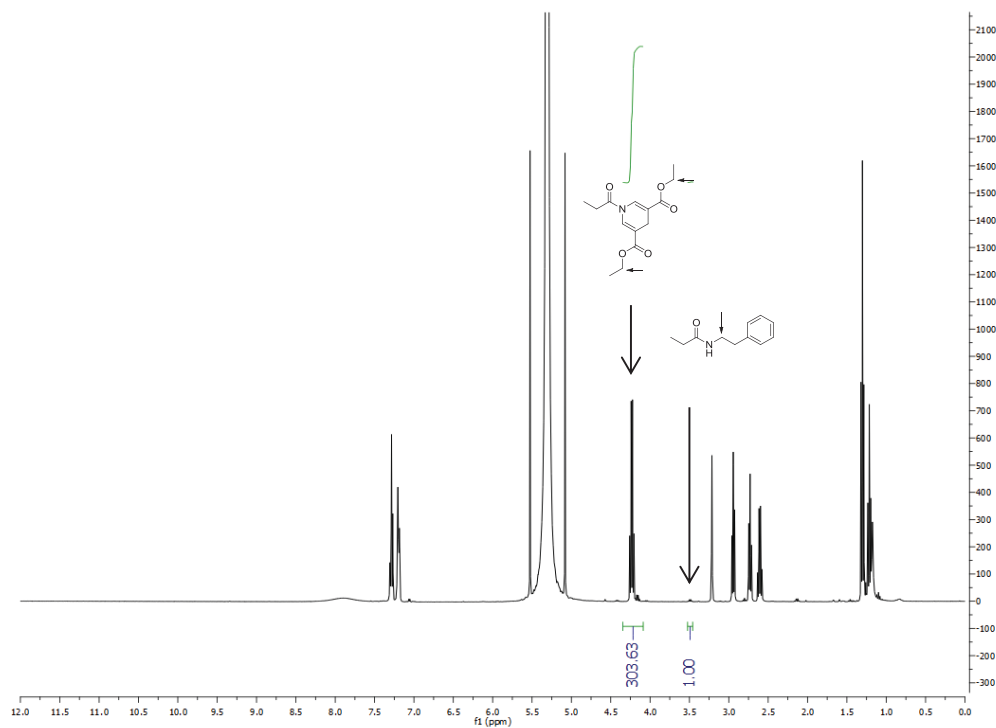

After 48 h < 1% product formation. (Propionyl DHP (1 eq.) and phenylethyl amine (1 eq.) in DCM).  
Zoom 0-6 ppm

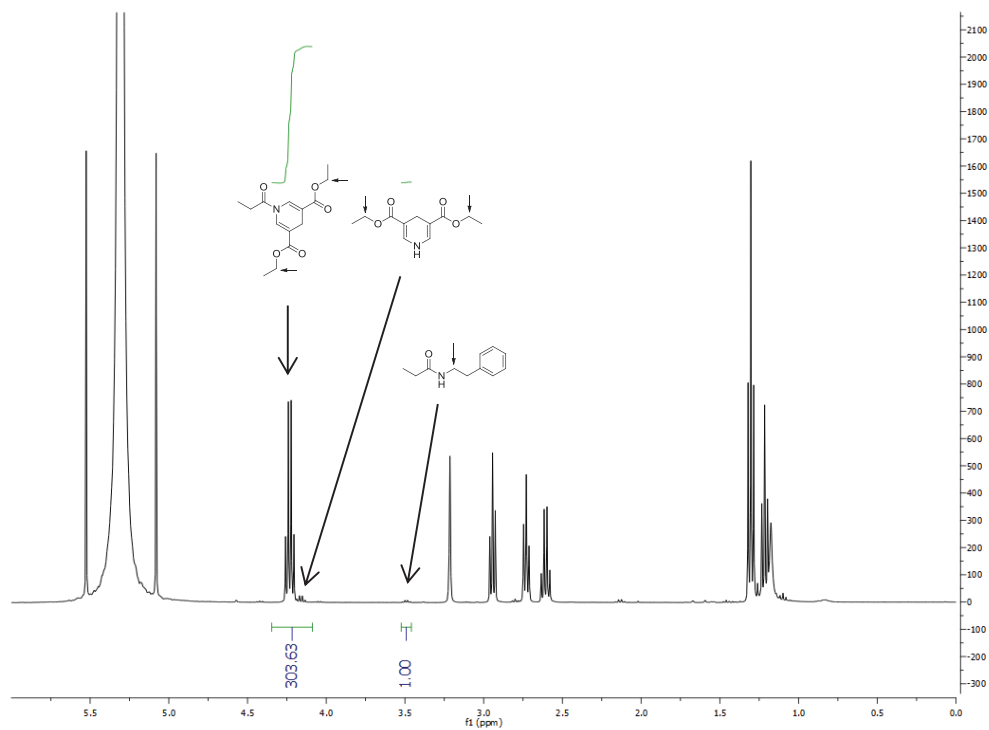

## Stability of DHP amide 1 towards amide bond formation (DCM)

To a solution of propionyl DHP (10 mg, 1 eq.) in DCM (0.6 mL) was phenylethyl amine (71  $\mu$ L, 1 eq.), from a 0.5 M solution in DCM, and DMAP (3 eq.) added. The solution was stirred in a 4 mL vial at rt. and the product formation was monitored by crude  $^1\text{H}$ -NMR spectroscopy directly from the crude reaction mixture.

**After 24 h < 6% product formation. (Propionyl DHP (1 eq.), phenylethyl amine (1 eq.), and DMAP (3 eq.) in DCM)**

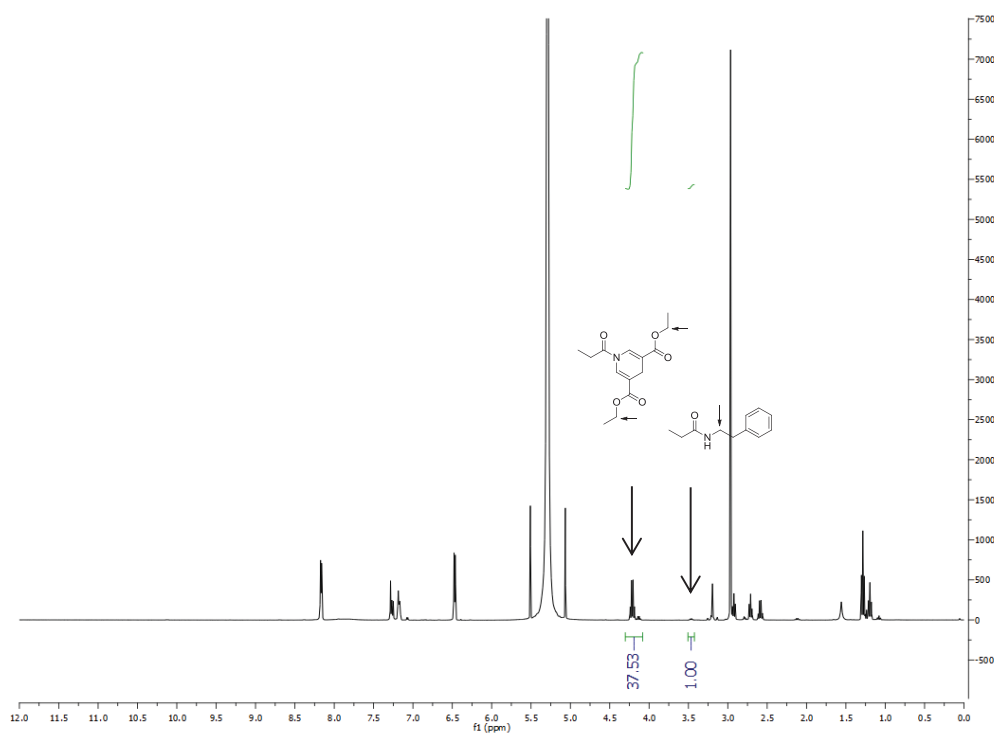

### Zoom 0-6 ppm

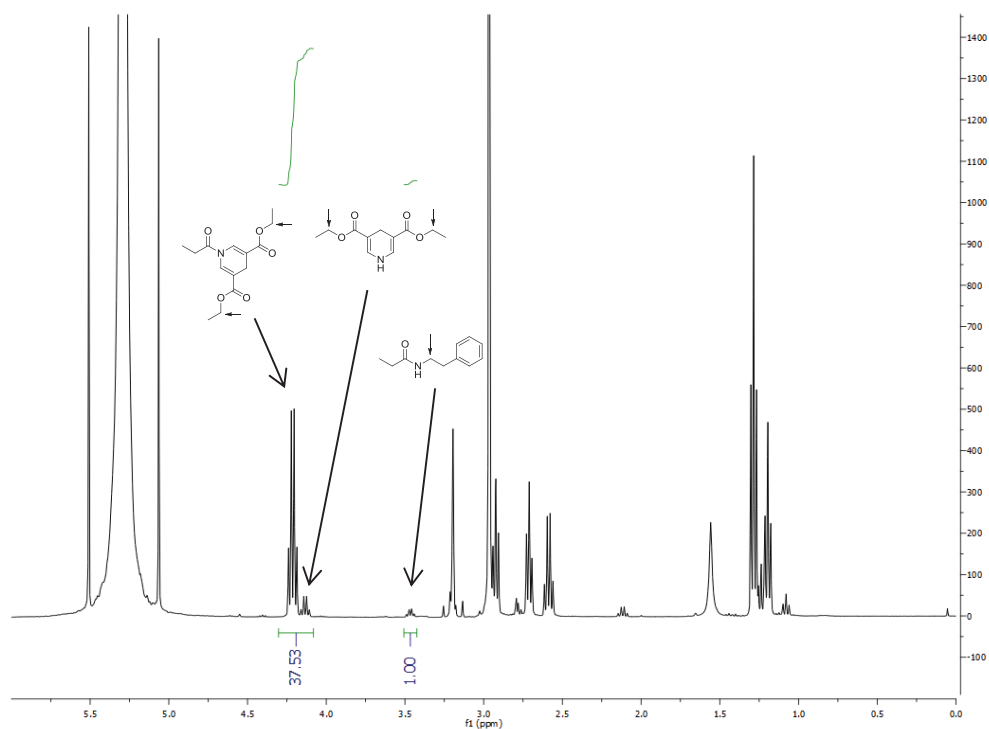

### Overlay spectra. The crude mixture (shown in blue) with overlay of the reference product (shown in red)

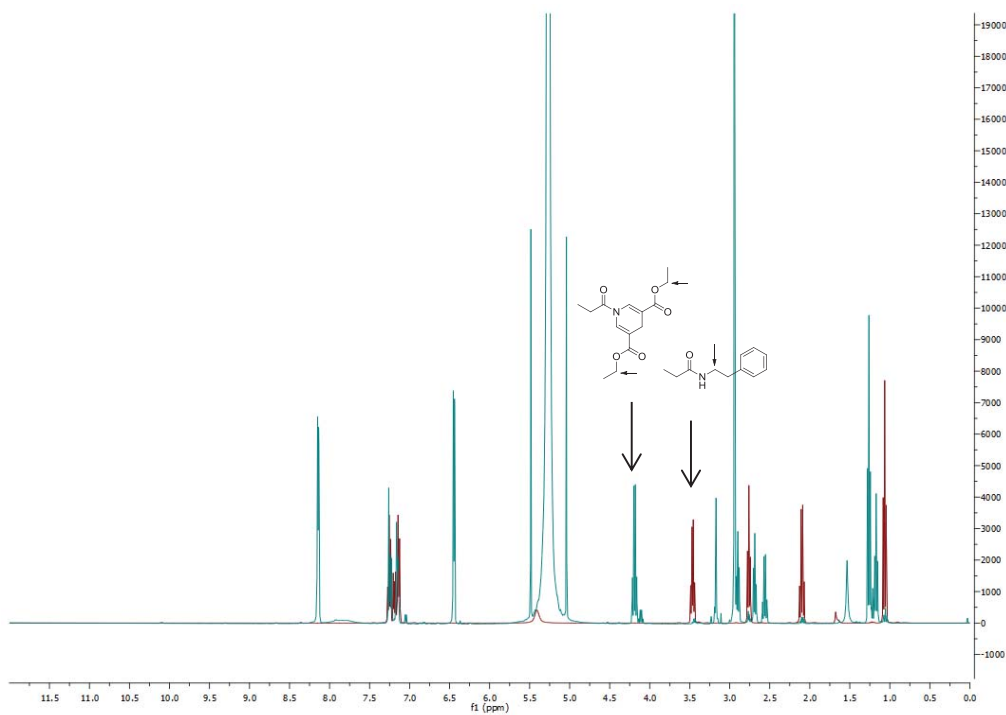

**Zoomed overlay spectra with increased intensity of peaks in the crude mixture**

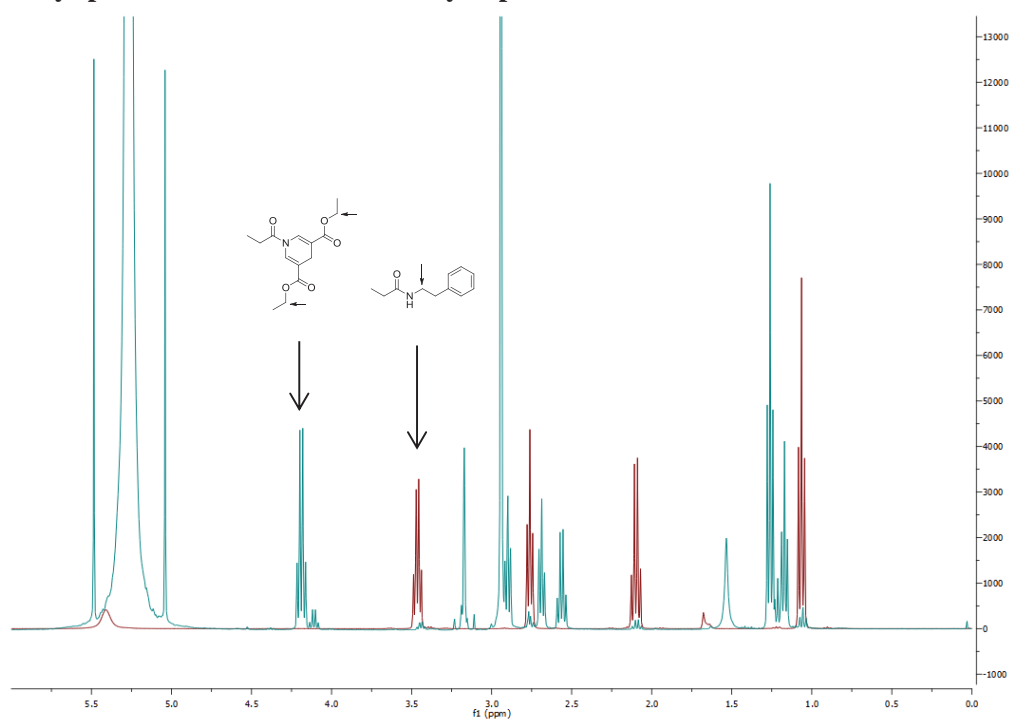

**After 48 h < 18% product formation. (Propionyl DHP (1 eq.), phenylethyl amine (1 eq.), and DMAP (3 eq.) in DCM)**

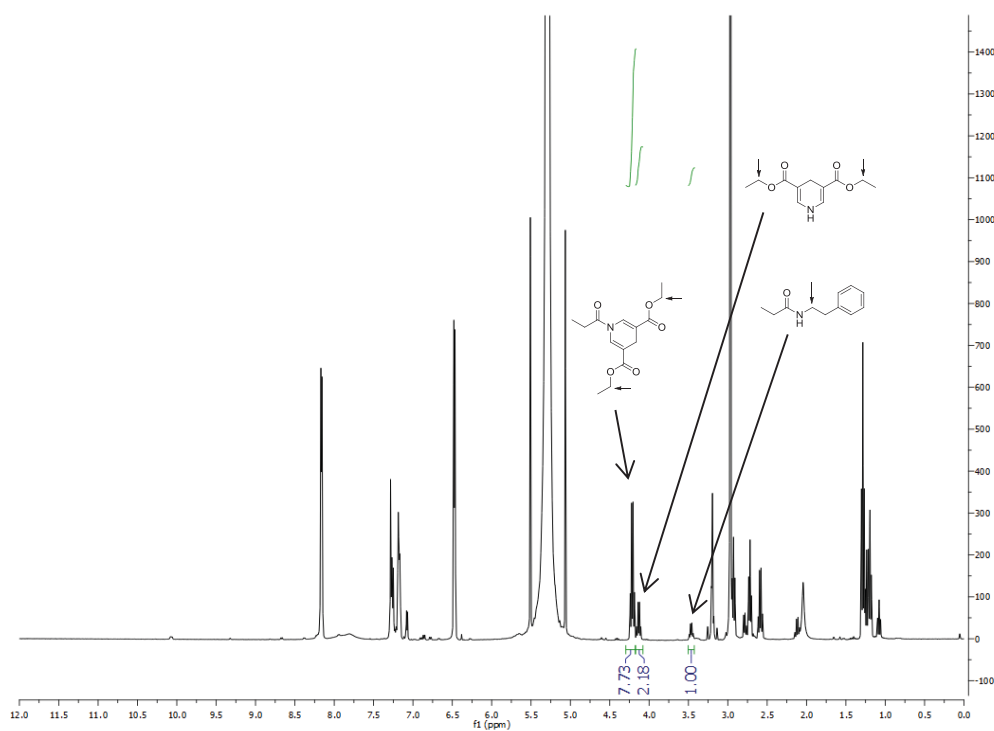

After 48 h < 18% product formation. (Propionyl DHP (1 eq.), phenylethyl amine (1 eq.), and DMAP (3 eq.) in DCM. Zoom 0-6 ppm

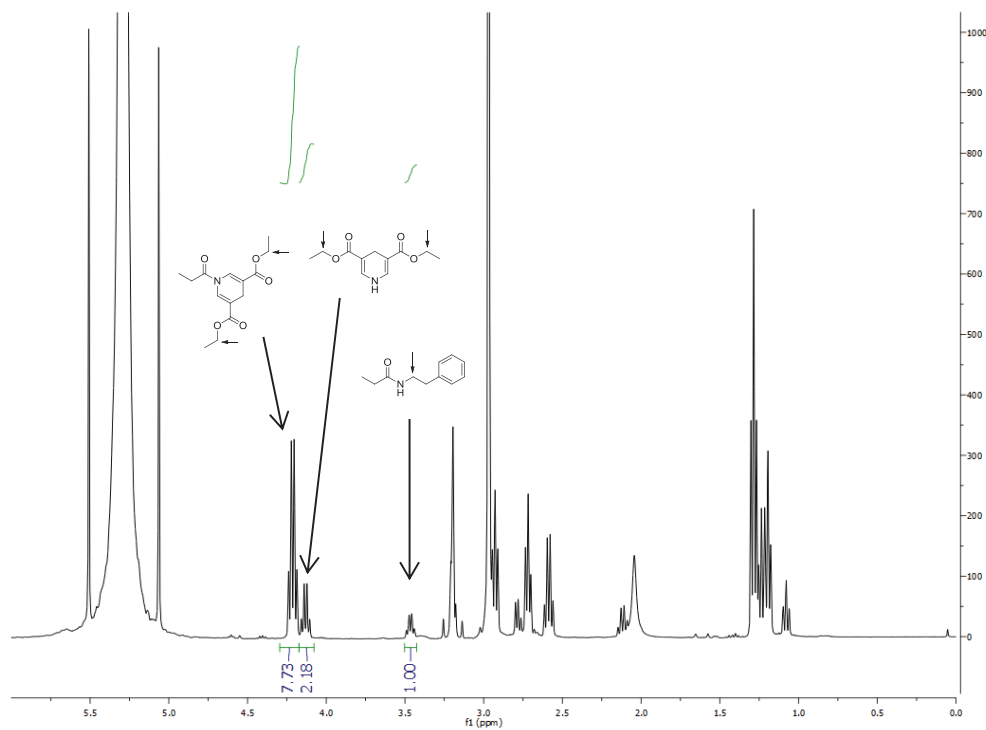

## Stability of DHP amide 1 towards amide bond formation in various solvents

To a solution of propionyl DHP (10 mg) in the solvent specified (0.6 mL) was phenylethyl amine (71  $\mu$ L, 1 eq.) from 0.5 M solution in the solvent specified, added. The solution was stirred in a 4 mL vial at rt. and the product formation was monitored by crude  $^1\text{H}$ -NMR spectroscopy of the crude reaction mixture.

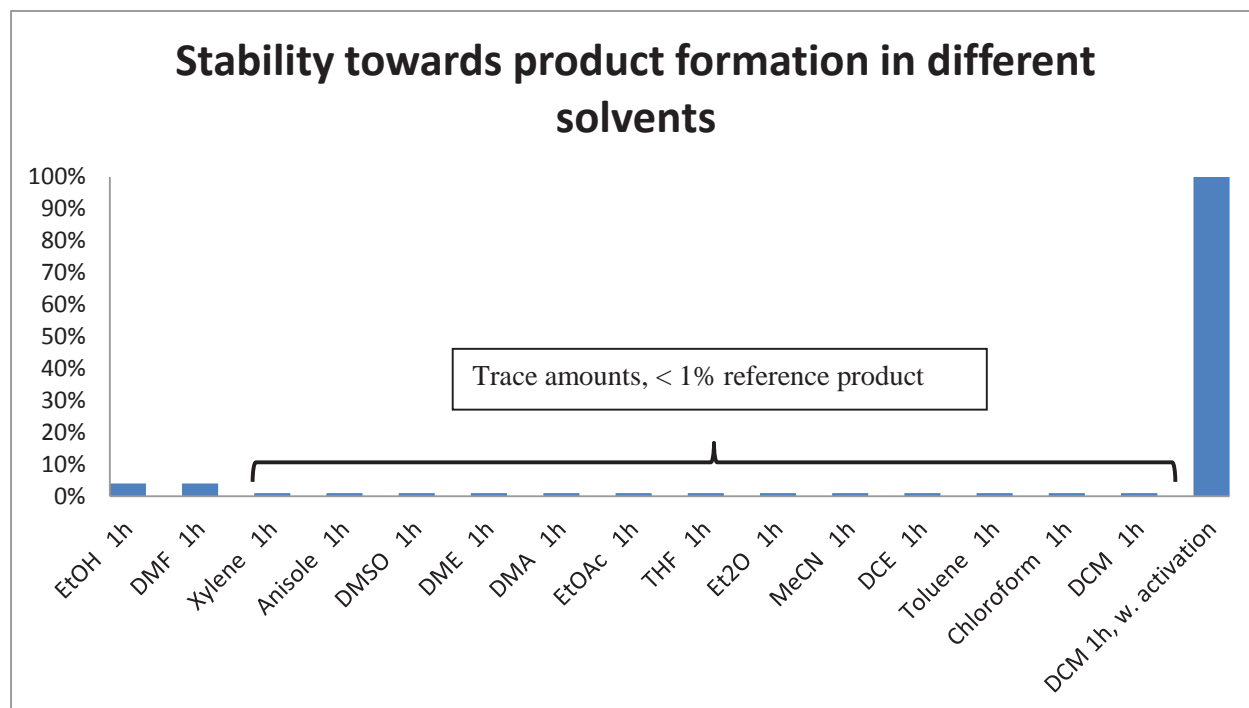

## Stability towards product formation in different solvents

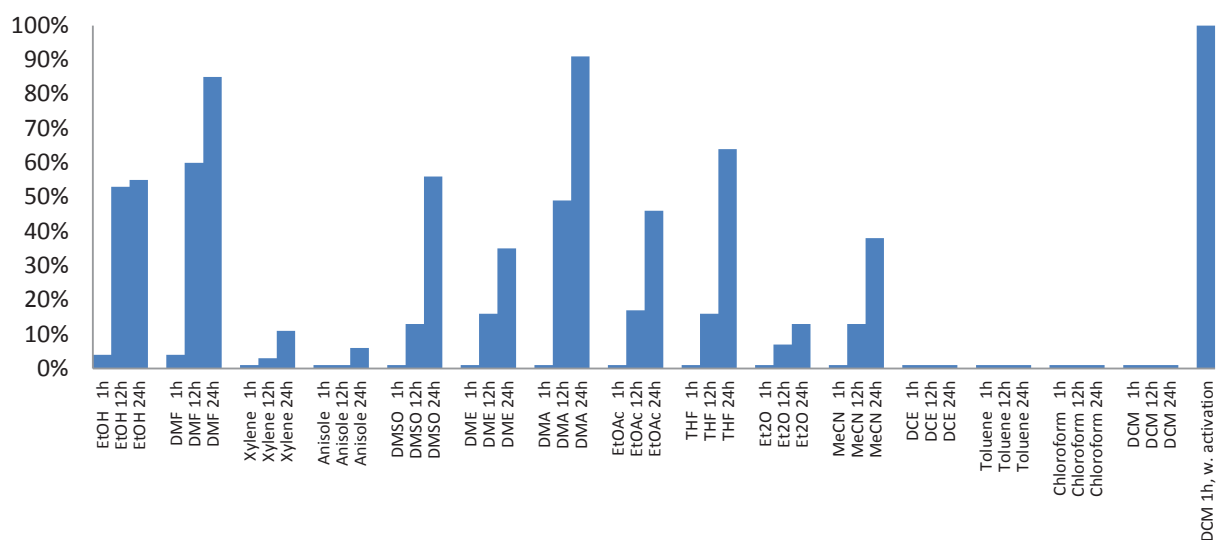

## Investigation of reaction intermediates by LC-MS

Reaction conditions:

To a solution of DHP amide **1** (14 mg, 0.048 mmol, 1.1 eq.) in DCM (0.8 mL) was DDQ (10 mg, 0.044 mmol, 1 eq.) added. After 30 minutes the reaction was monitored by LC-MS. The peaks in the resulting LC chromatogram were then identified by doing separate LC chromatograms for the individual compounds. A small drift in retention time is in some cases observed.

The LC chromatogram obtained after 30 minutes of oxidation w. DDQ is the following:

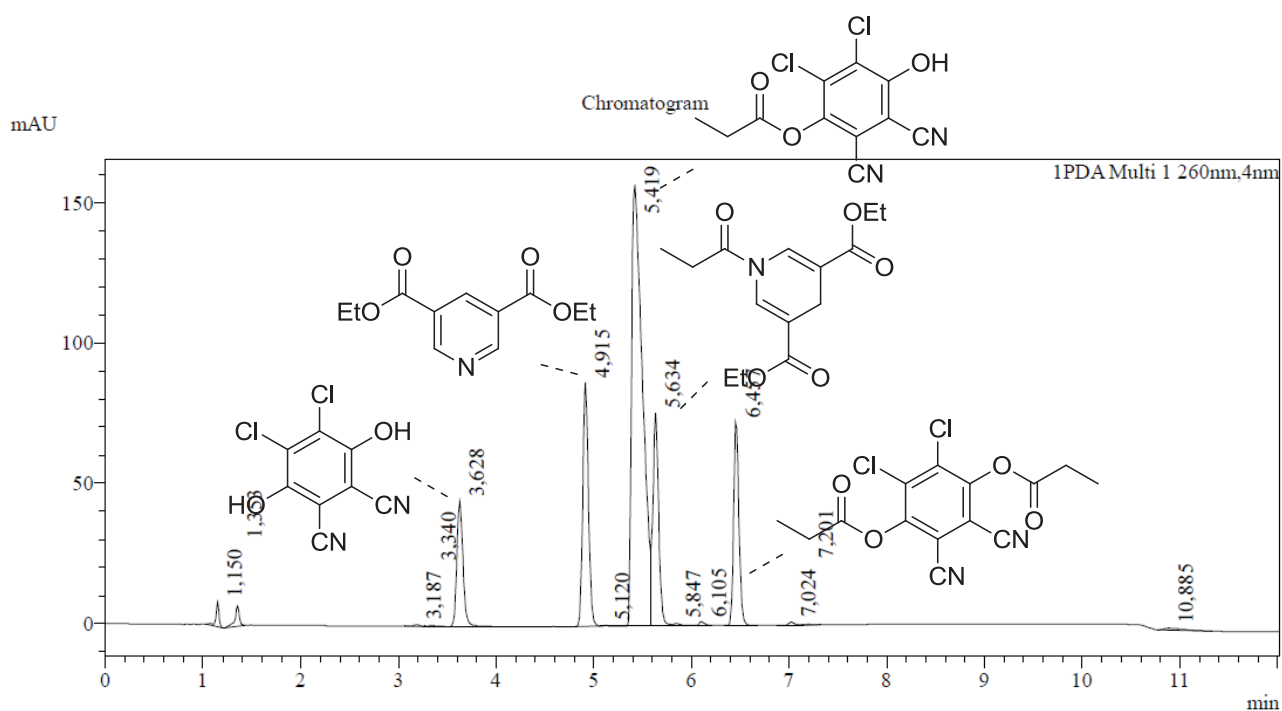

Individual LC chromatograms for the individual compounds proposed as reaction intermediates:

### Reduced DDQ

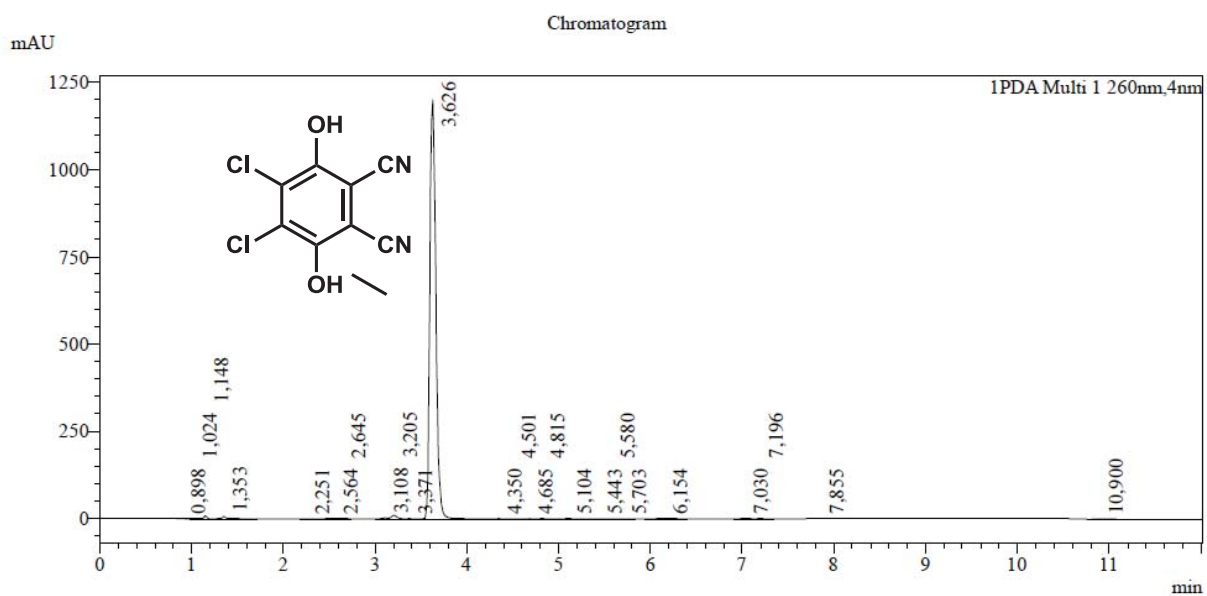

## Di-ethyl pyridine ester 4

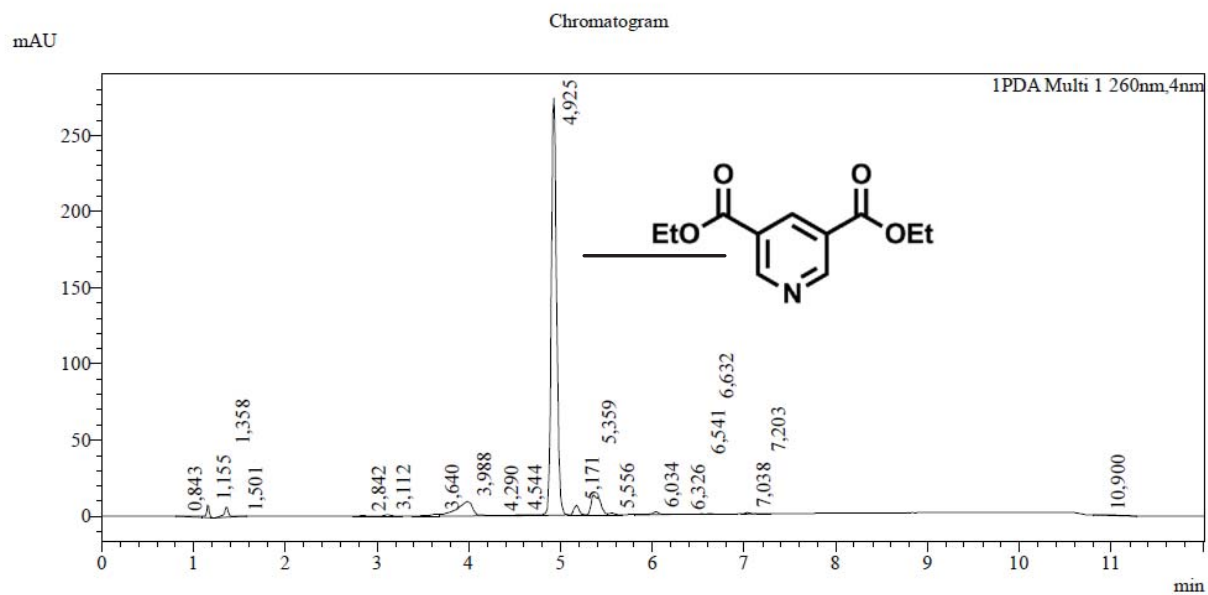

## Mono ester of reduced DDQ

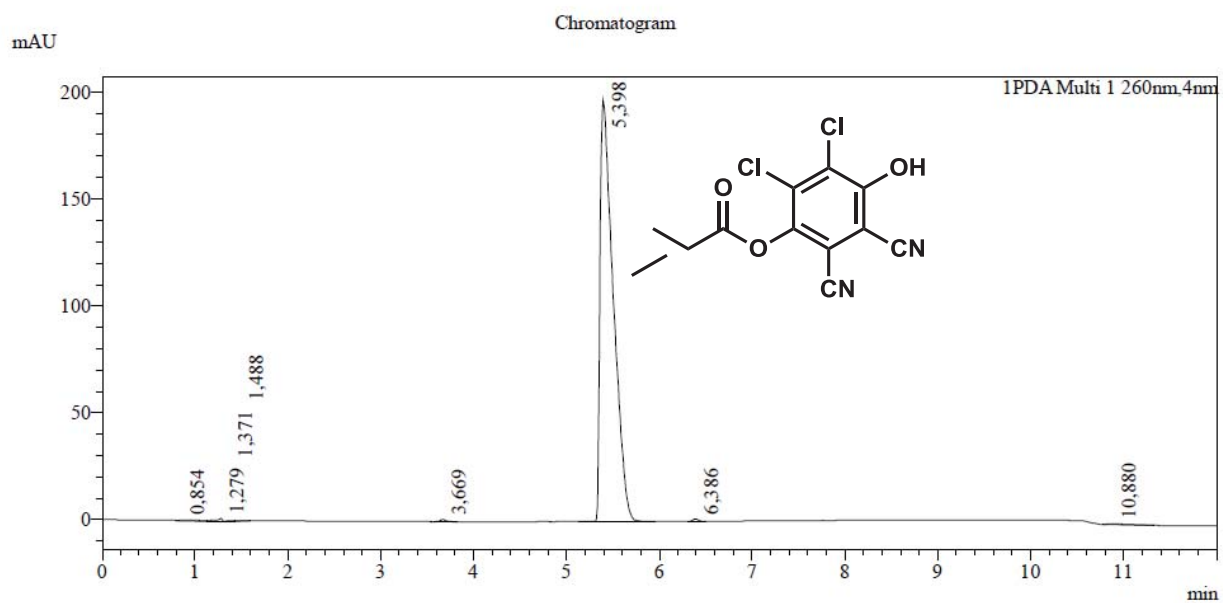

## DHP amide 1

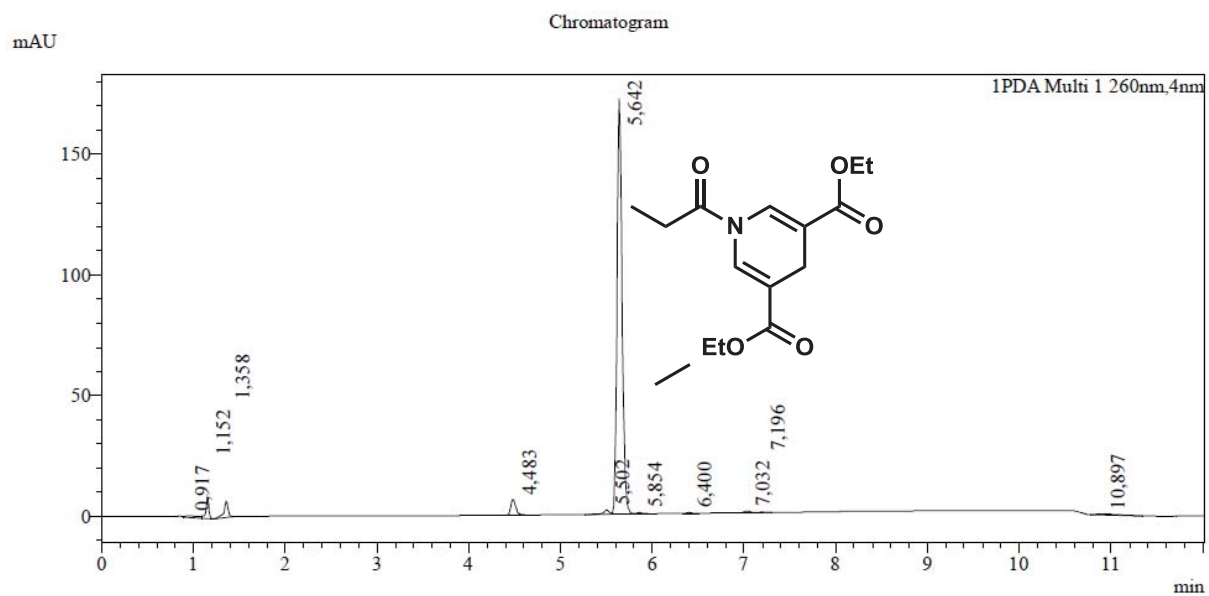

## Di ester of reduced DDQ

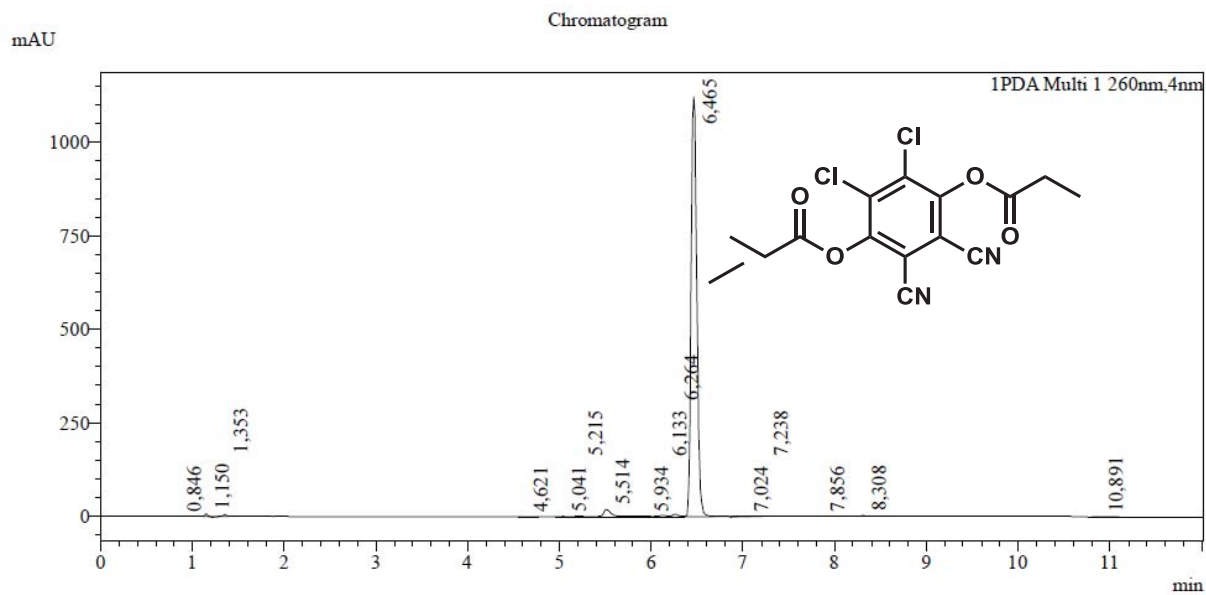

## Optimization of DDP (1) oxidation

Optimization of reaction conditions for the oxidation of DDP amide **1**.<sup>a</sup>

| 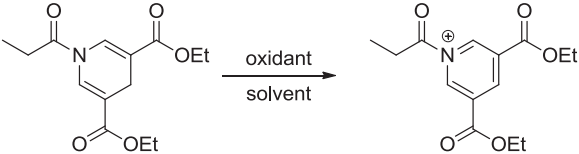 |                                                 |                   |           |          |                |
|------------------------------------------------------------------------------------|-------------------------------------------------|-------------------|-----------|----------|----------------|
| Entry <sup>a</sup>                                                                 | Oxidant                                         | Solvent           | Temp (°C) | Time (h) | Conversion (%) |
| 1                                                                                  | Cu(NO <sub>3</sub> ) <sub>2</sub>               | CDCl <sub>3</sub> | rt        | 5        | -              |
| 2                                                                                  | CuCl <sub>2</sub>                               | CDCl <sub>3</sub> | rt        | 5        | -              |
| 3                                                                                  | Cu(OAc) <sub>2</sub>                            | CDCl <sub>3</sub> | rt        | 5        | -              |
| 4                                                                                  | CuI                                             | CDCl <sub>3</sub> | rt        | 2        | -              |
| 5                                                                                  | TBAI                                            | CDCl <sub>3</sub> | rt        | 2        | -              |
| 6                                                                                  | NIS                                             | CDCl <sub>3</sub> | rt        | 2        | 51             |
| 7                                                                                  | ICl                                             | CDCl <sub>3</sub> | rt        | 1.5      | 51             |
| 8                                                                                  | ZnI <sub>2</sub>                                | CDCl <sub>3</sub> | rt        | 11       | 64             |
| 9                                                                                  | ZnI <sub>2</sub>                                | MeCN              | rt        | 2        | 11             |
| 10                                                                                 | ZnI <sub>2</sub> <sup>b</sup>                   | CDCl <sub>3</sub> | rt        | 2        | 78             |
| 11                                                                                 | ZnI <sub>2</sub> NaIO <sub>4</sub> <sup>c</sup> | CDCl <sub>3</sub> | rt        | 2        | 88             |
| 12                                                                                 | ZnBr <sub>2</sub>                               | CDCl <sub>3</sub> | rt        | 2        | -              |
| 13                                                                                 | ZnCl <sub>2</sub>                               | CDCl <sub>3</sub> | rt        | 2        | -              |
| 14                                                                                 | ZnSO <sub>4</sub>                               | CDCl <sub>3</sub> | rt        | 2        | -              |
| 15                                                                                 | Silica <sup>d</sup>                             | CDCl <sub>3</sub> | rt        | 11       | 5              |
| 16                                                                                 | DDQ                                             | CDCl <sub>3</sub> | rt        | 0.33     | 99             |
| 17                                                                                 | TPAP, NMO                                       | CDCl <sub>3</sub> | rt        | 5        | -              |
| 18                                                                                 | MnO <sub>2</sub>                                | CDCl <sub>3</sub> | rt        | 5        | -              |
| 19                                                                                 | CAN                                             | CDCl <sub>3</sub> | rt        | 5        | 7              |
| 20                                                                                 | CAN                                             | MeCN              | rt        | 2        | 42             |
| 21                                                                                 | TetrafluoroQ                                    | CDCl <sub>3</sub> | rt        | 2        | 2              |
| 22                                                                                 | Chloranil                                       | CDCl <sub>3</sub> | rt        | 11       | -              |
| 23                                                                                 | O <sub>2</sub> (balloon)                        | CDCl <sub>3</sub> | rt        | 24       | <5             |
| 24                                                                                 | NAD <sup>+</sup>                                | CDCl <sub>3</sub> | rt        | 48       | 10             |

<sup>a</sup>Reaction conditions: **1** (0.040 mmol), oxidant (0.040 mmol) were stirred in 0.6 mL of solvent in a sealed vial. <sup>b</sup> Reaction was performed with 3 eq. oxidant. <sup>c</sup> Reaction was performed with 1 and 2 eq. oxidant. <sup>d</sup> Reaction was performed with 20 mg silica <sup>e</sup> Conversions were determined by <sup>1</sup>H NMR spectroscopy based on **1**.

## Optimization of reaction conditions for the oxidation of **1** and subsequent reaction with phenylethylamine<sup>a</sup>

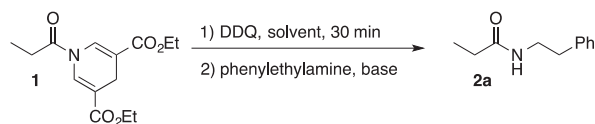

| Entry | Base                            | Amine (eq.) | Solvent           | Time (h) | Conversion (%) |
|-------|---------------------------------|-------------|-------------------|----------|----------------|
| 1     | -                               | 3           | CDCl <sub>3</sub> | 17       | 72             |
| 2     | DIPEA                           | 3           | CDCl <sub>3</sub> | 2        | 47             |
| 3     | 2,6-Lutidine                    | 3           | CDCl <sub>3</sub> | 2        | 65             |
| 4     | Pyridine                        | 3           | CDCl <sub>3</sub> | 2        | 75             |
| 5     | K <sub>2</sub> CO <sub>3</sub>  | 3           | CDCl <sub>3</sub> | 2        | 77             |
| 6     | Cs <sub>2</sub> CO <sub>3</sub> | 3           | CDCl <sub>3</sub> | 2        | 100 (50)       |
| 7     | DMAP                            | 3           | CDCl <sub>3</sub> | 1        | 100 (86)       |
| 8     | DMAP                            | 3           | DCM               | 1        | 100 (87)       |
| 9     | DMAP                            | 3           | EtOAc             | 26       | (44)           |
| 10    | DMAP                            | 3           | Dioxane           | 26       | (65)           |
| 11    | DMAP (0.2 eq.)                  | 3           | DCM               | 4        | (84)           |
| 12    | DMAP (1 eq.)                    | 3           | DCM               | 1.5      | (94)           |
| 13    | DMAP (1 eq.)                    | 1           | DCM               | 6        | (83)           |
| 14    | DMAP (3 eq.)                    | 1.1         | DCM               | 1        | (90)           |

<sup>a</sup> Reaction conditions for entry 1-10: **1** (0.036 mmol) and DDQ (0.036 mmol) were stirred in 0.6 mL of solvent in a sealed vial (all reactions with isolated yields were performed on 0.18 mmol scale using 3.0 mL of solvent). After 30 minutes phenylethylamine (0.11 mmol) and base (0.11 mmol) were added. Reaction conditions for entry 11-14: **1** (0.18 mmol) and DDQ (0.18 mmol) were stirred in 3 mL DCM in a sealed vial (entry 14 was performed with DDQ (1 eq.) and **1** (1.1 eq.)). After 30 minutes phenylethylamine and base were added according to the table. <sup>b</sup> Conversions were determined by <sup>1</sup>H NMR spectroscopy based on **1**. Isolated yields are reported in paranthesis.

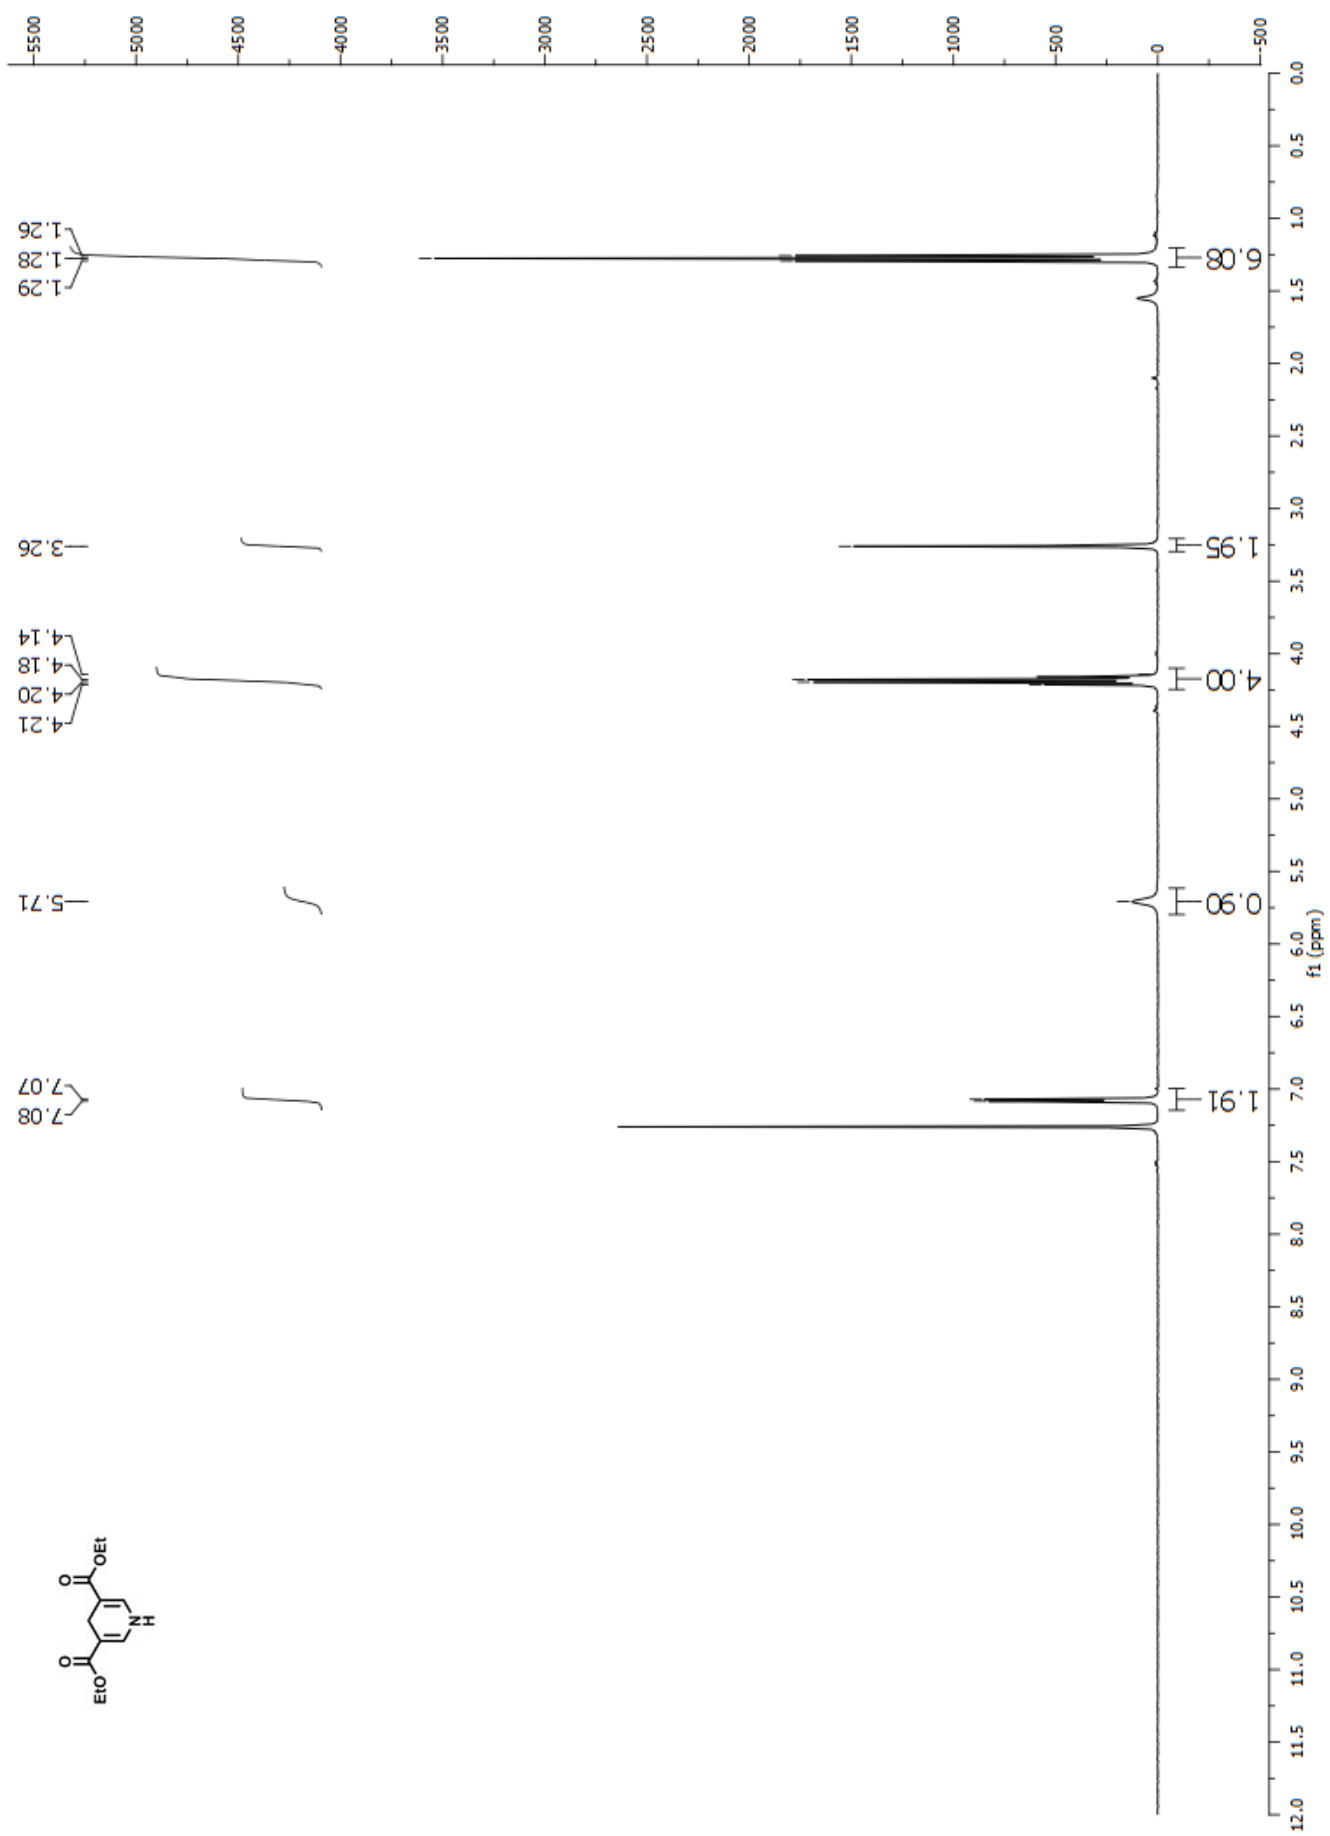

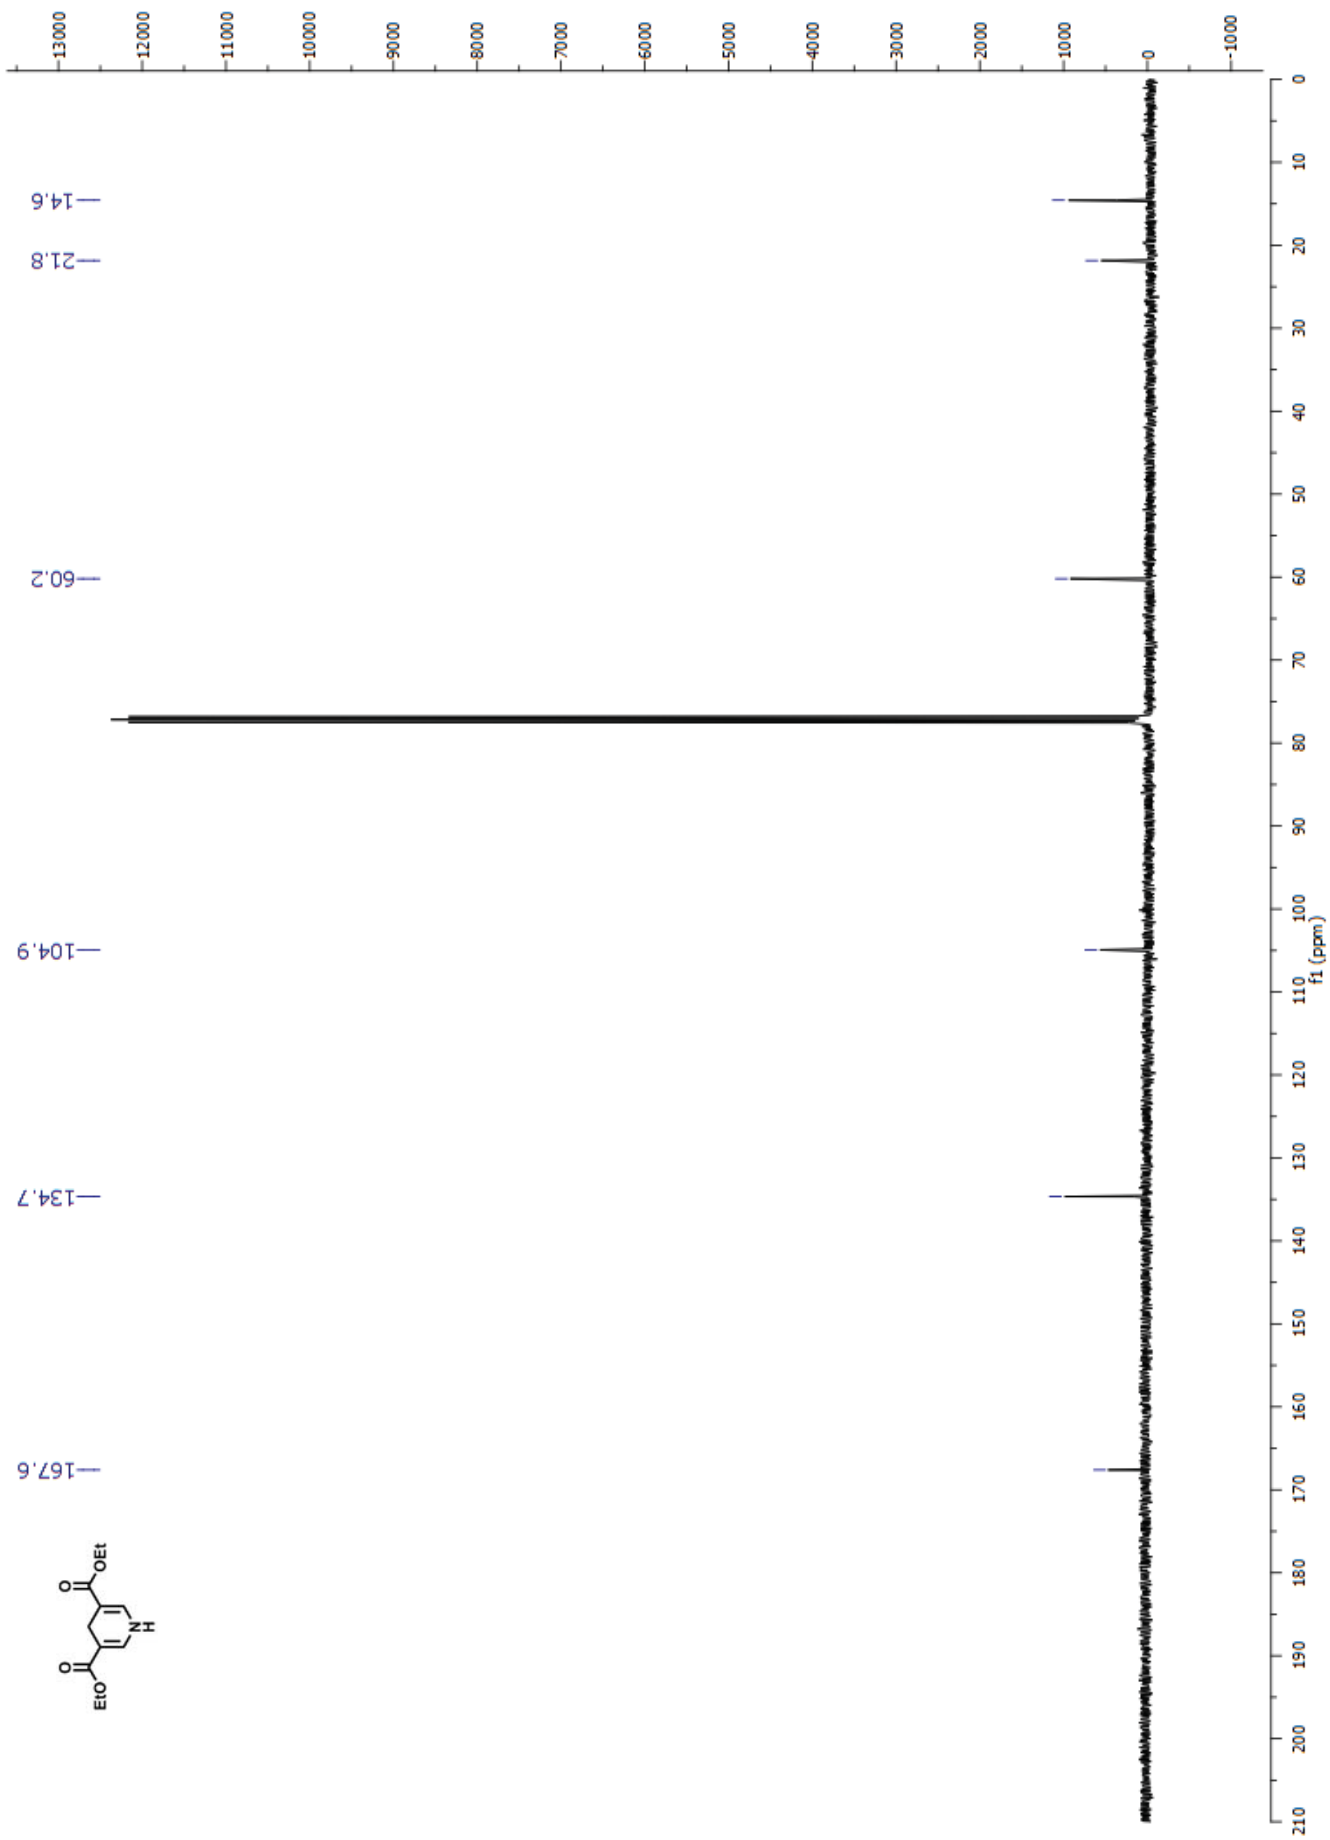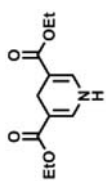

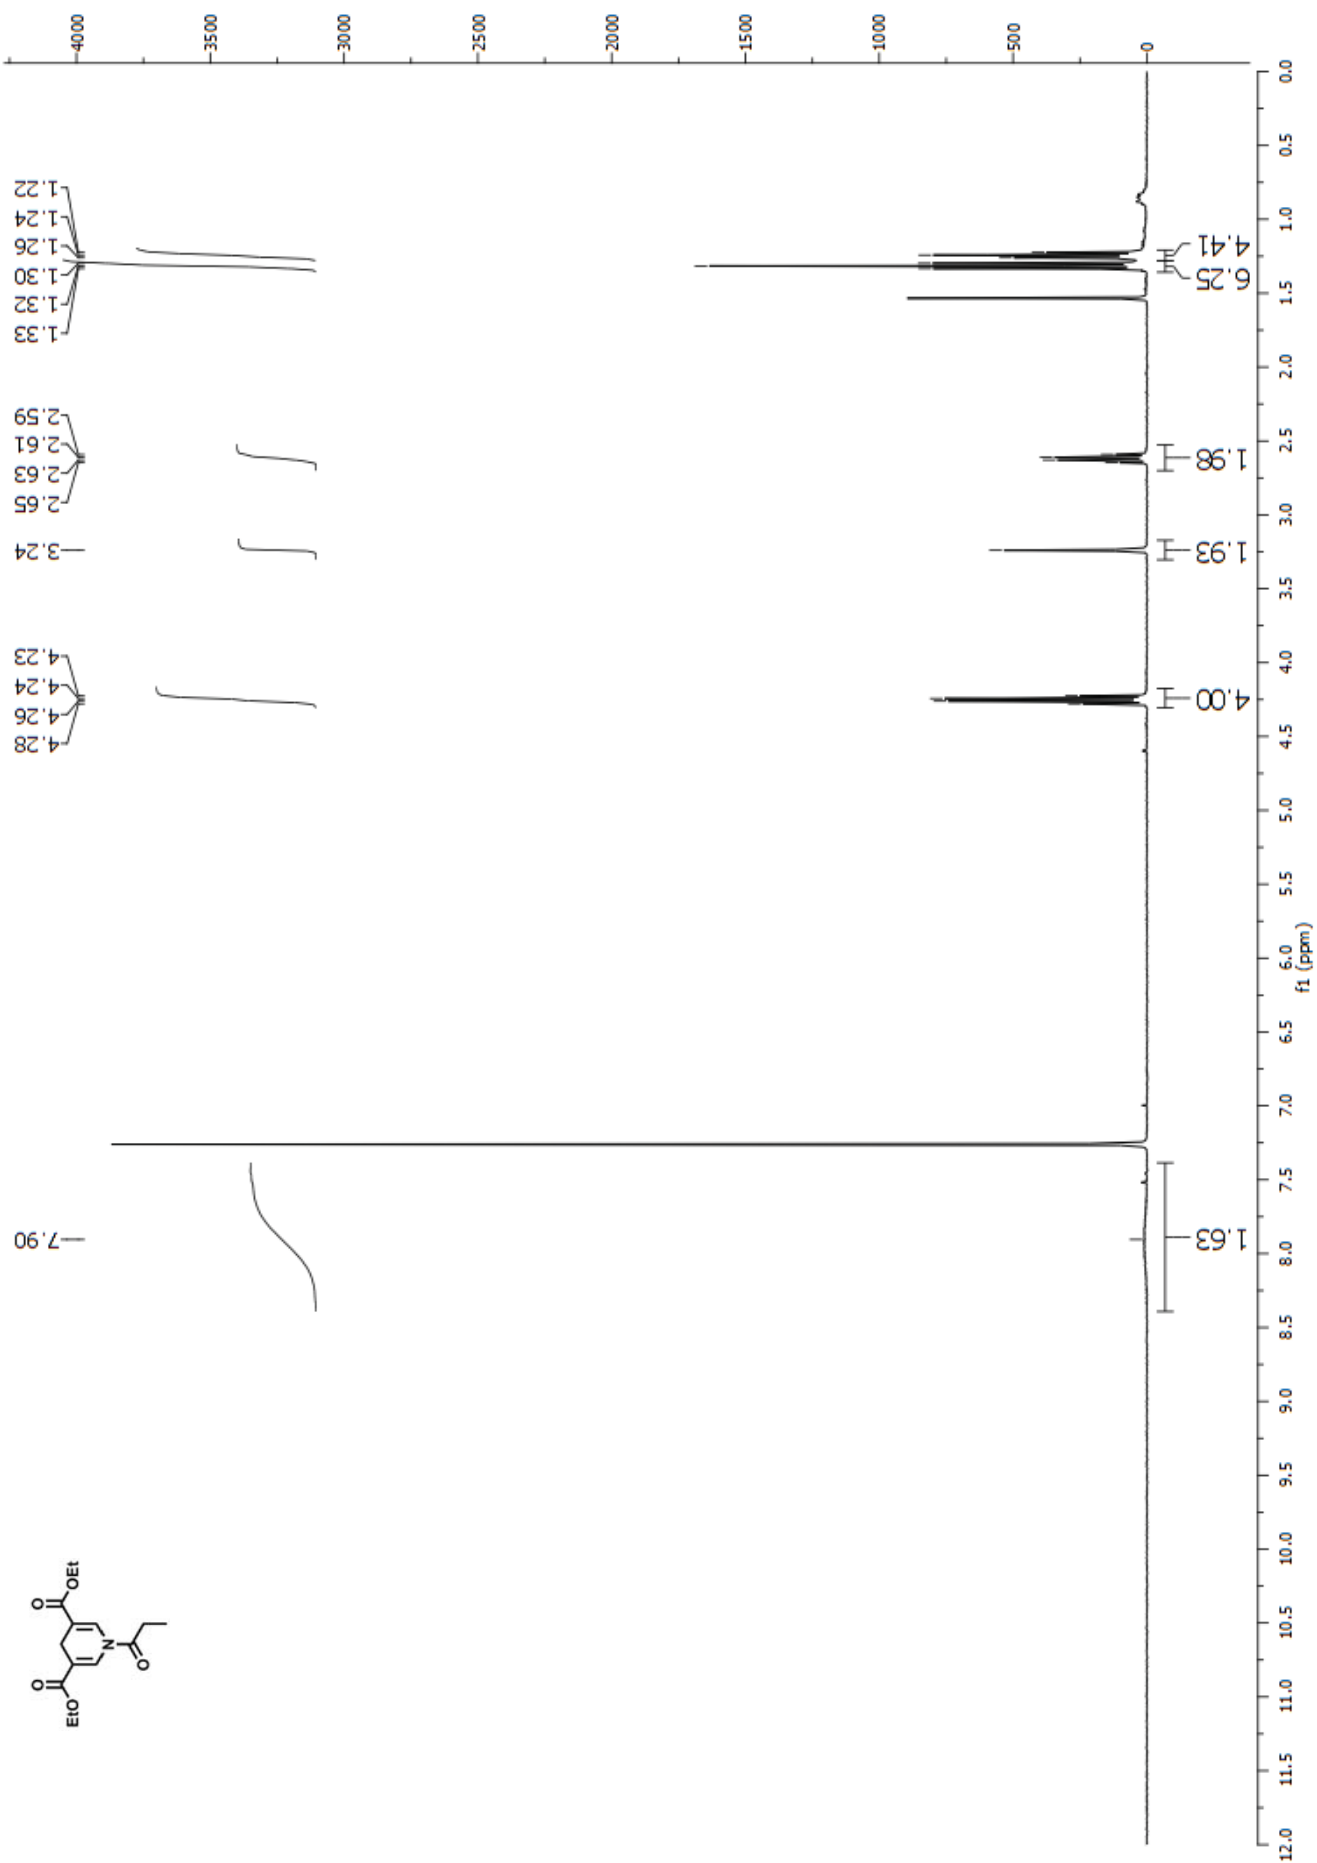

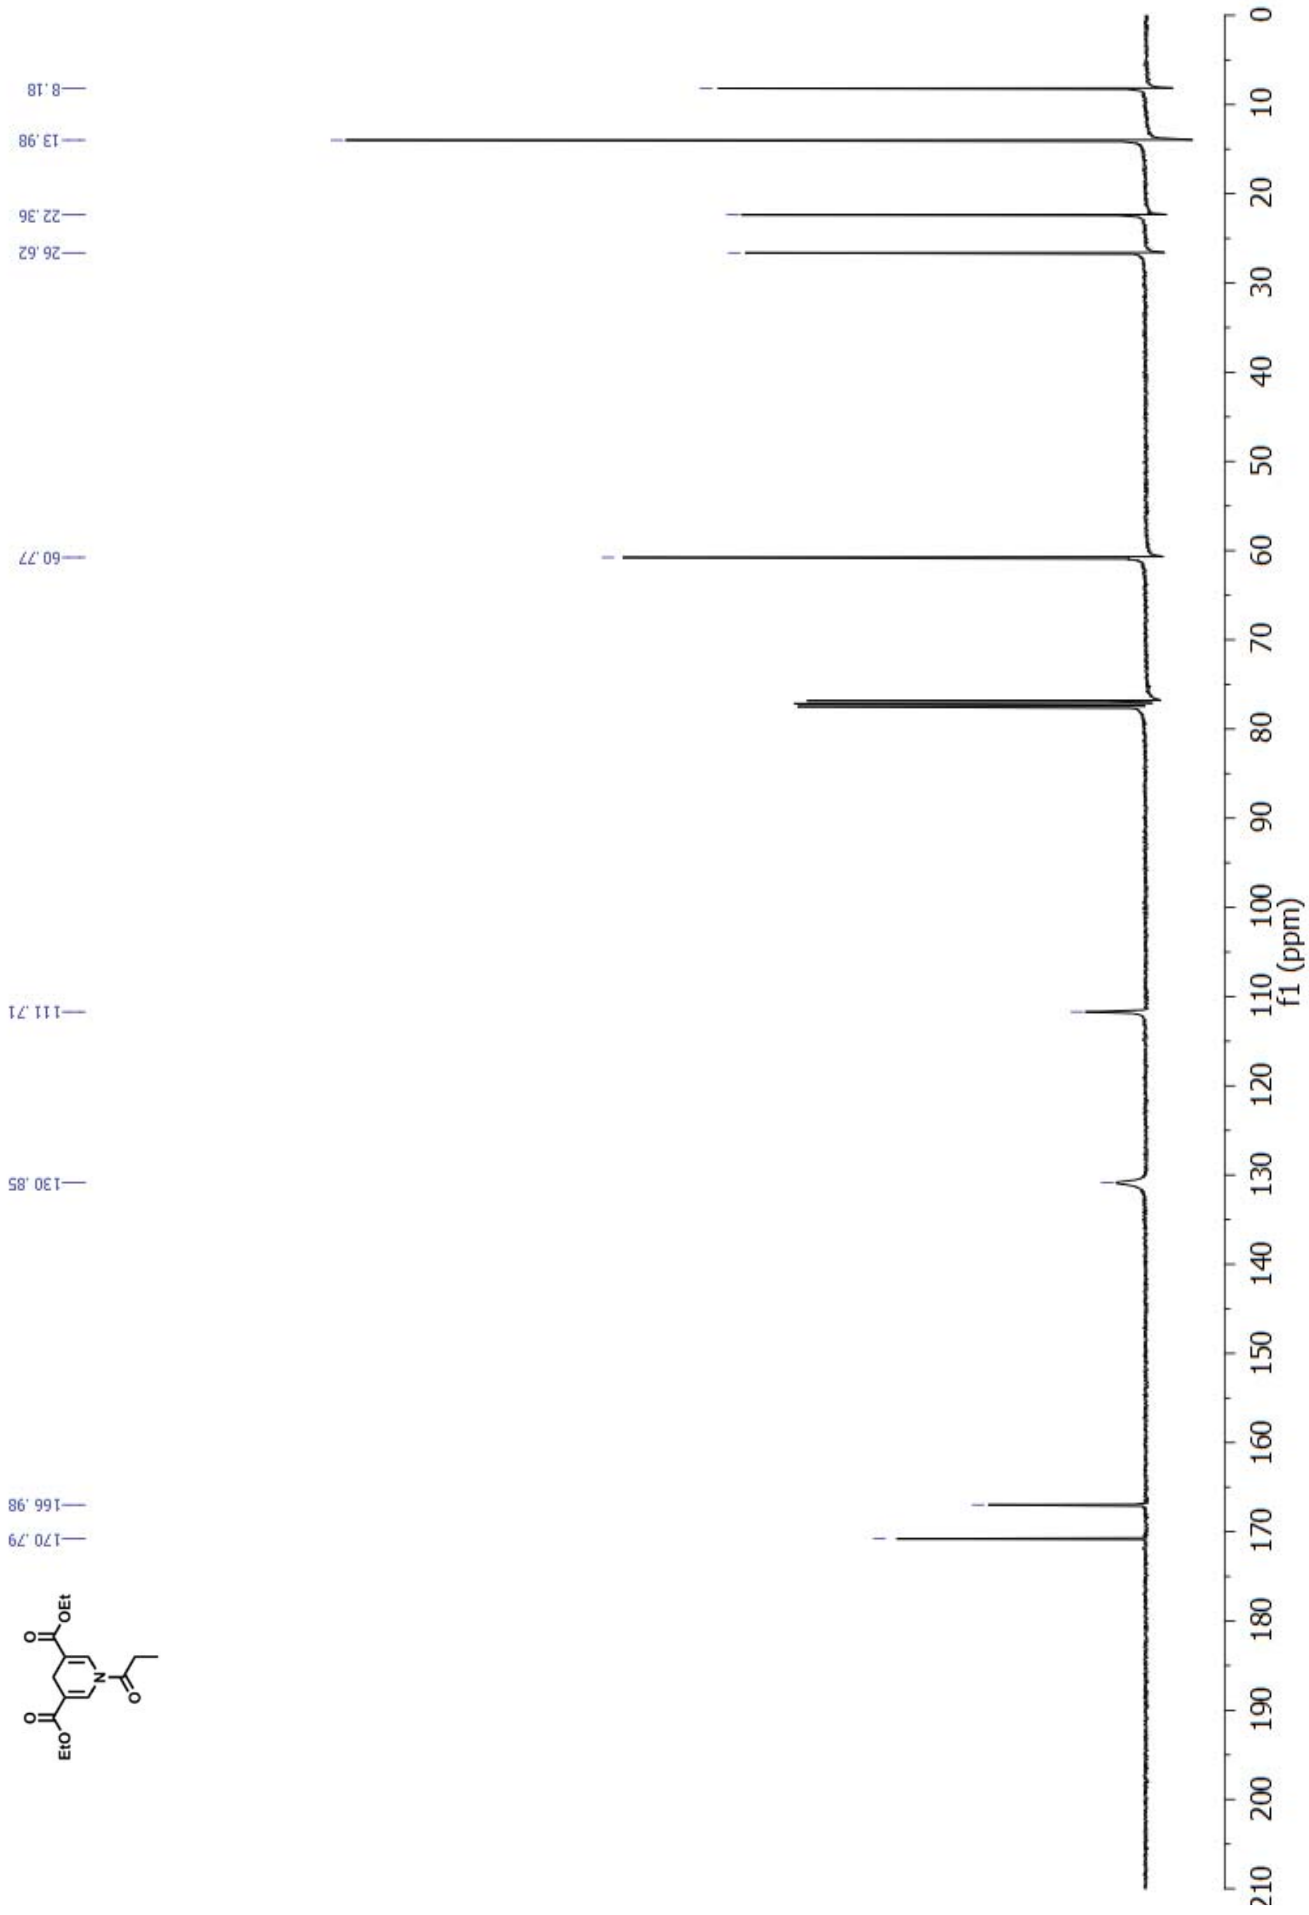

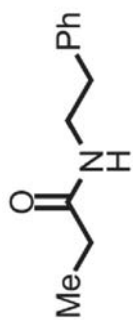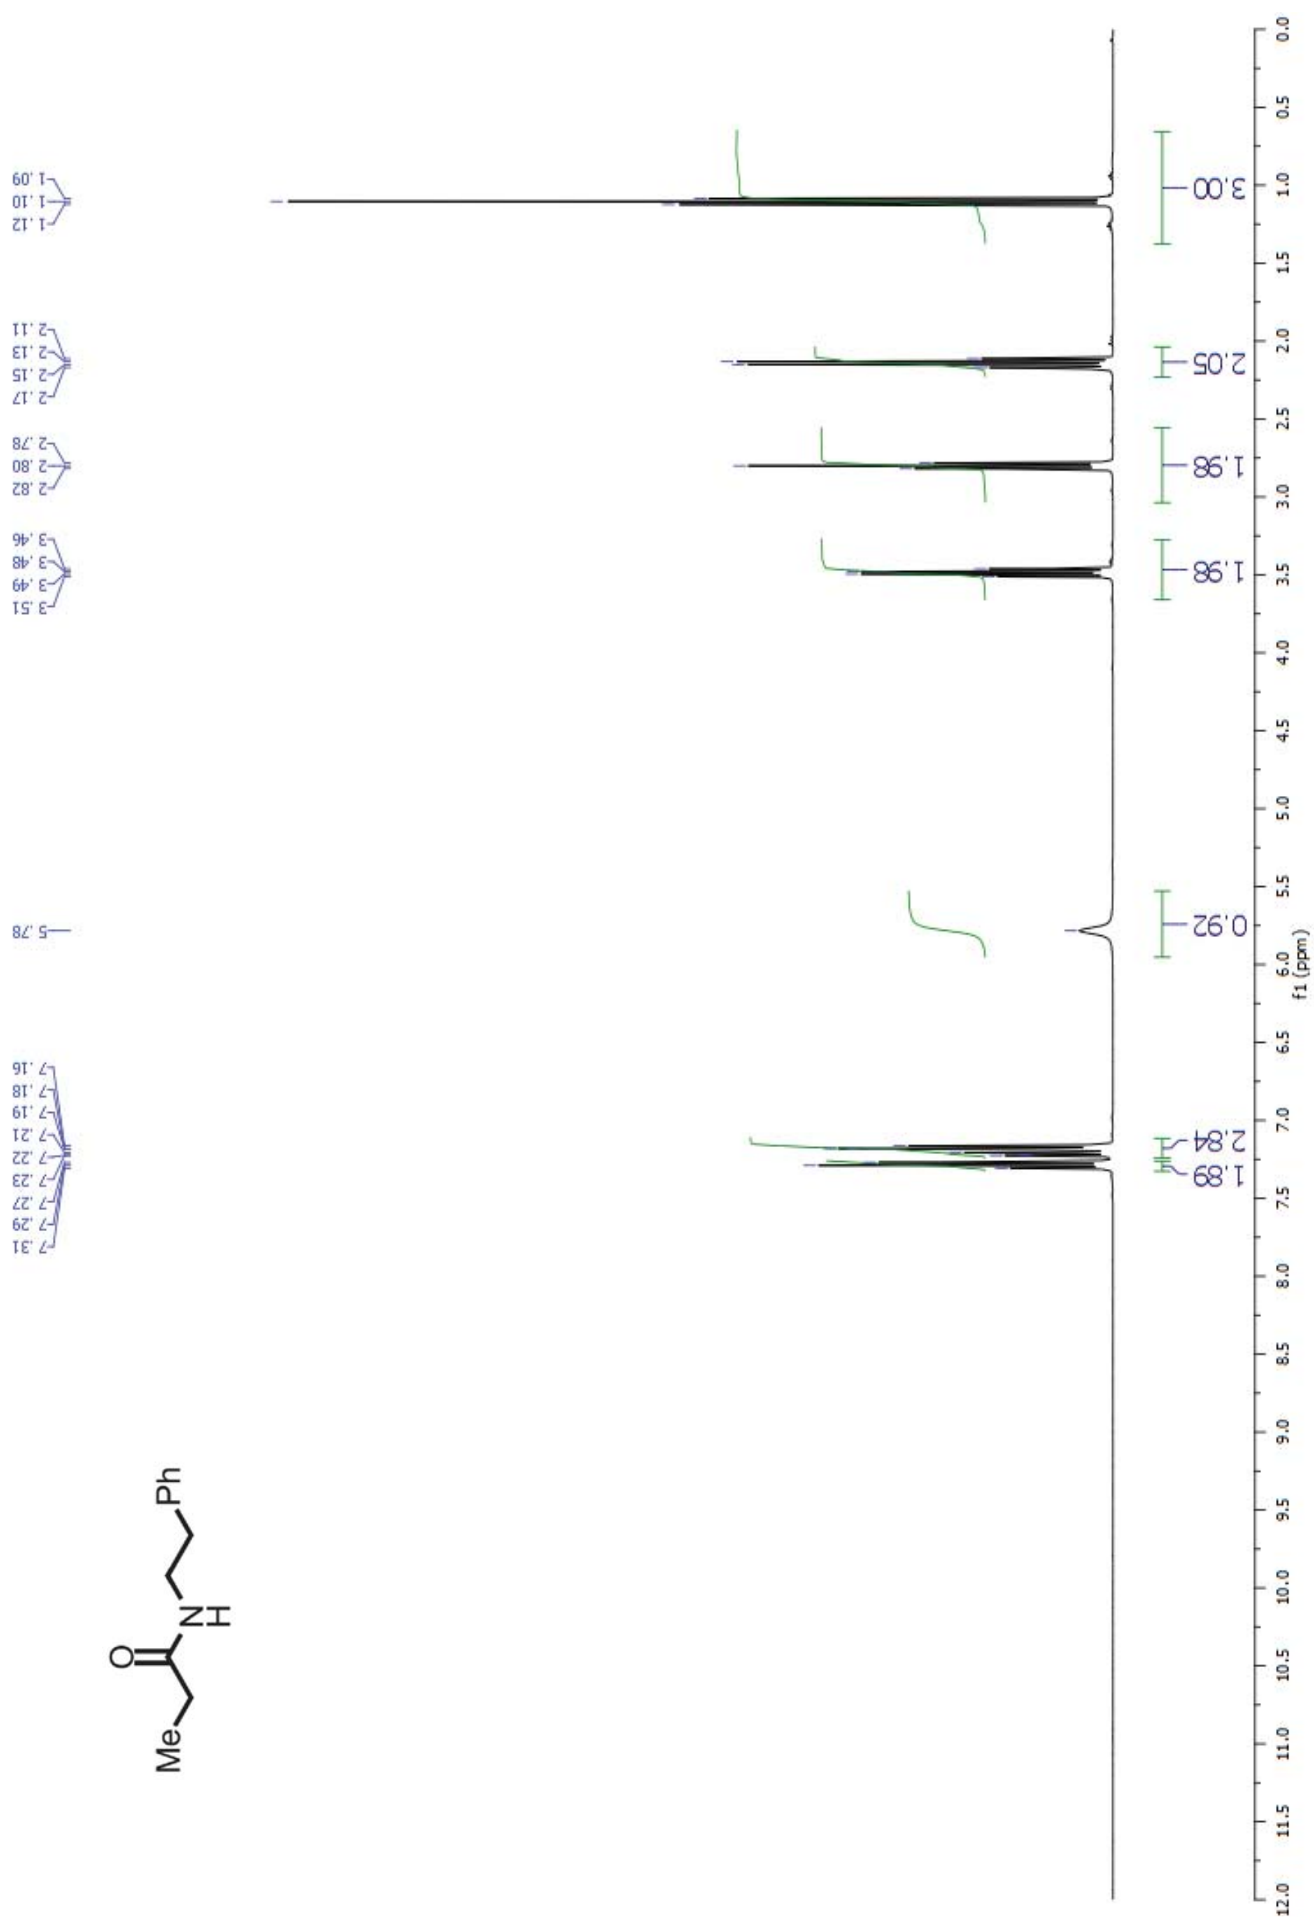

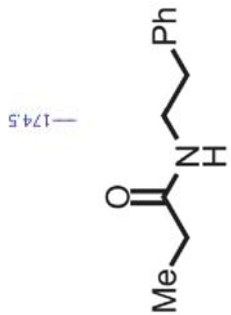

174.5

139.4

129.1  
128.9  
126.8

40.4

35.5

29.4

9.5

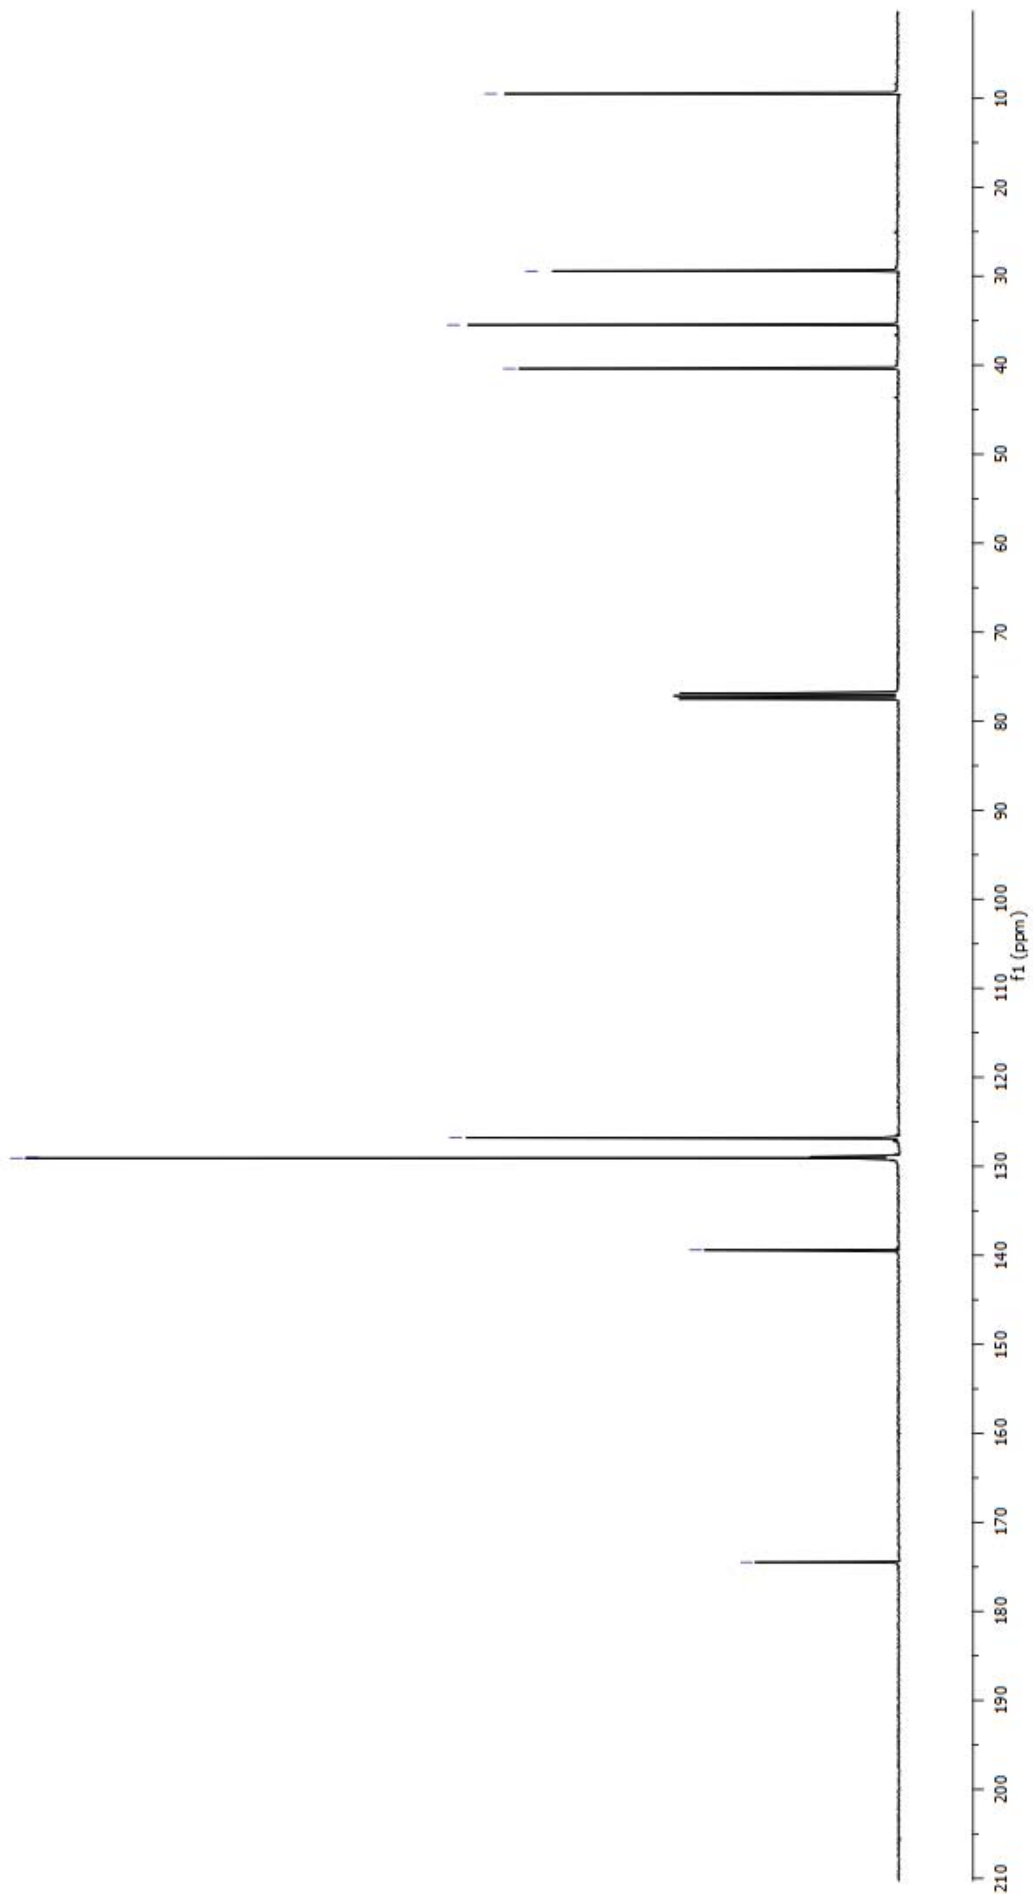

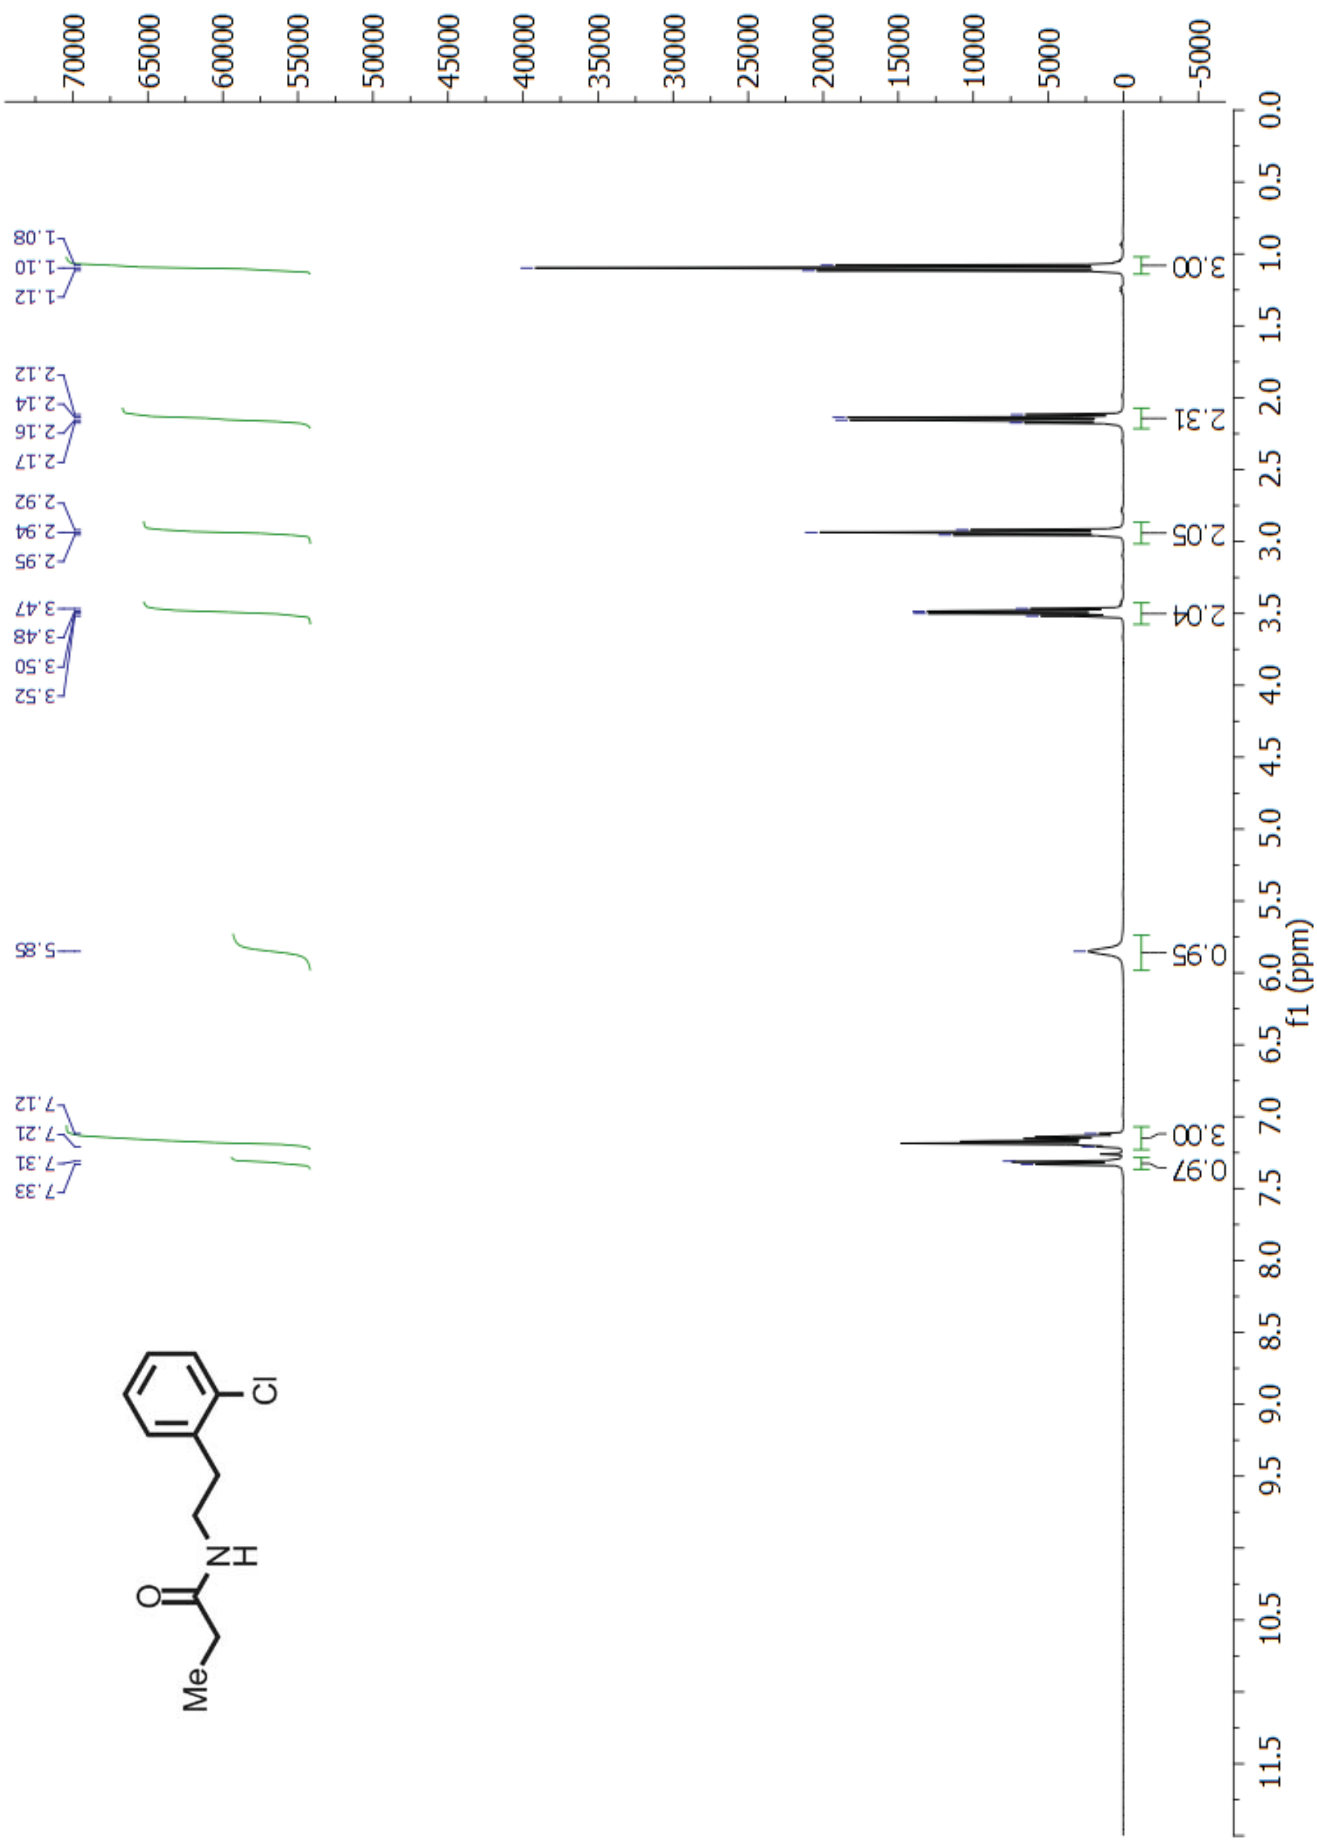

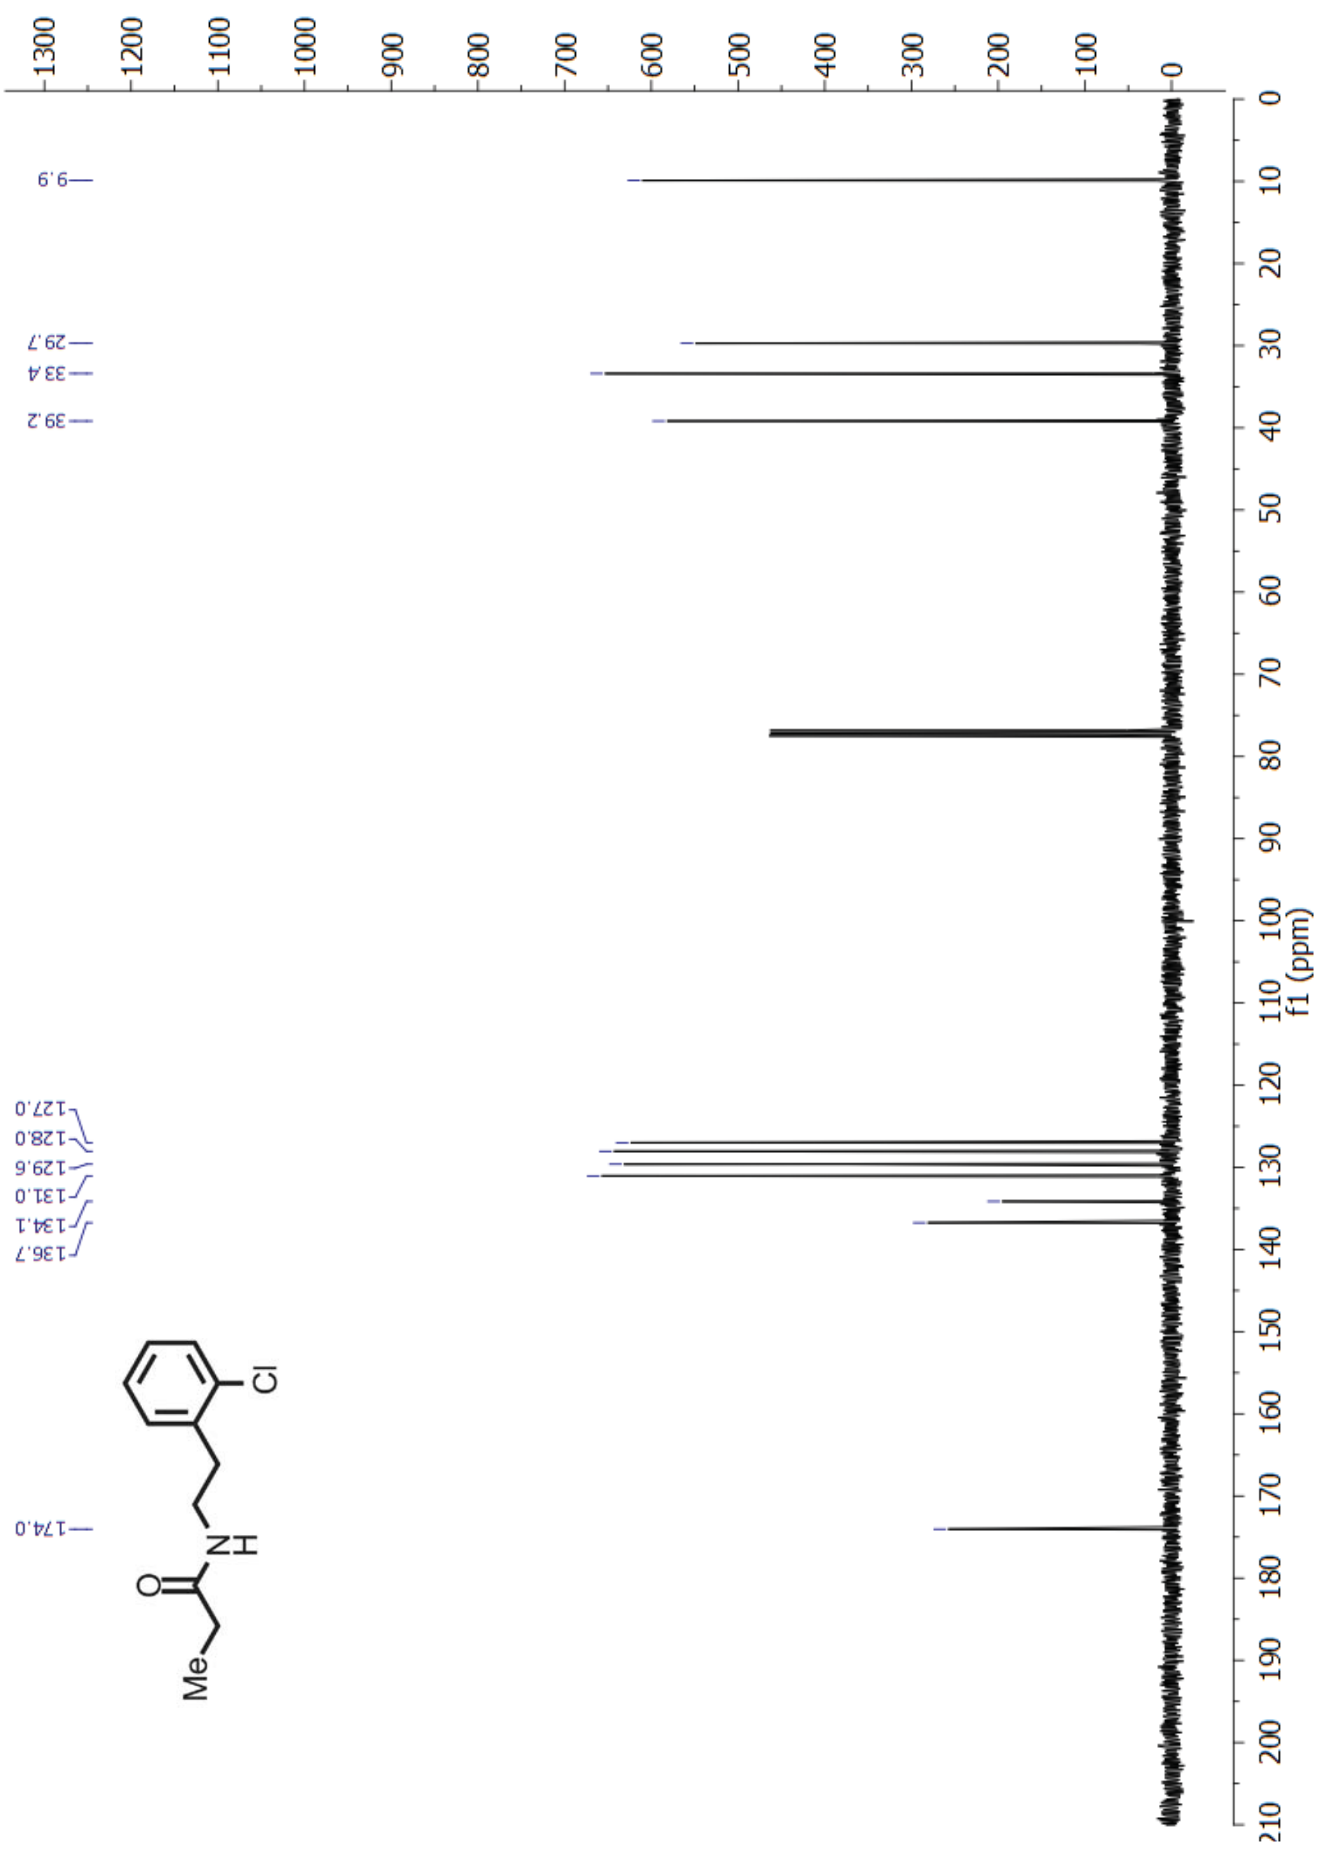

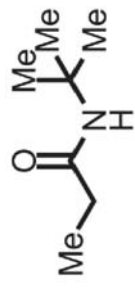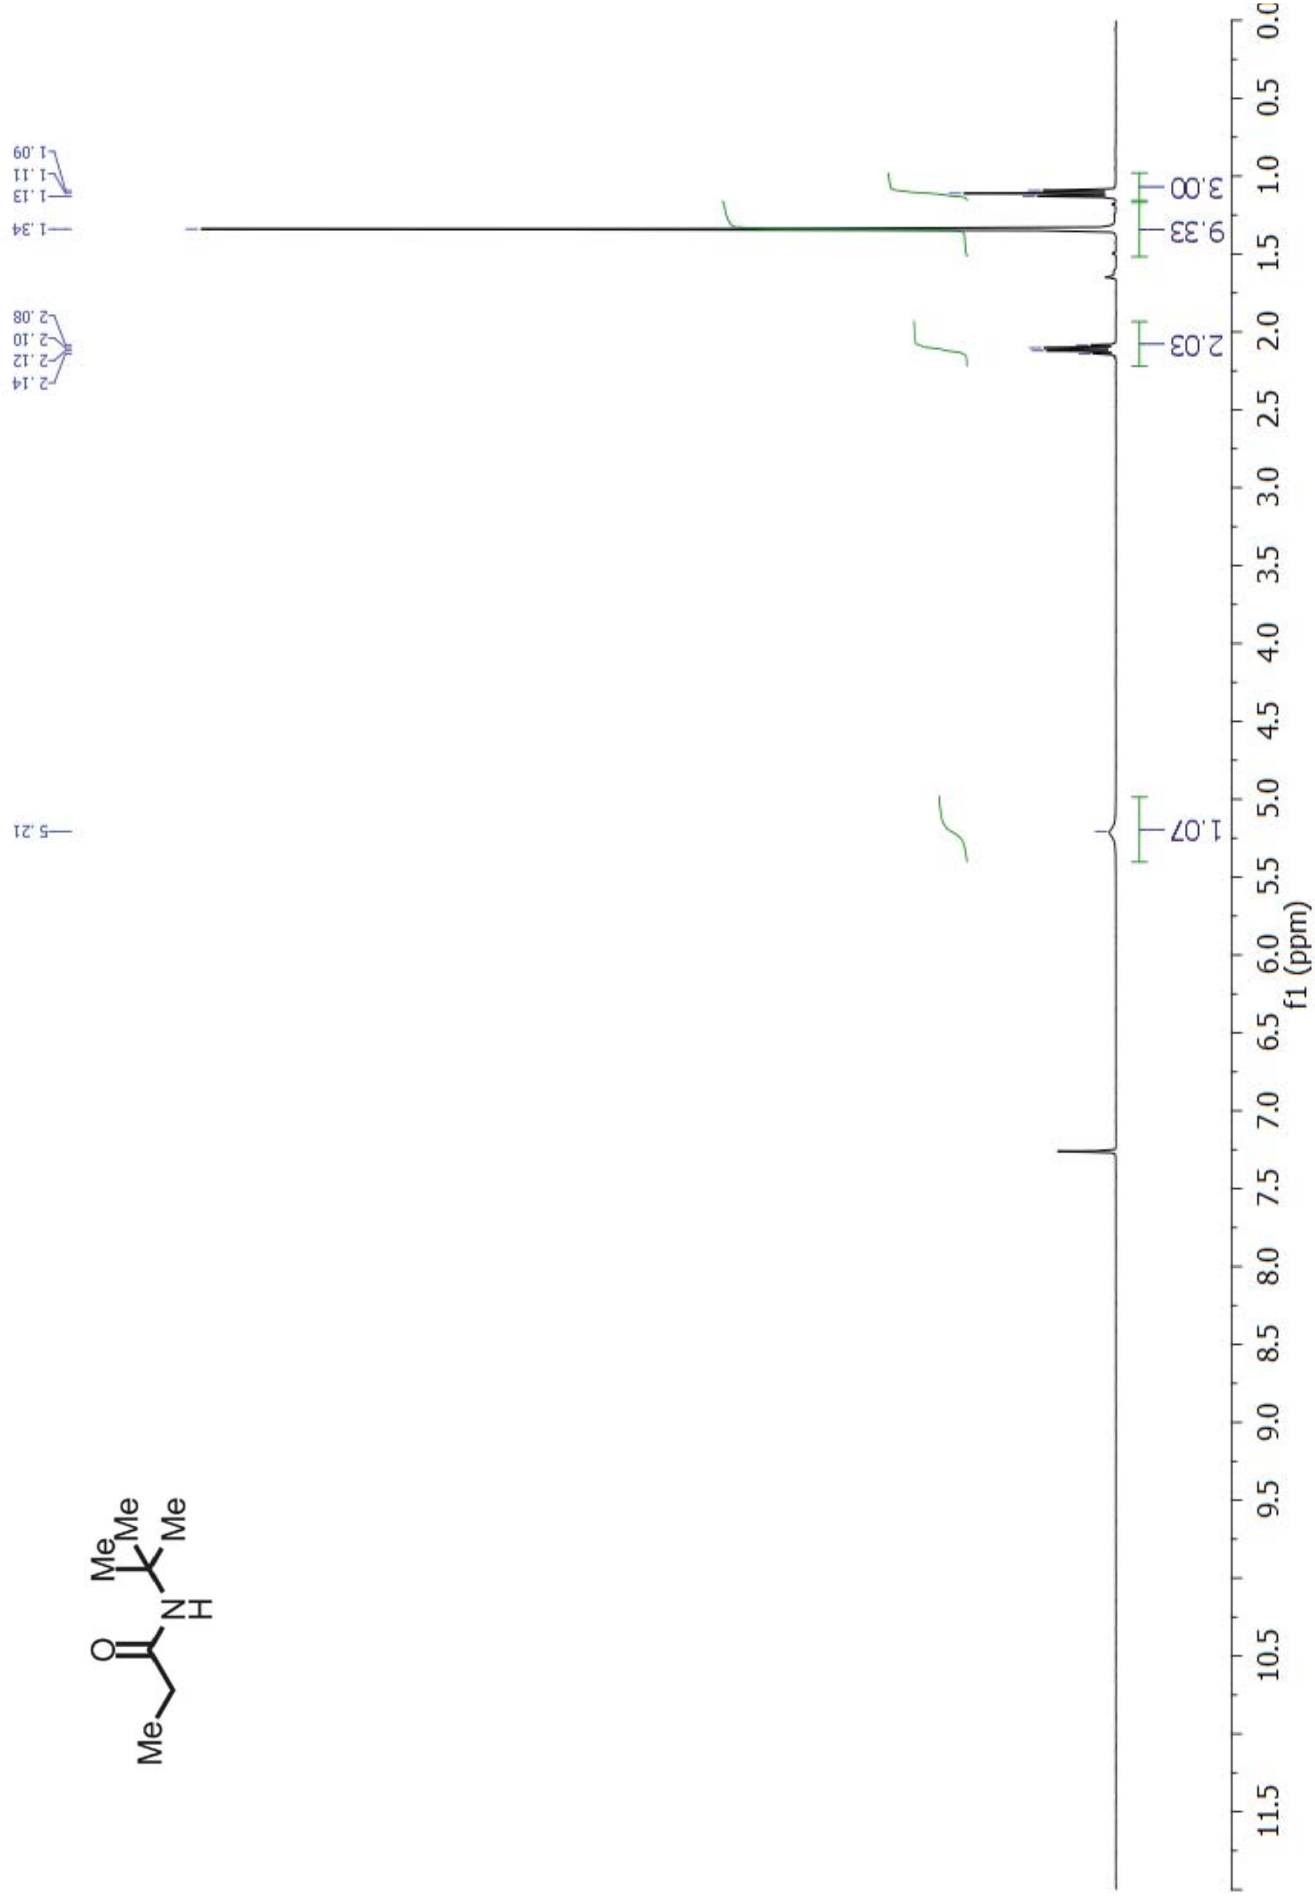

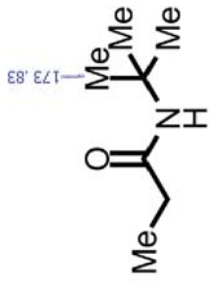

173.83

50.88

30.35  
28.63

9.53

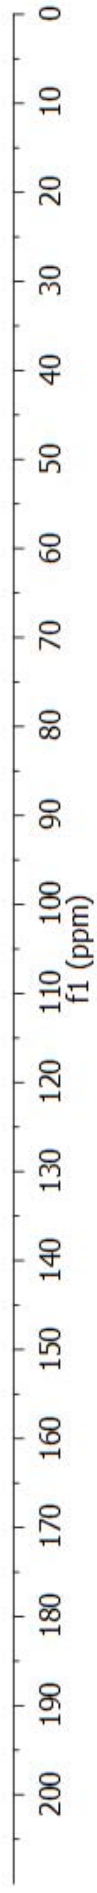

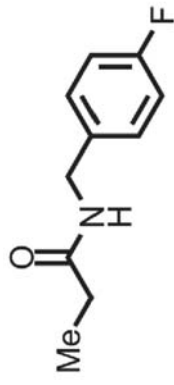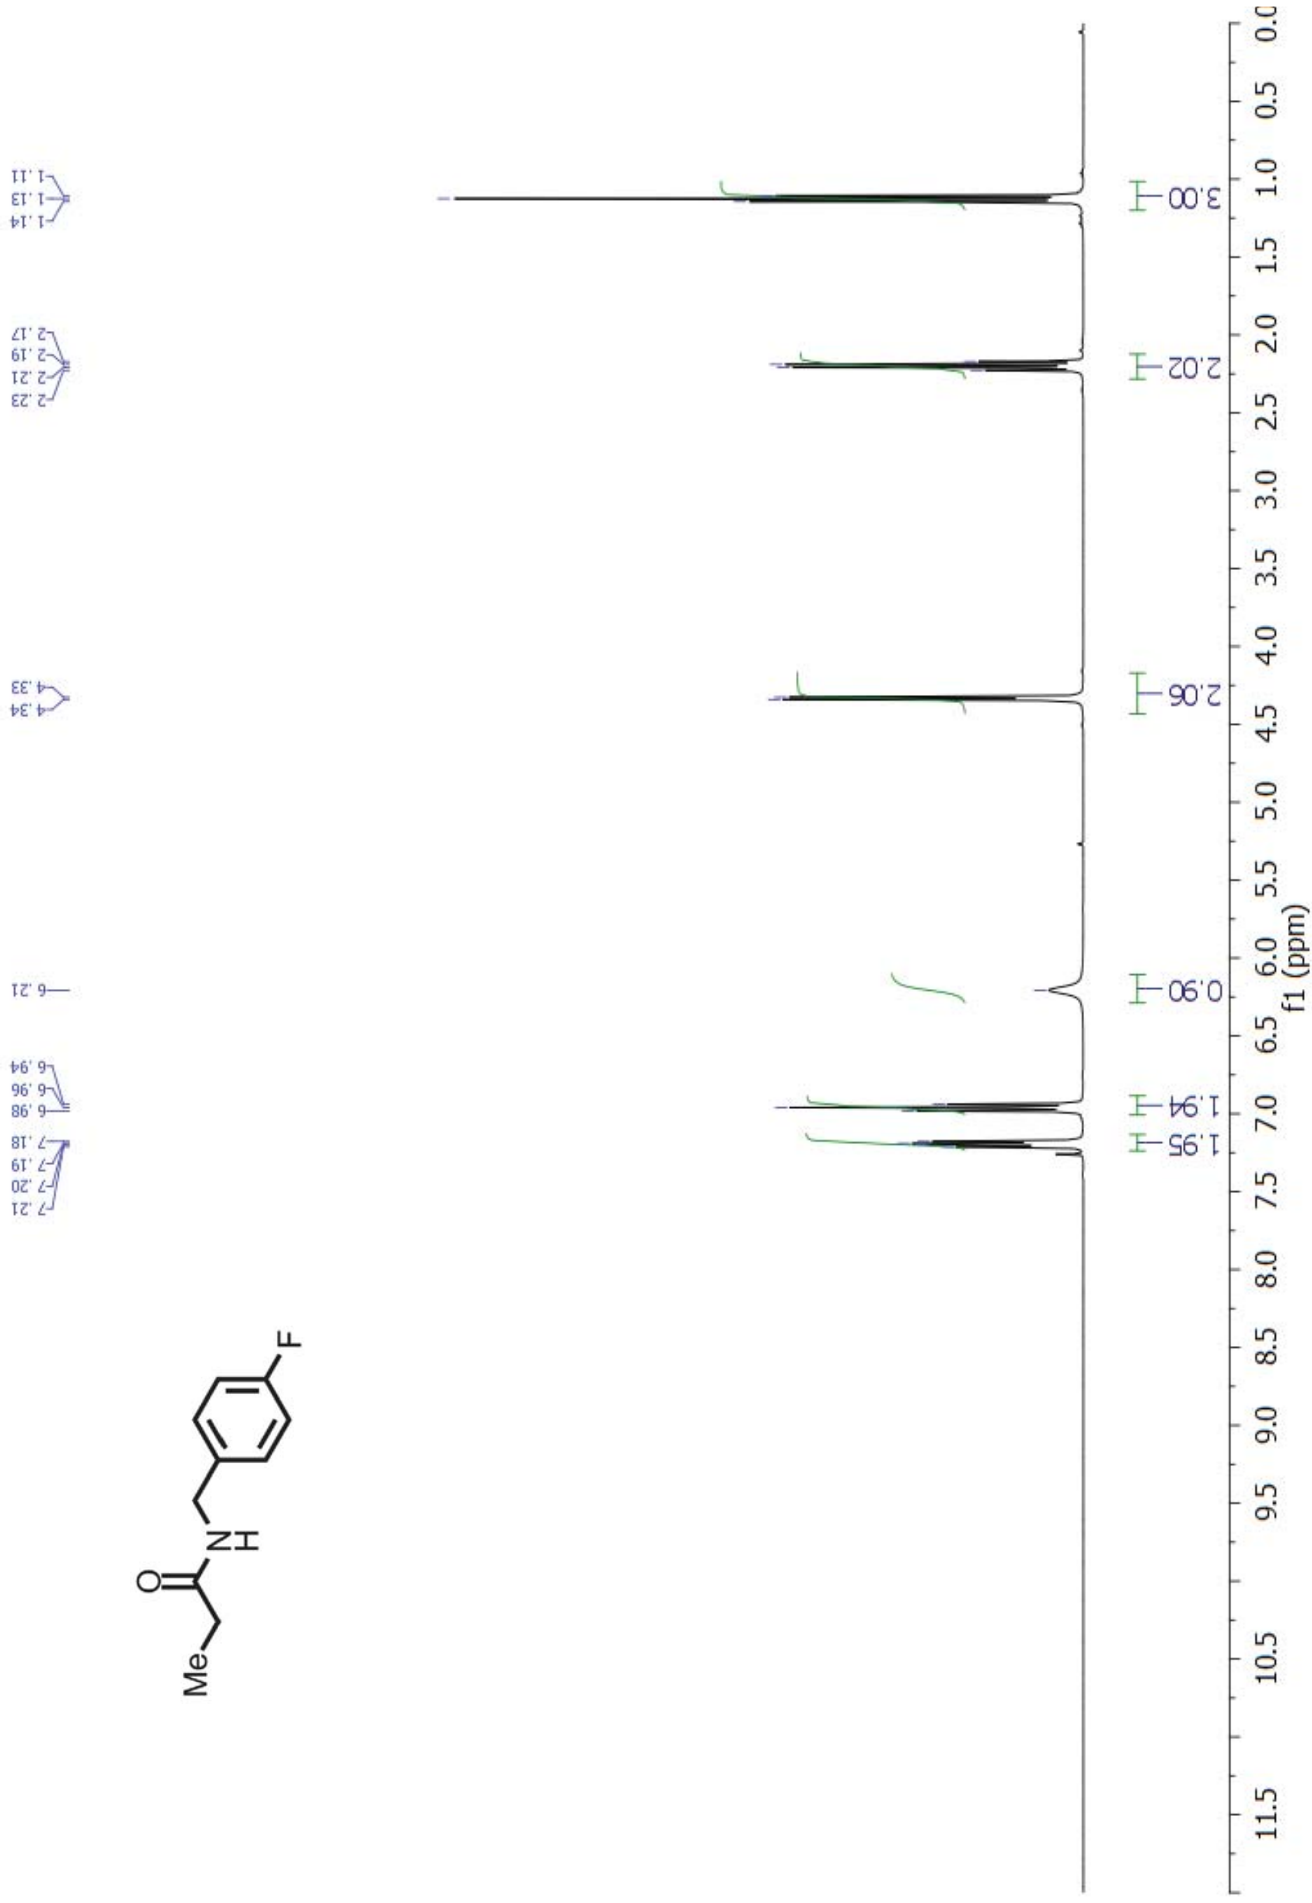

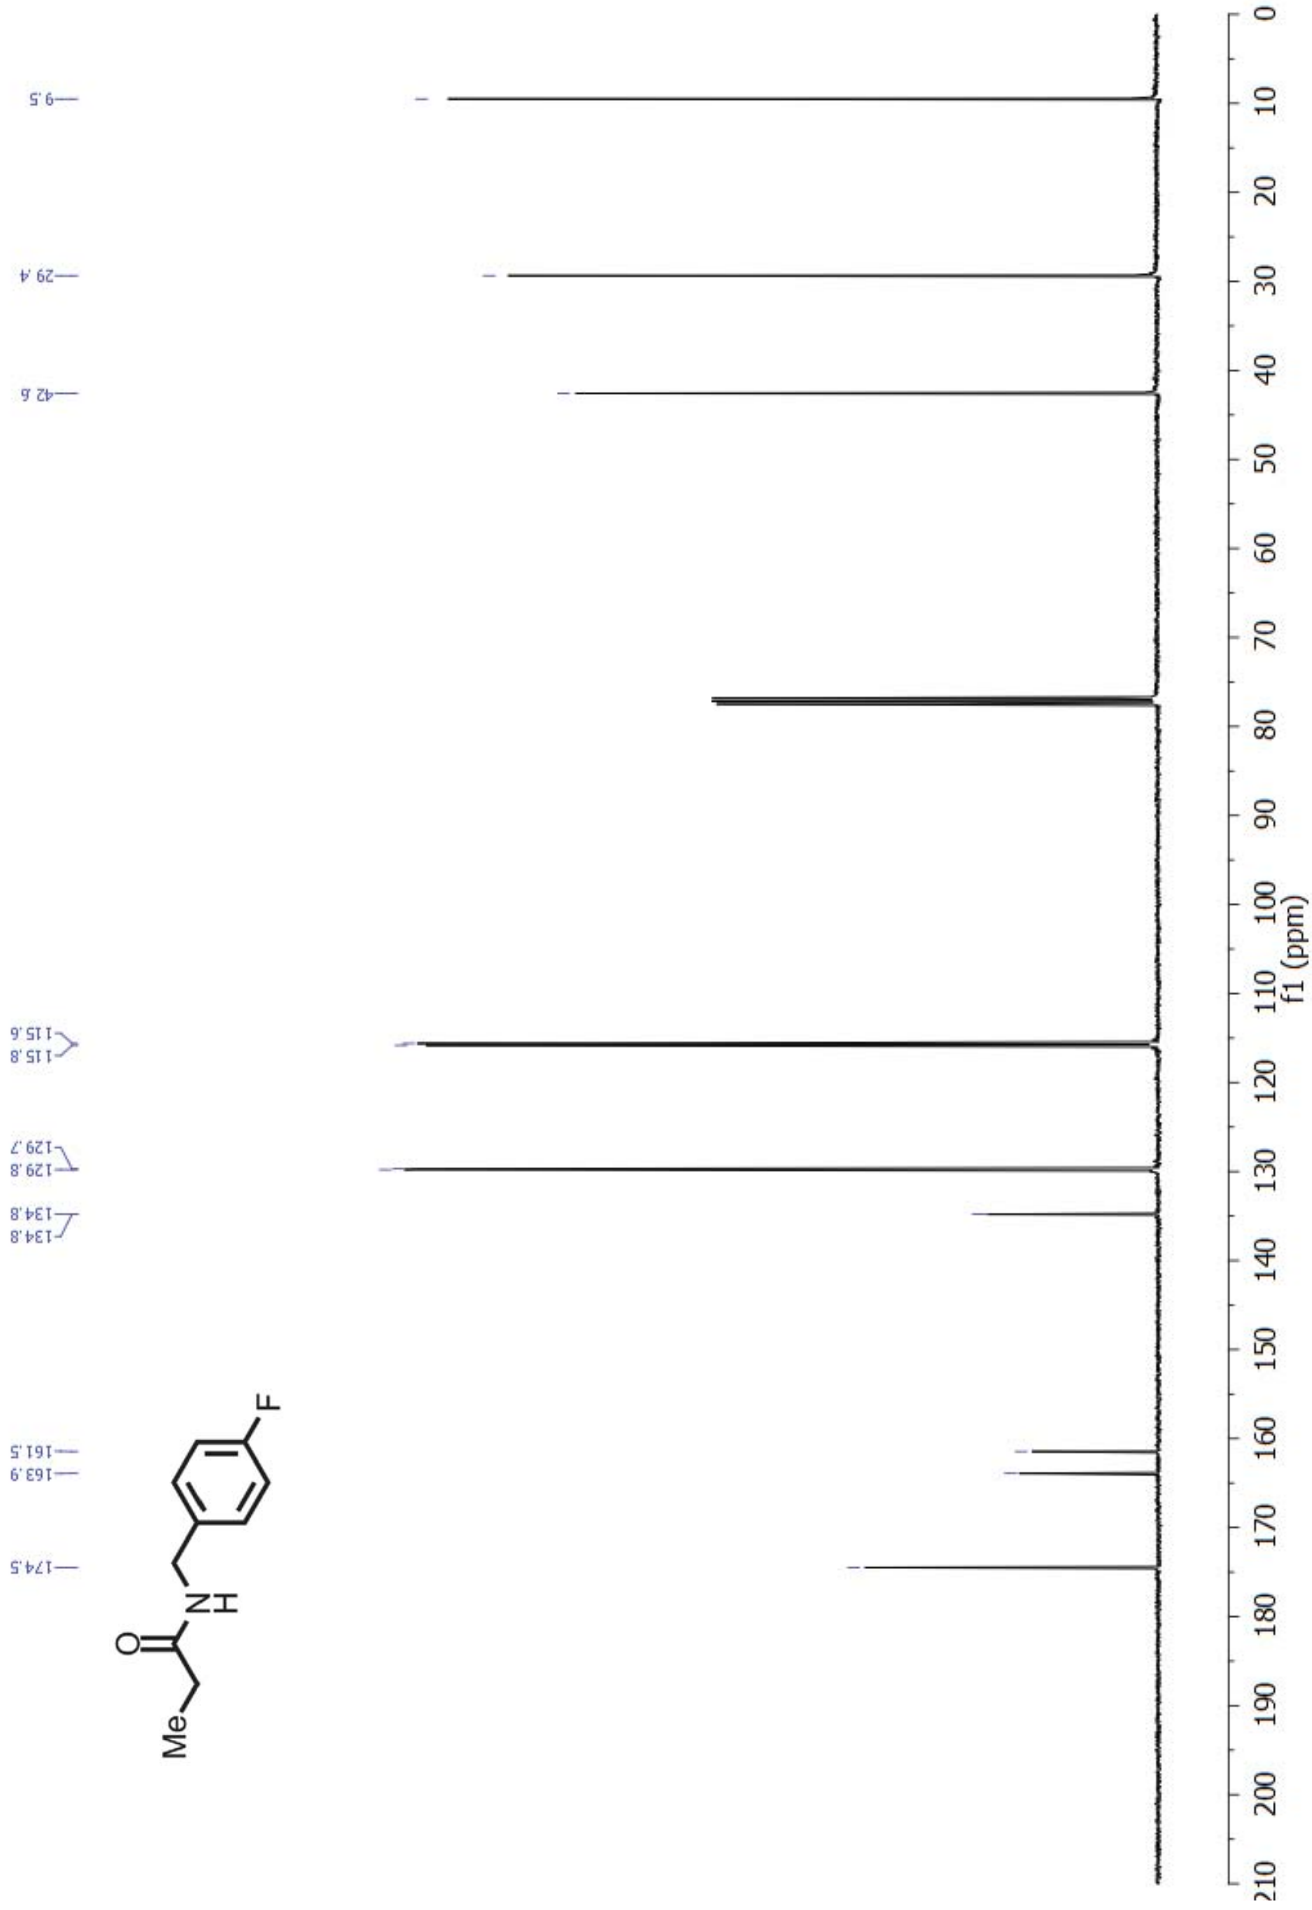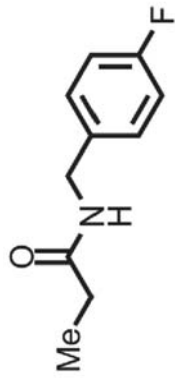

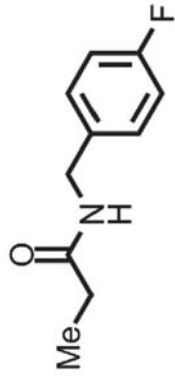

116.02

f1 (ppm)

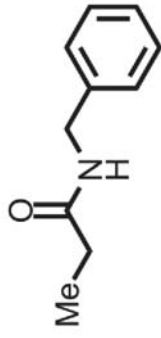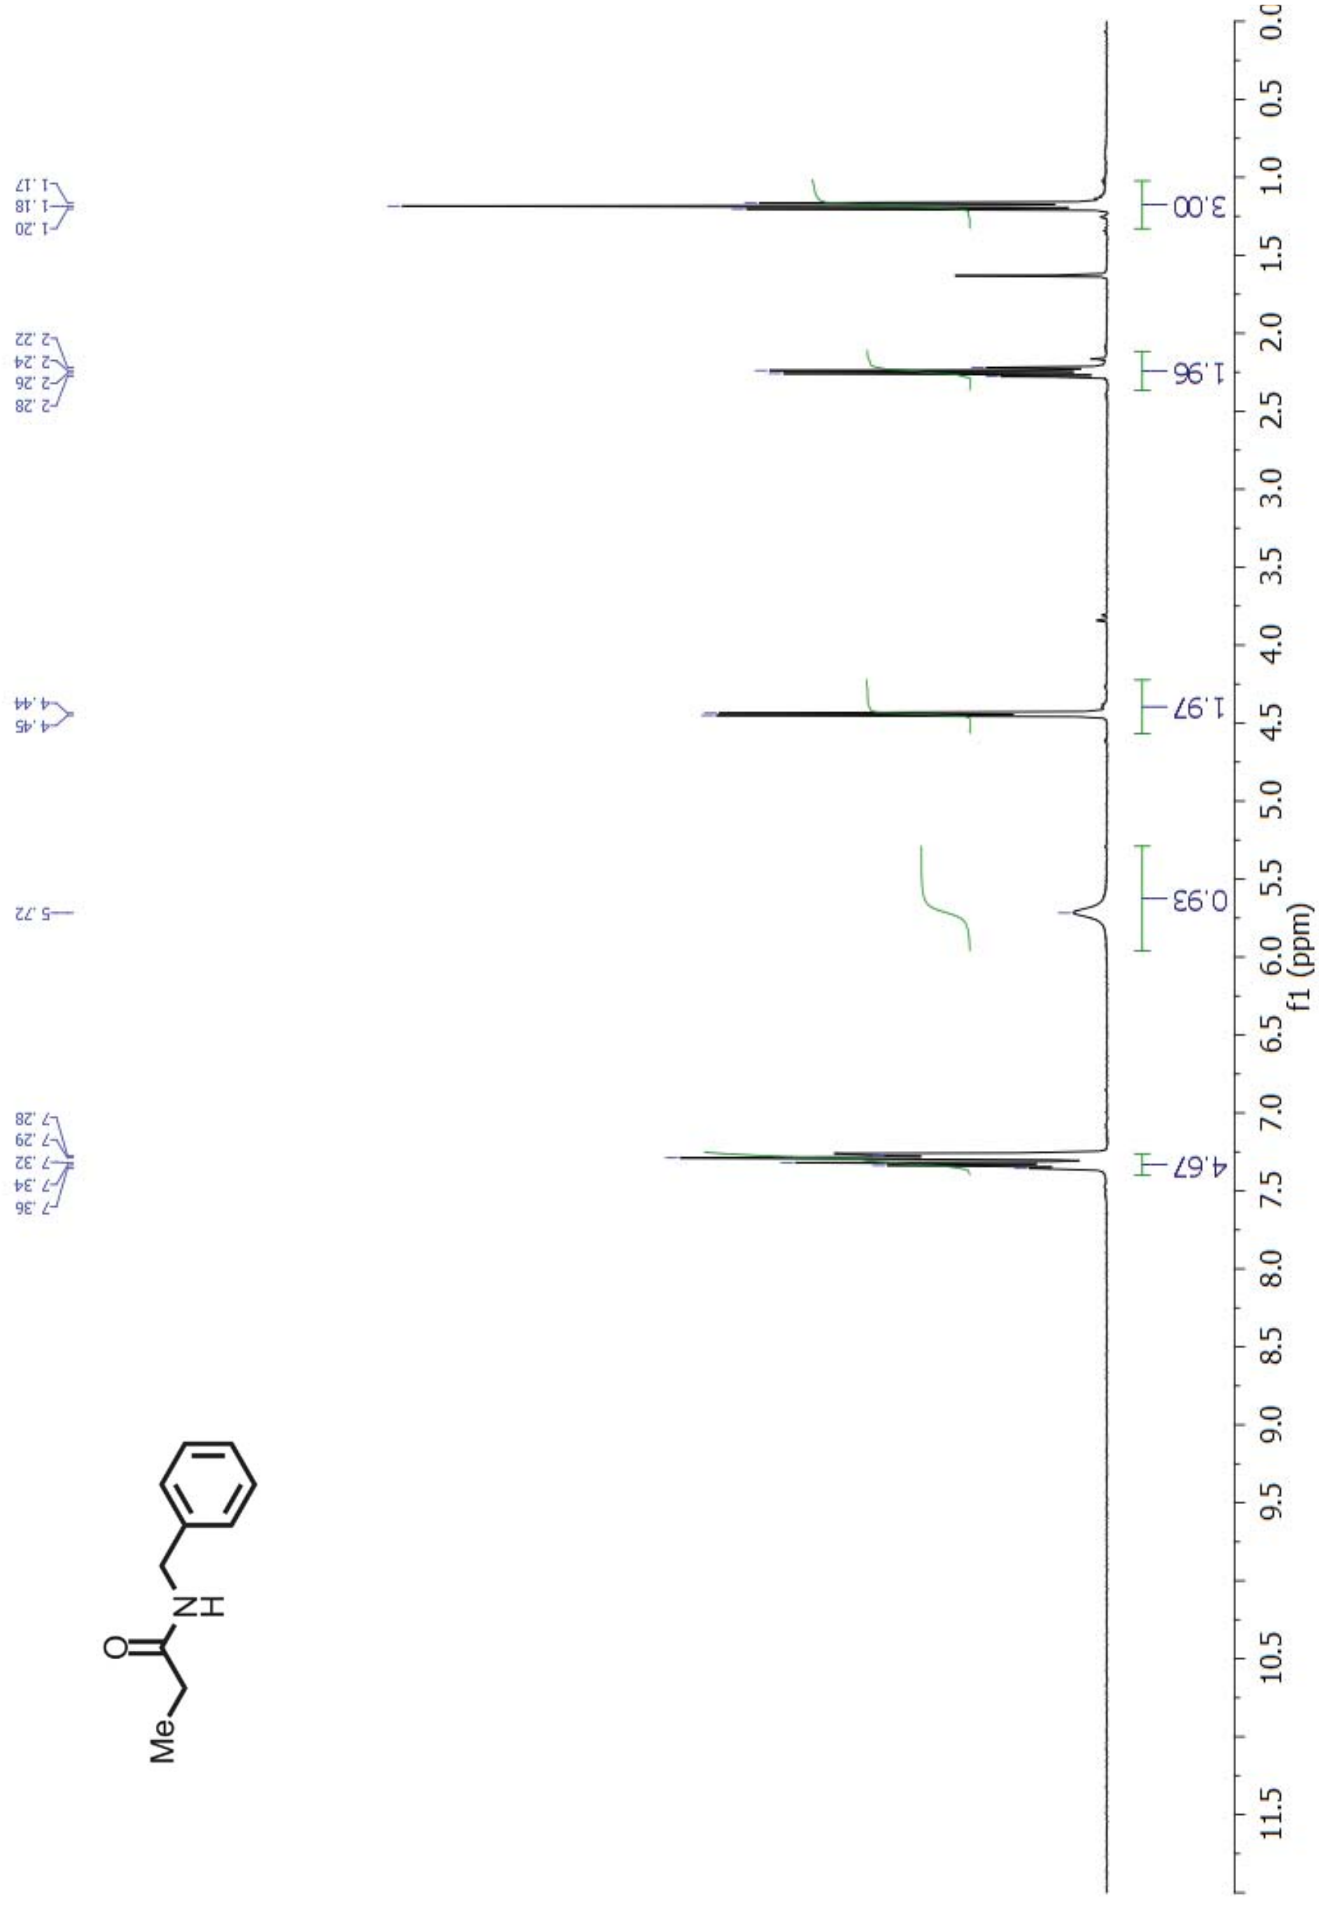

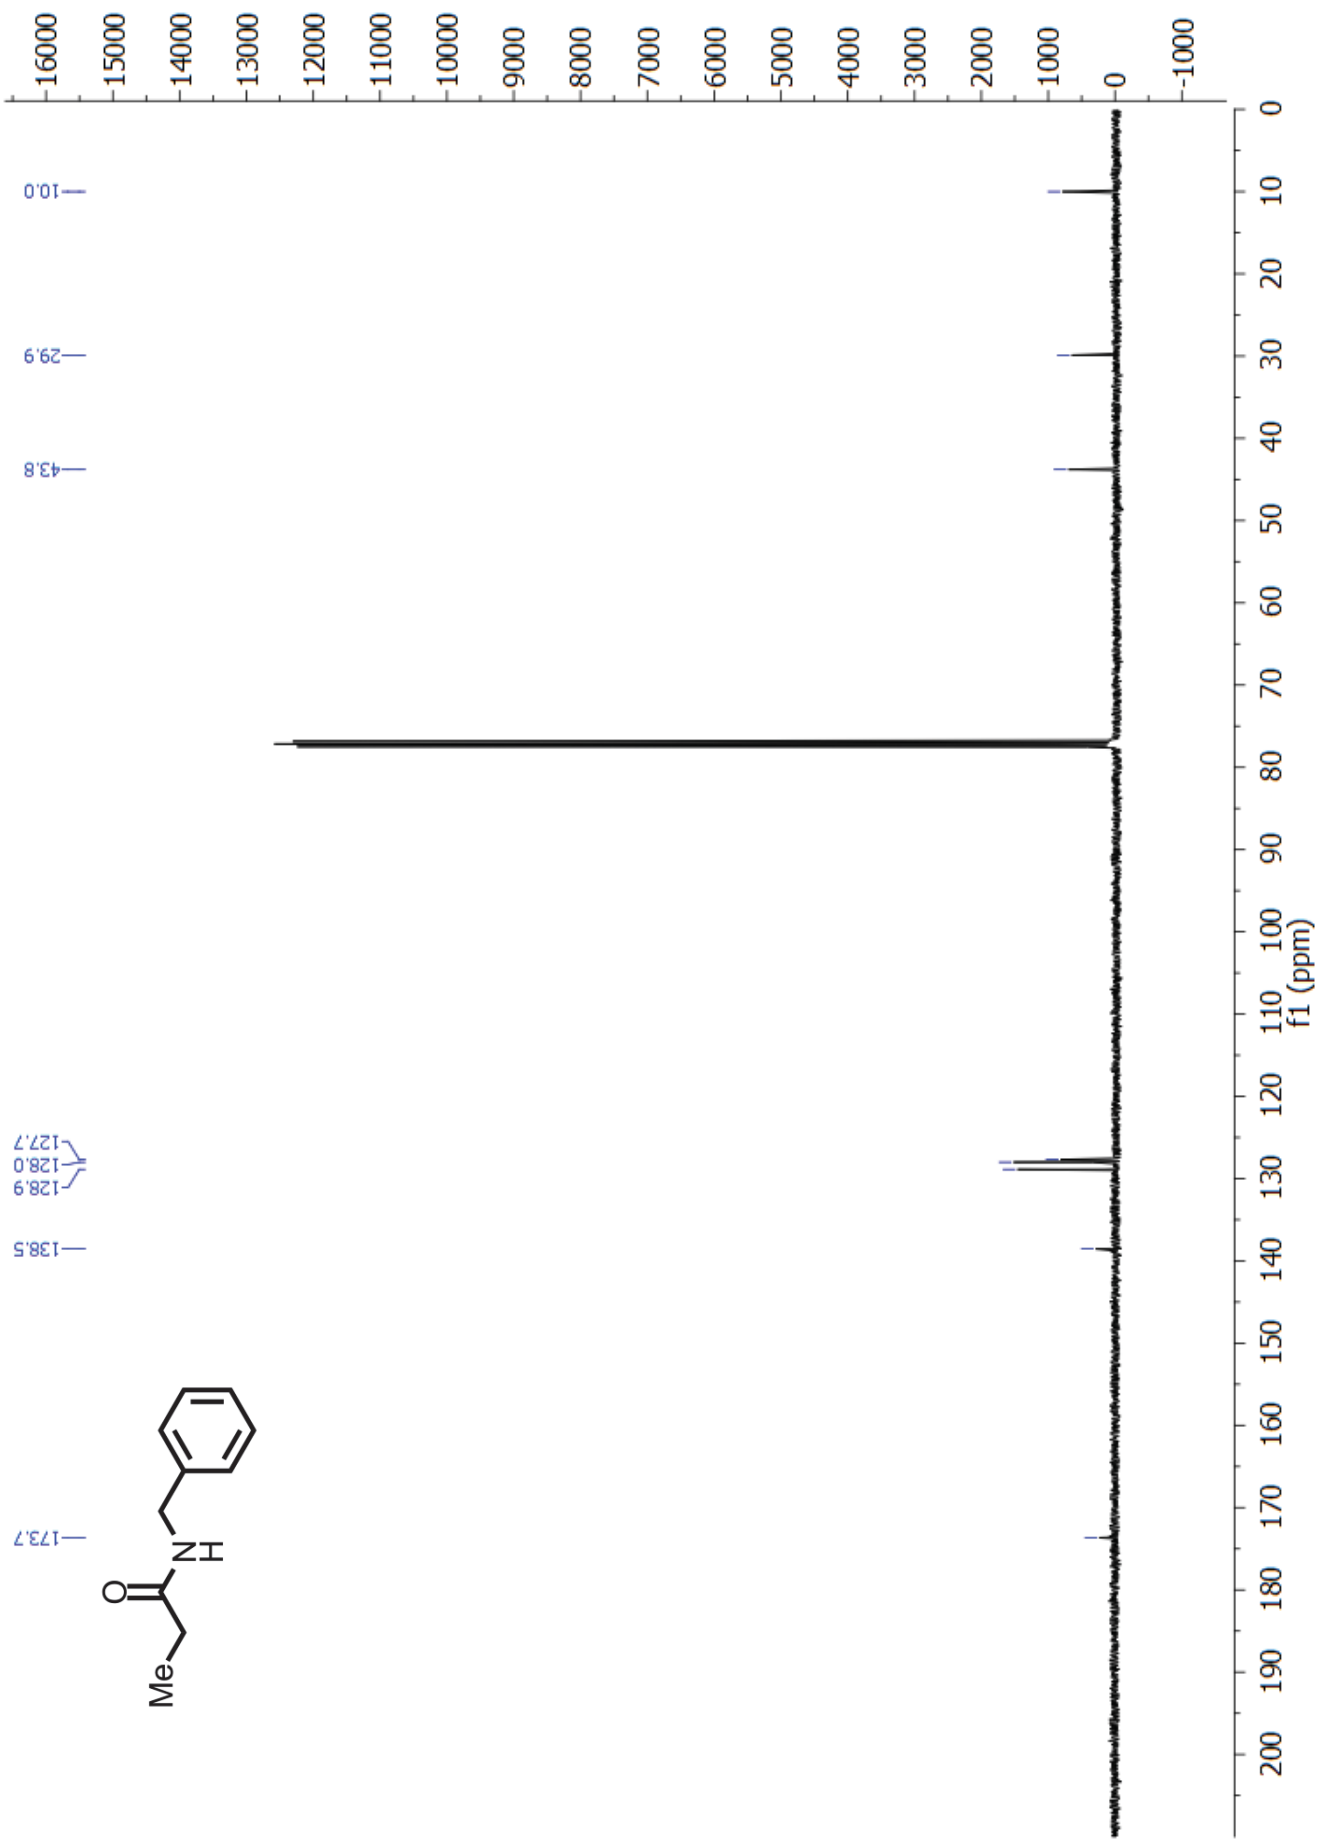

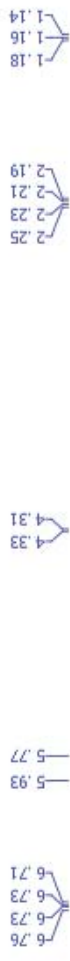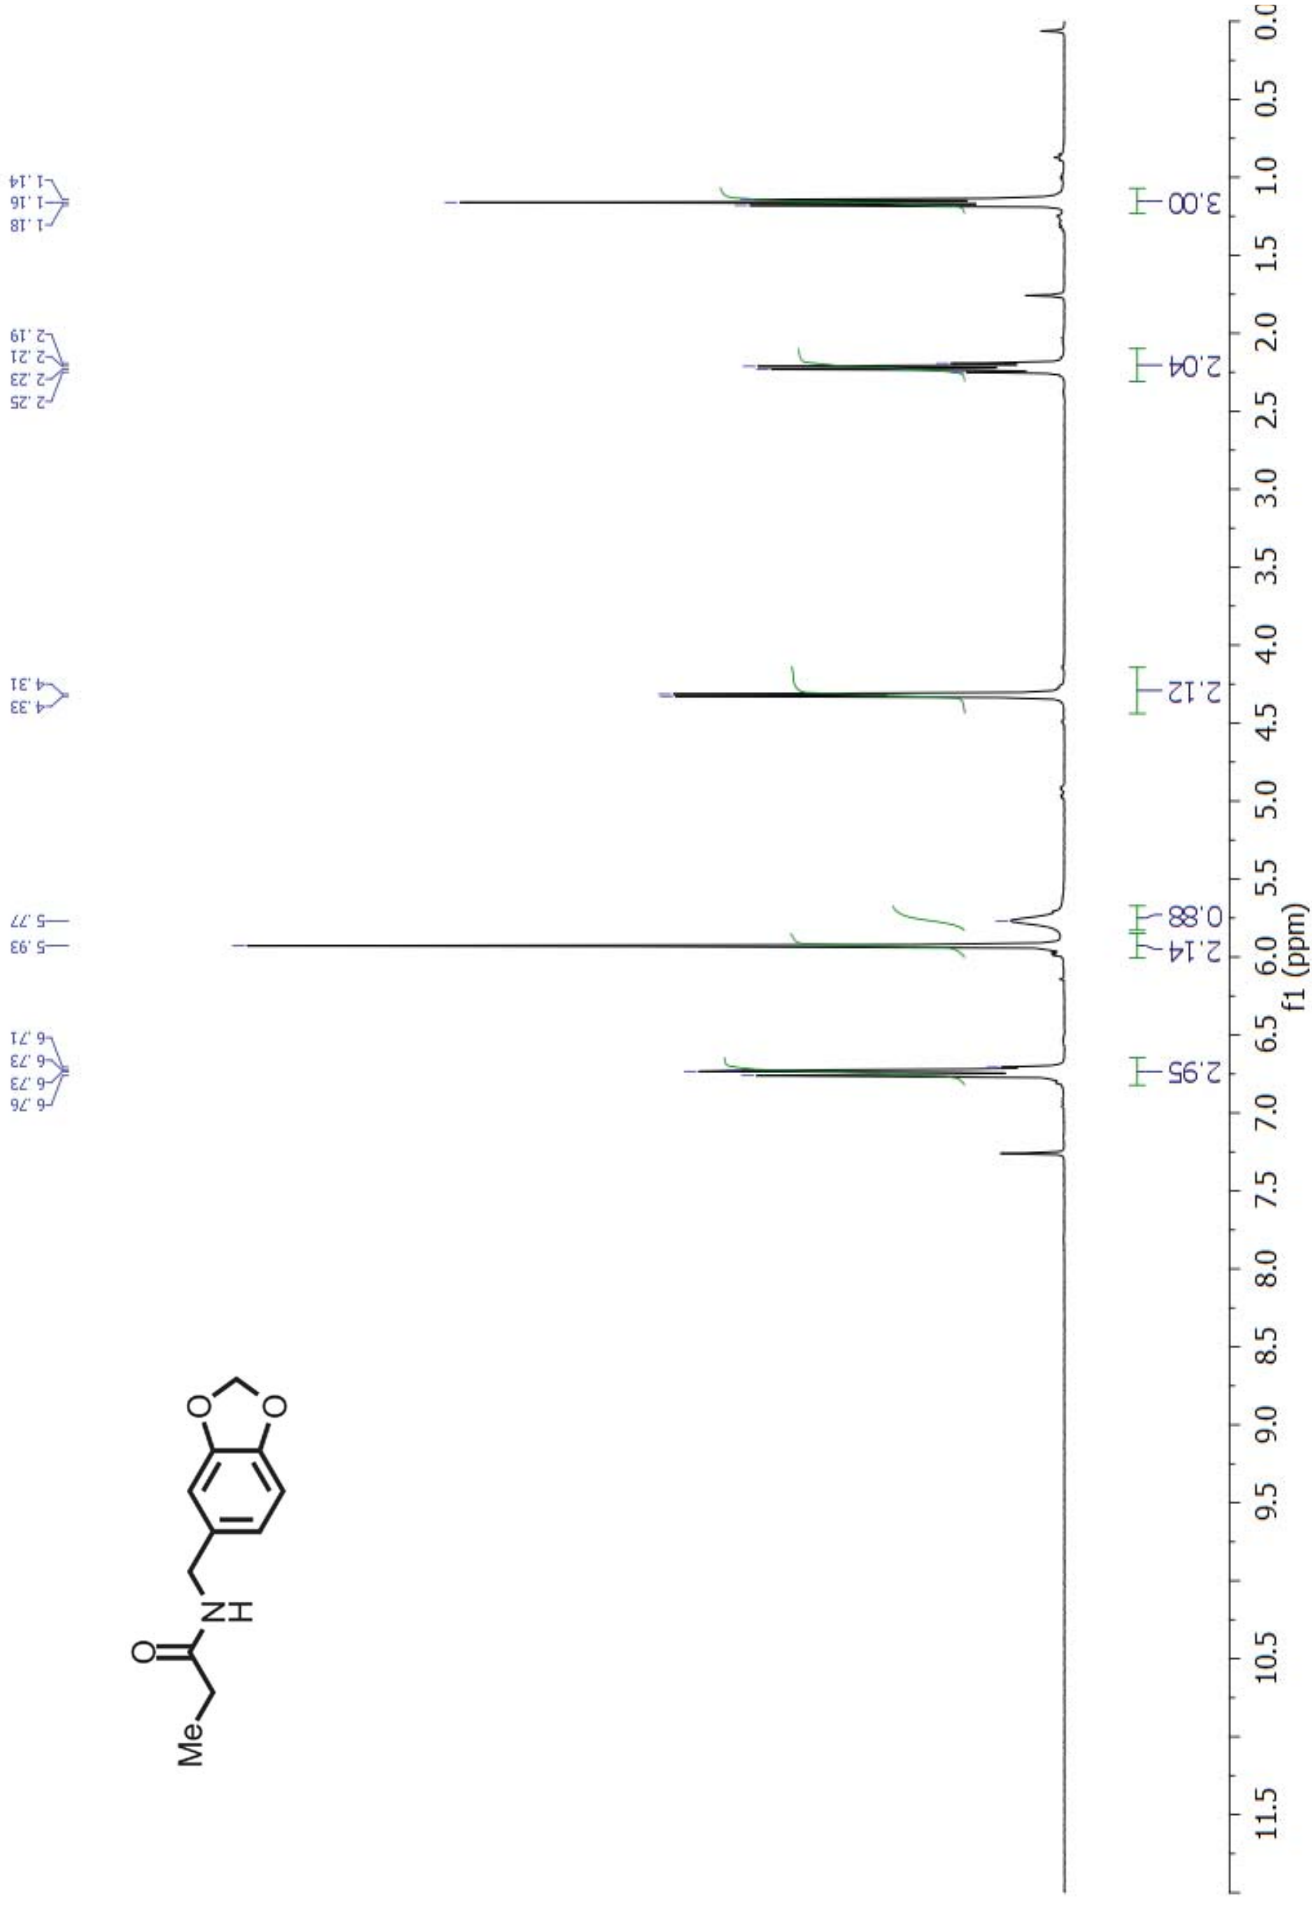

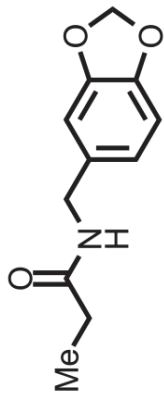

9.51

29.40

43.17

101.24

108.49  
108.61

121.34

132.78

147.36  
148.35

174.35

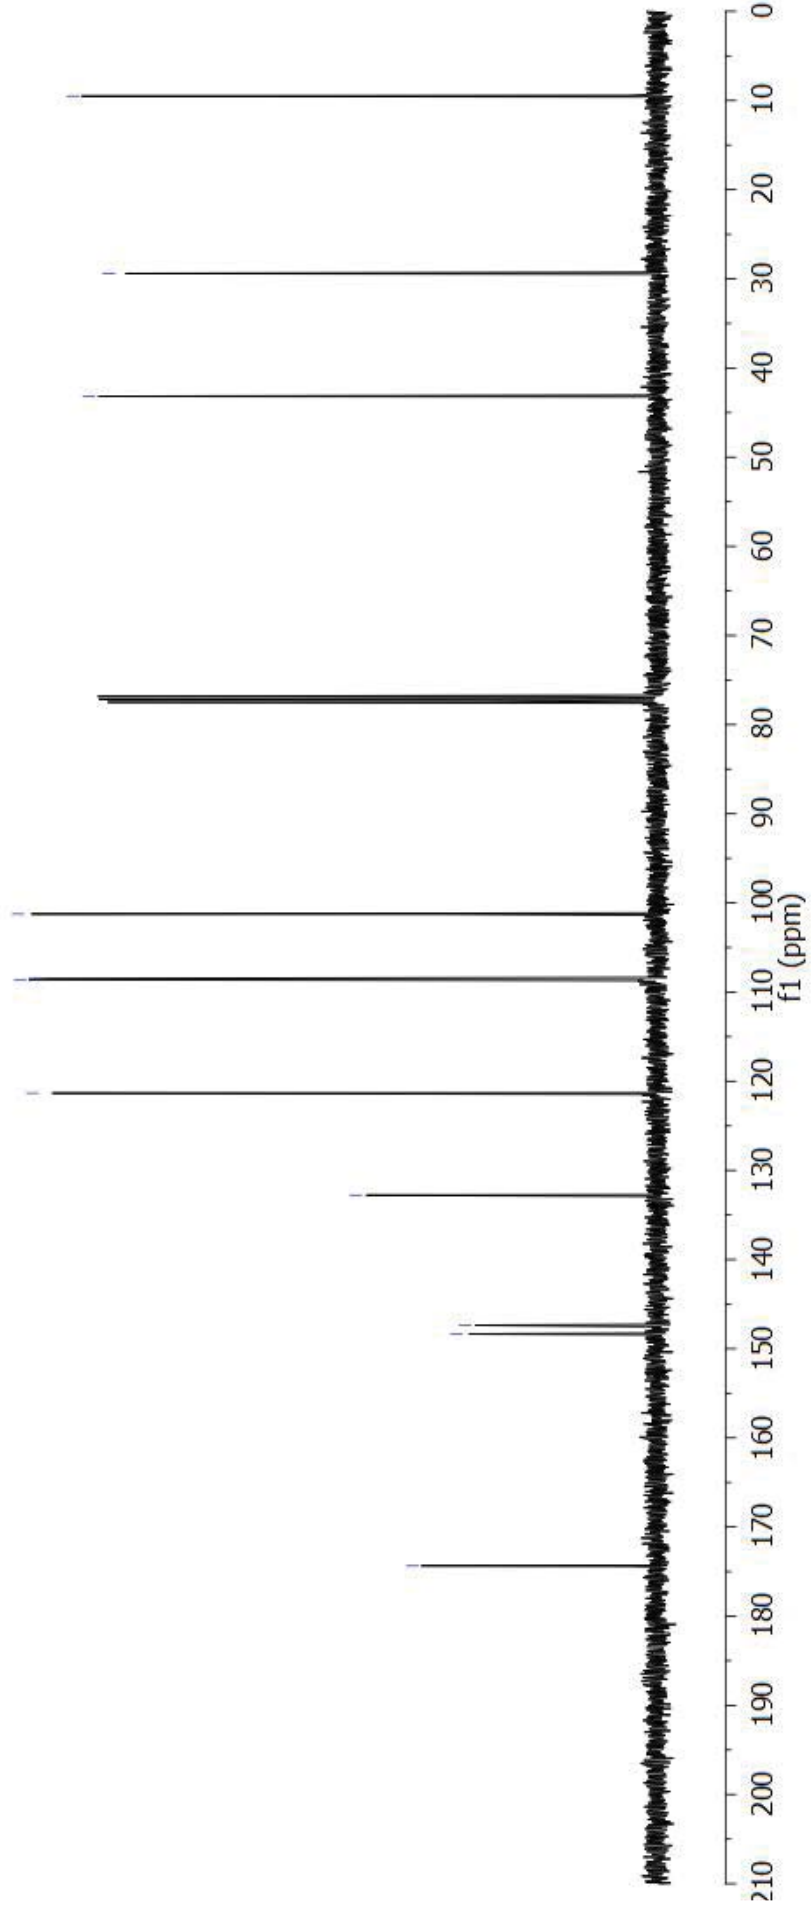

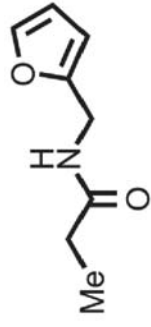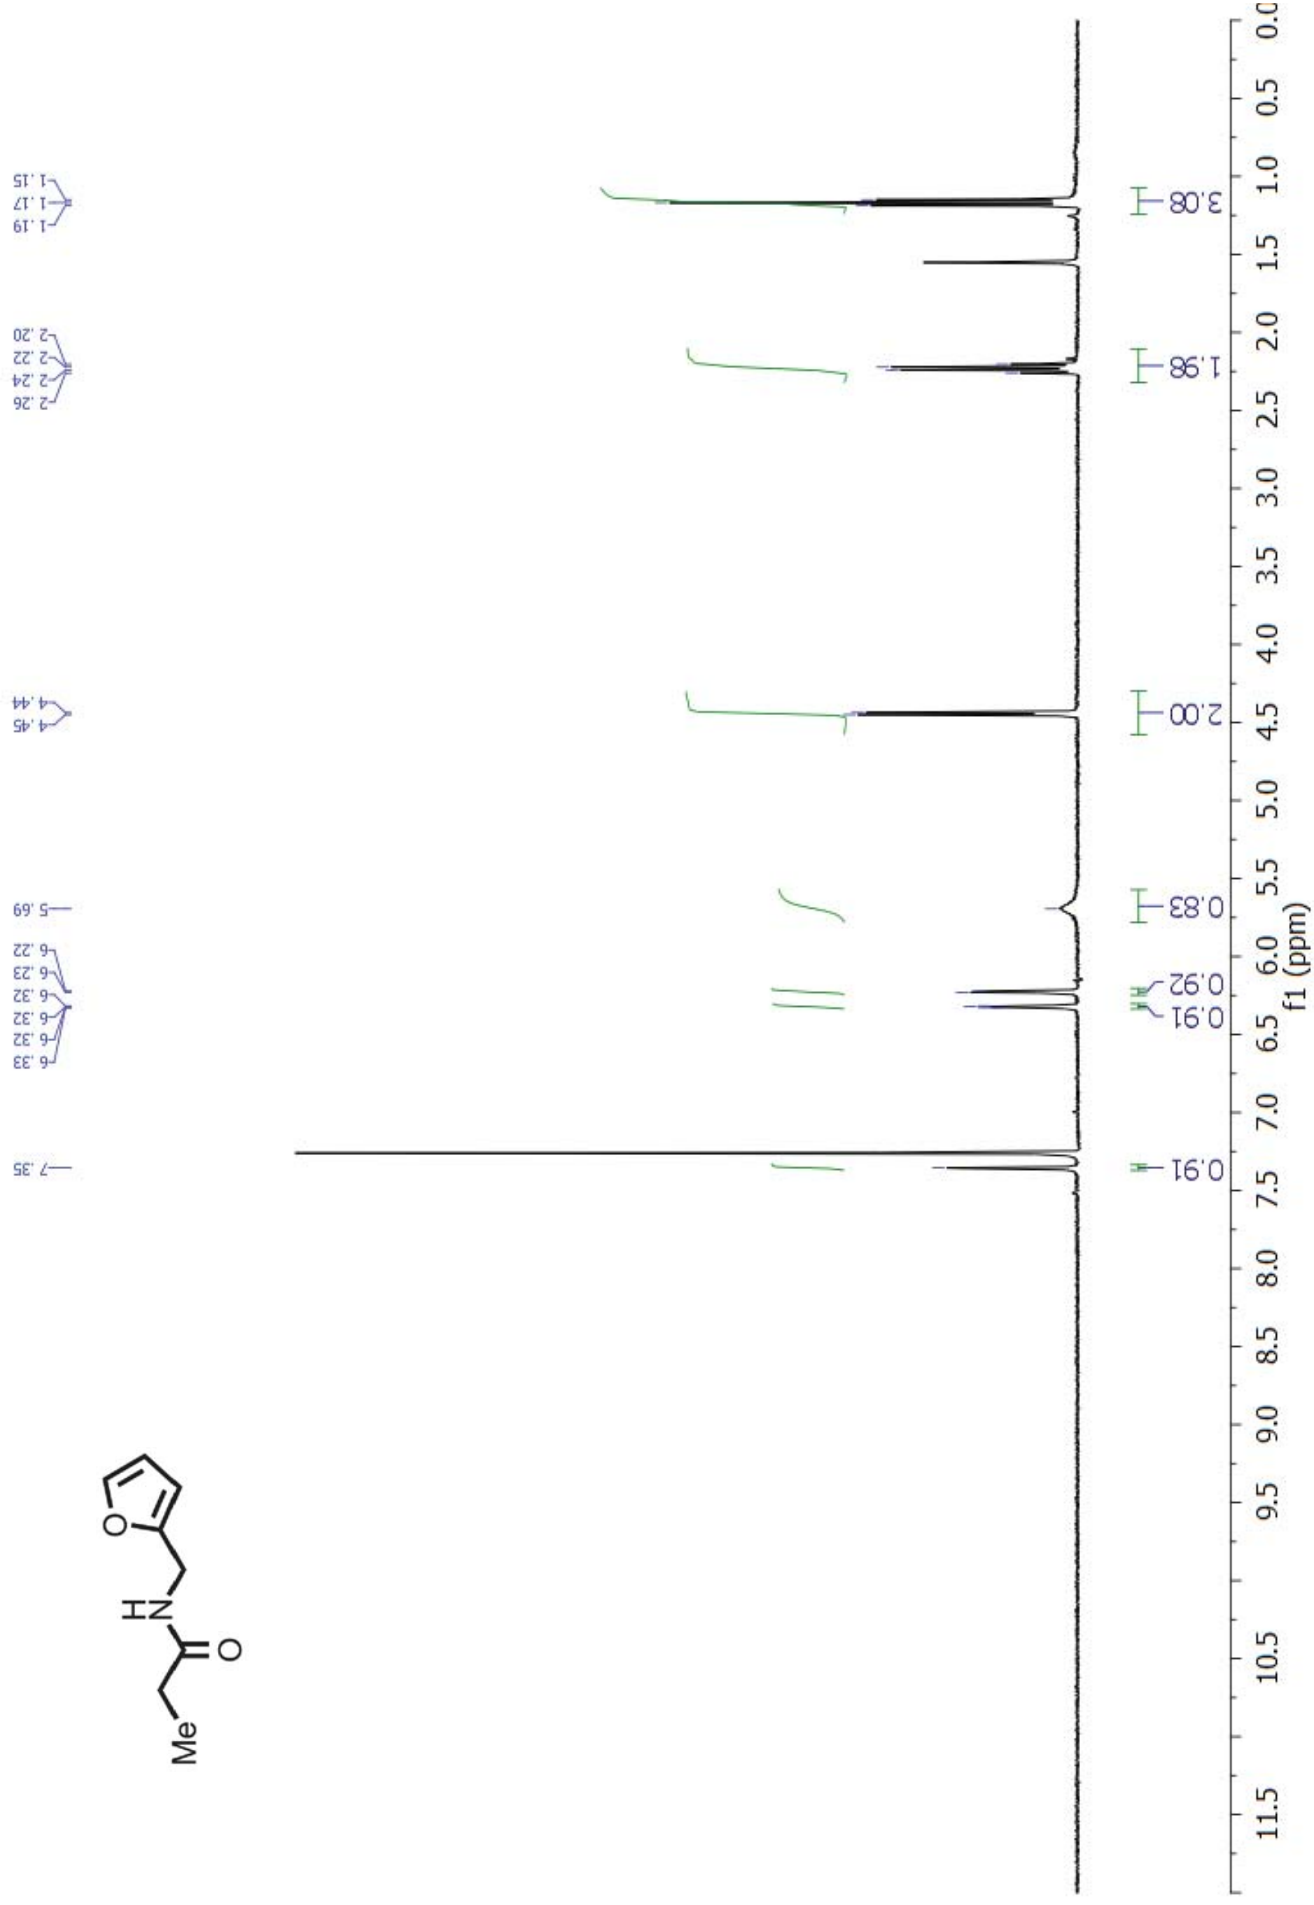

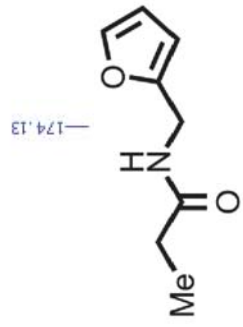

—152.00

—142.73

—110.81  
—107.74

—36.37

—29.44

—9.44

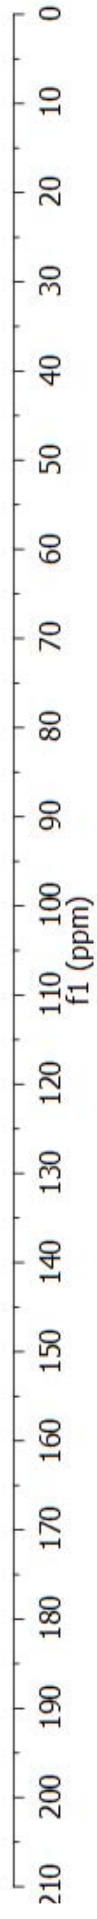

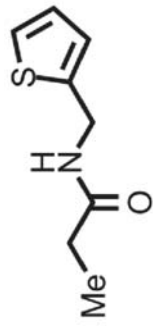

1.11  
1.12  
1.14

2.17  
2.18  
2.20  
2.22

4.54  
4.55

6.31  
6.89  
6.90  
6.91

7.17  
7.17  
7.18  
7.18

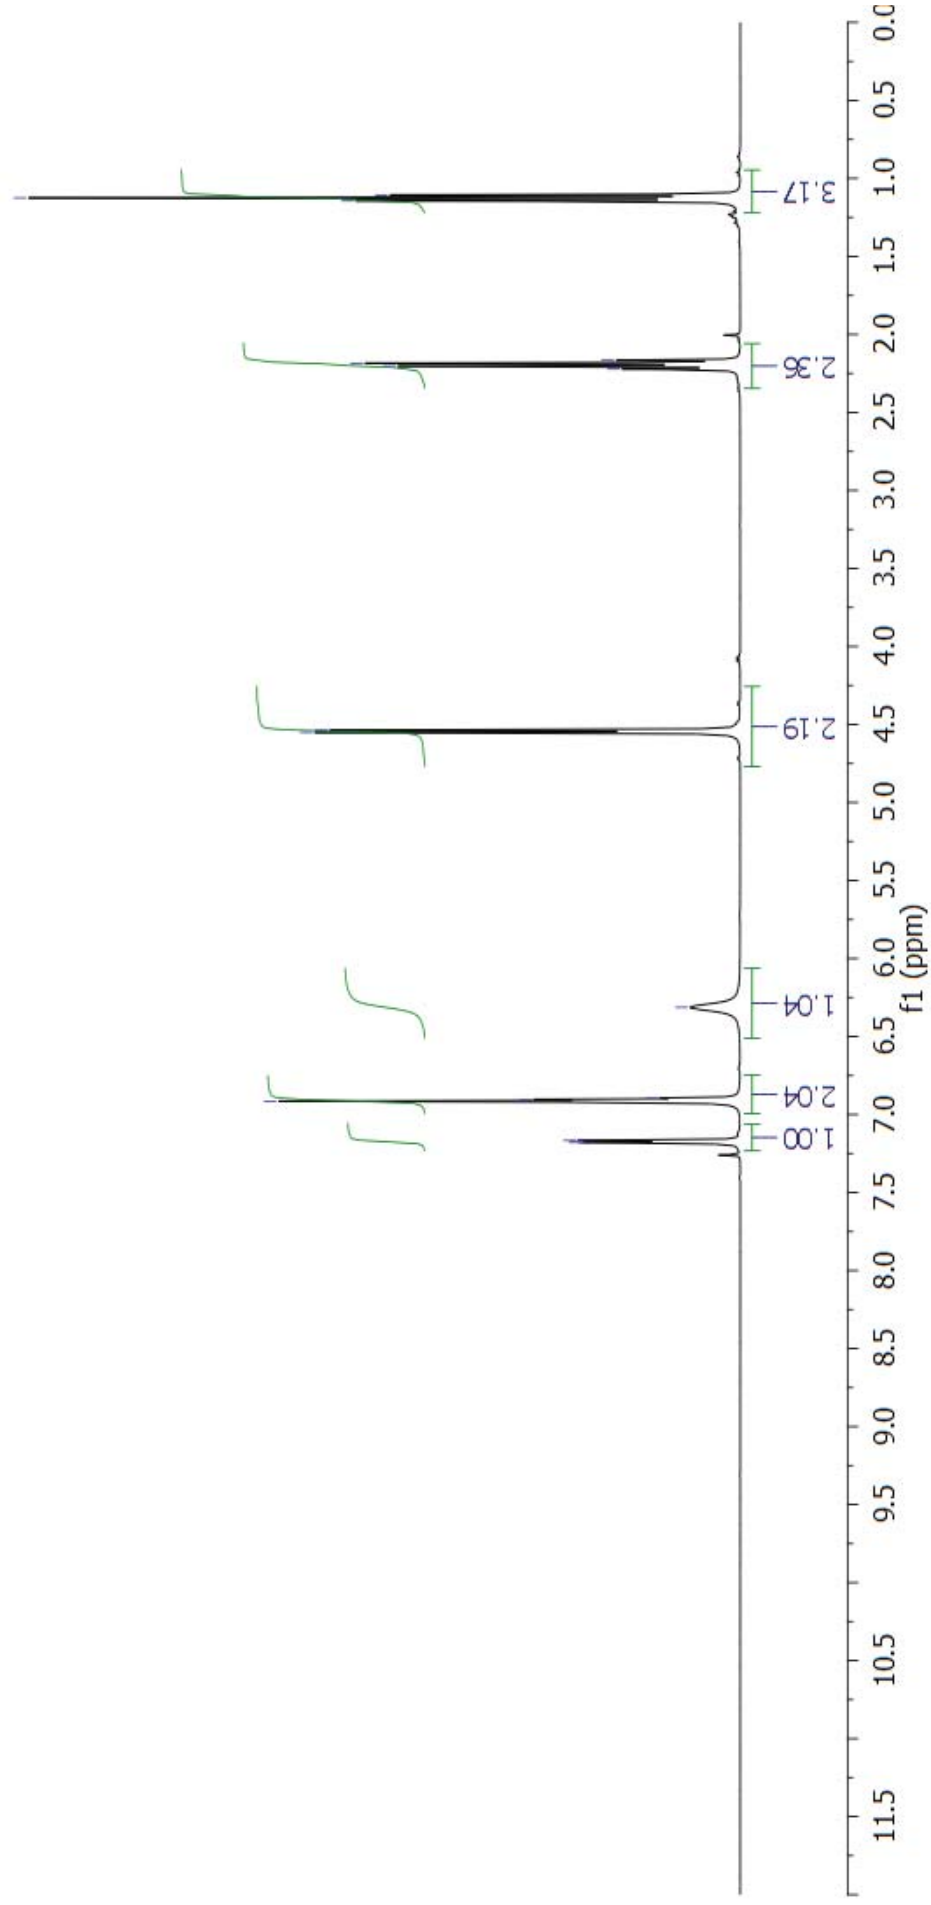

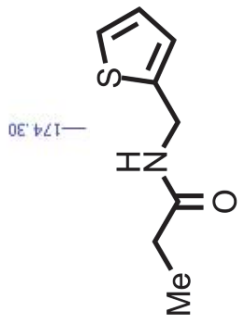

174.30

141.69

127.17  
126.16  
125.36

37.99

29.25

9.40

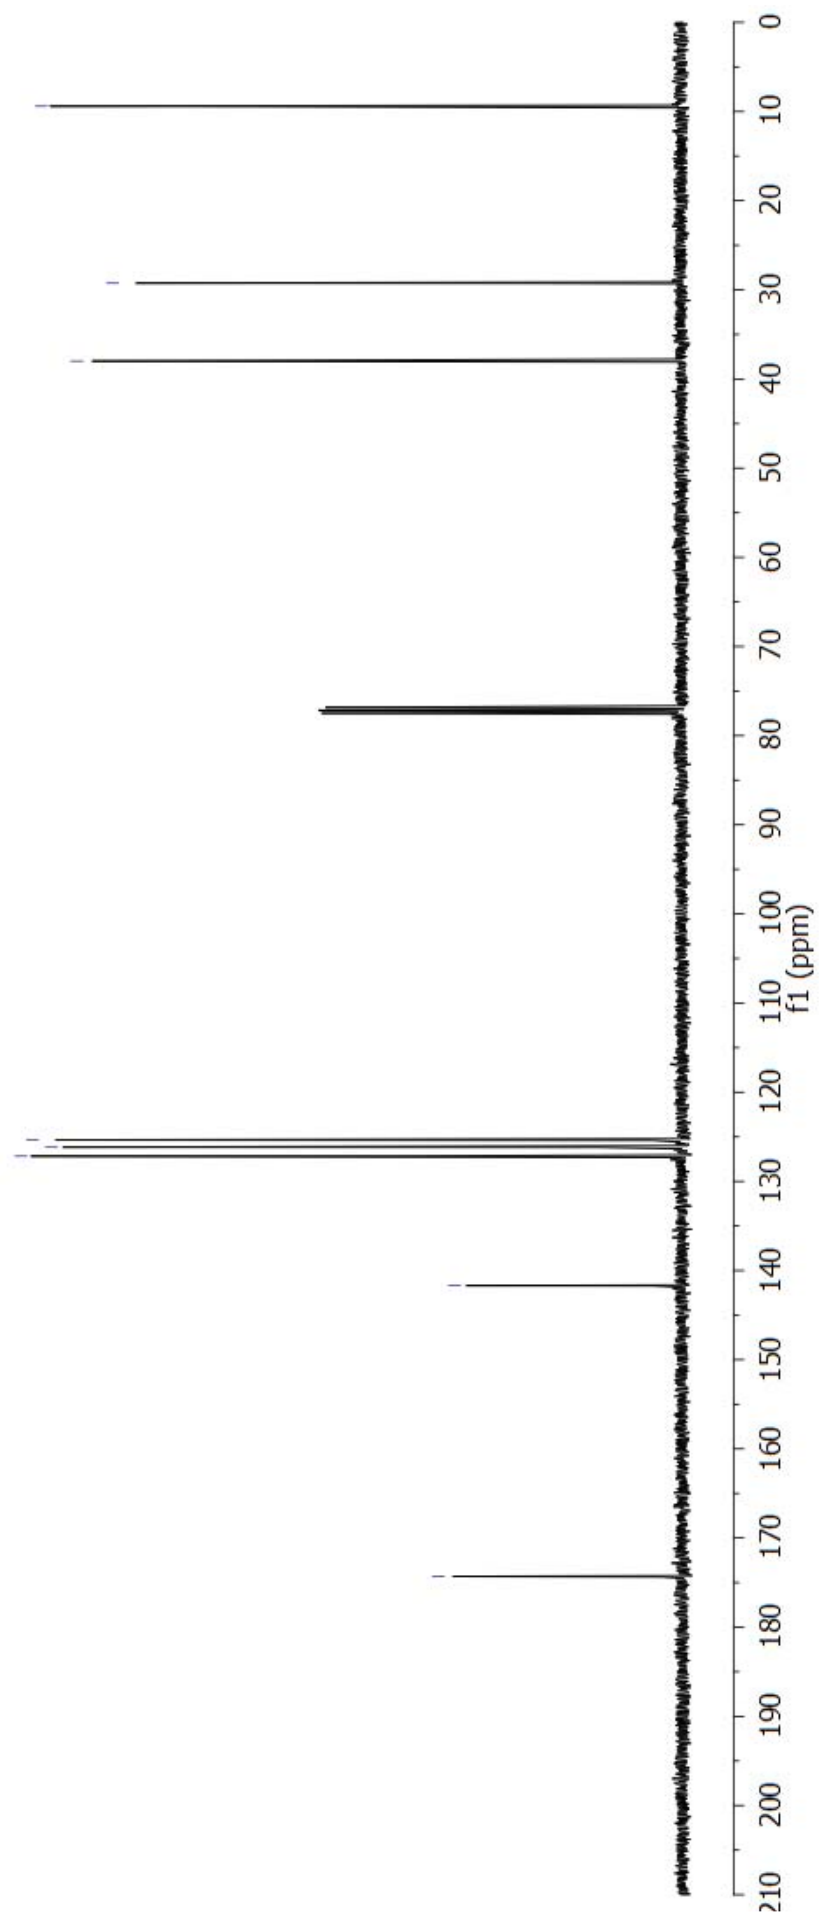

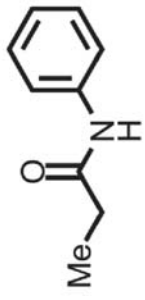

1.20  
1.22  
1.24

2.35  
2.36  
2.38  
2.40

7.06  
7.08  
7.10  
7.27  
7.51  
7.53  
7.62

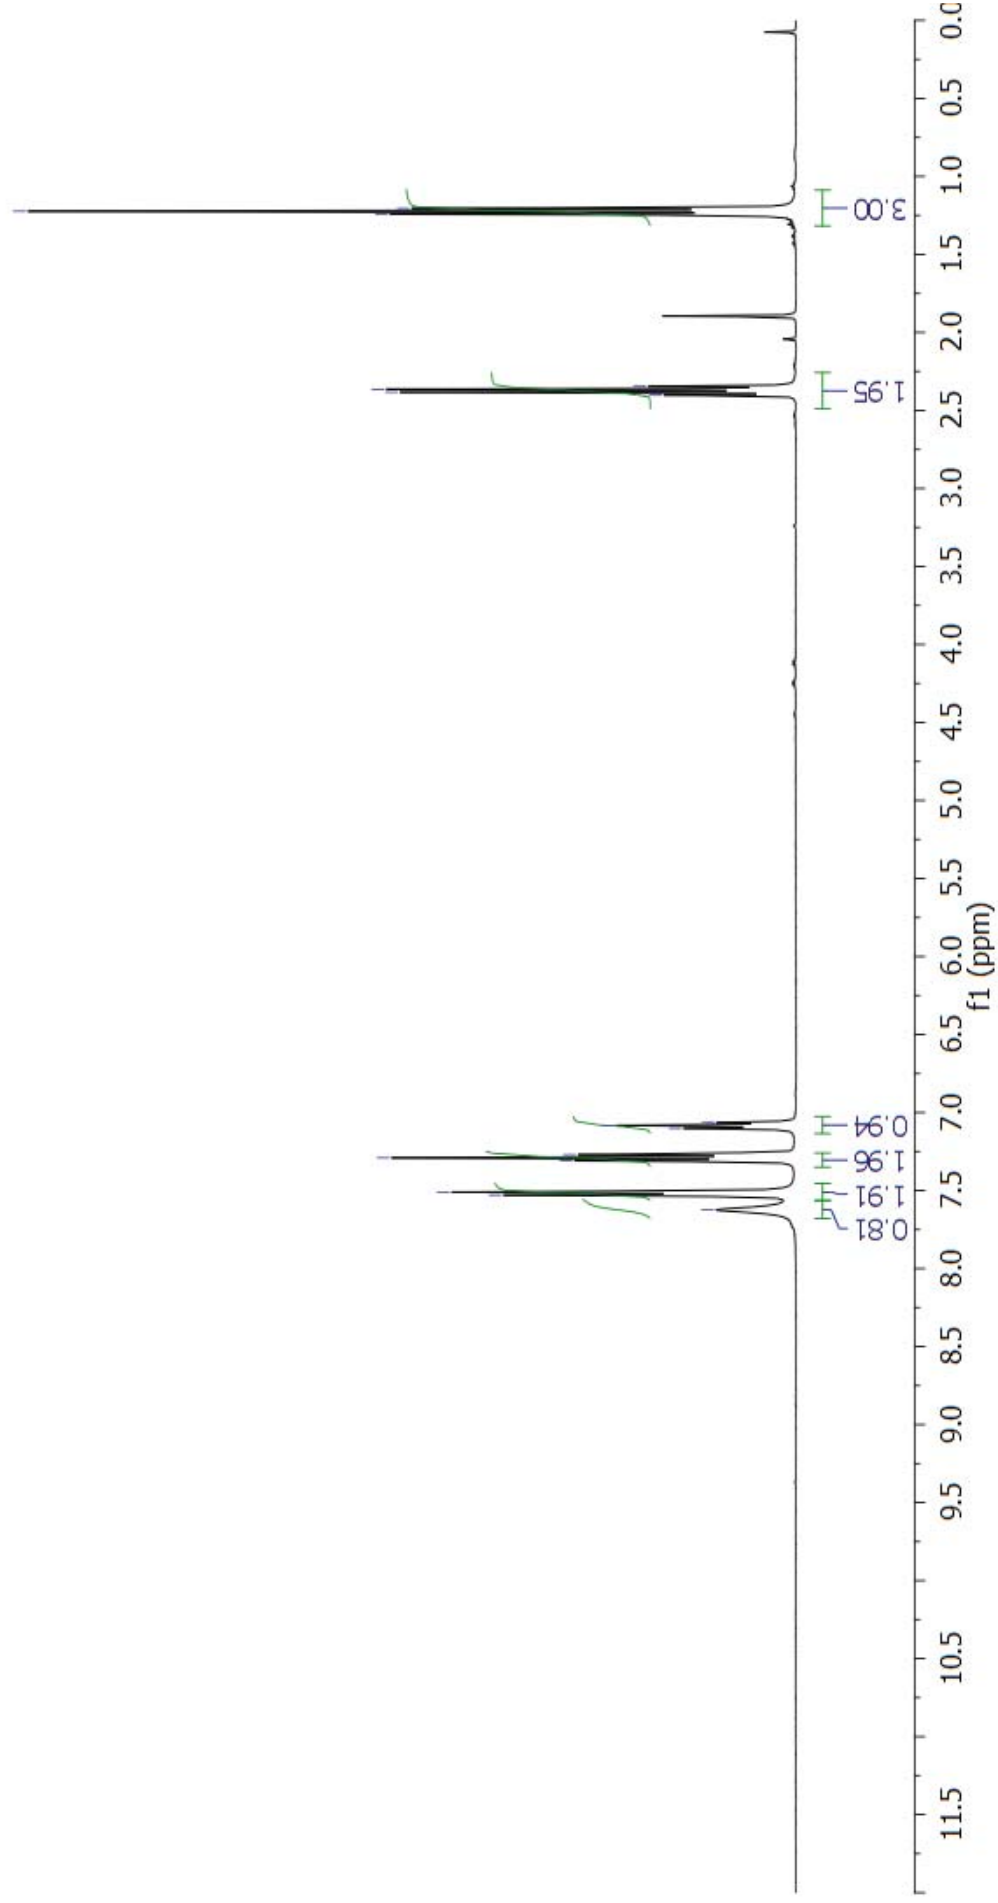

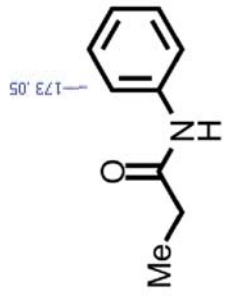

173.05

138.53

129.34

124.52

120.30

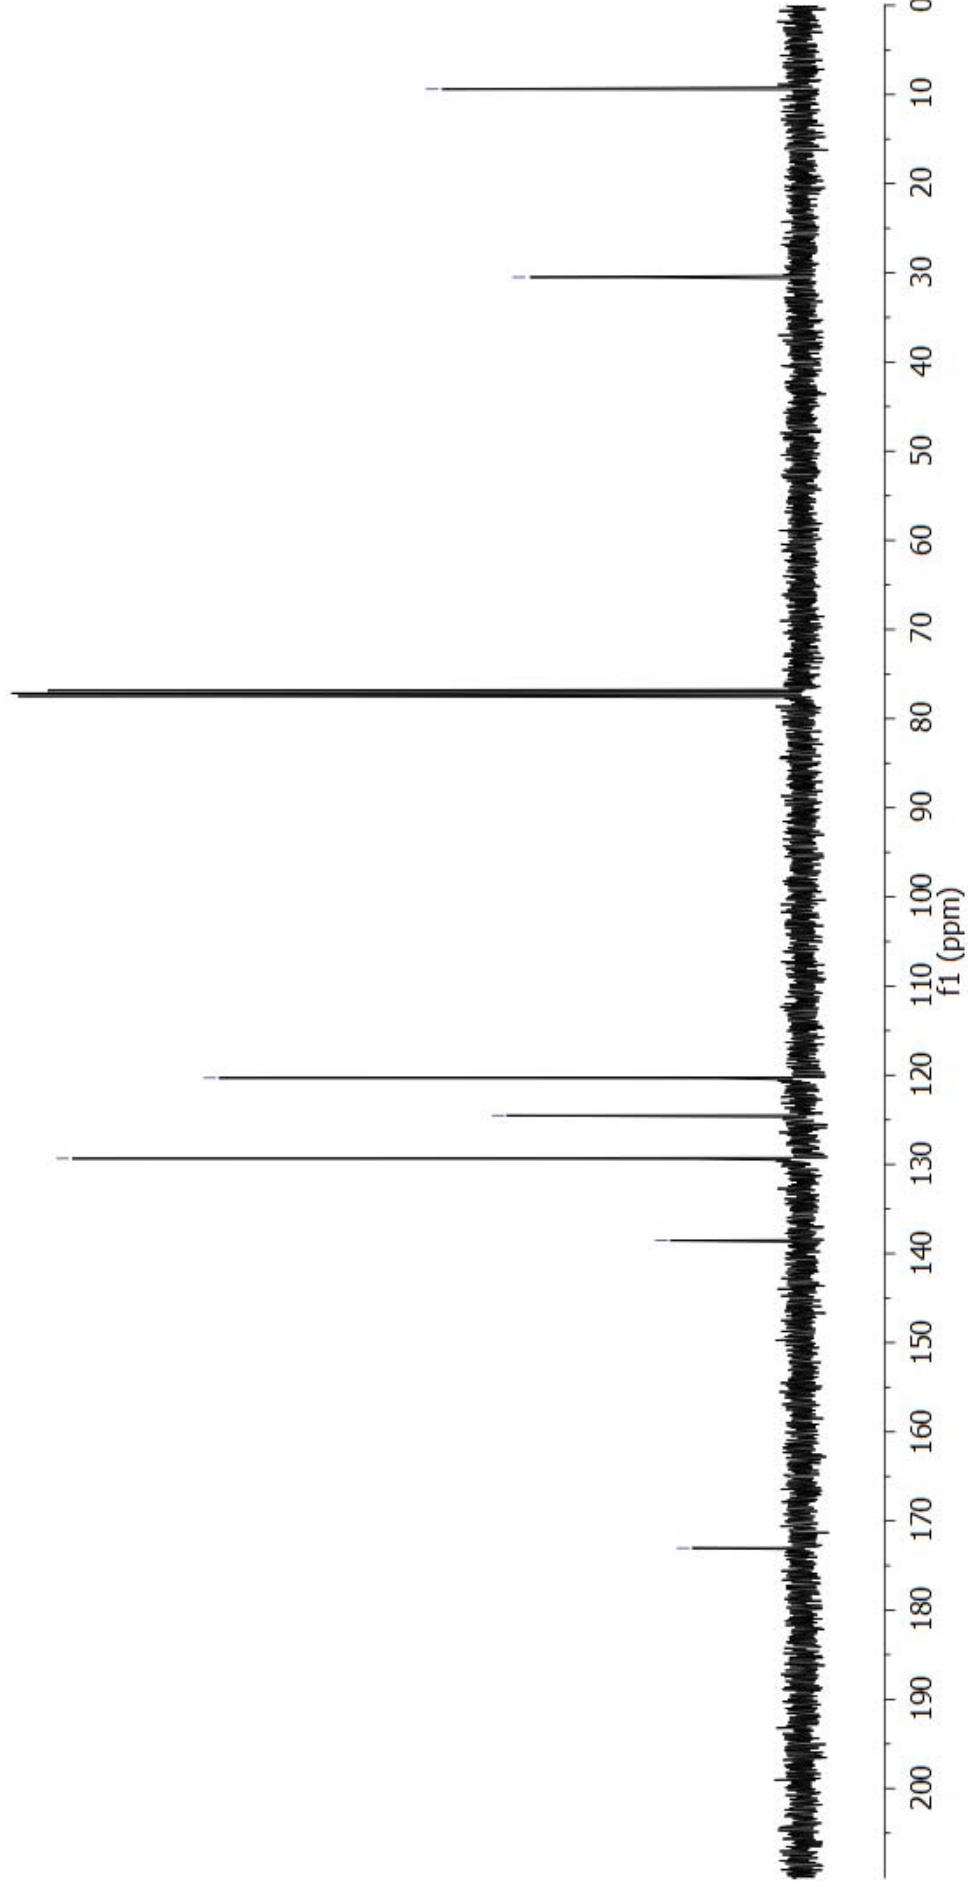

30.49

9.40

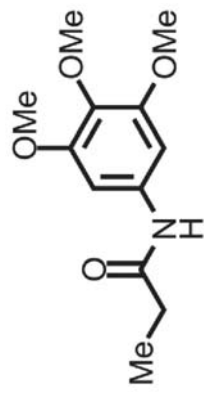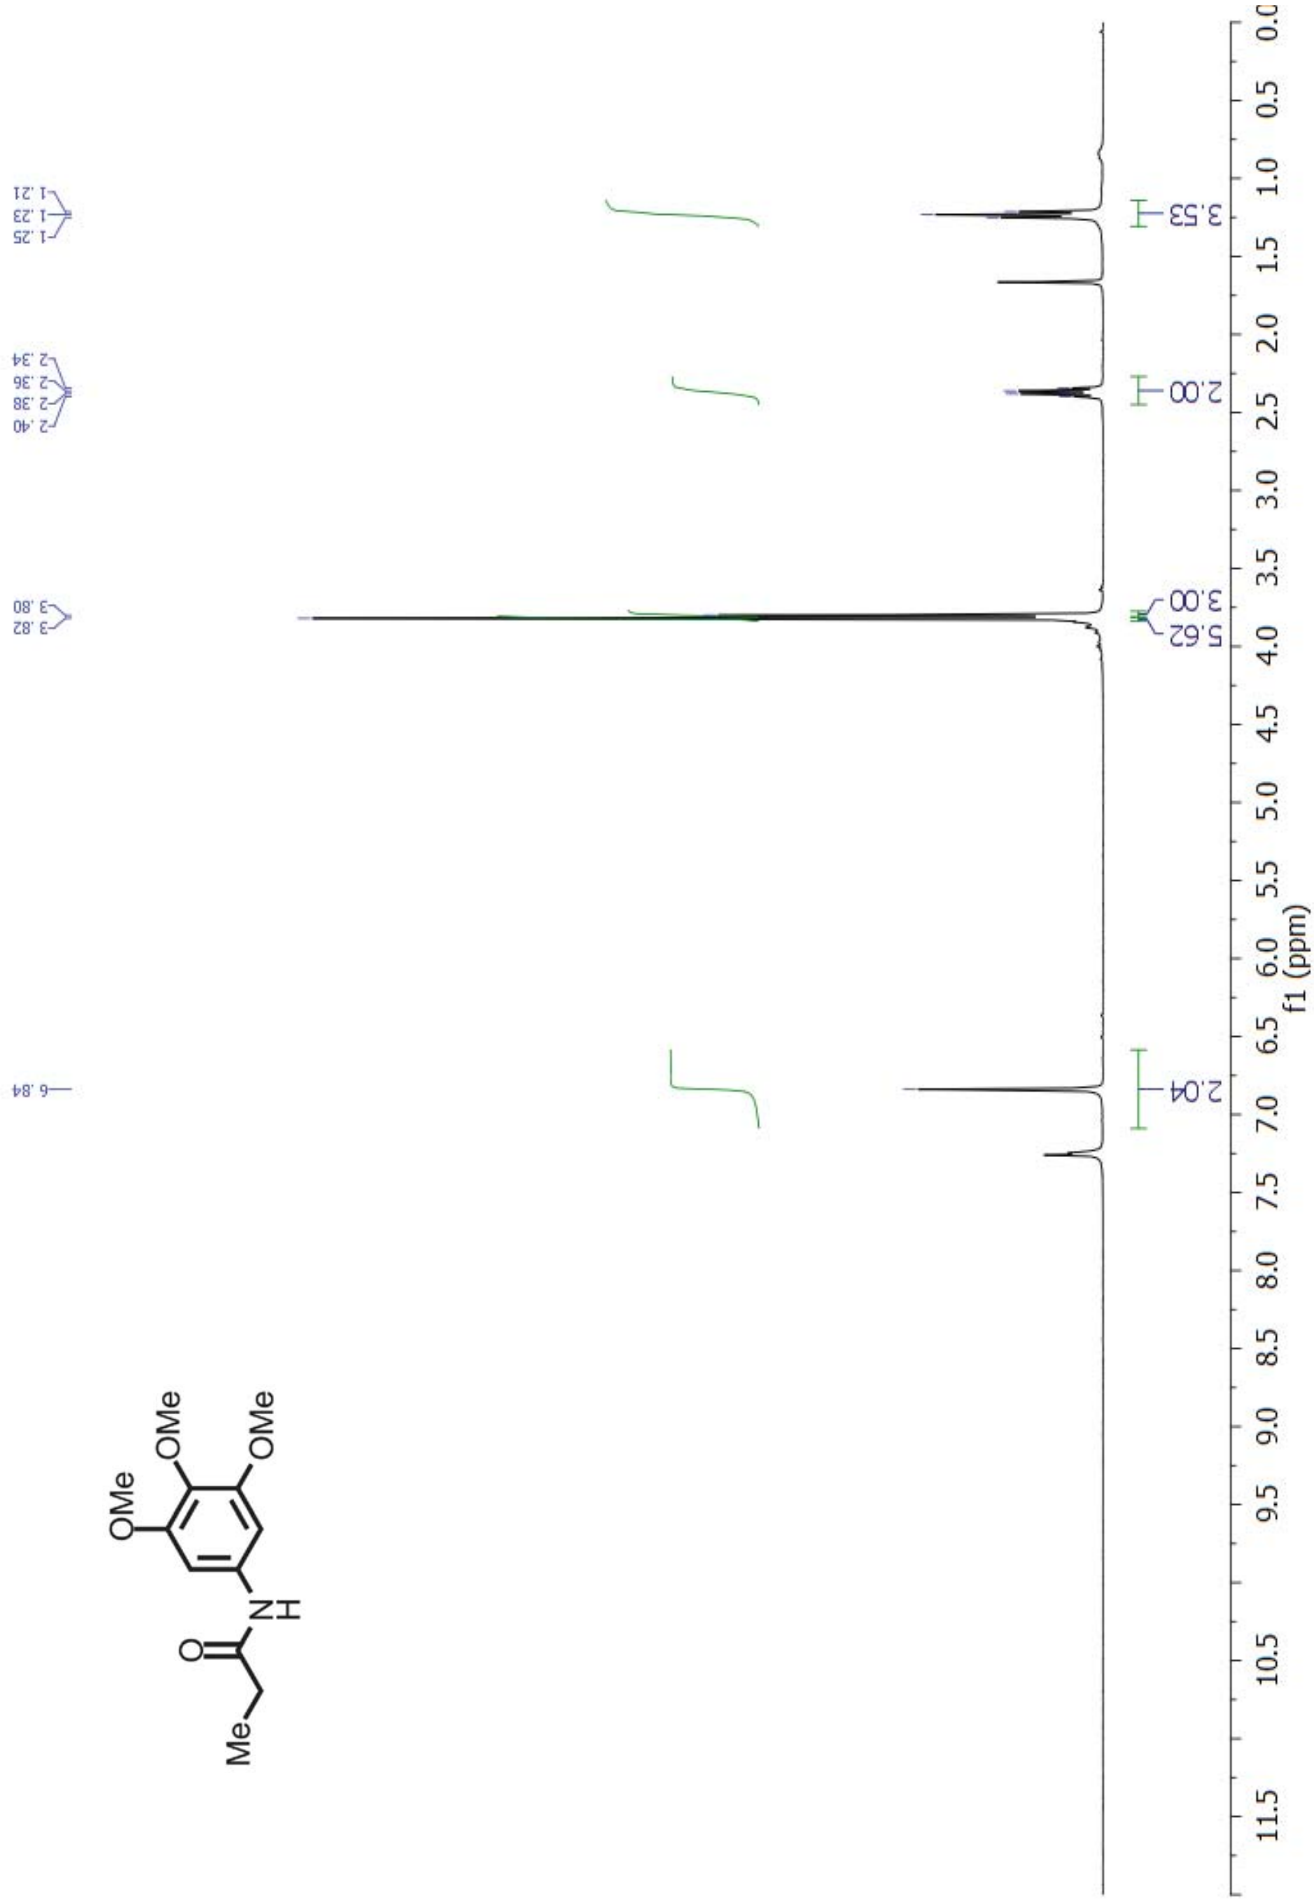

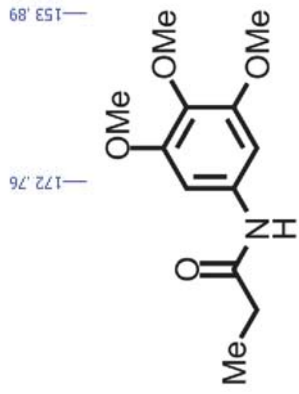

153.89

172.76

134.97  
134.67

97.65

60.99

56.07

30.55

9.29

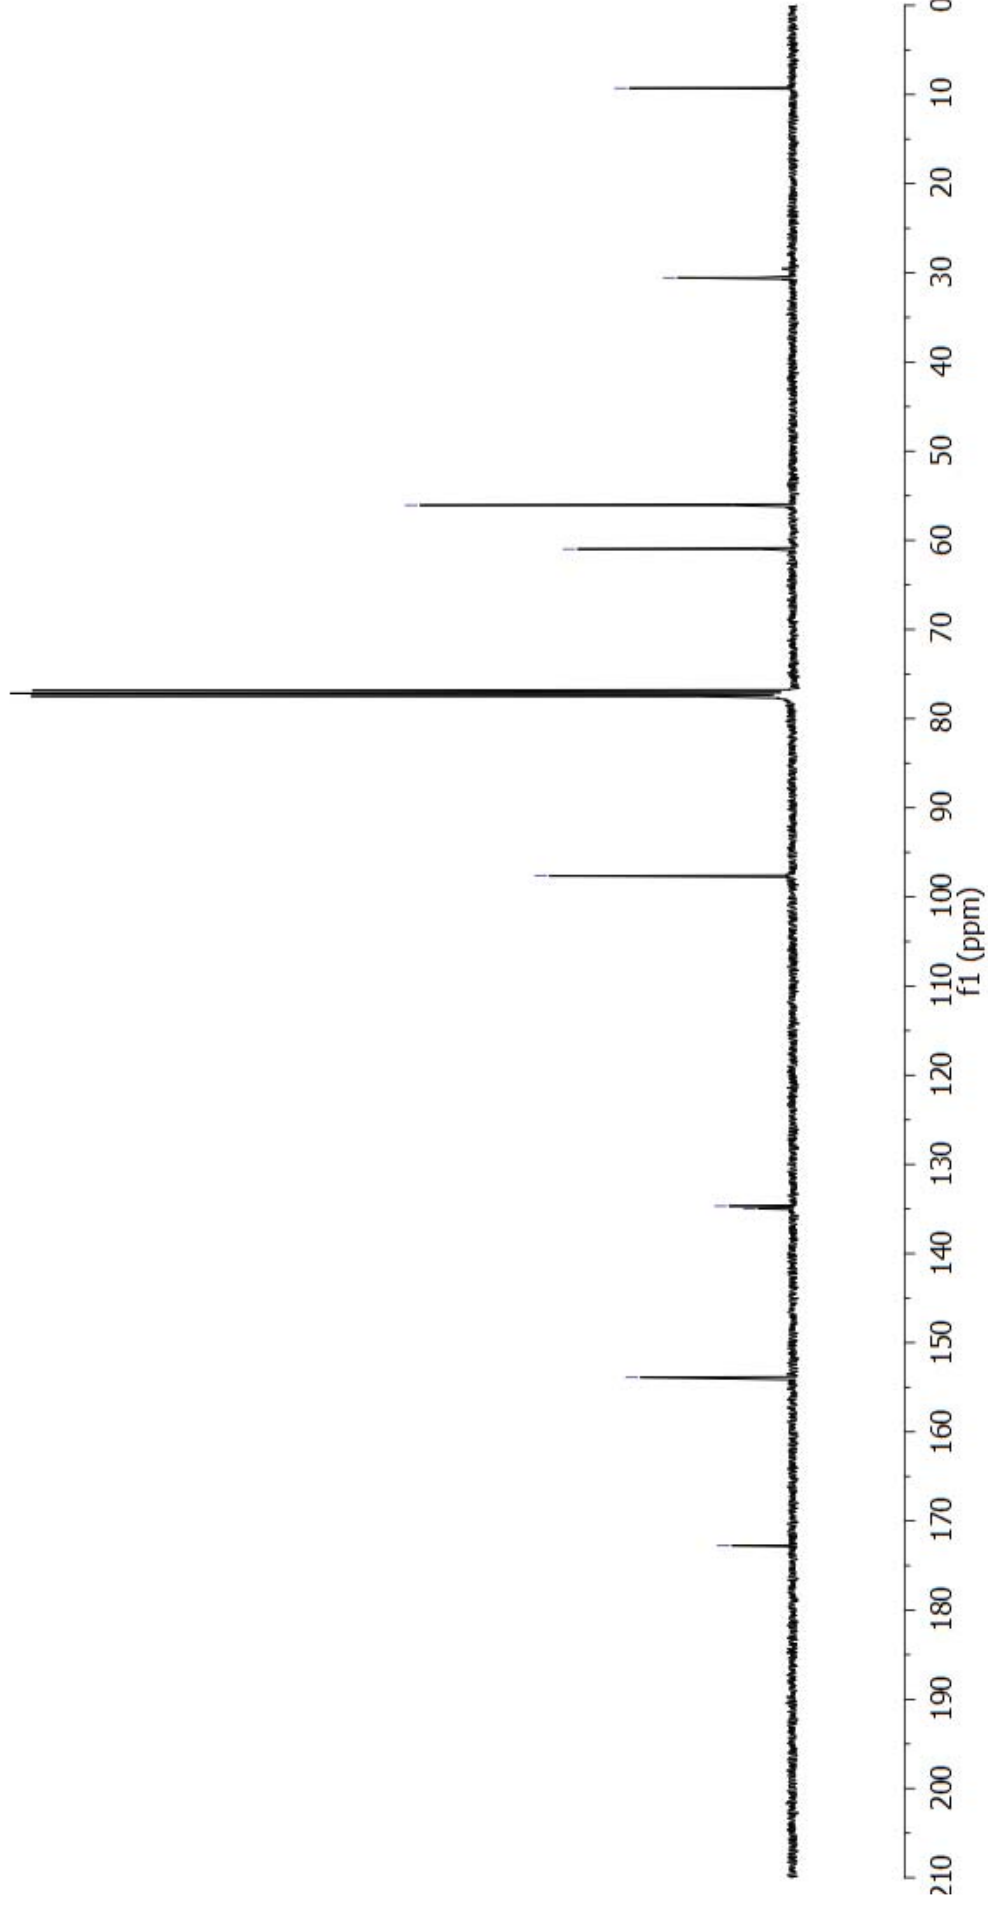

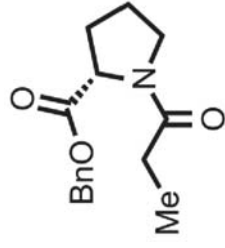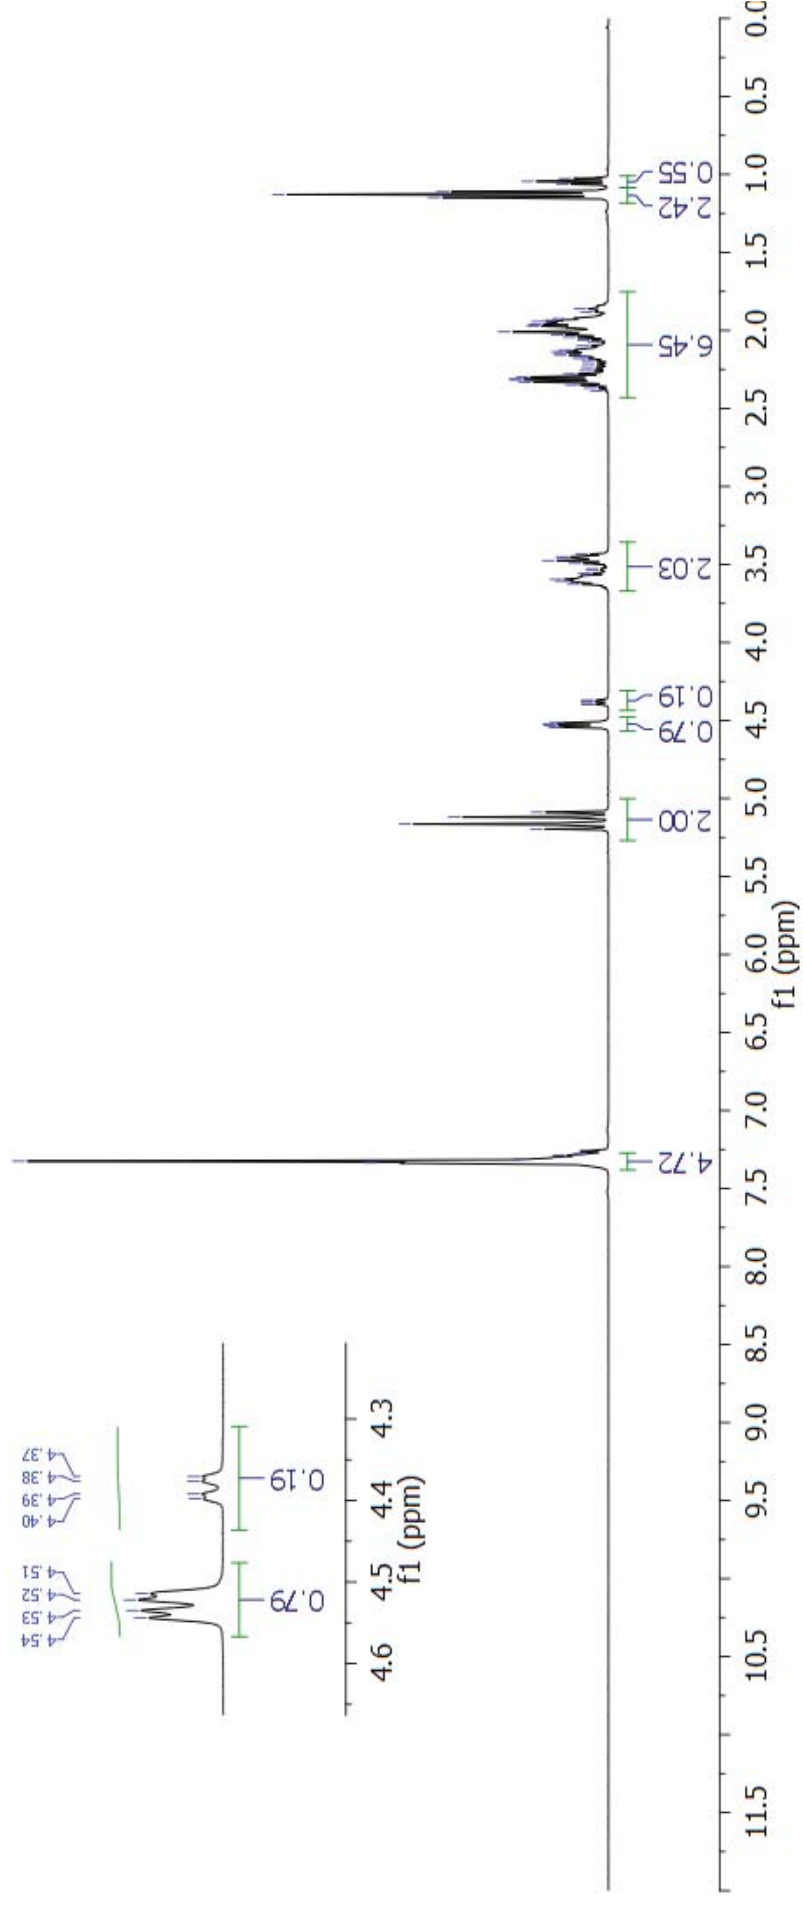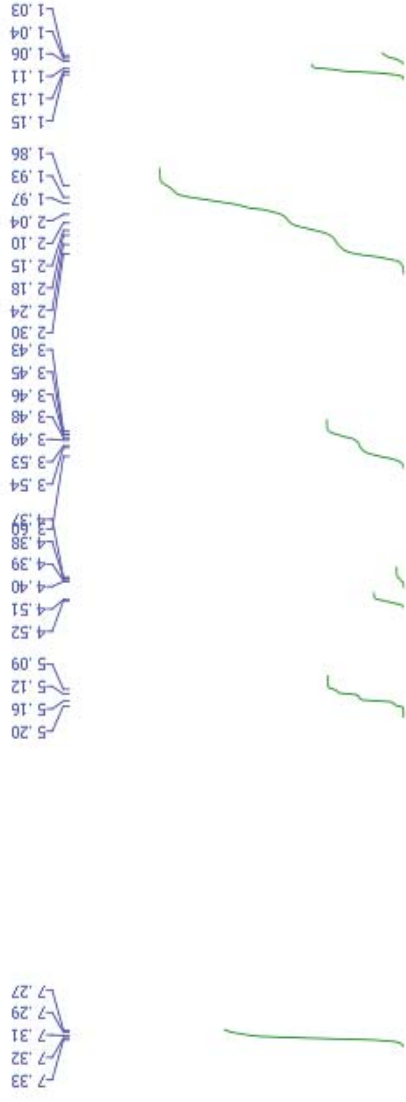

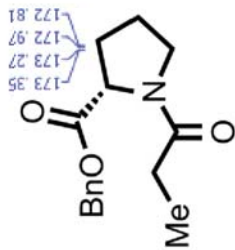

136.22  
135.65  
129.05  
128.96  
128.87  
128.66  
128.52  
128.39

67.16  
66.68  
59.37  
58.65

46.70  
46.23

31.25  
28.93  
27.37  
27.23  
24.50  
22.29

8.61  
8.34

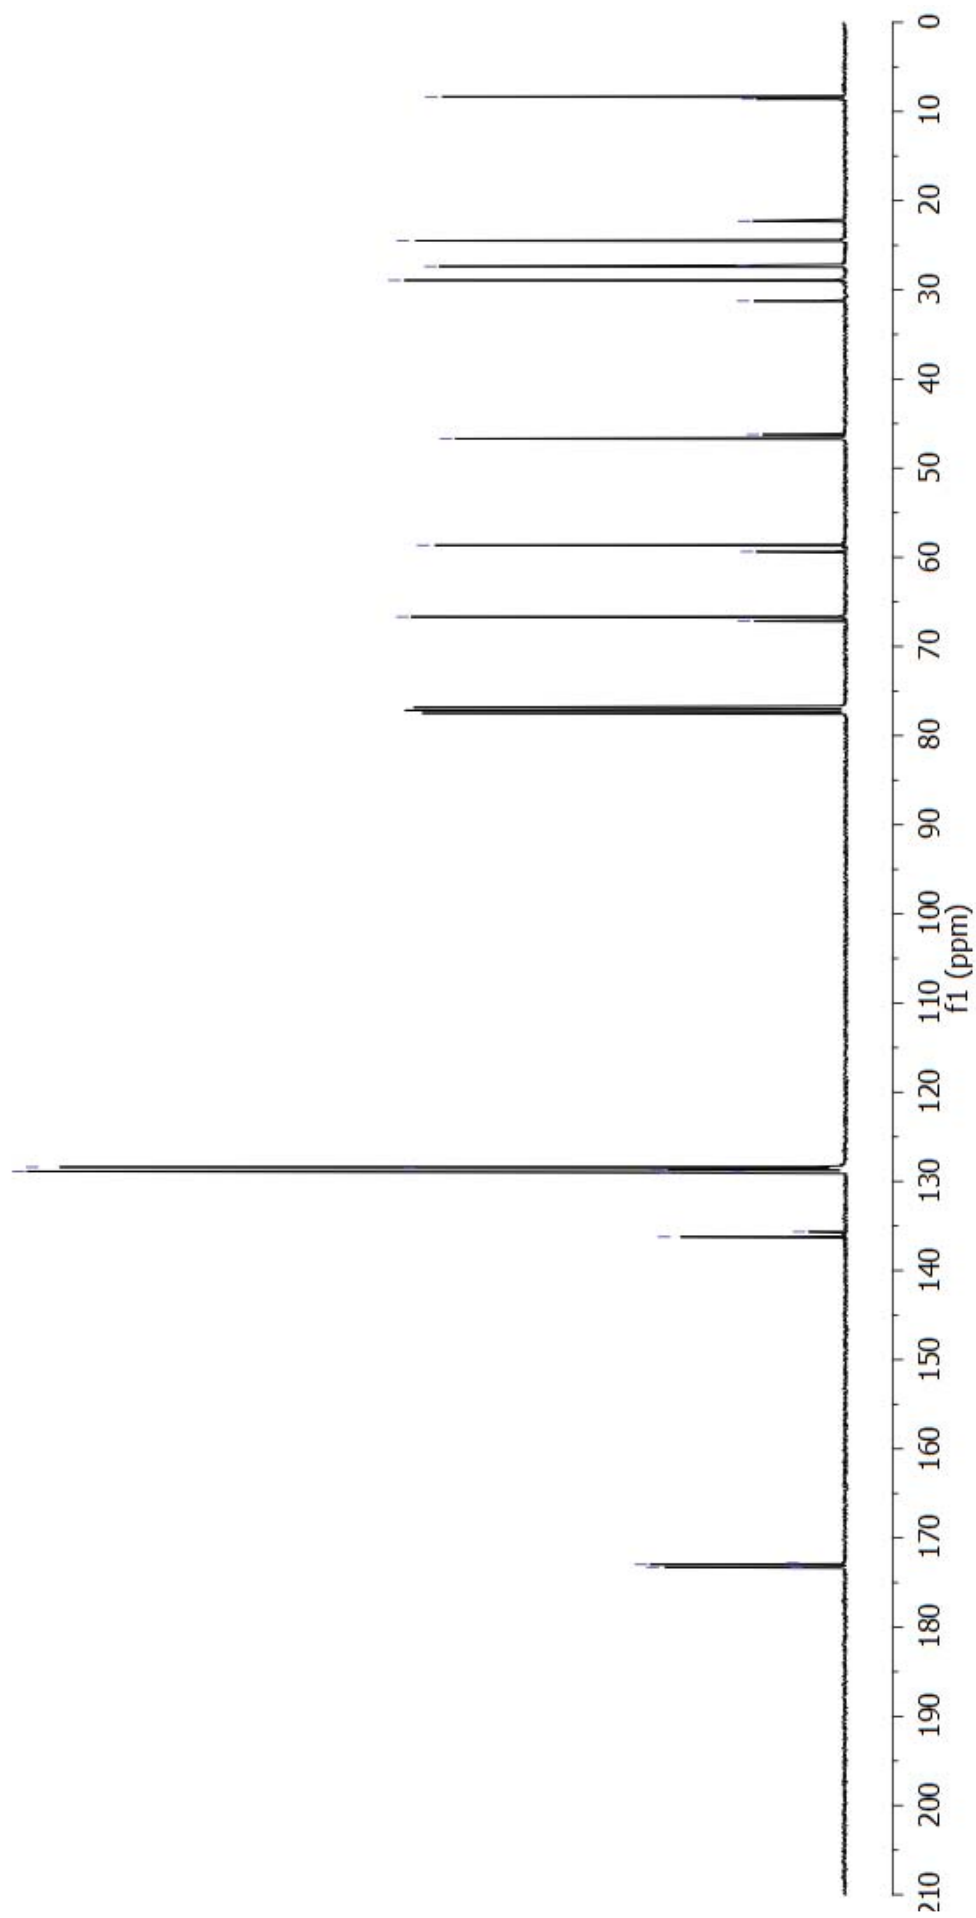

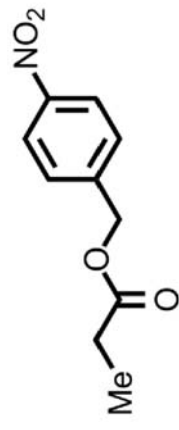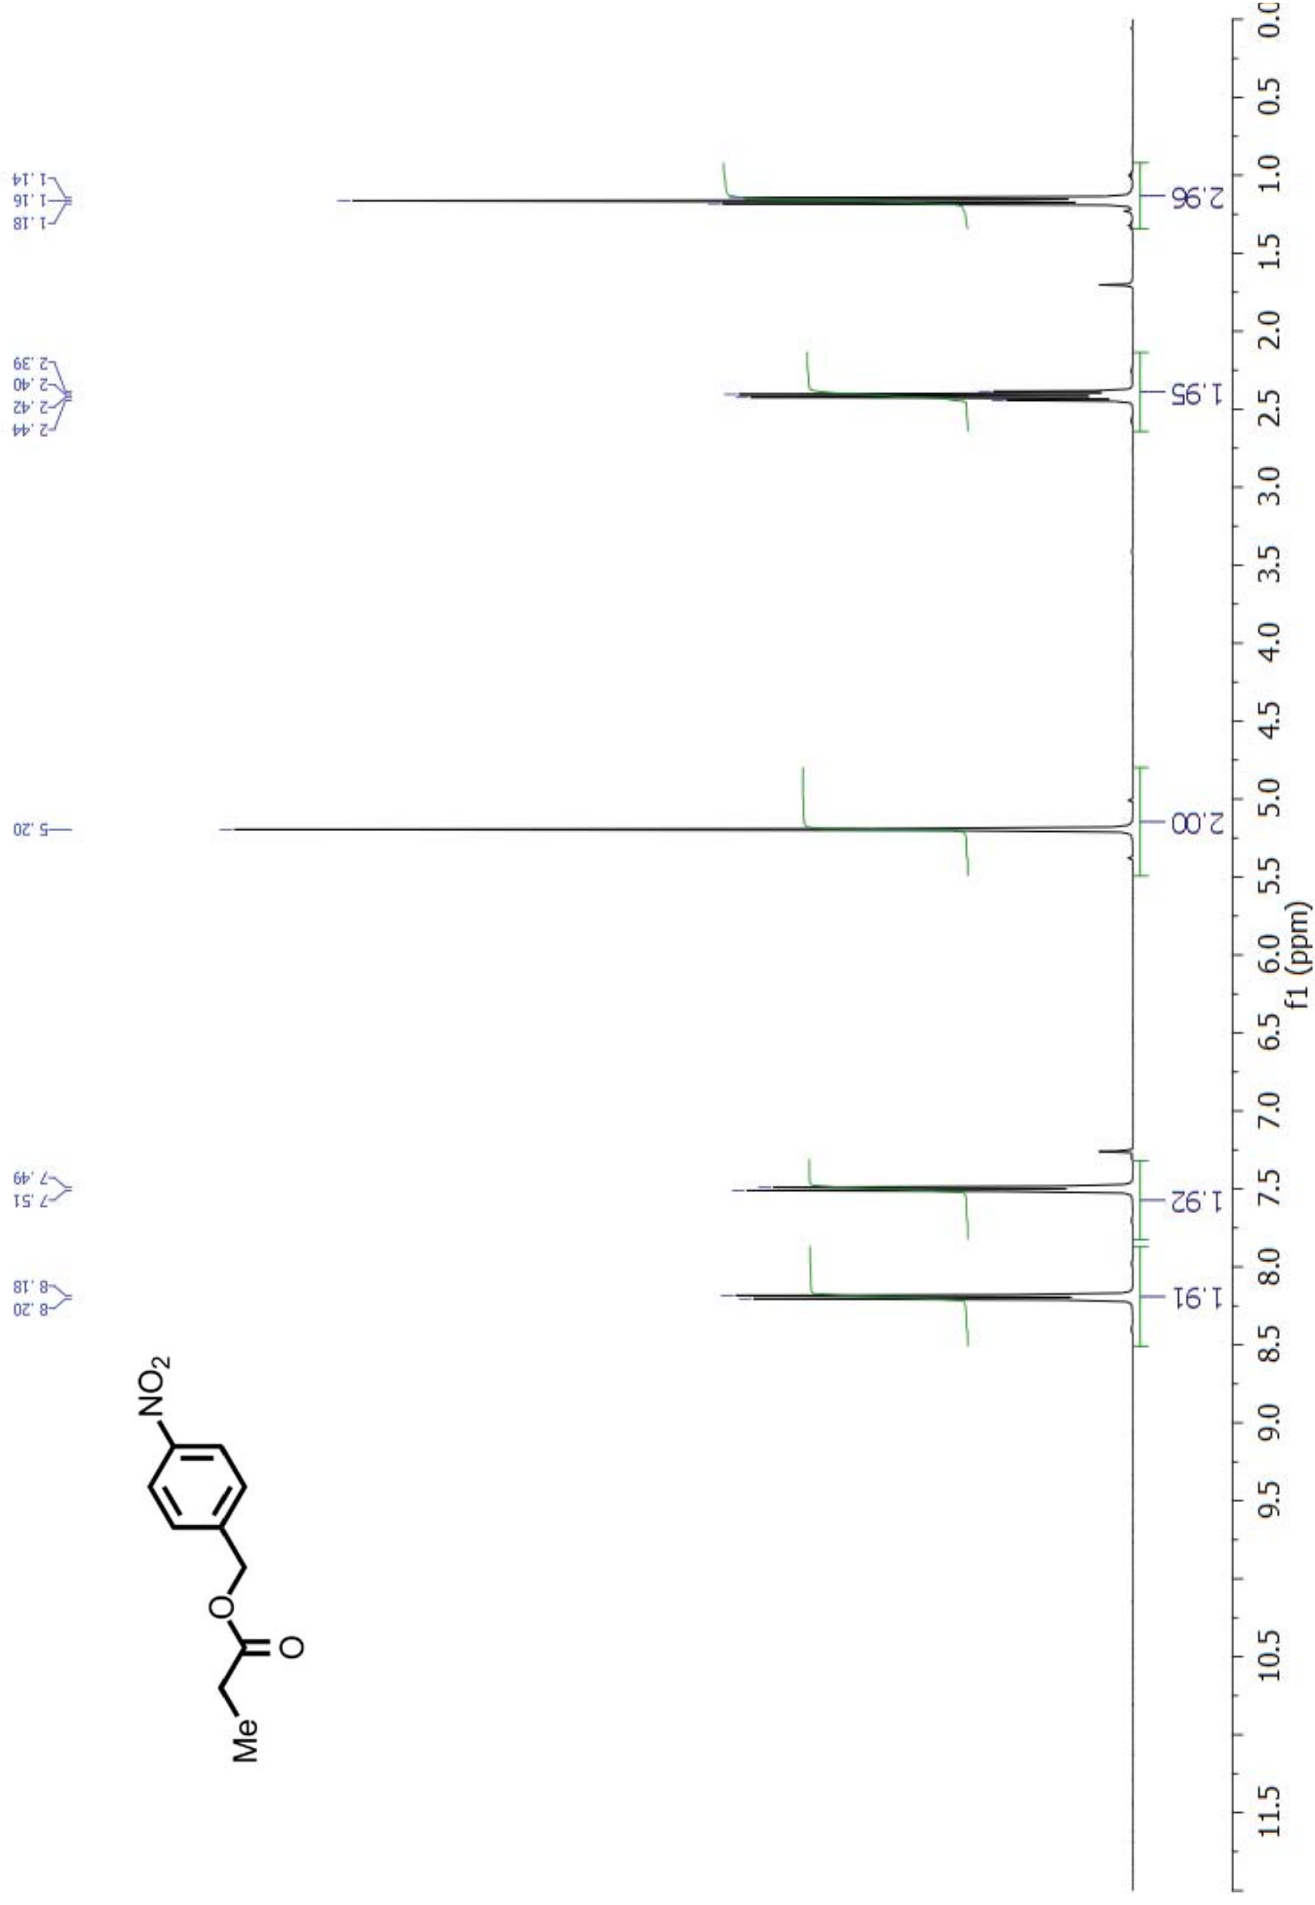

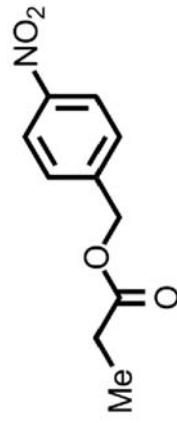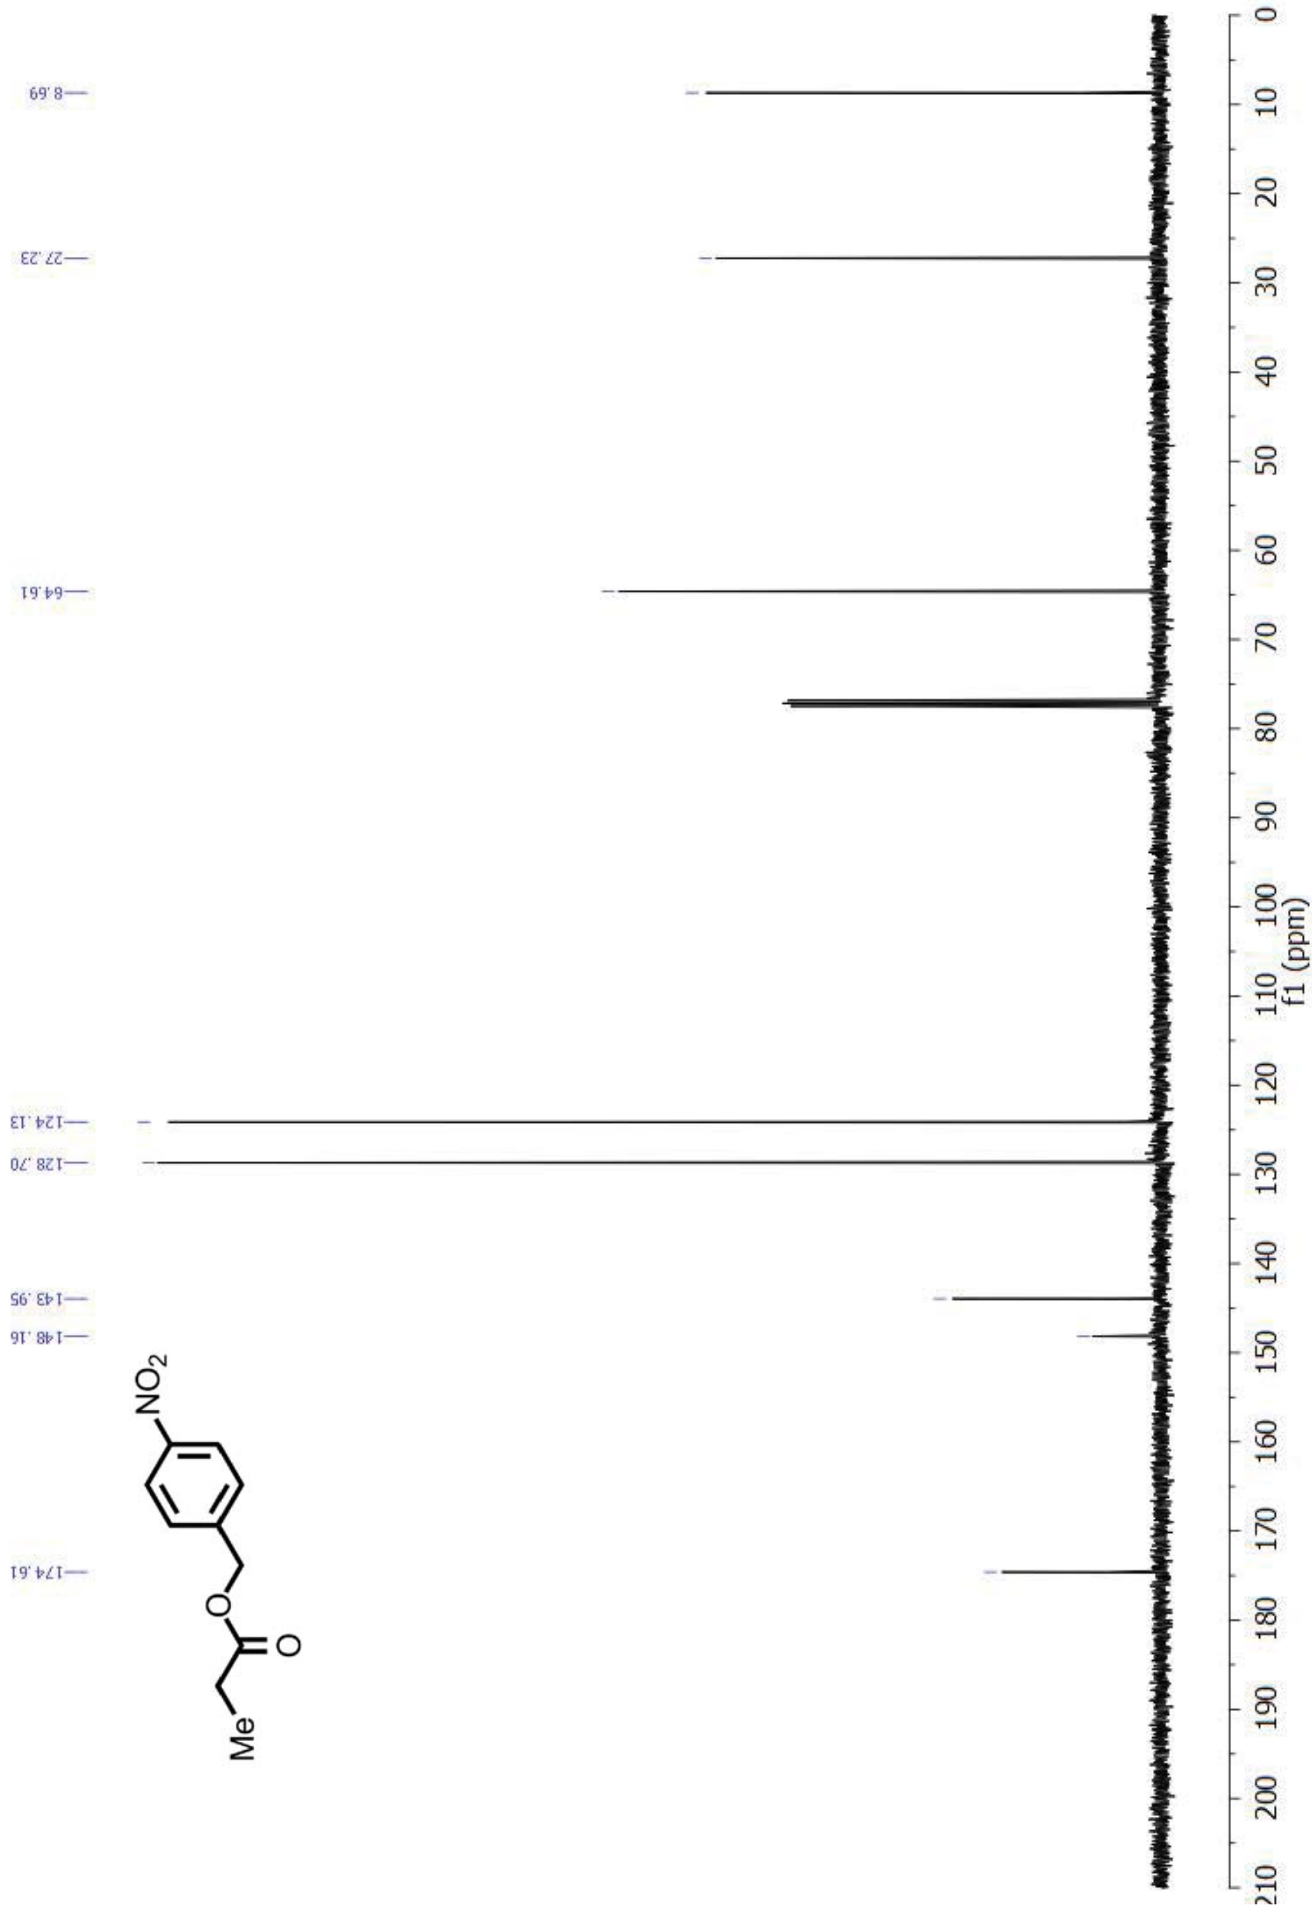

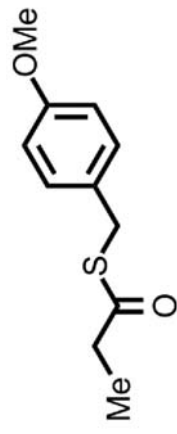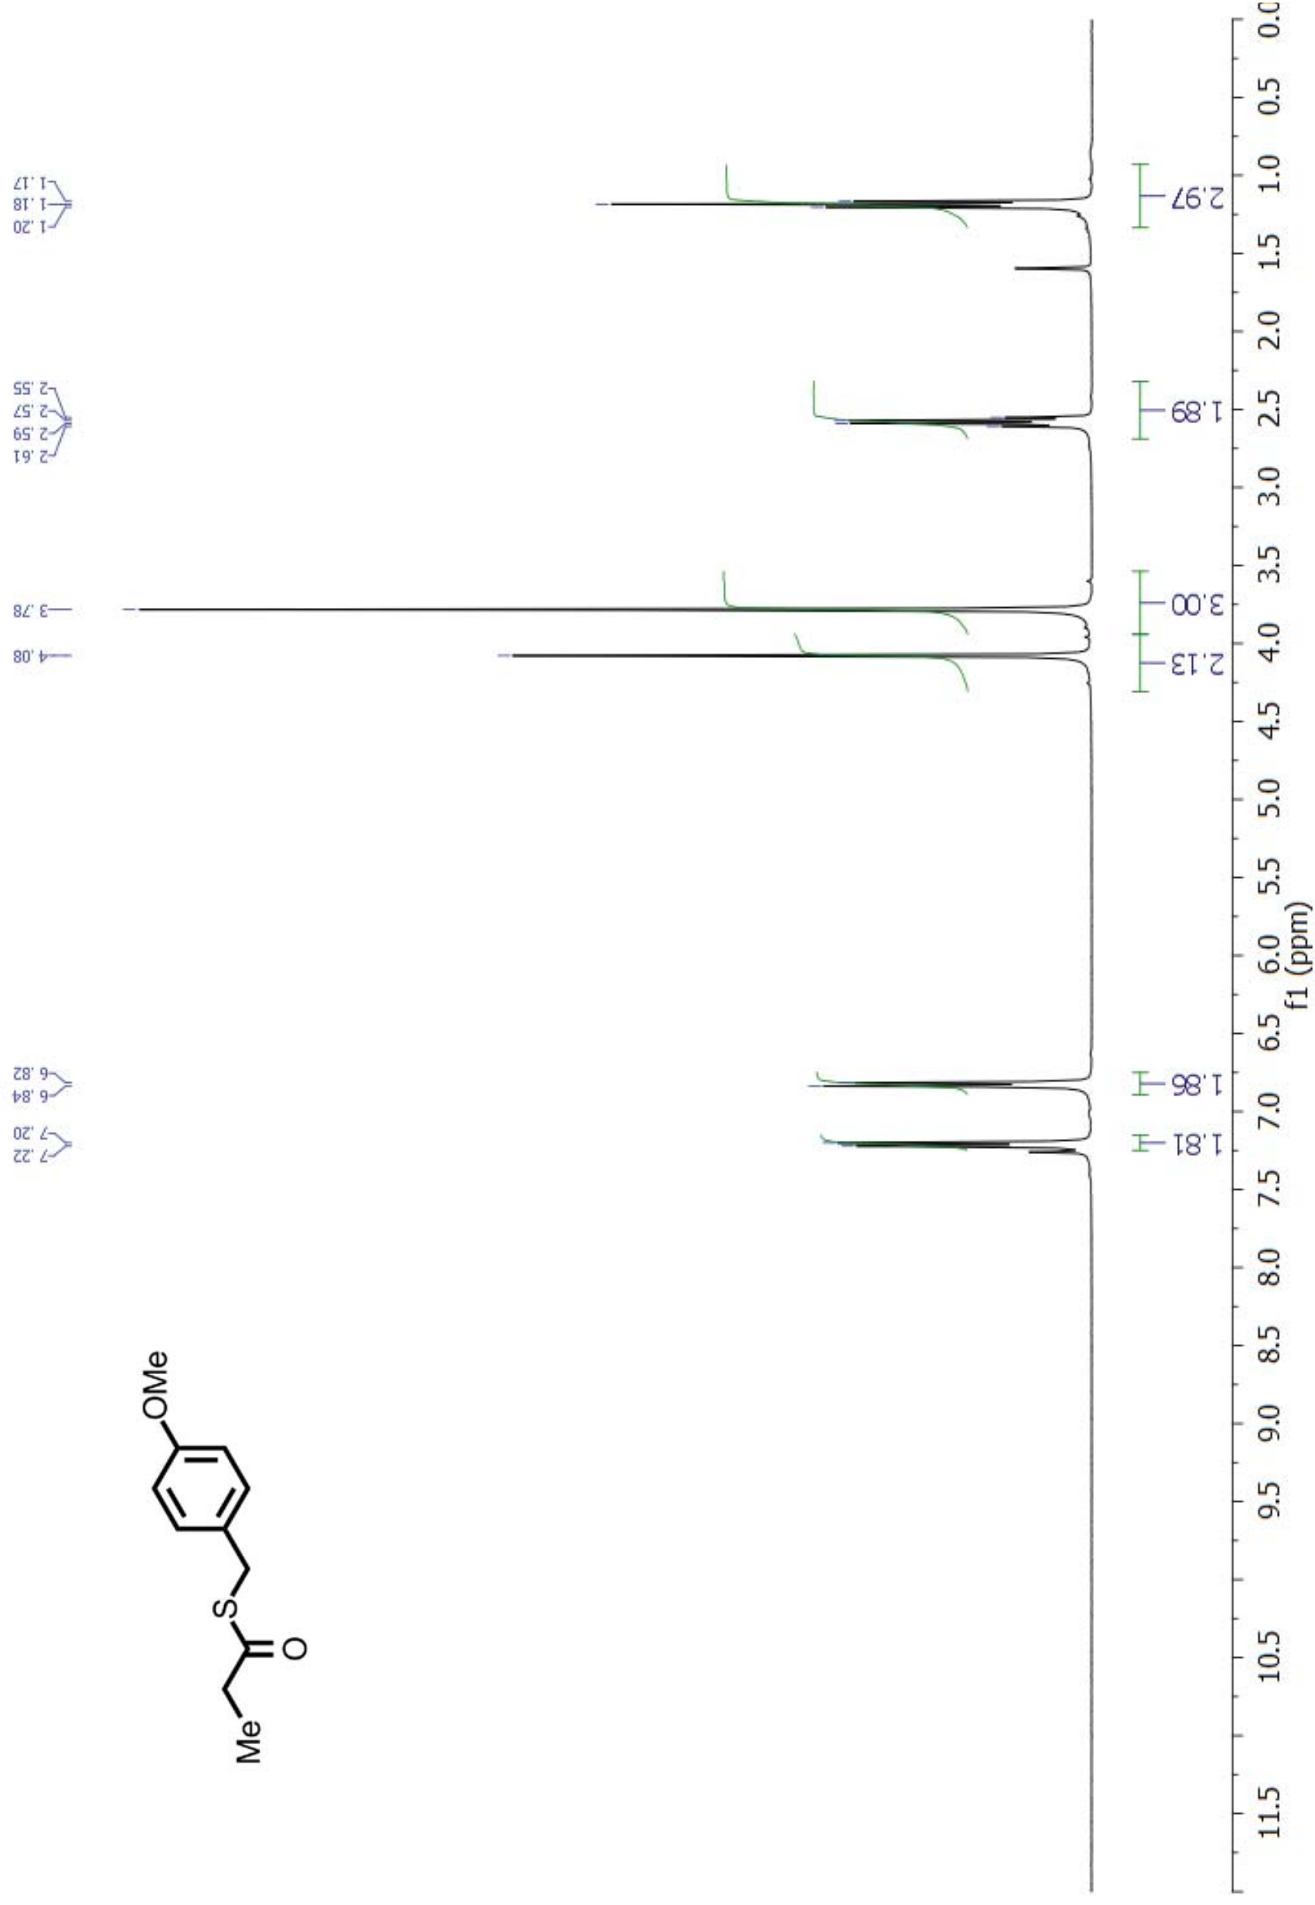

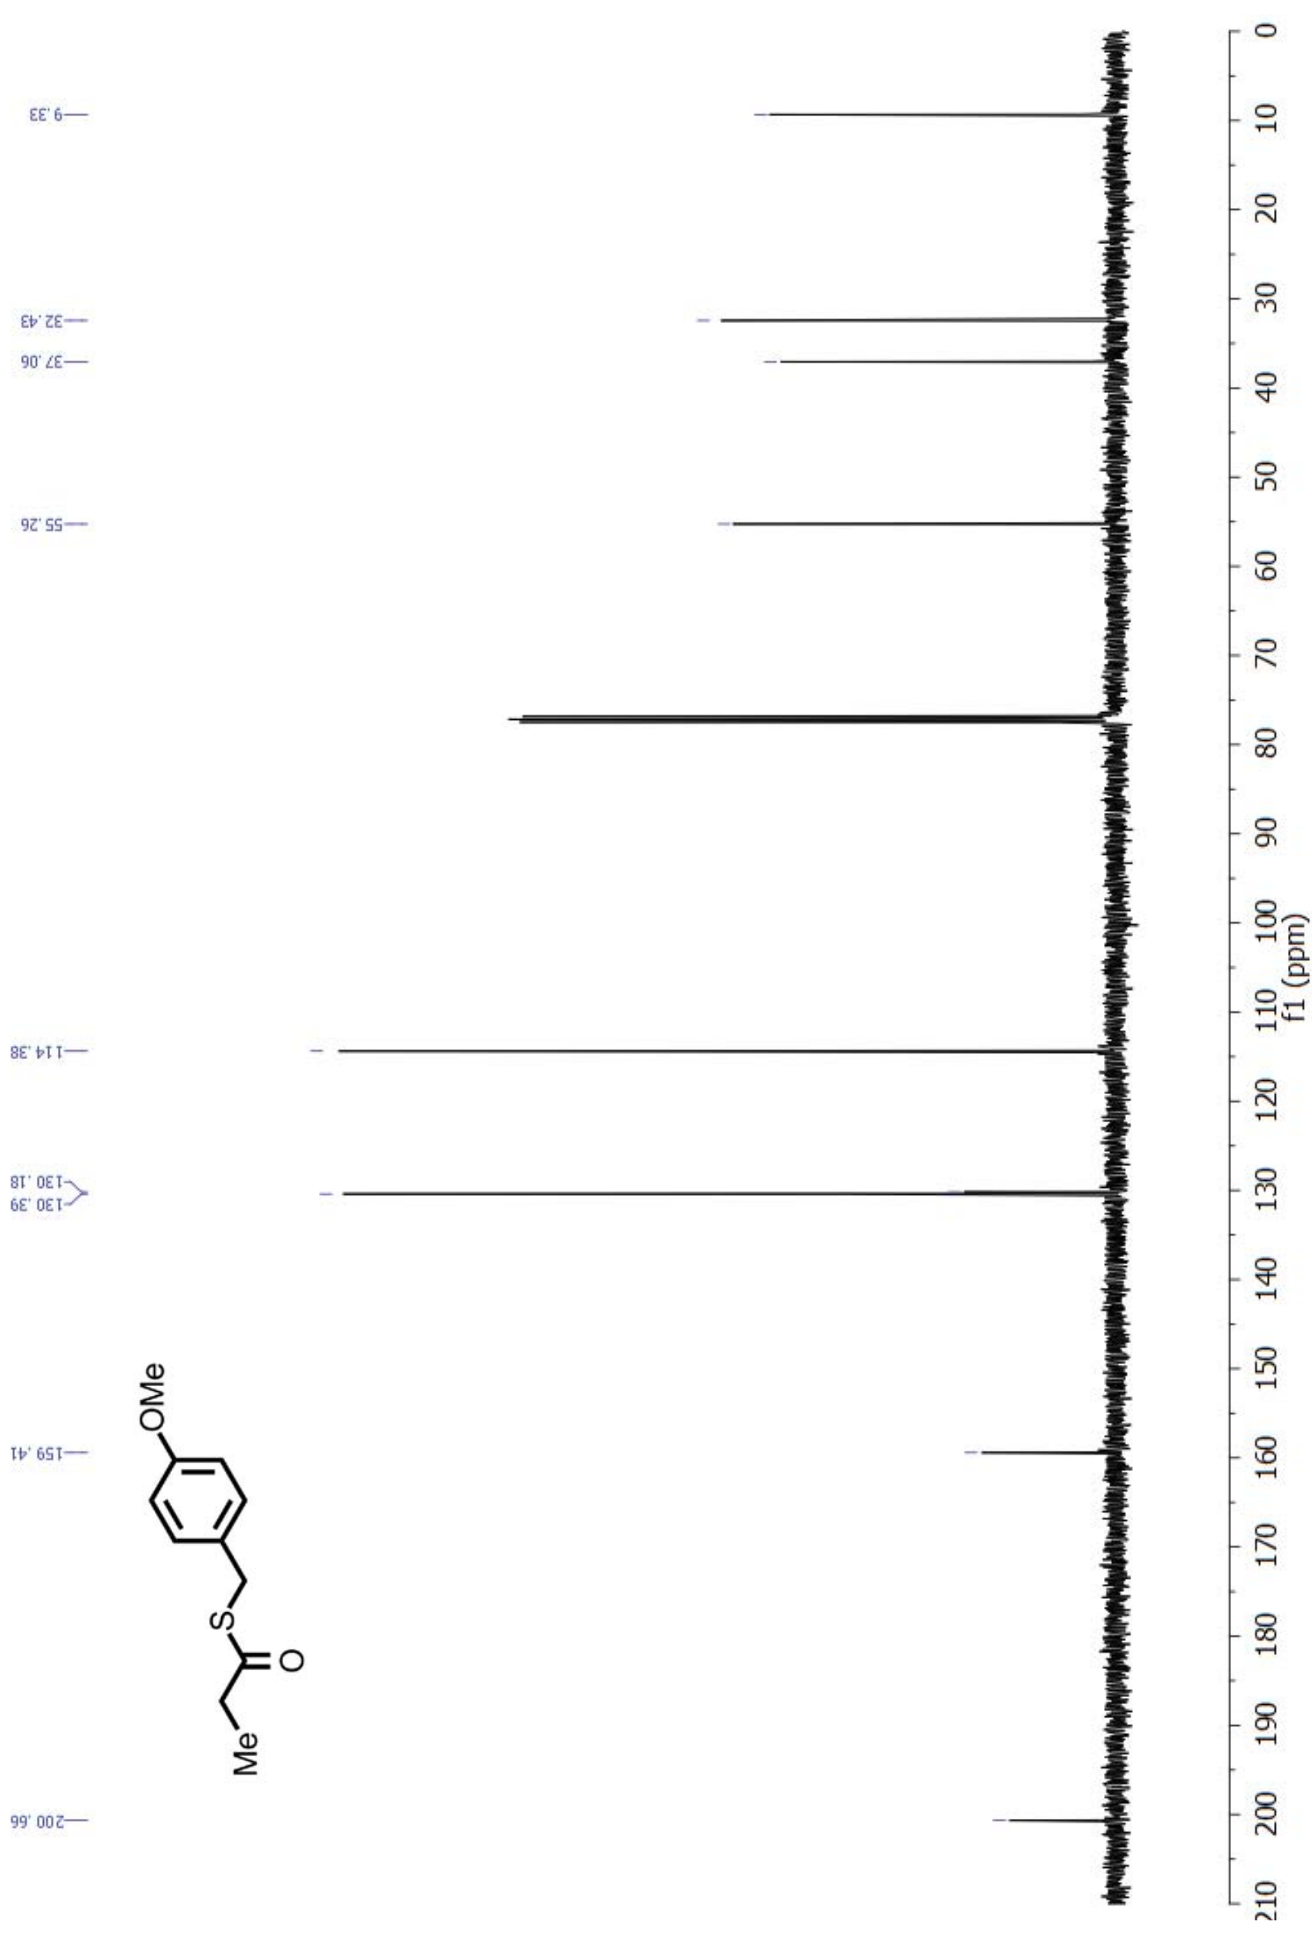

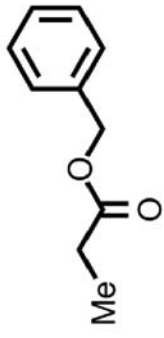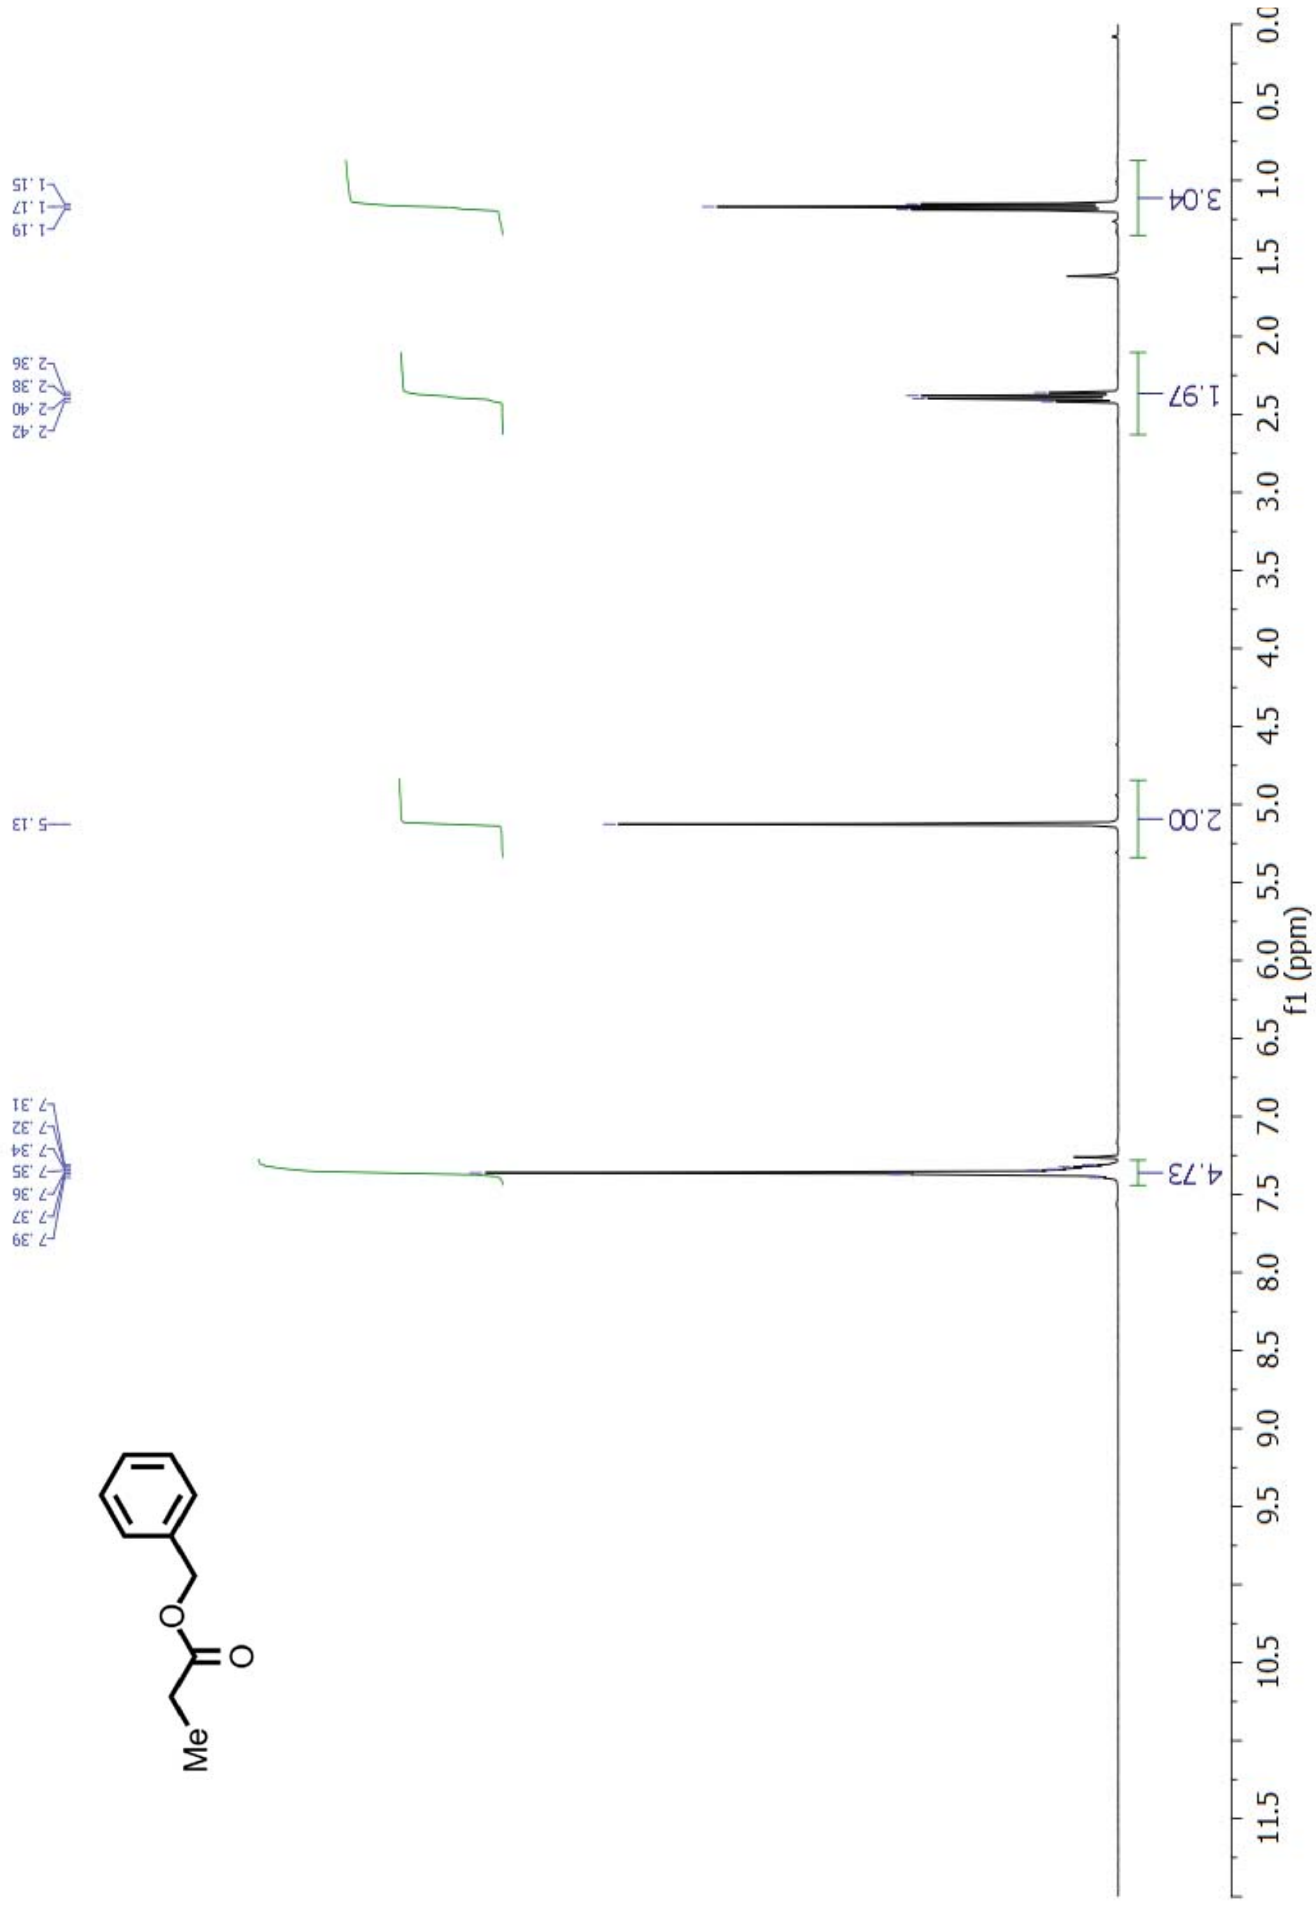

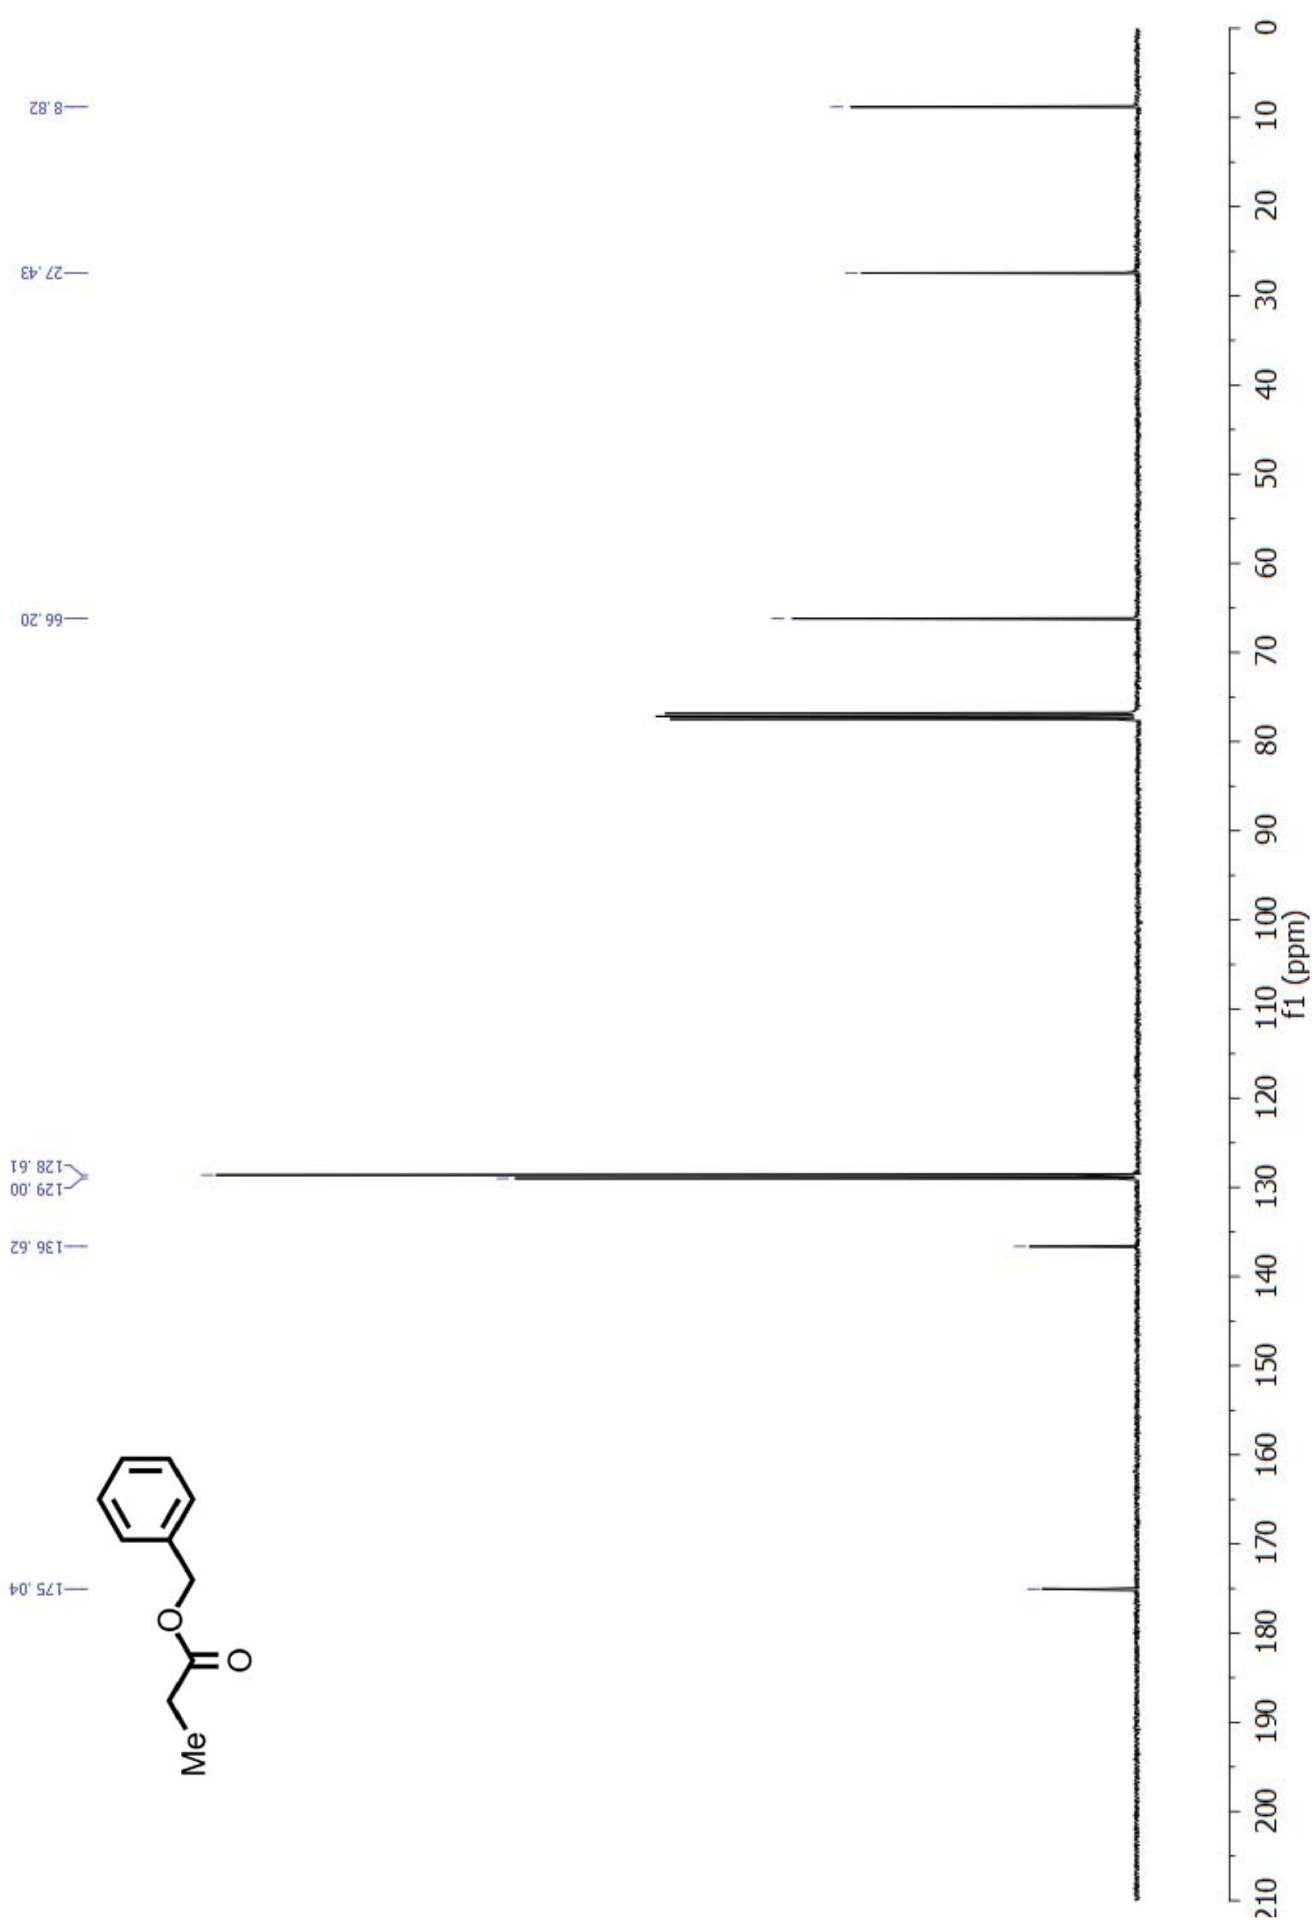

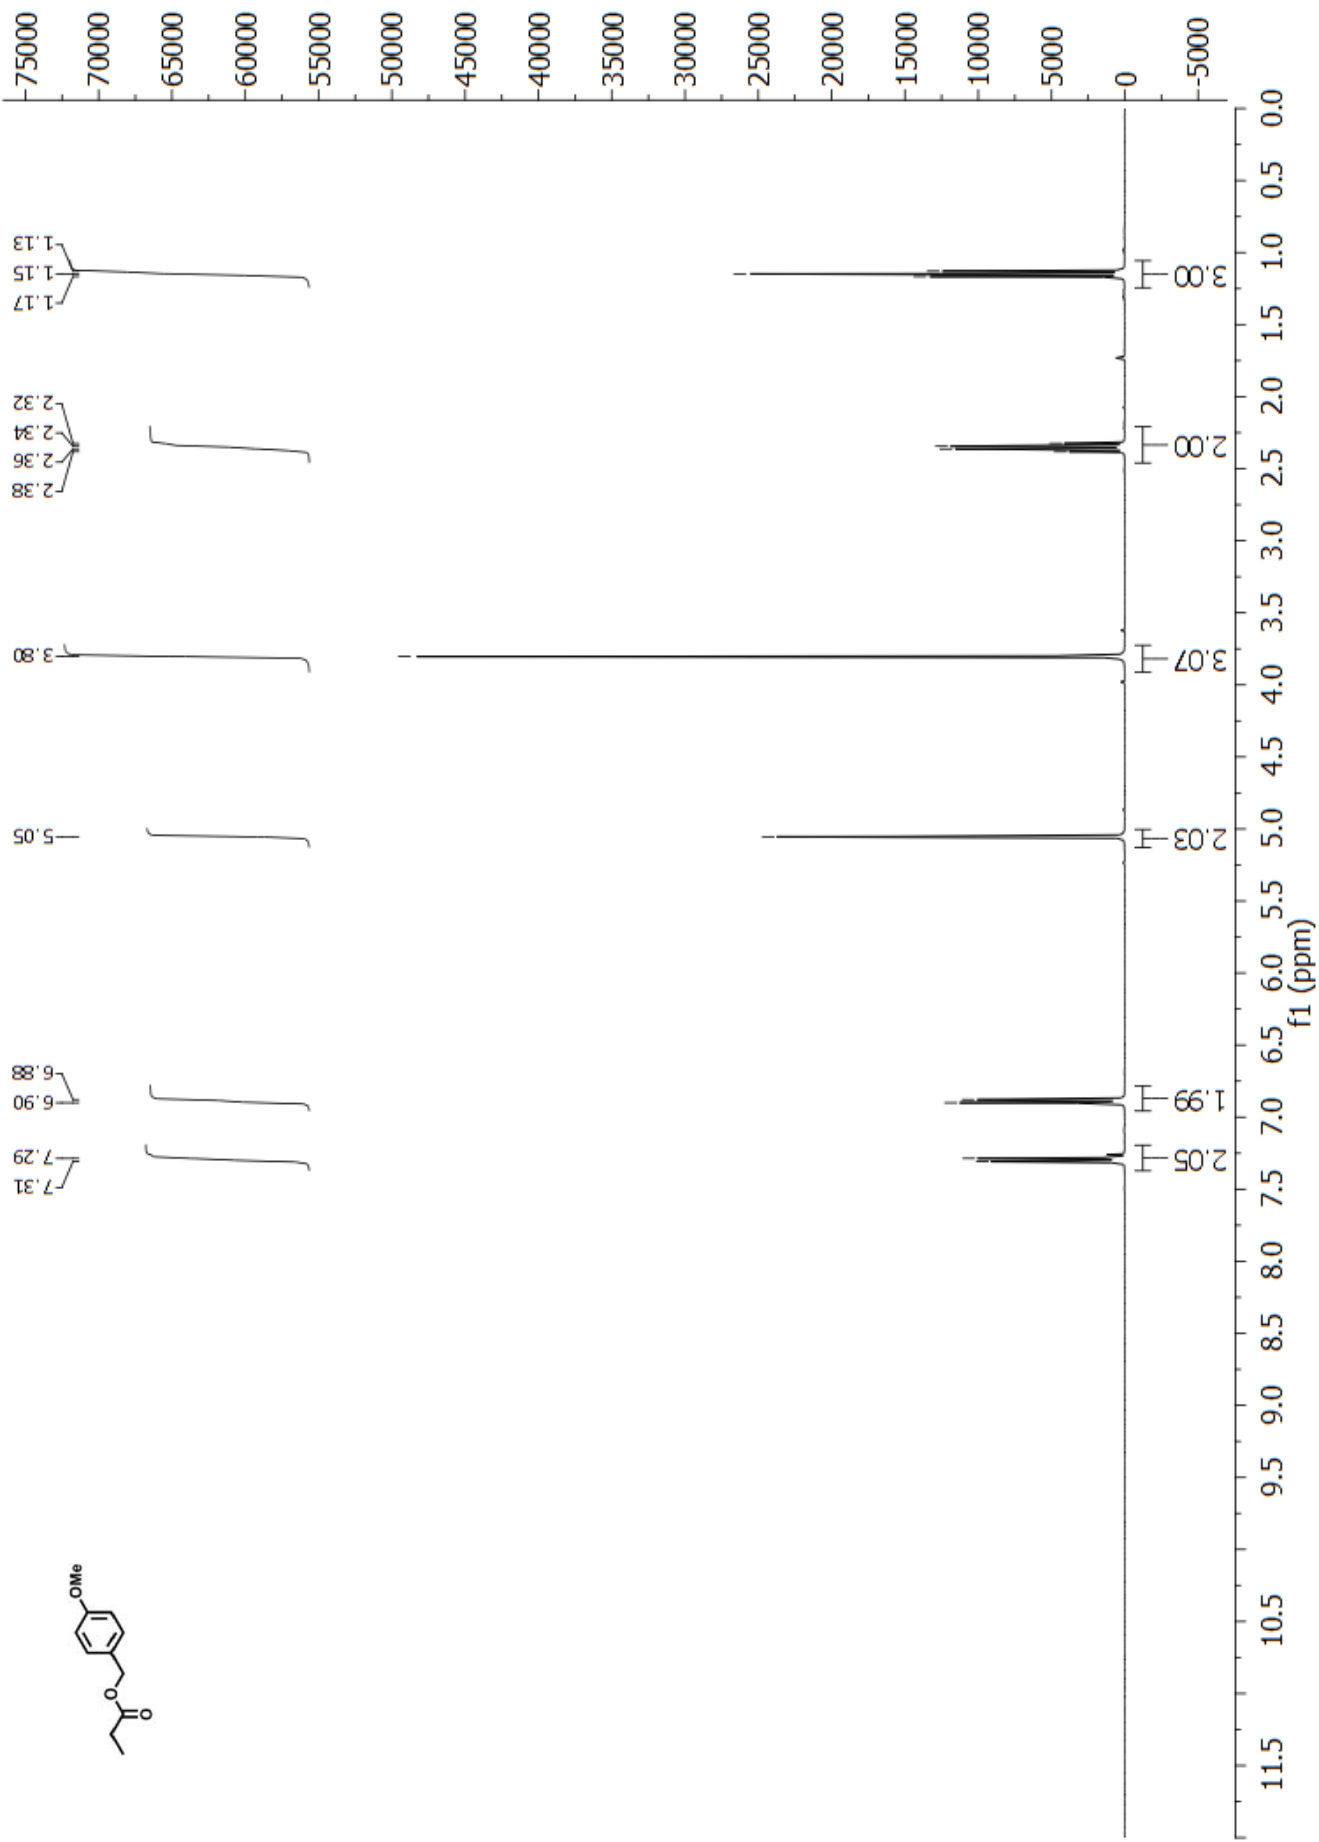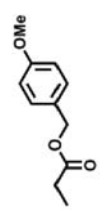

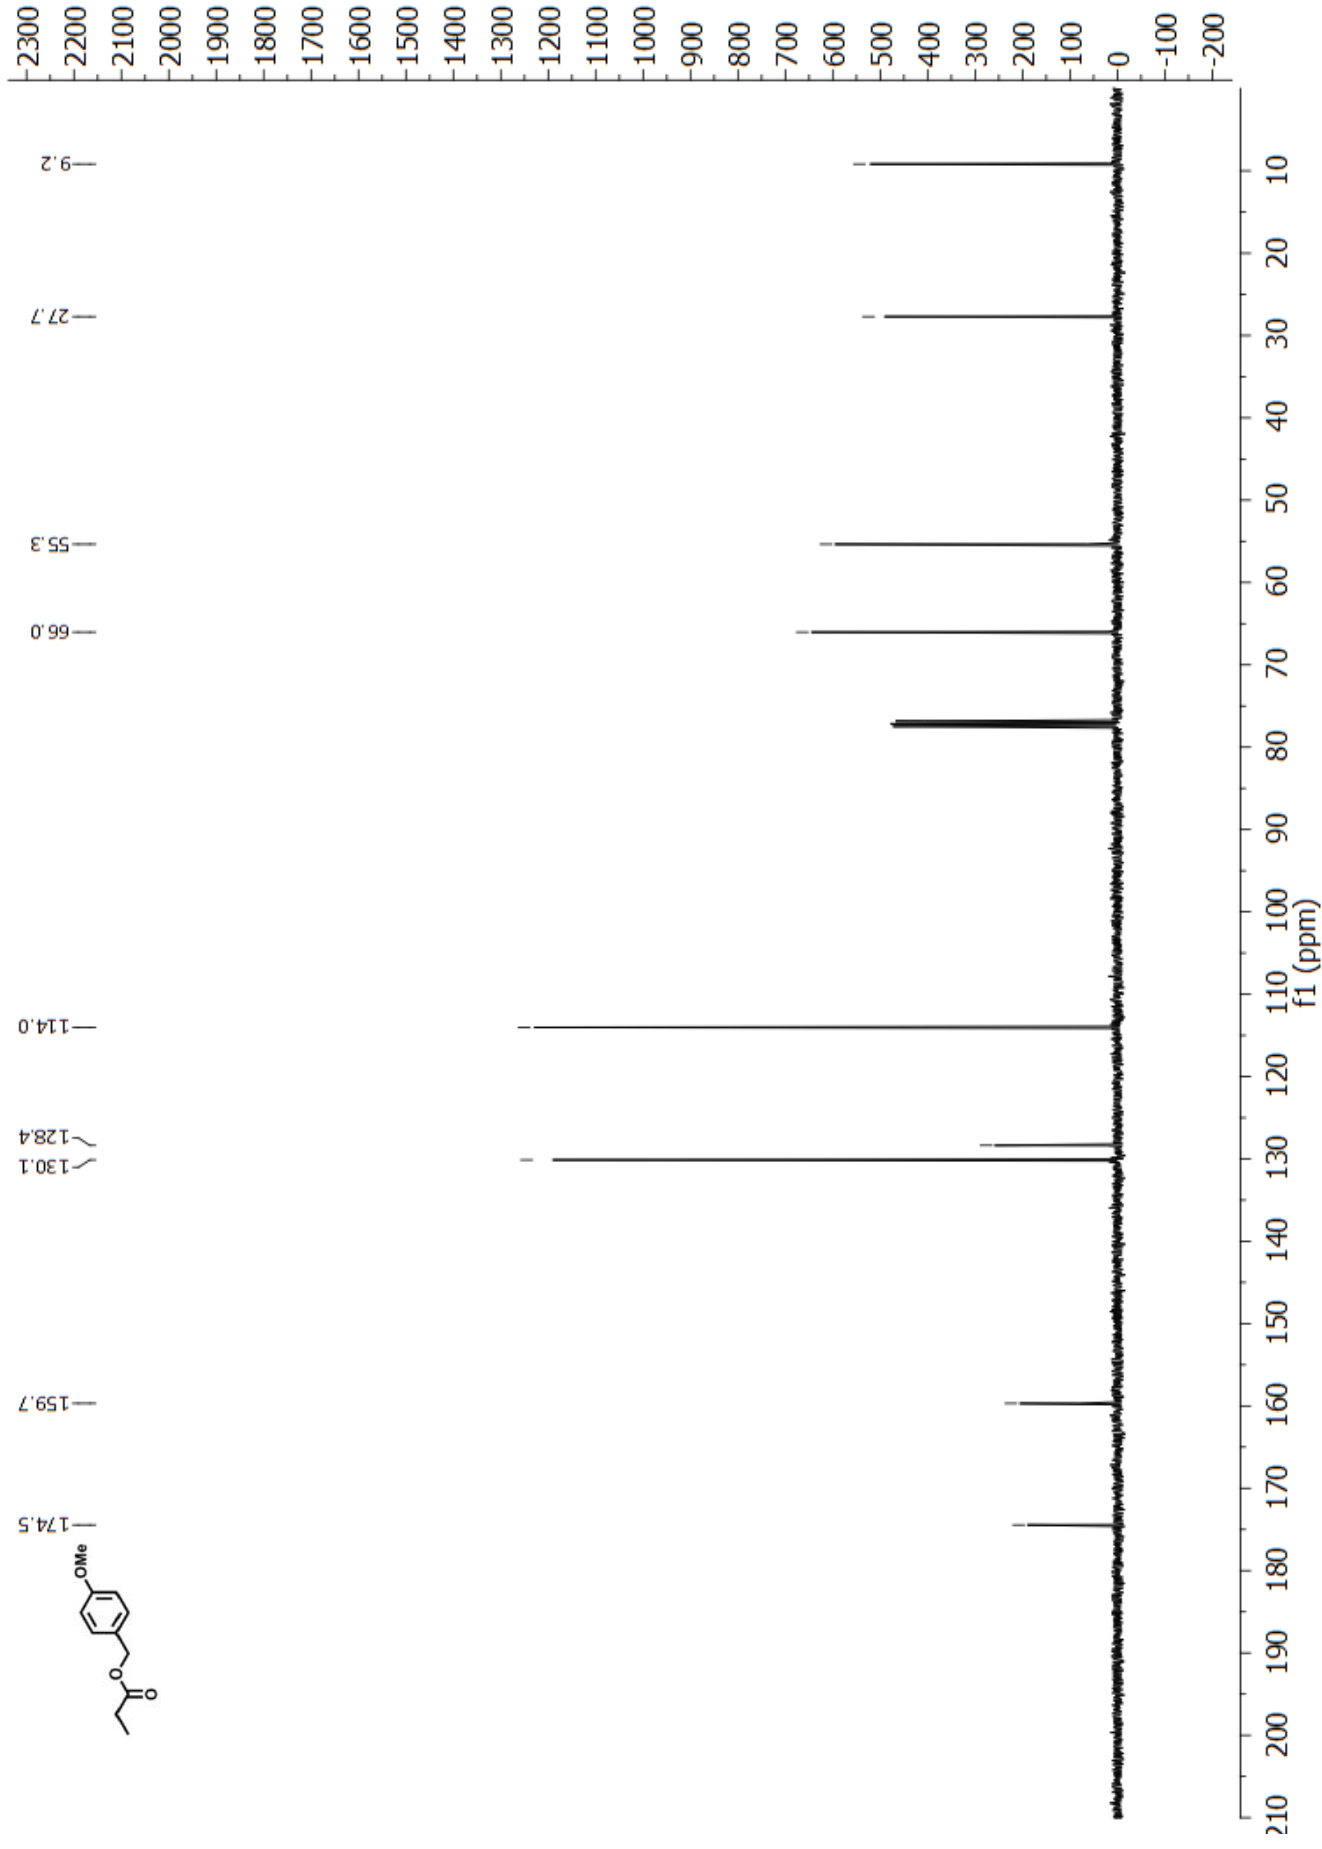

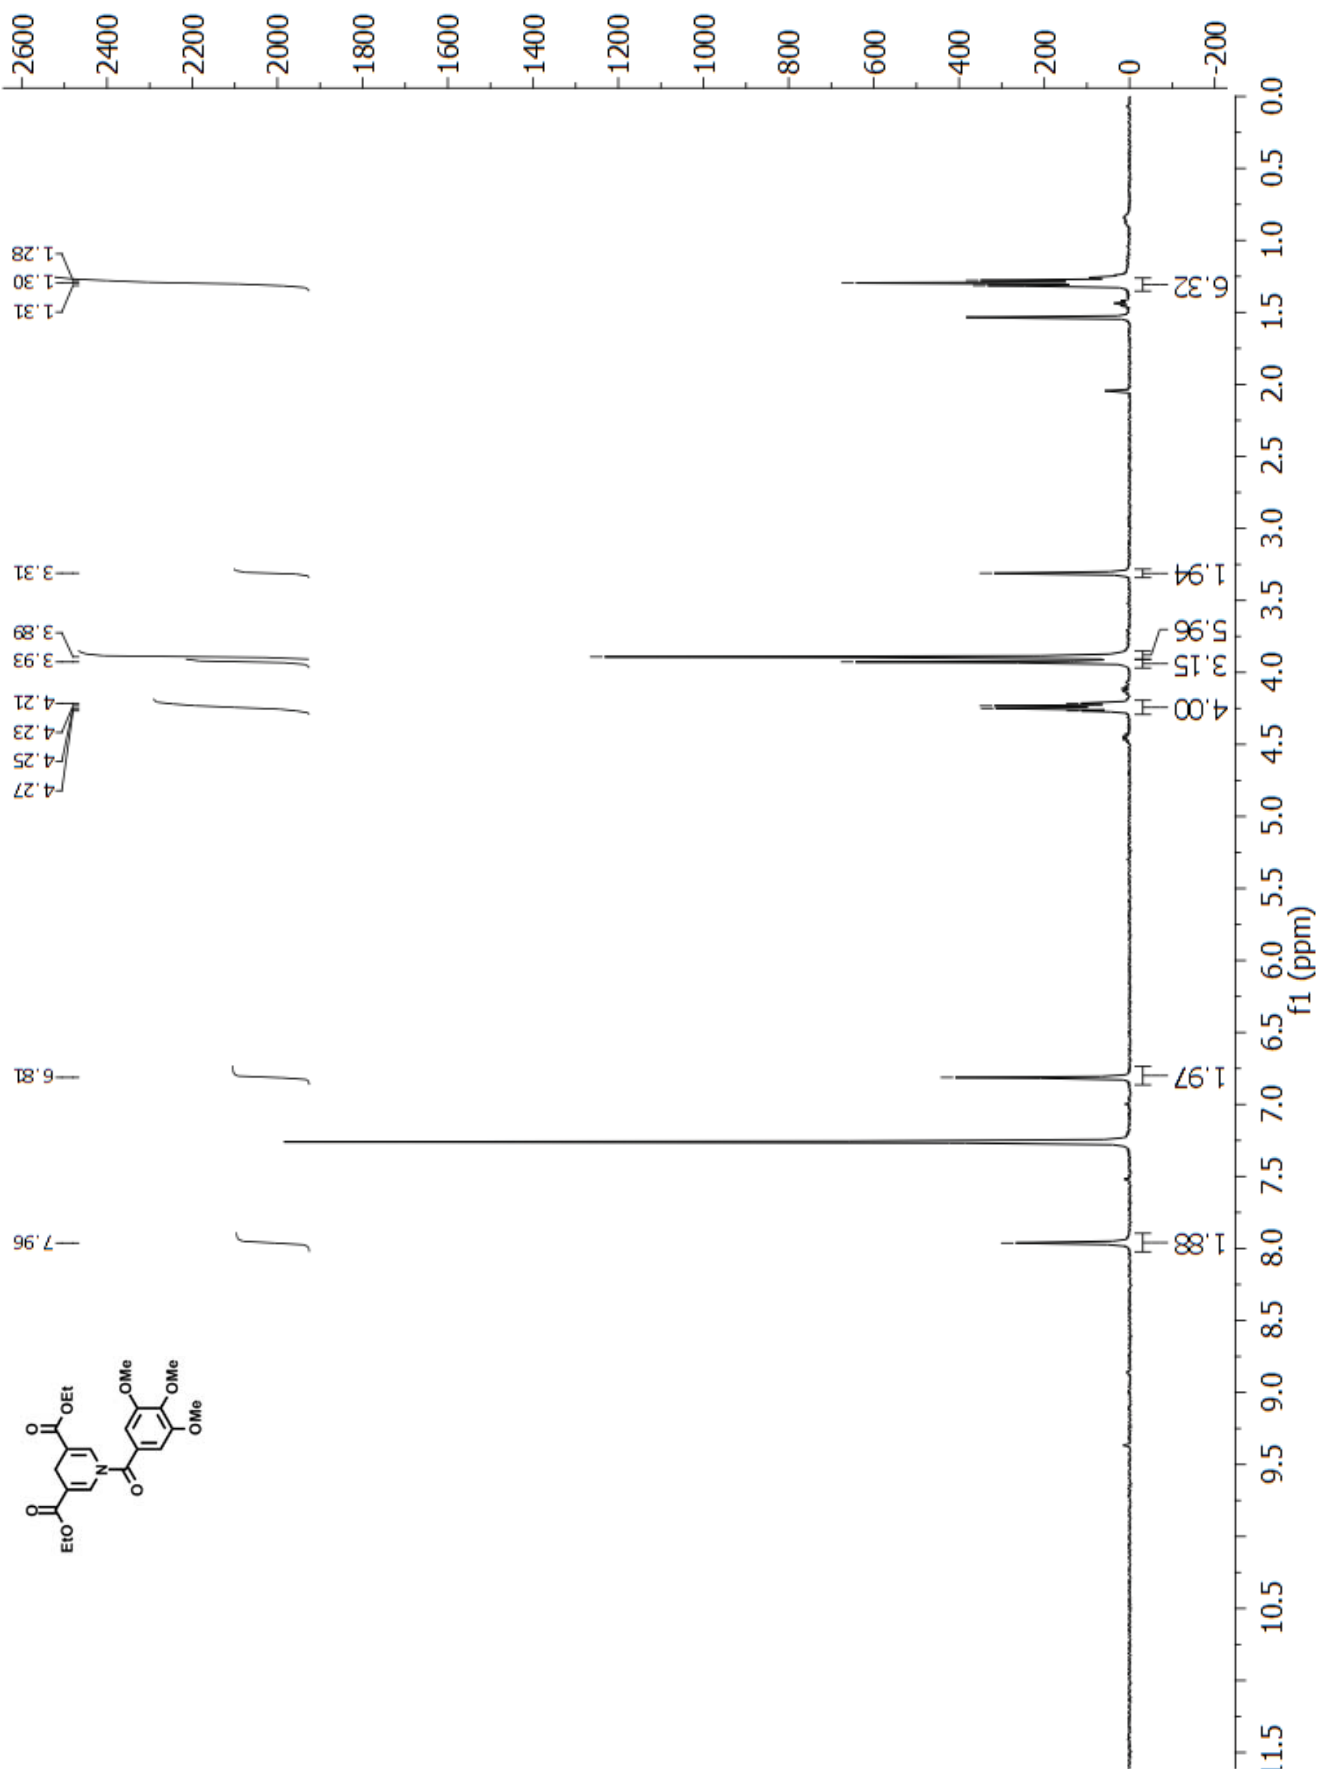

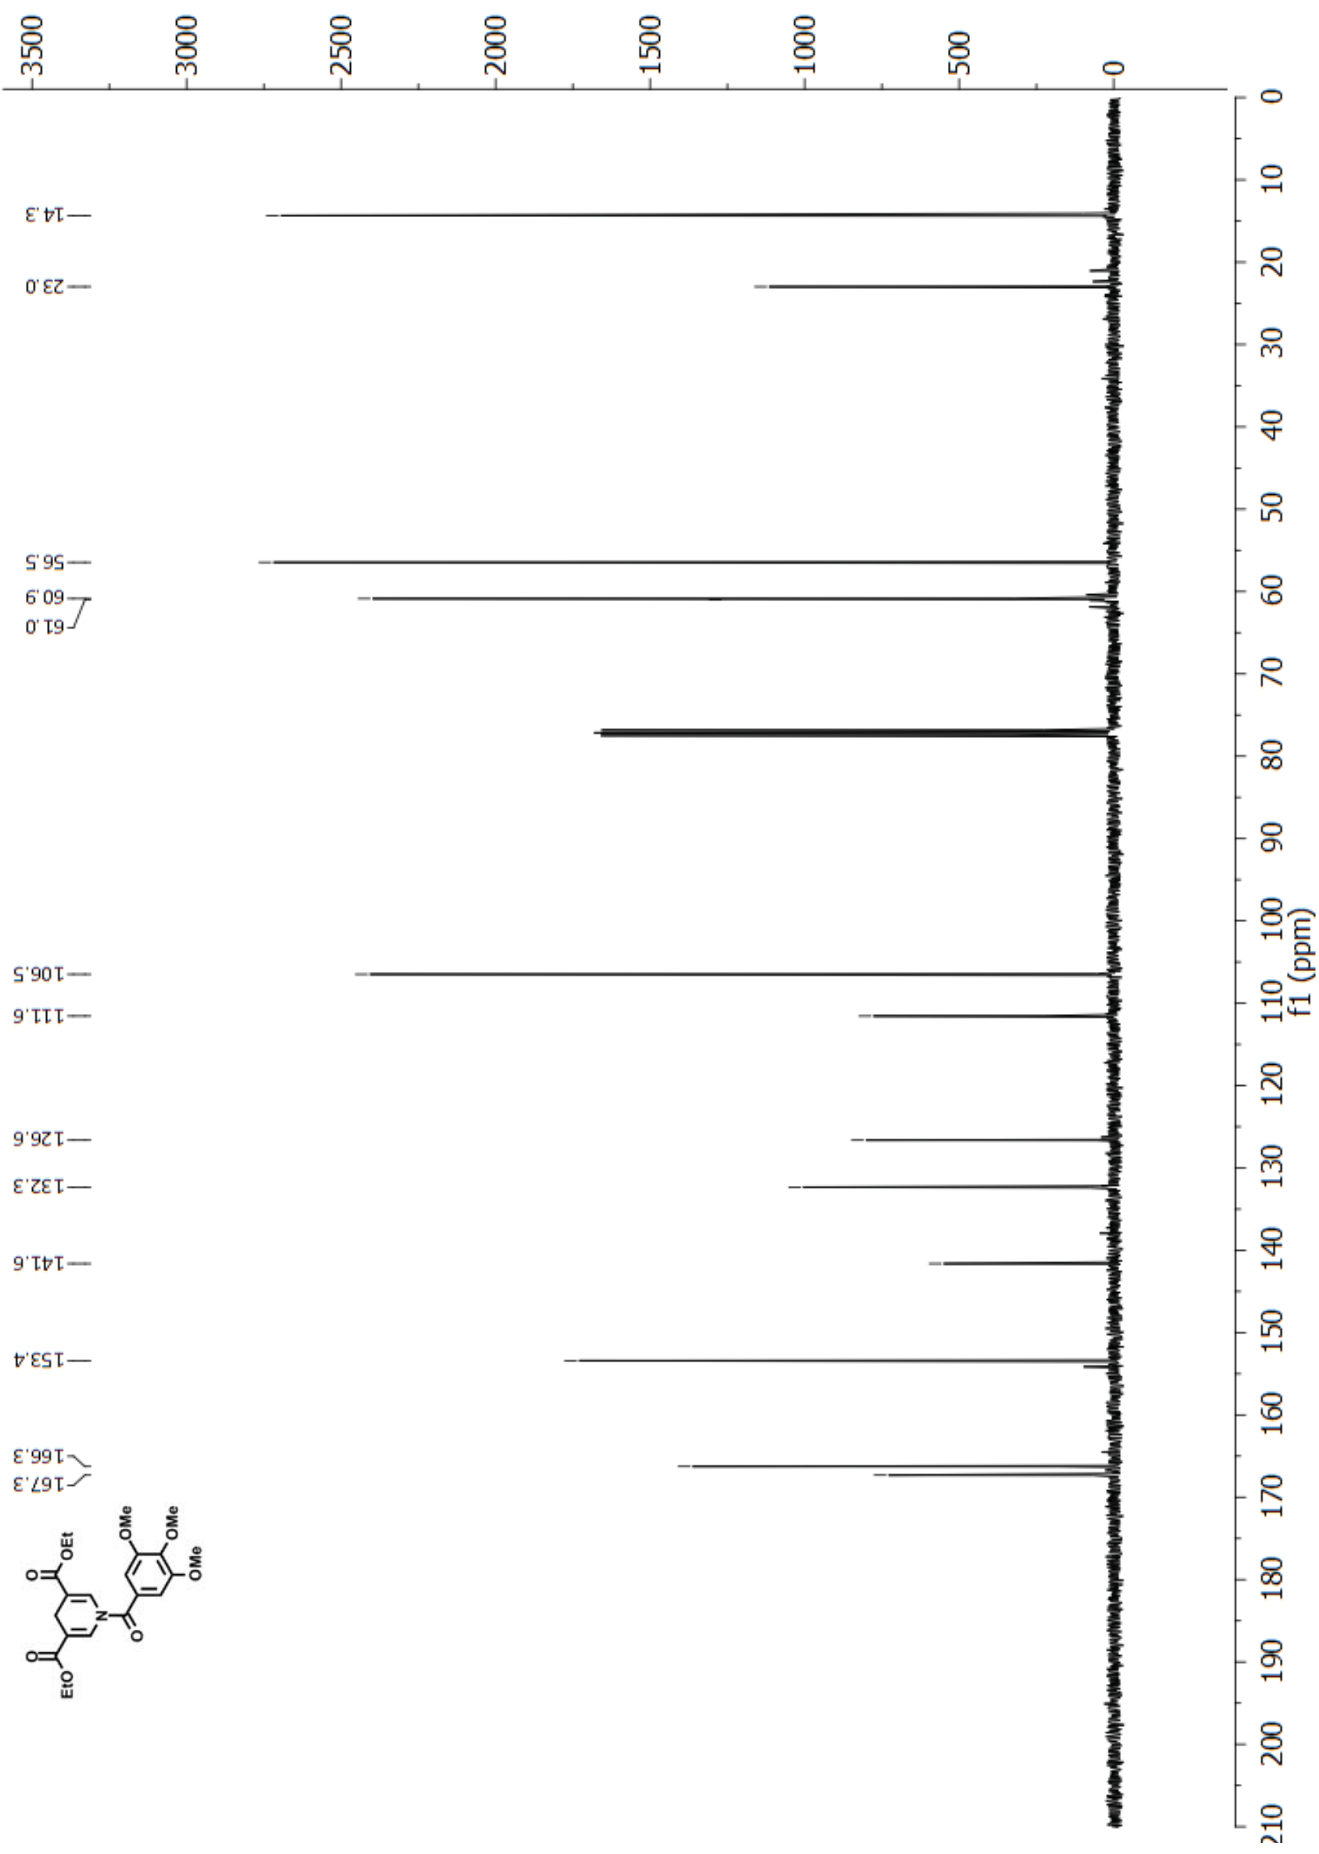

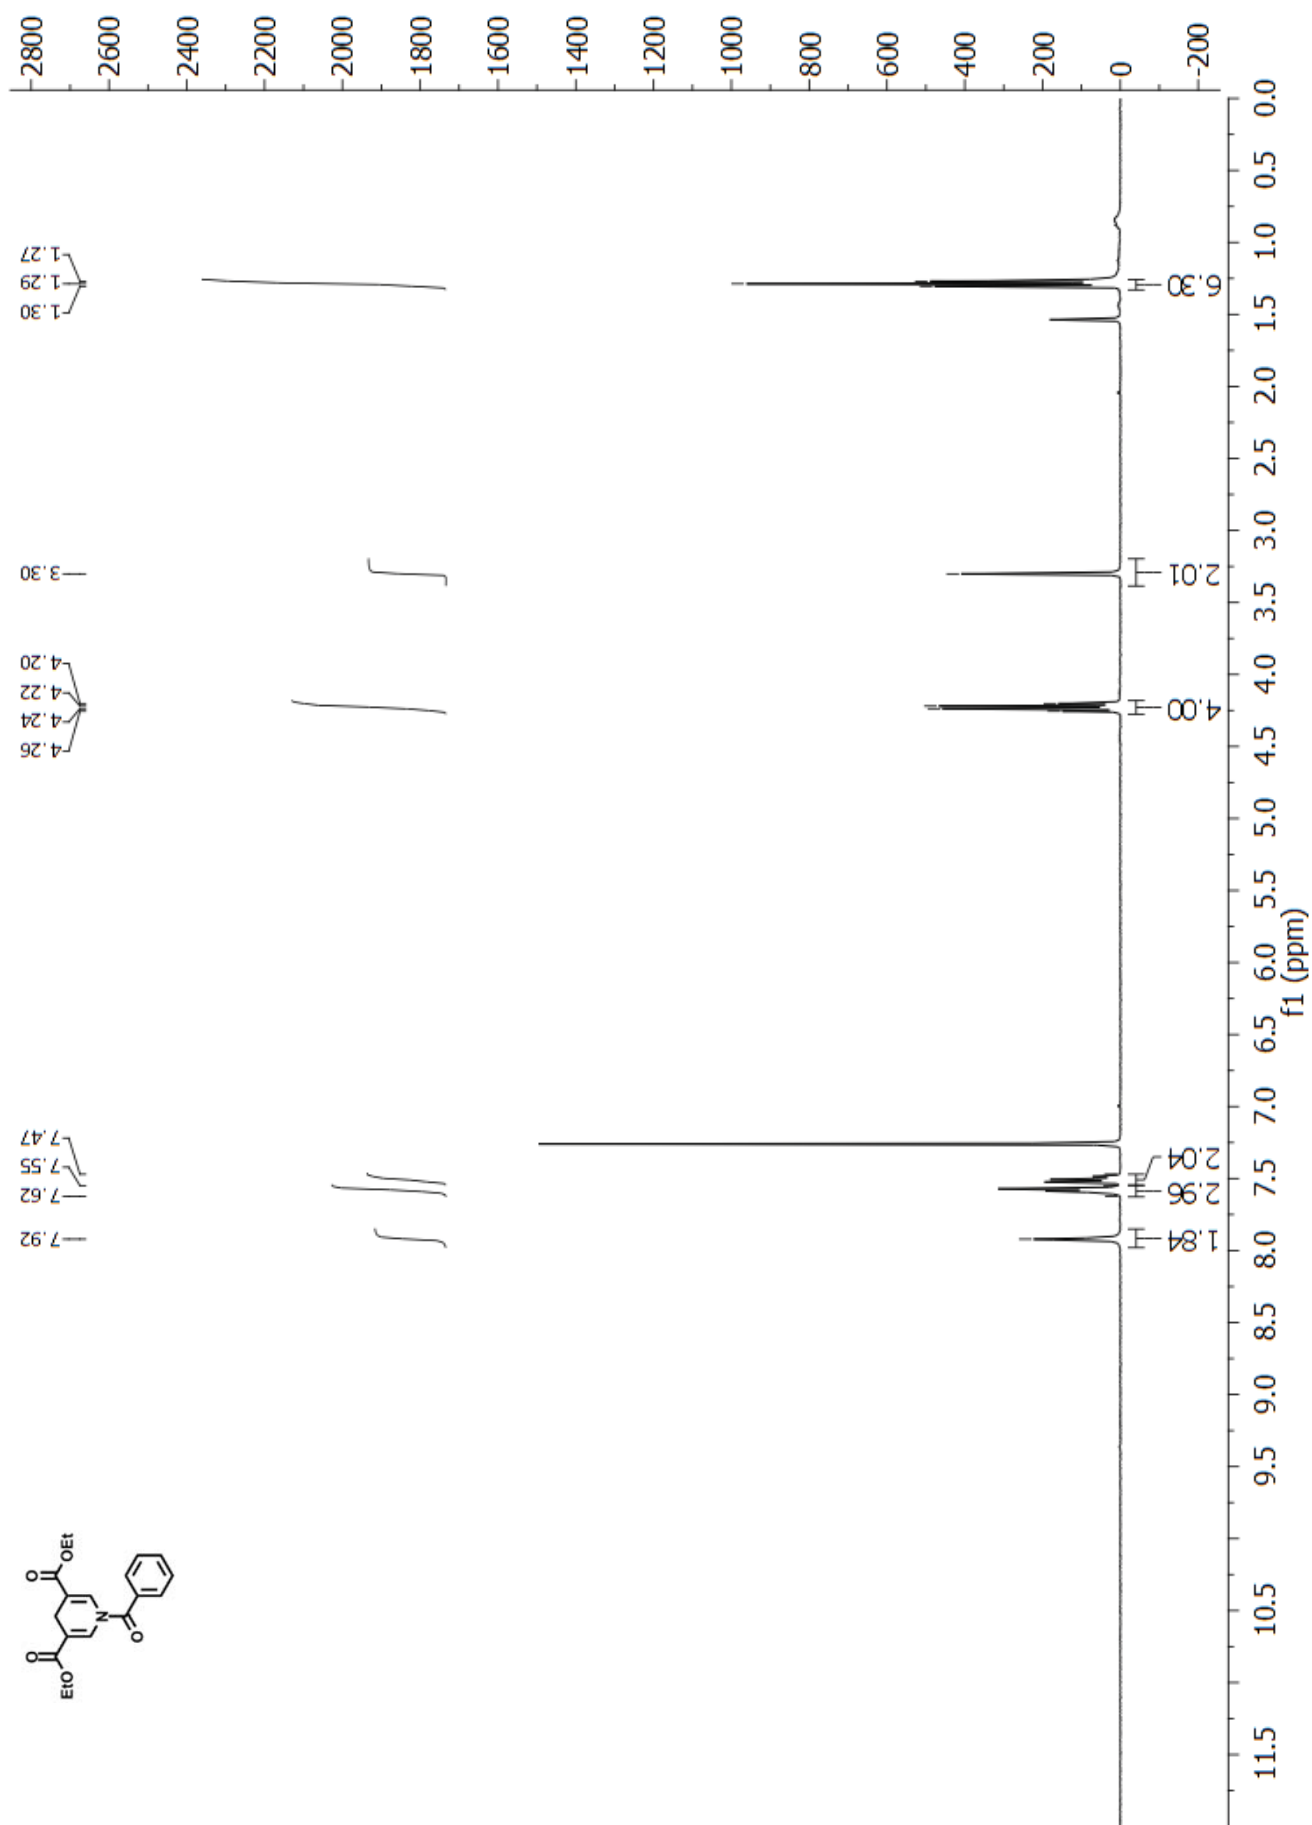

6.33  
1.27  
1.29  
1.30

3.30

4.20  
4.22  
4.24  
4.26

7.47  
7.55  
7.62  
7.92

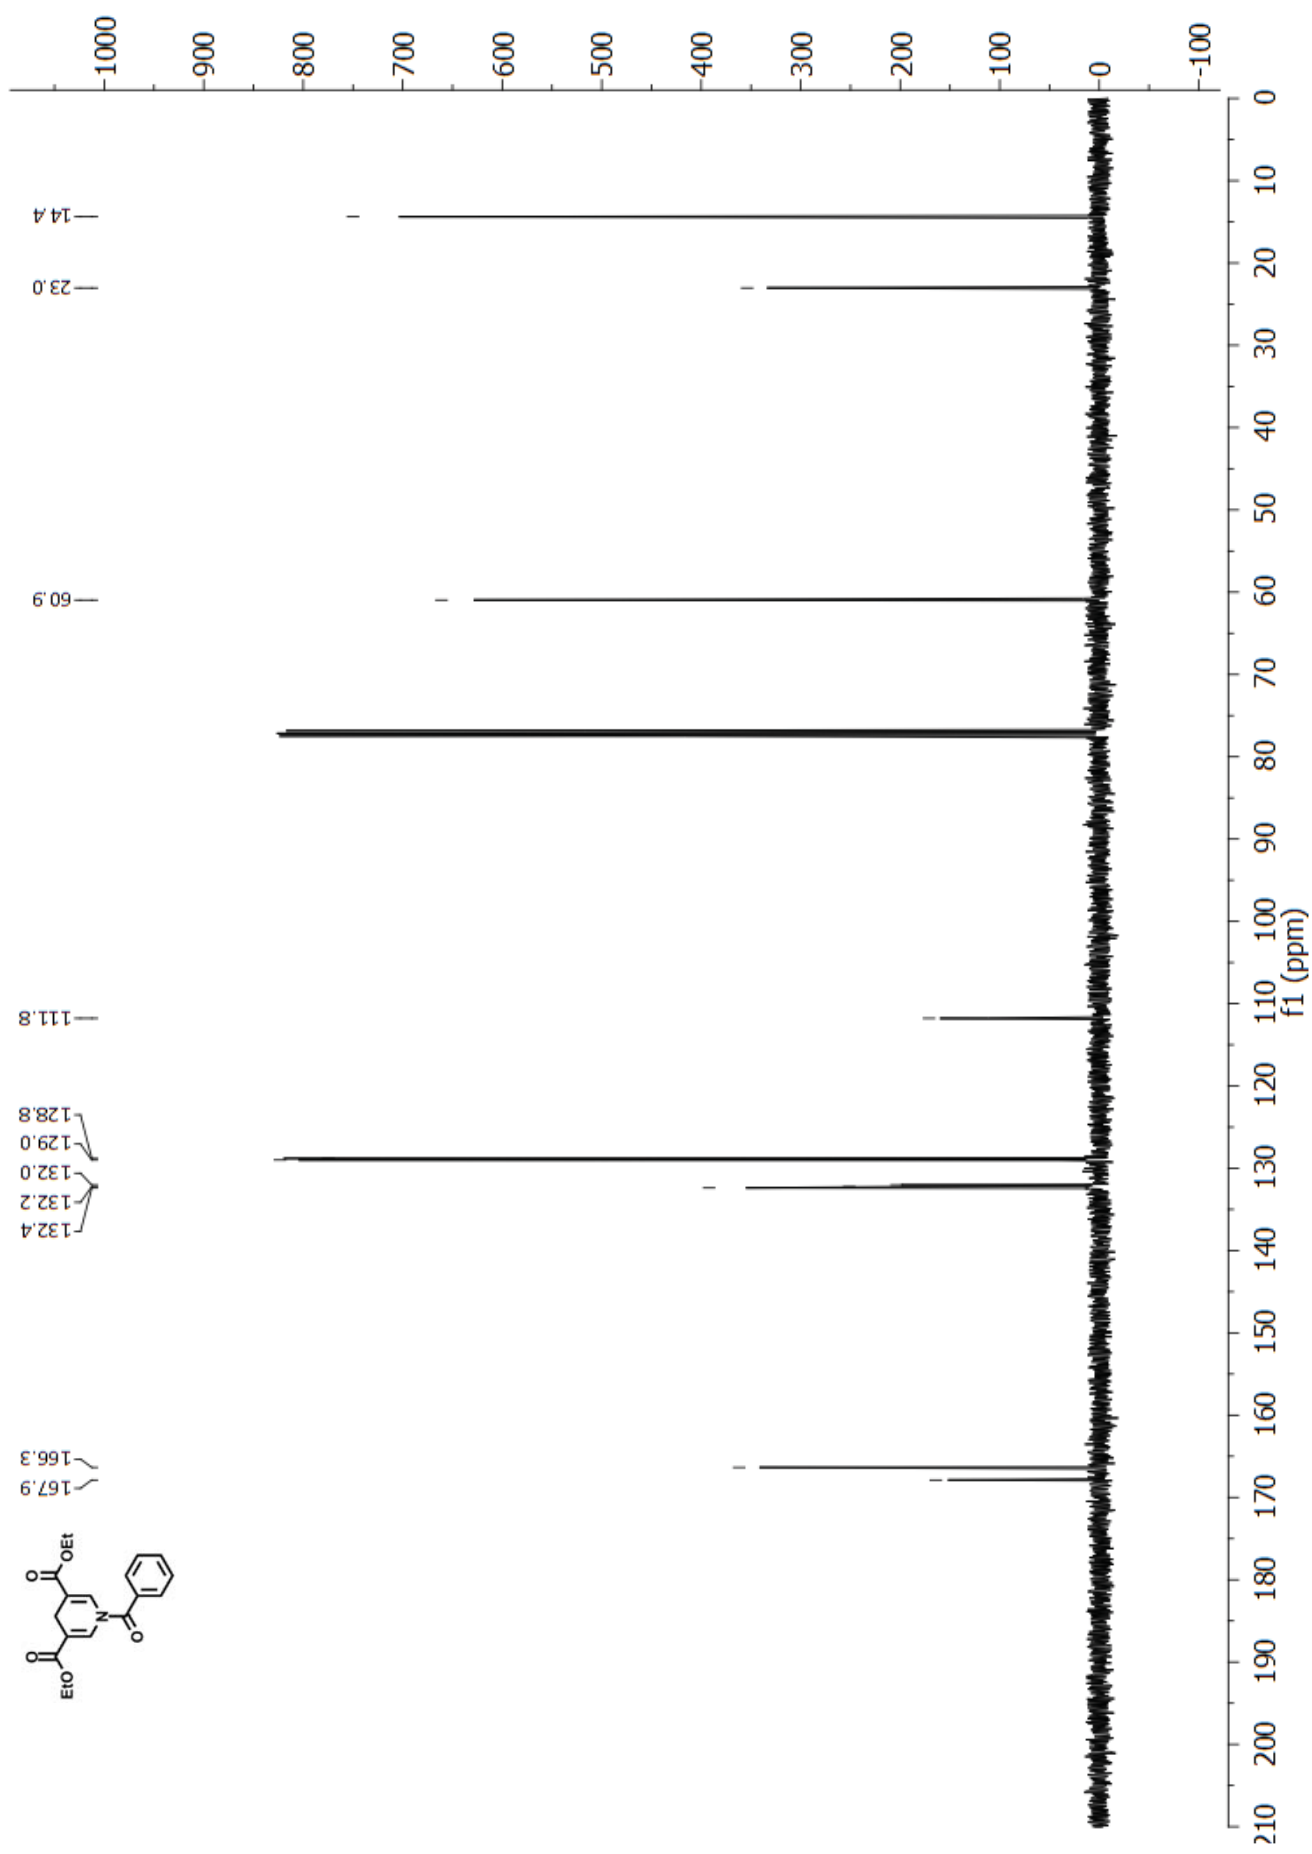

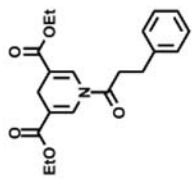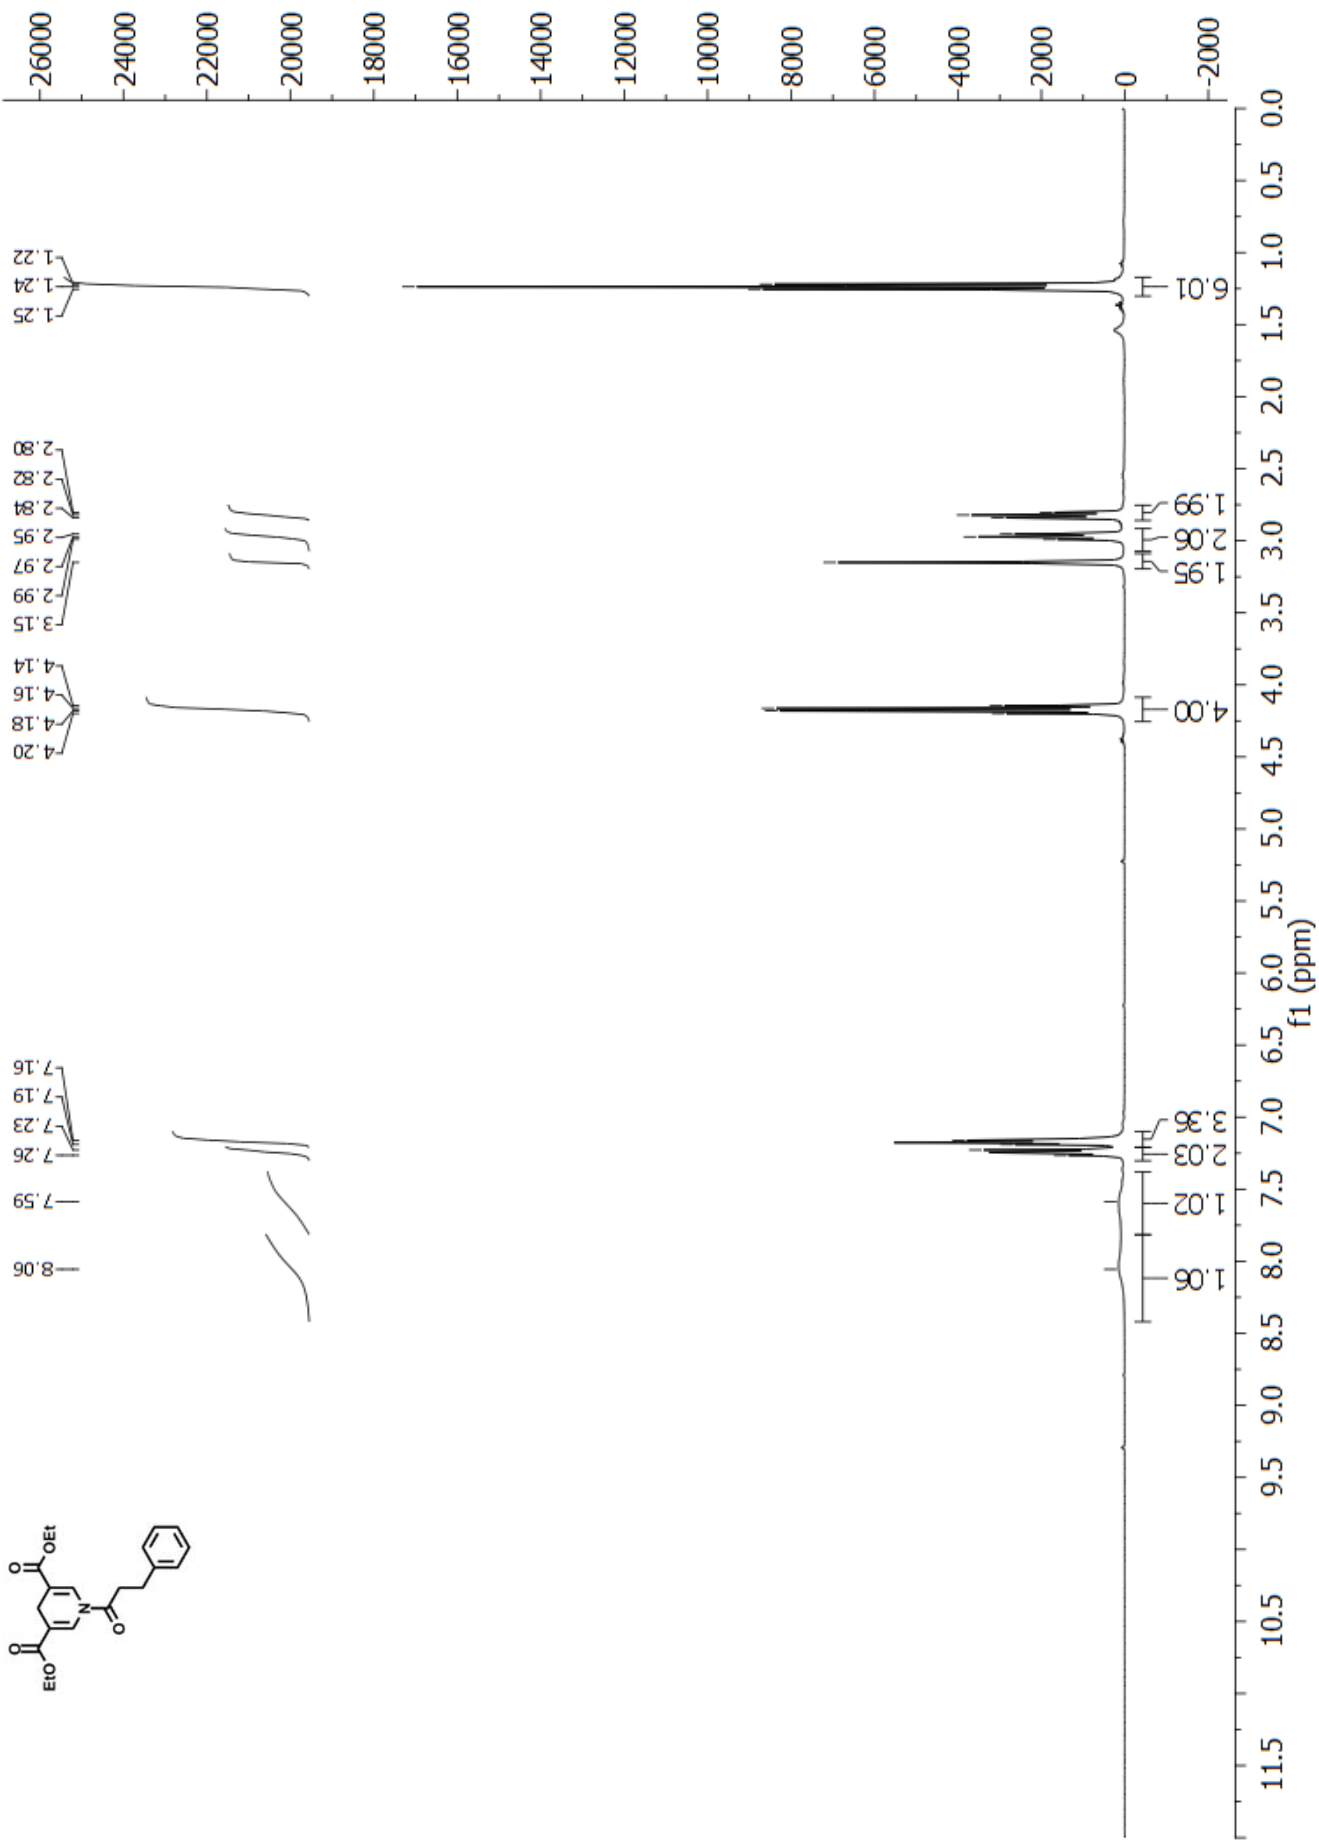

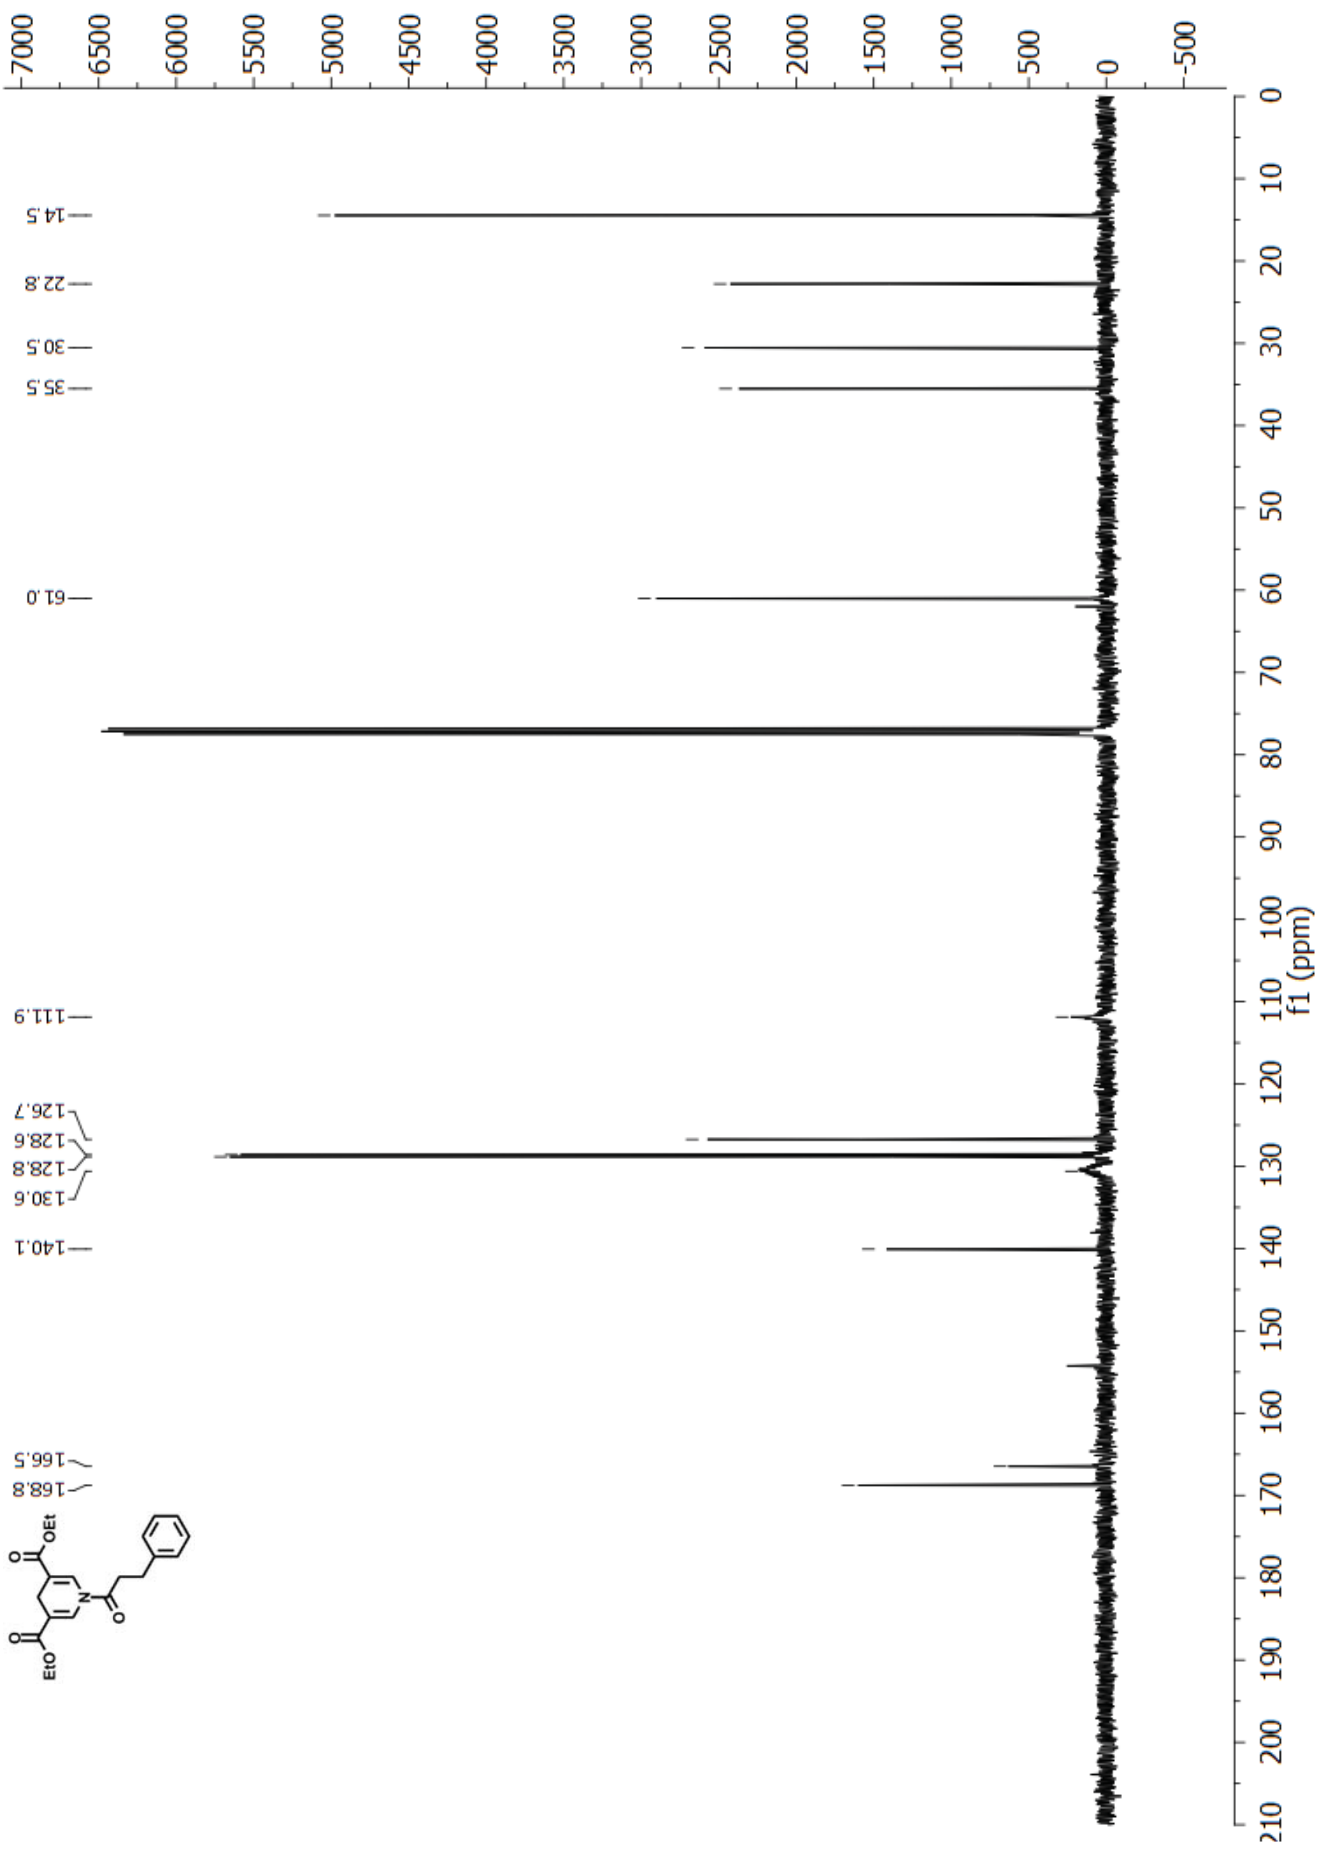

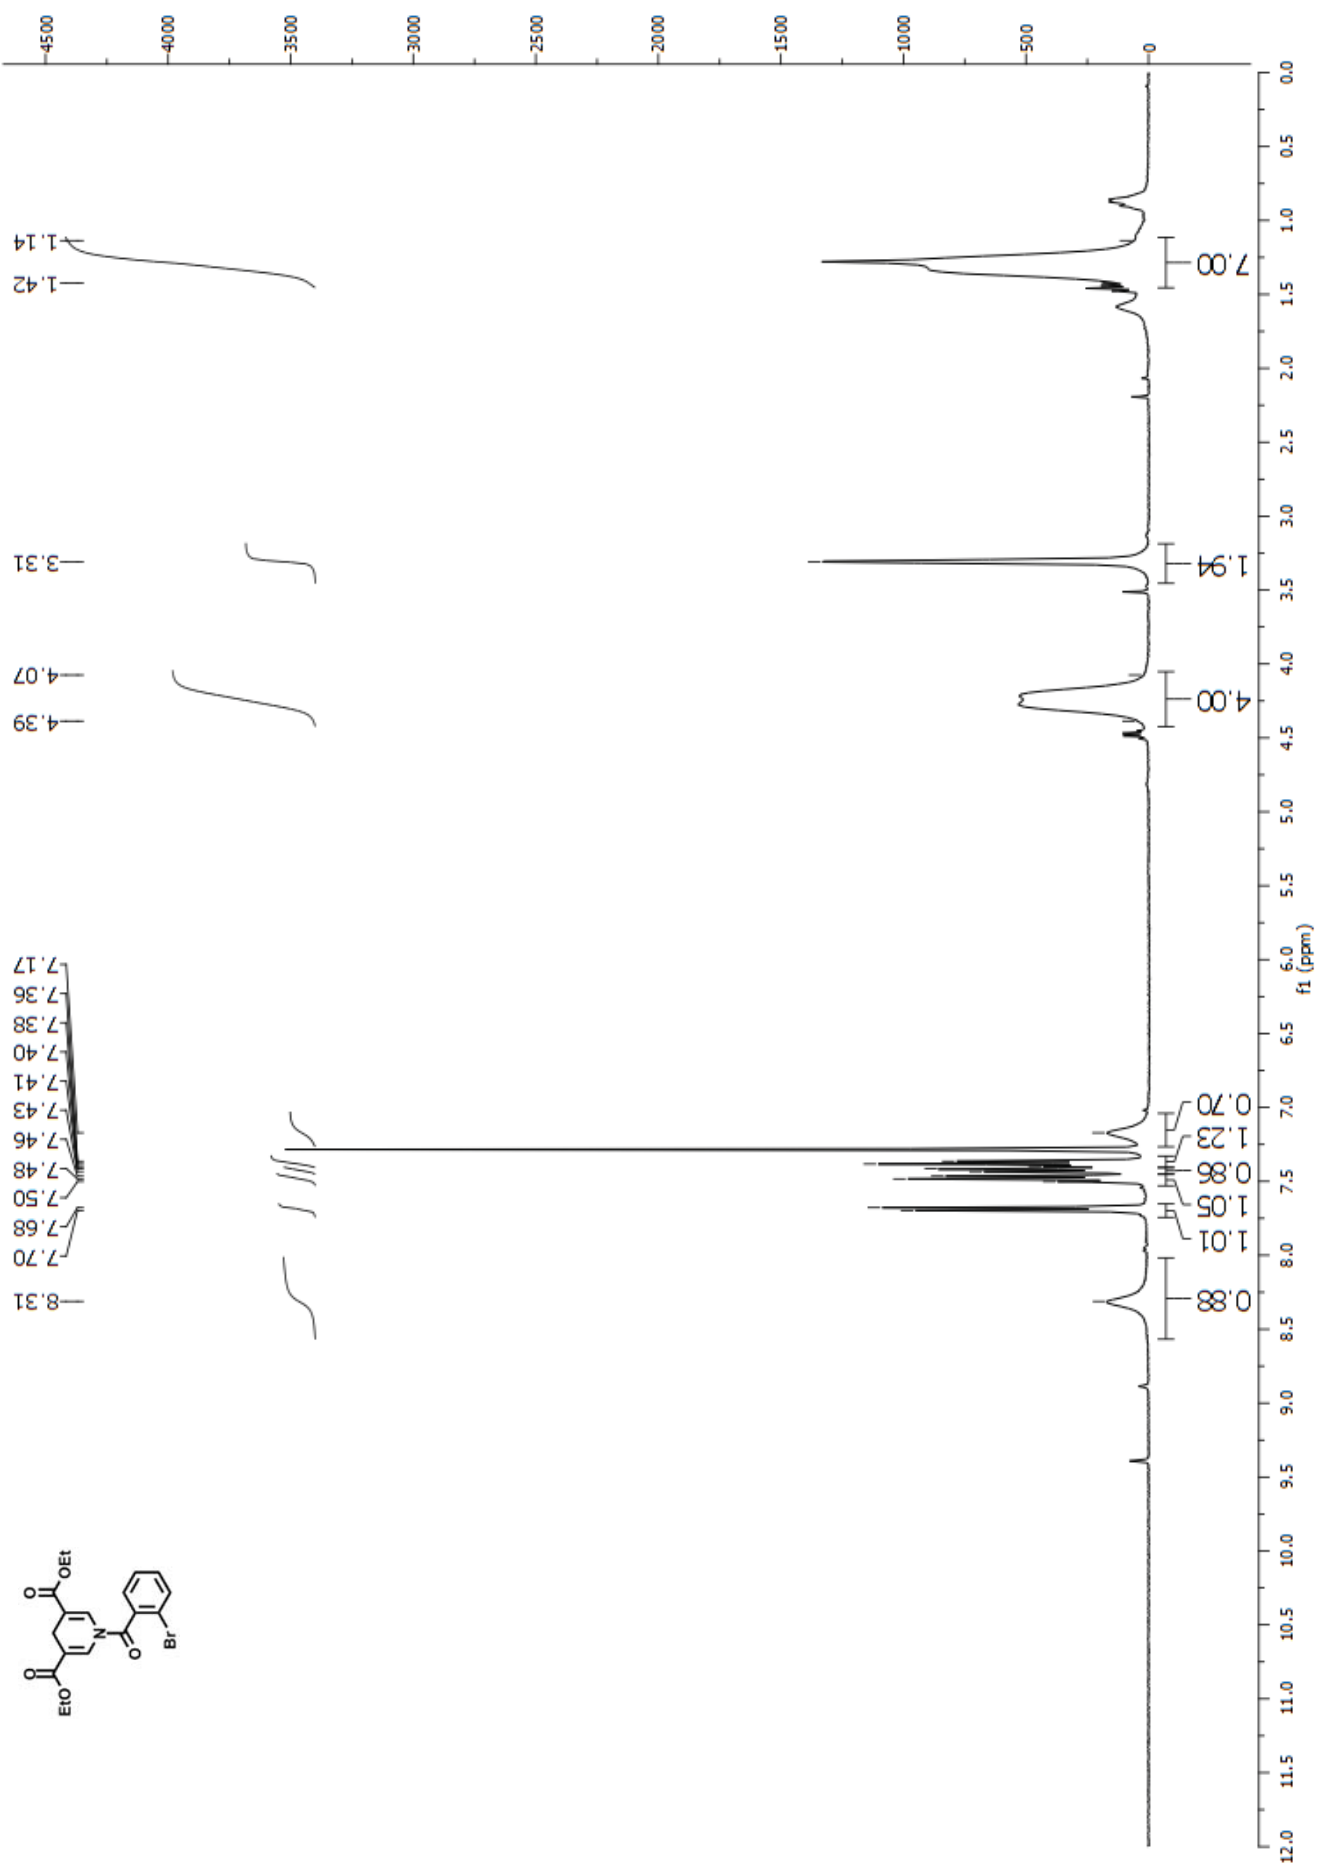

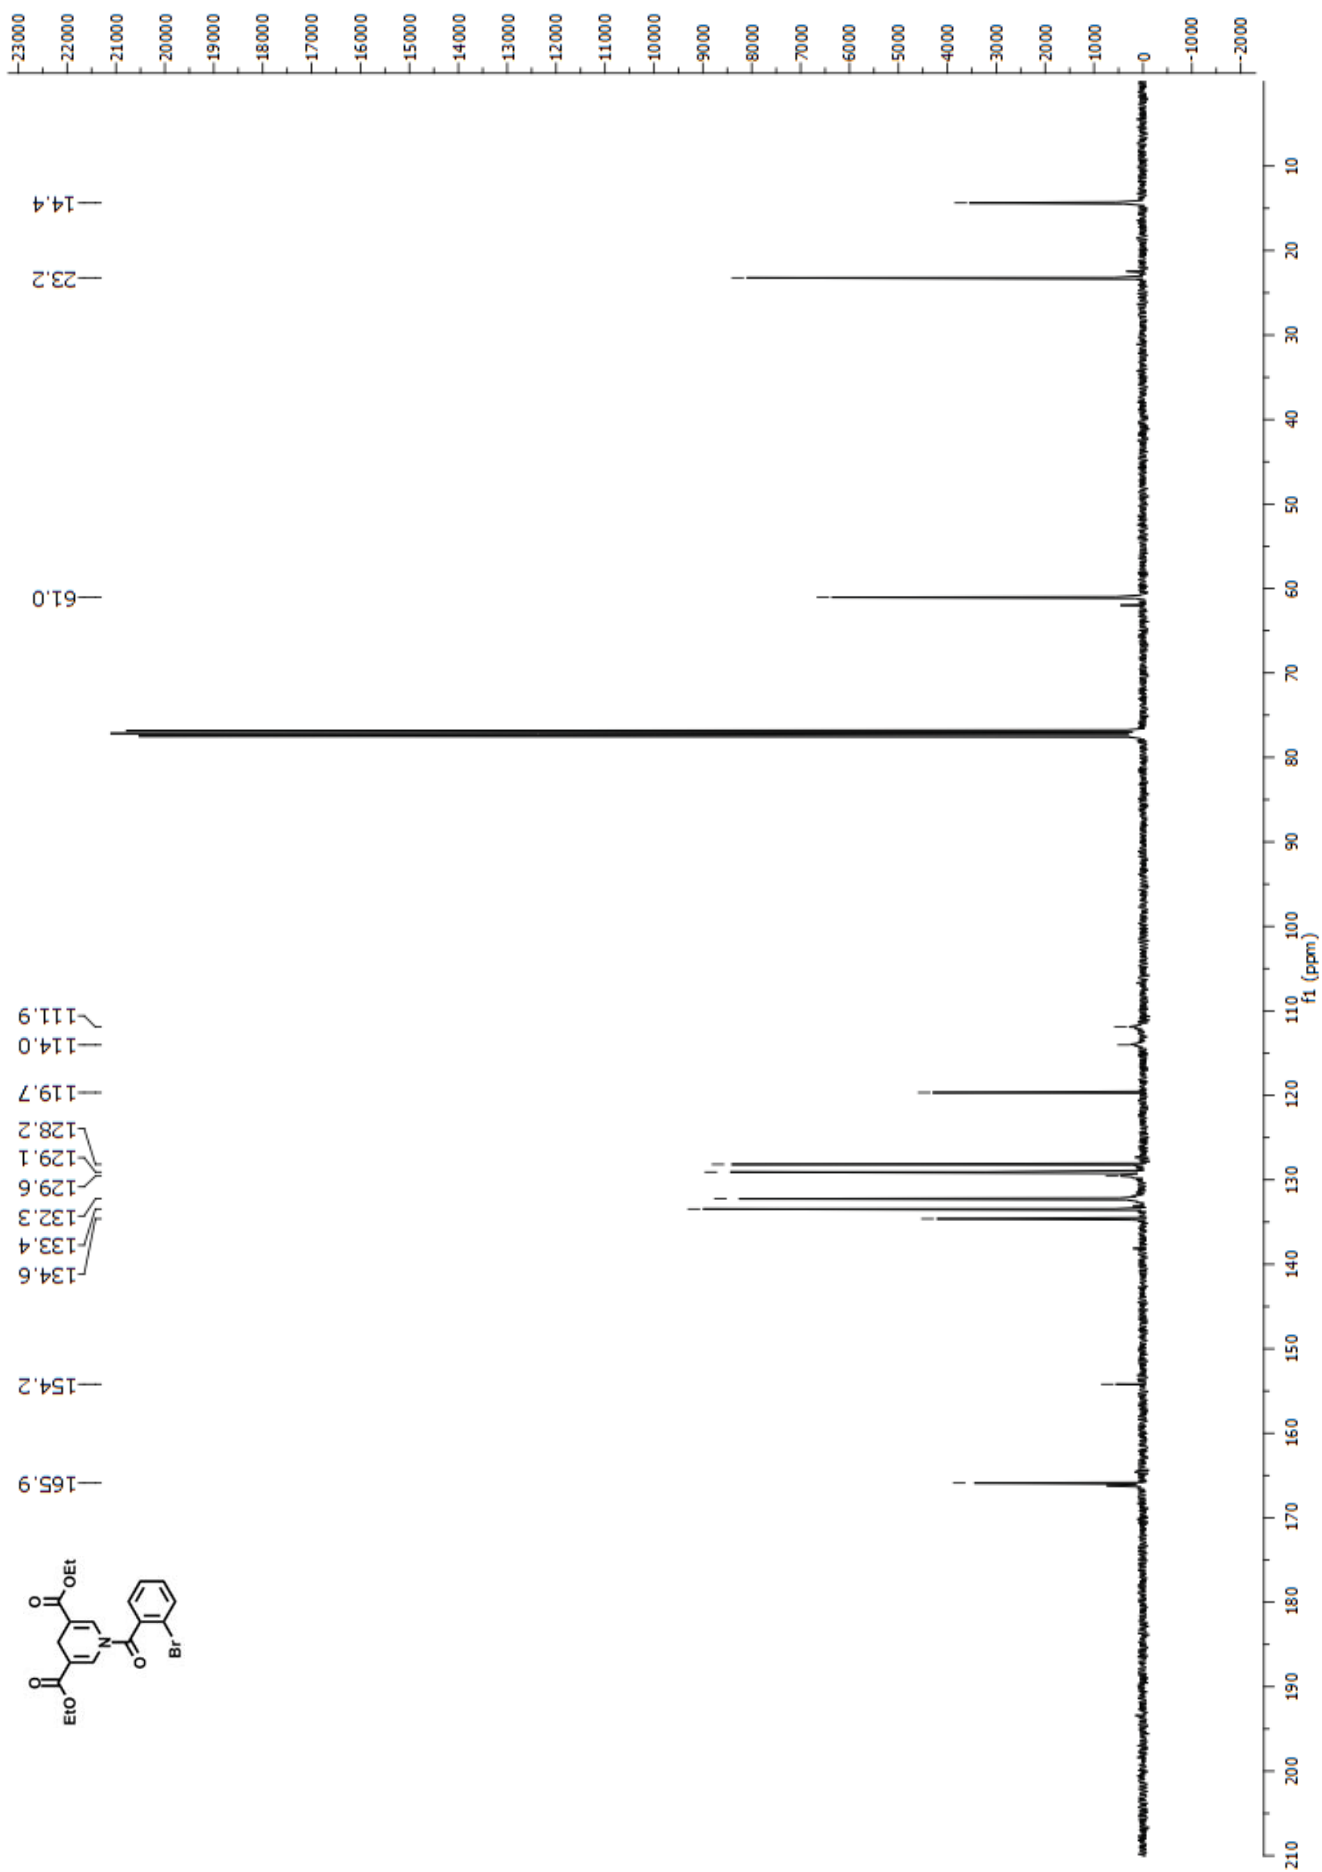

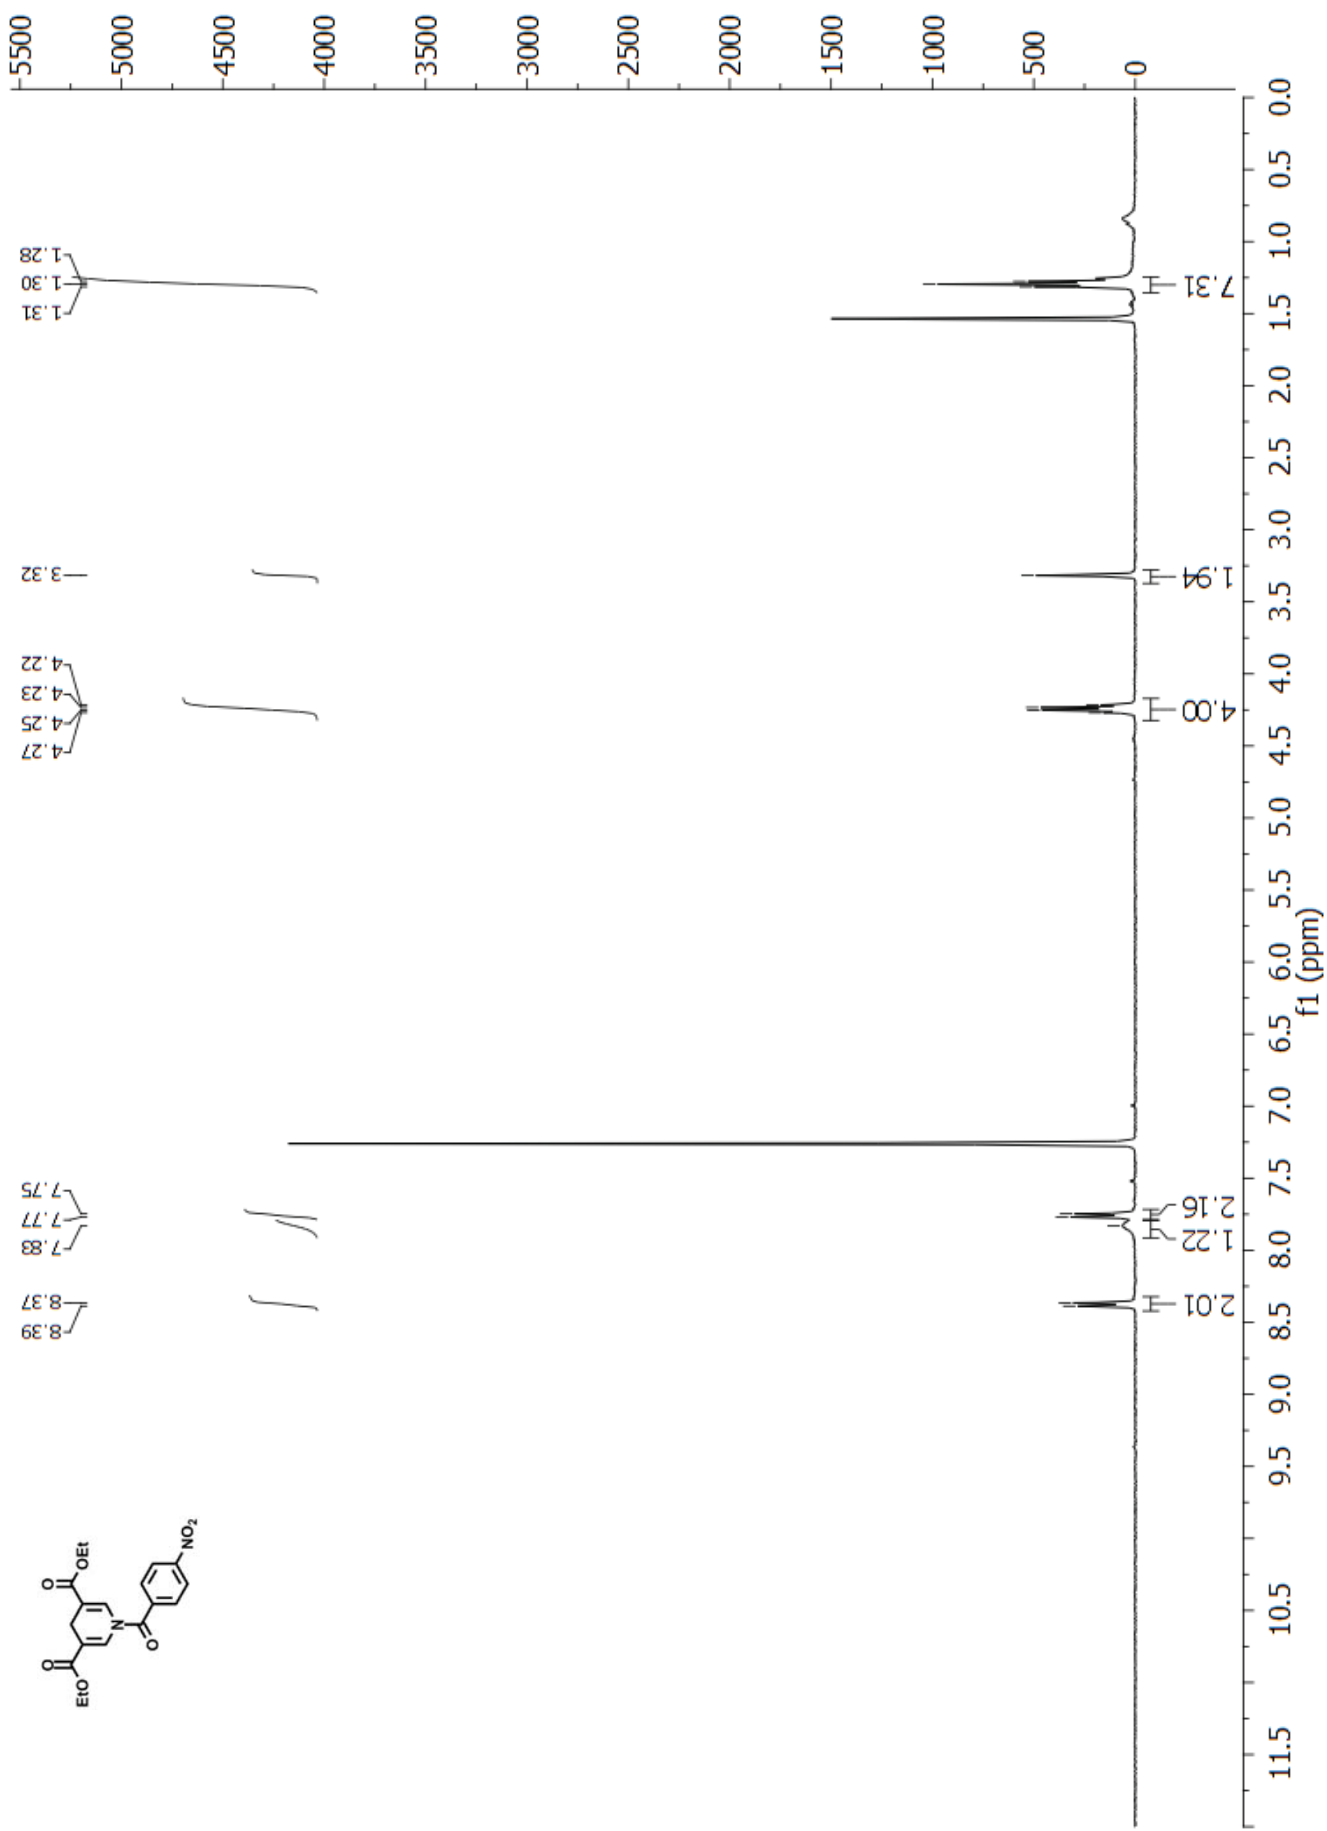

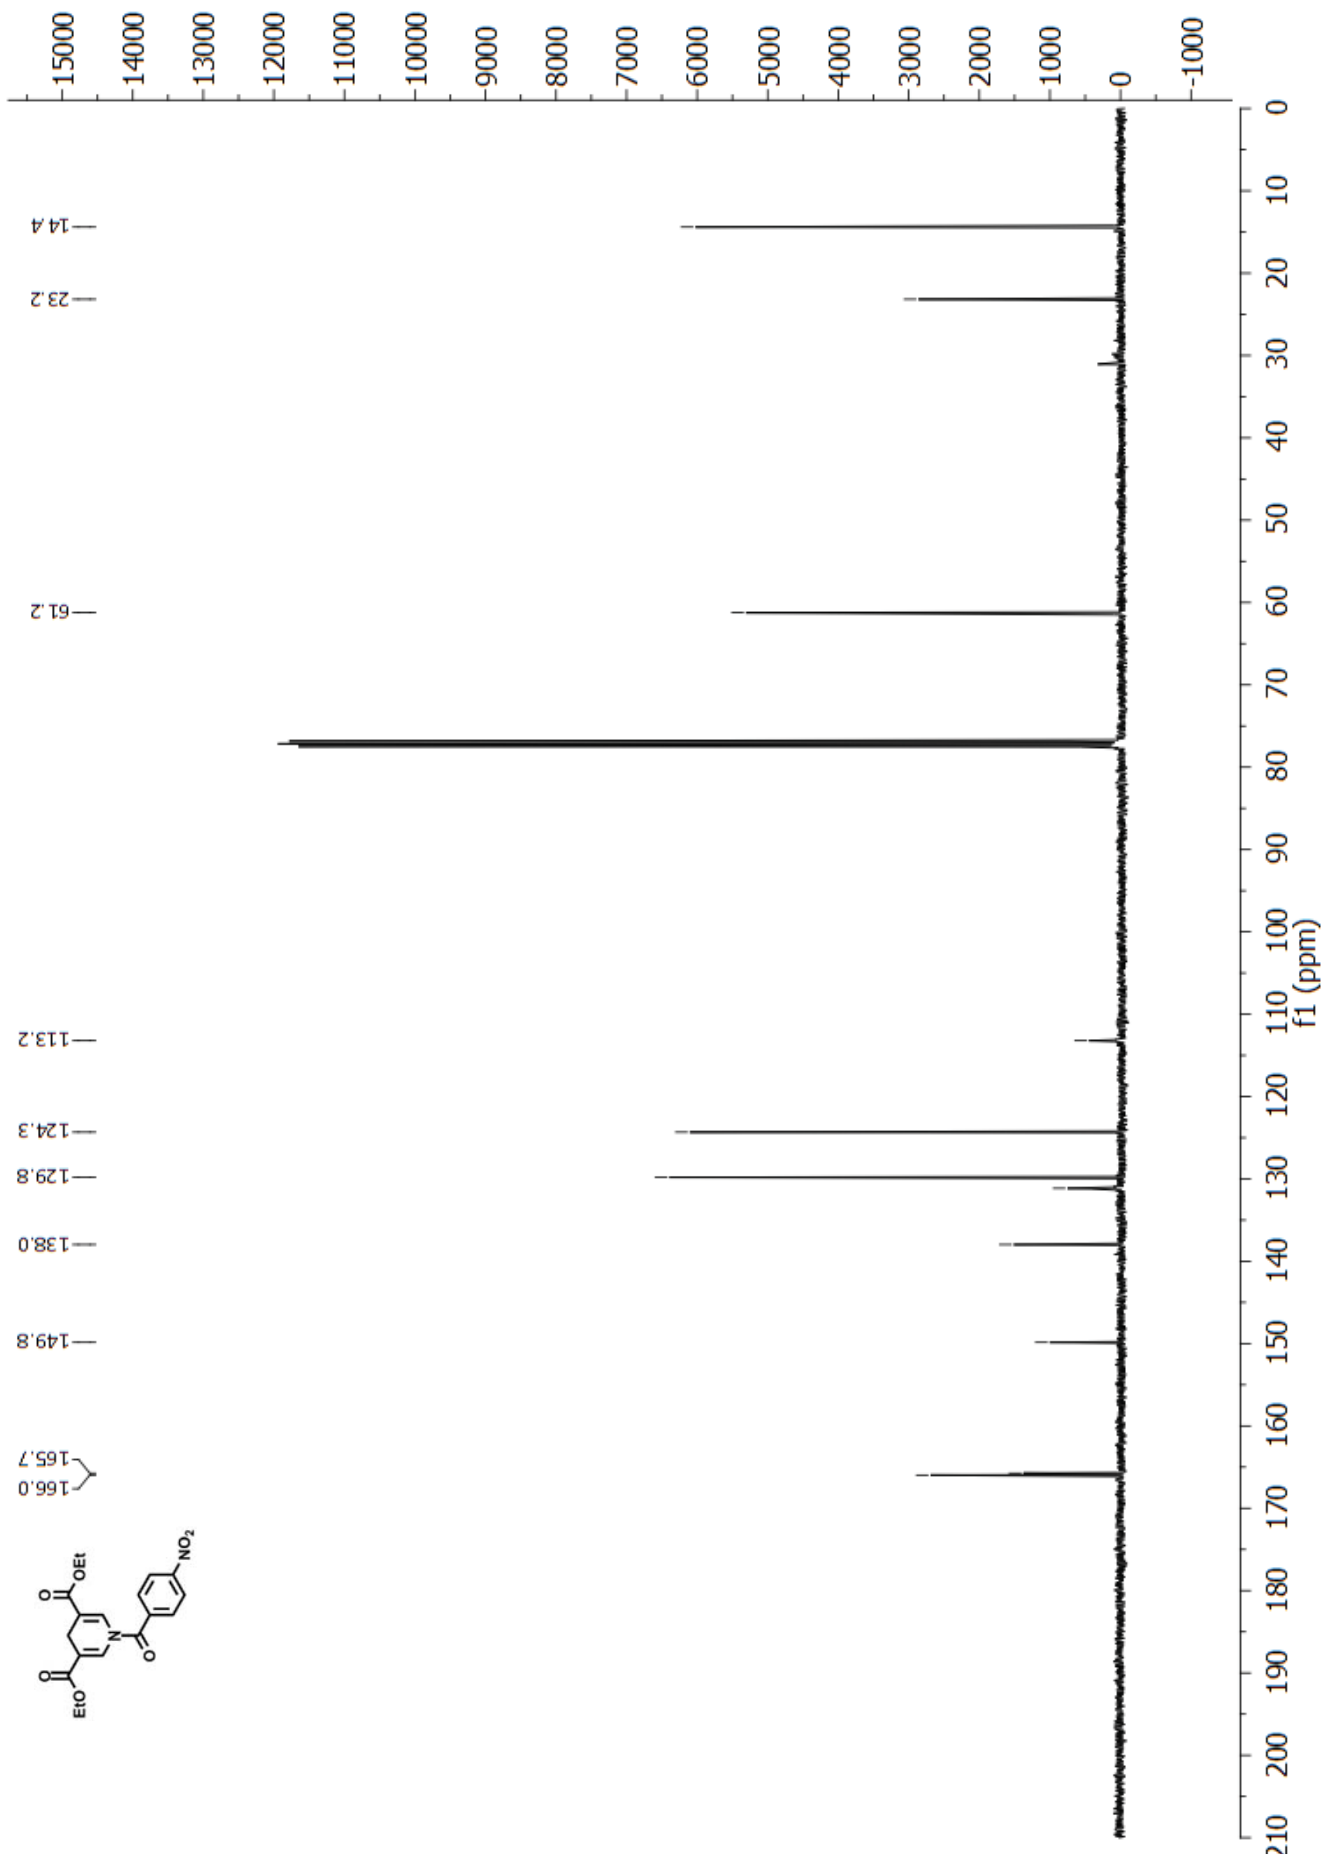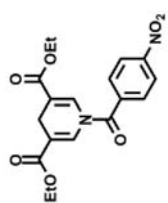

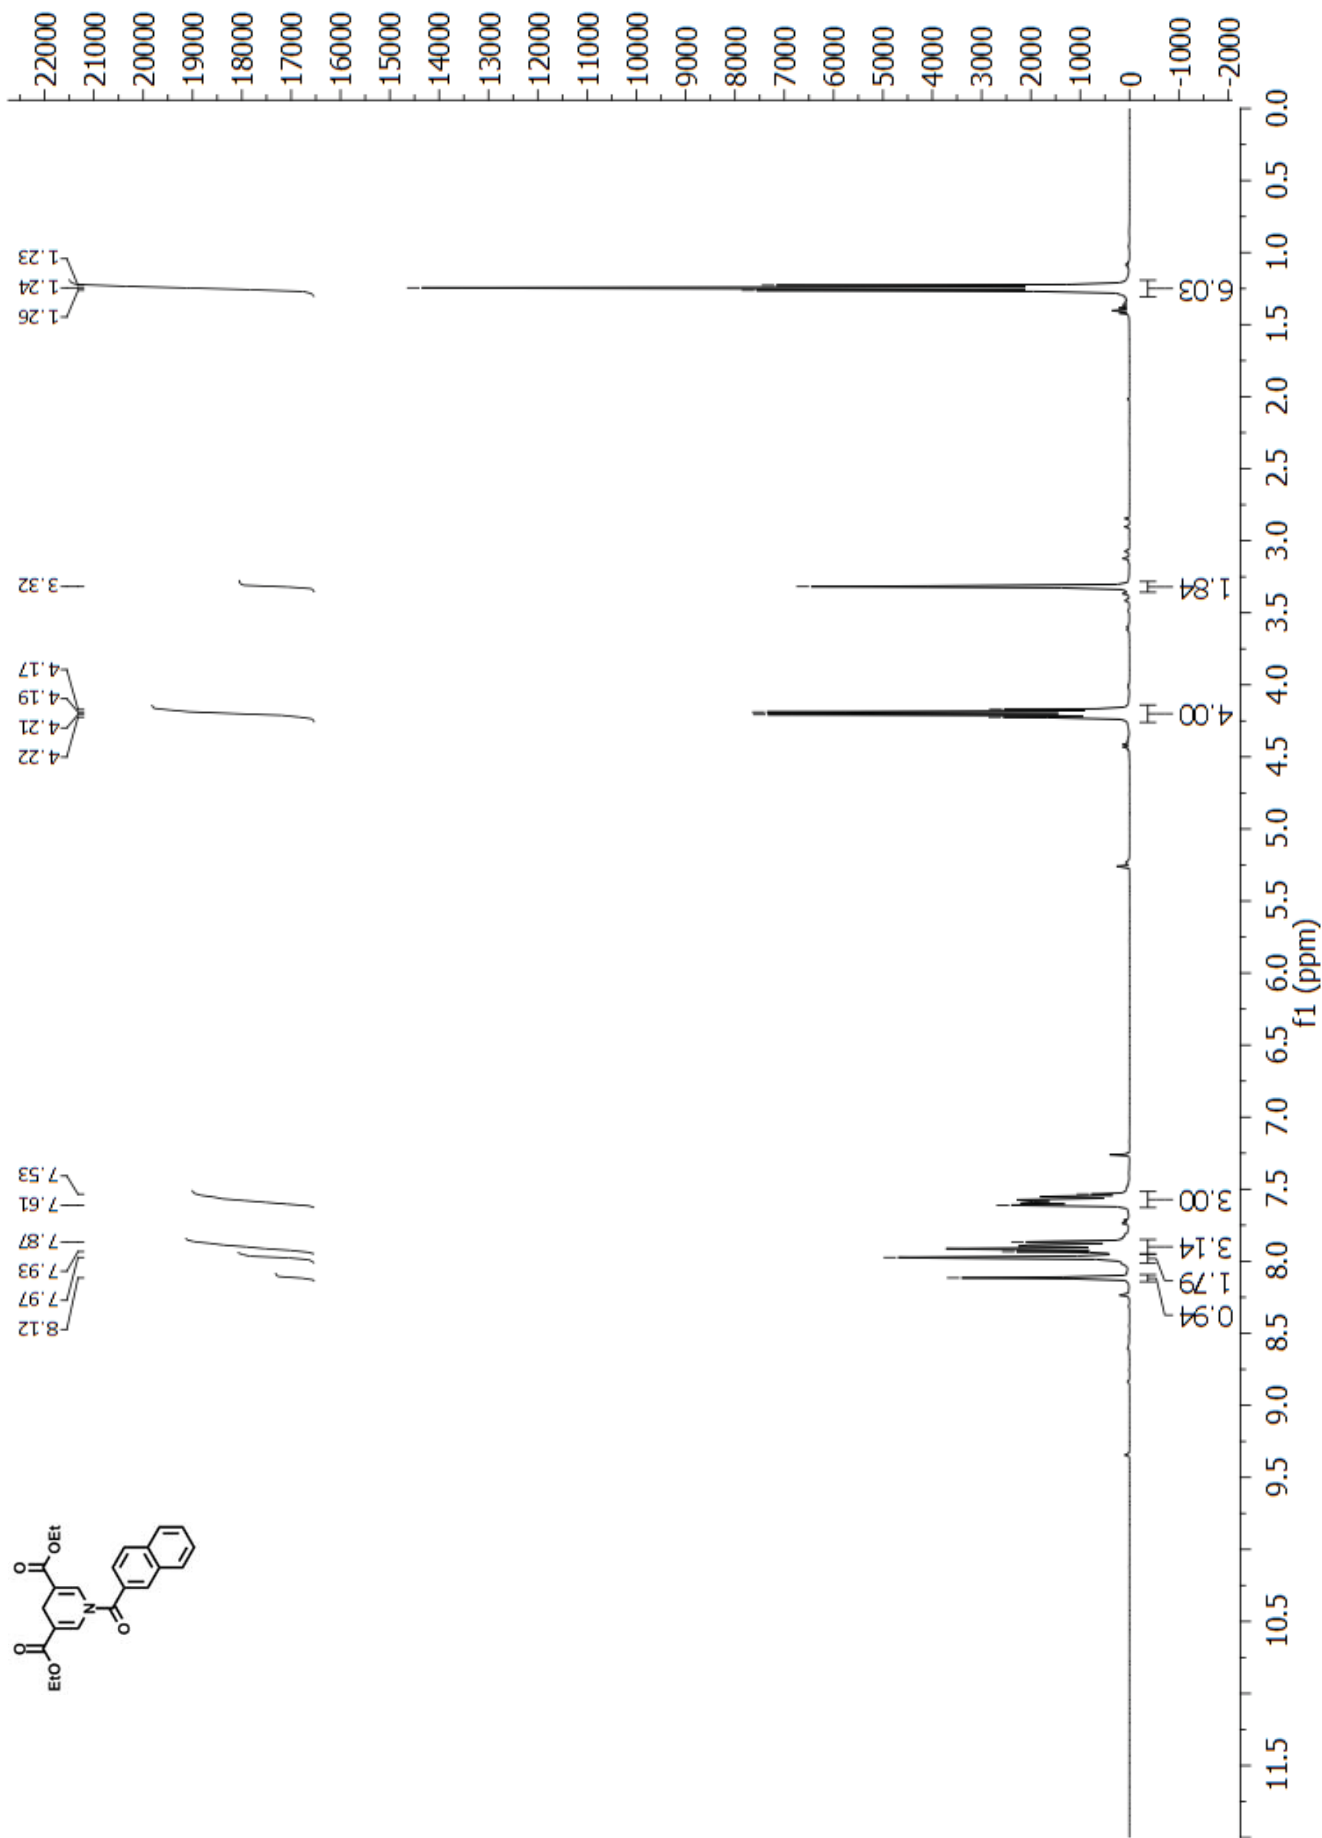

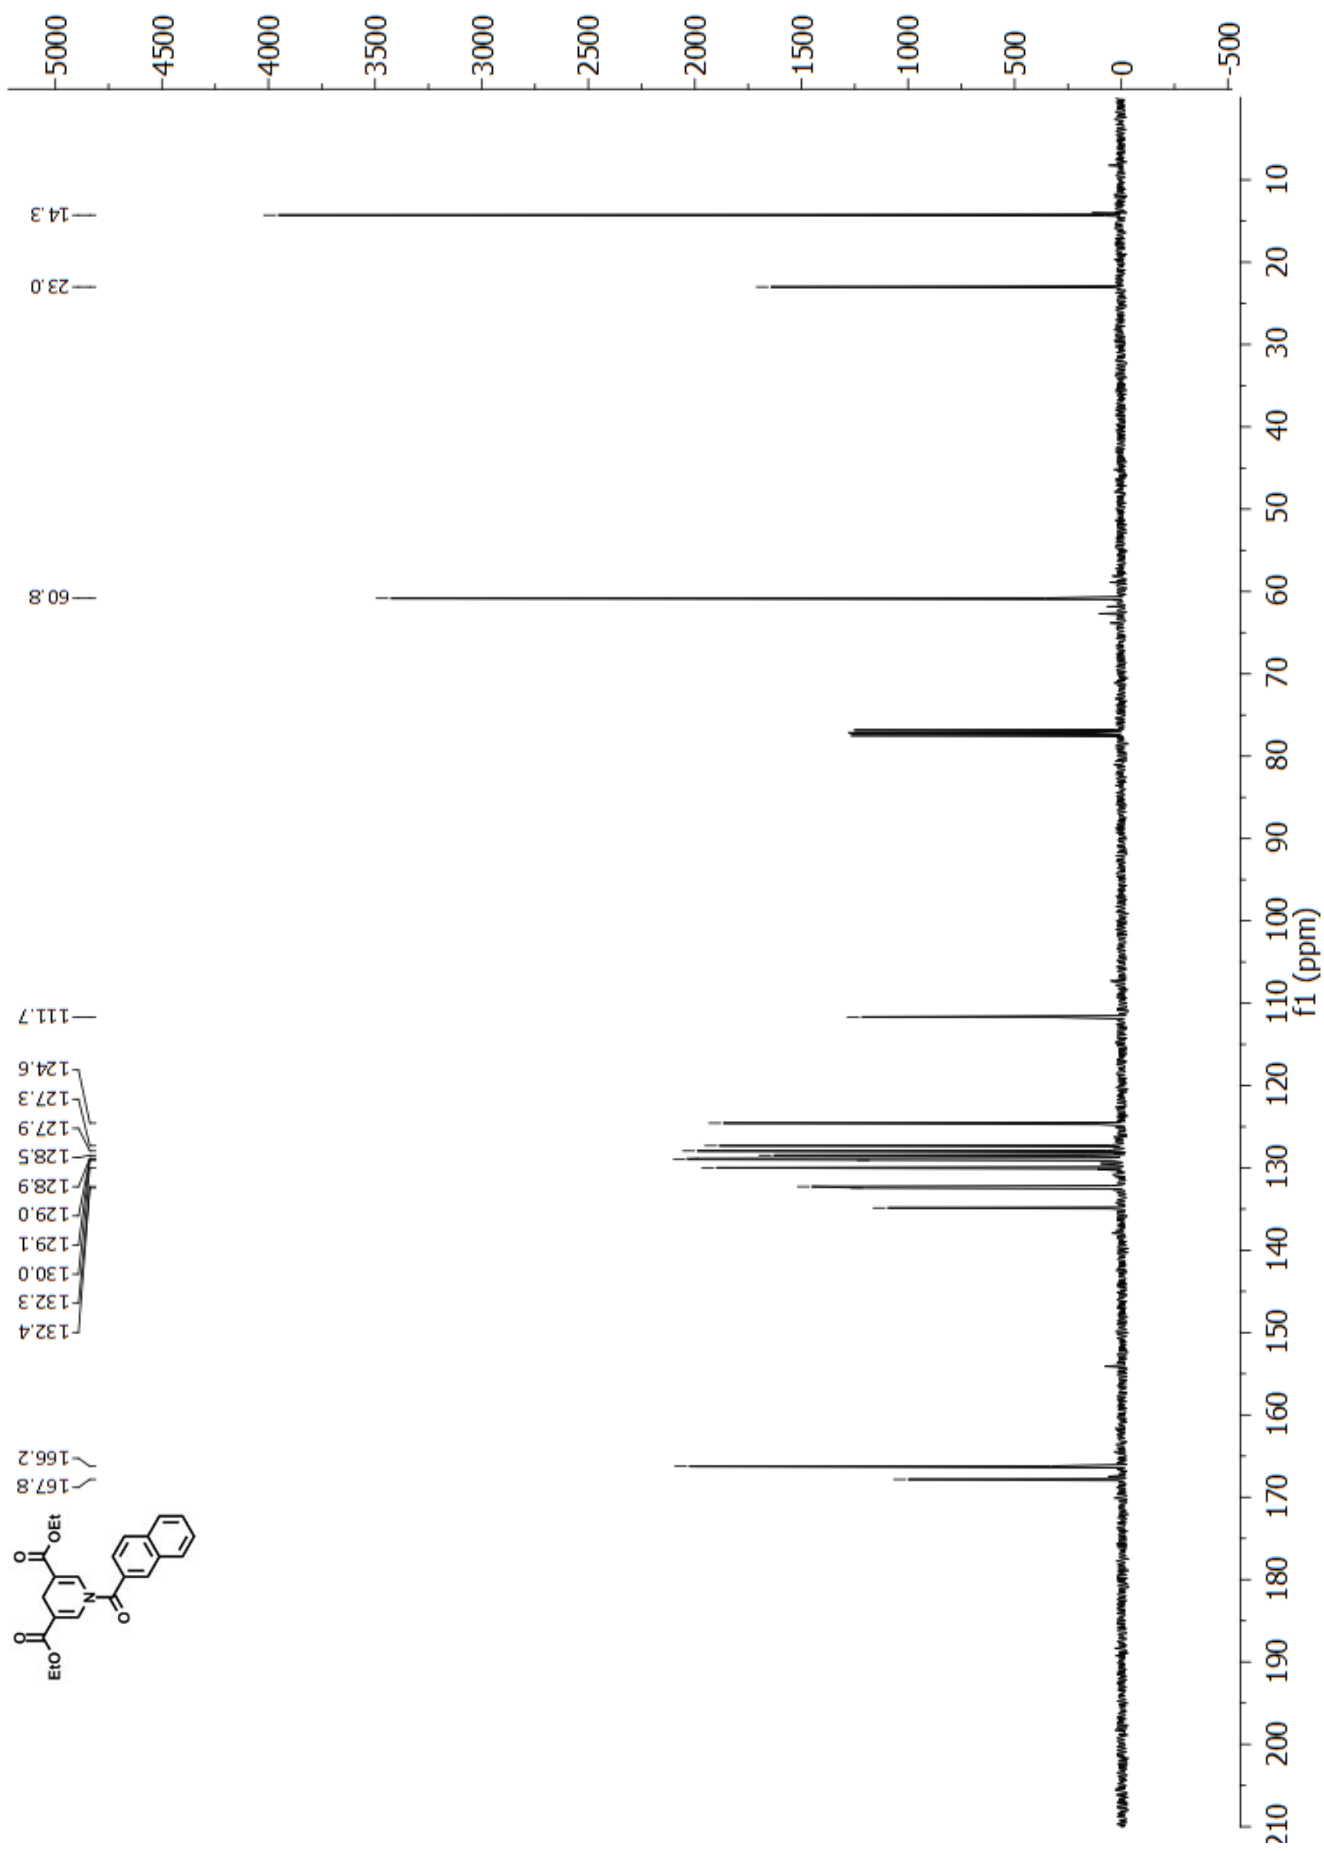

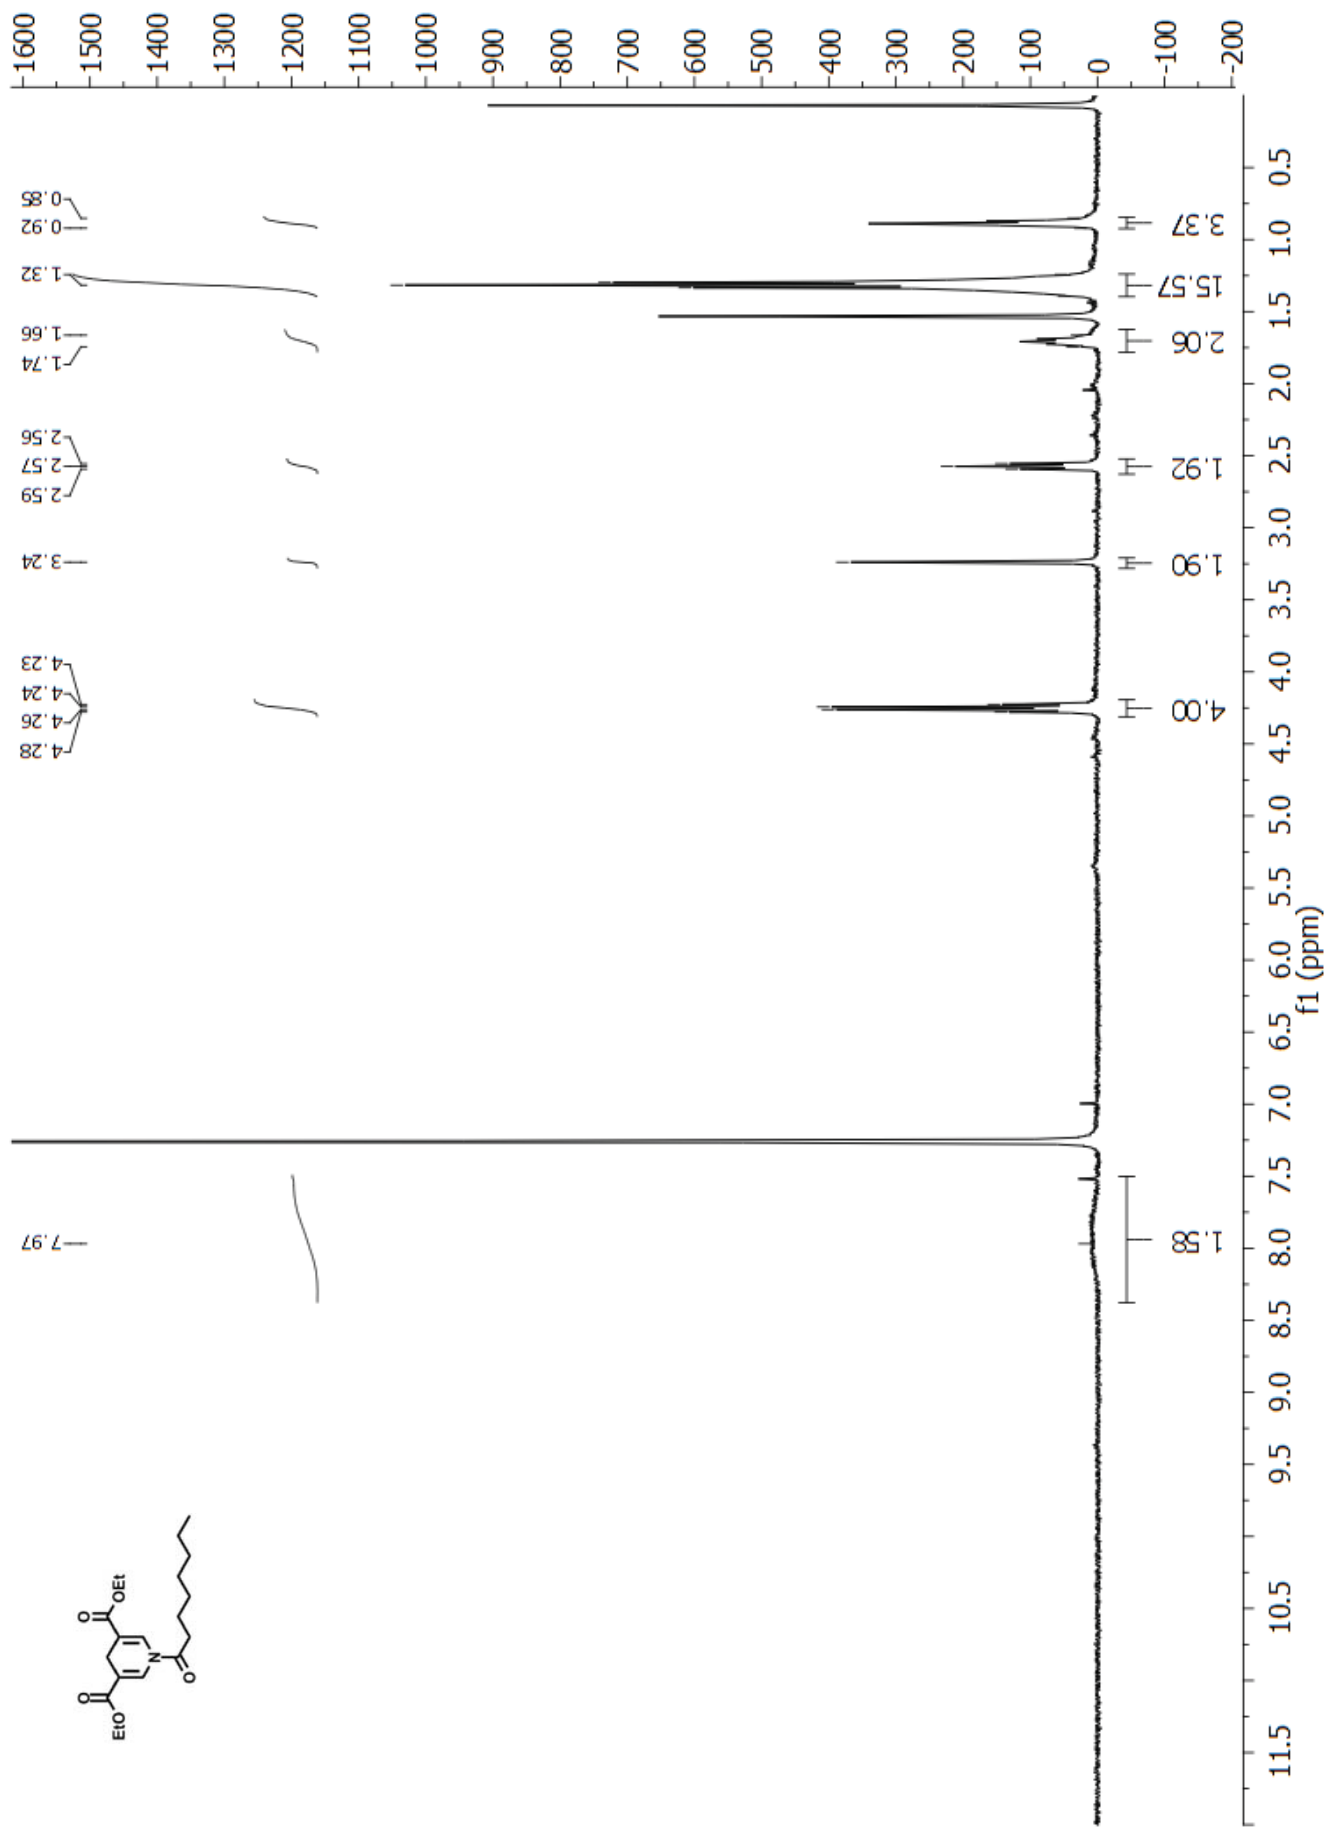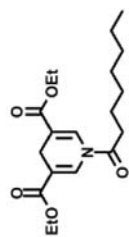

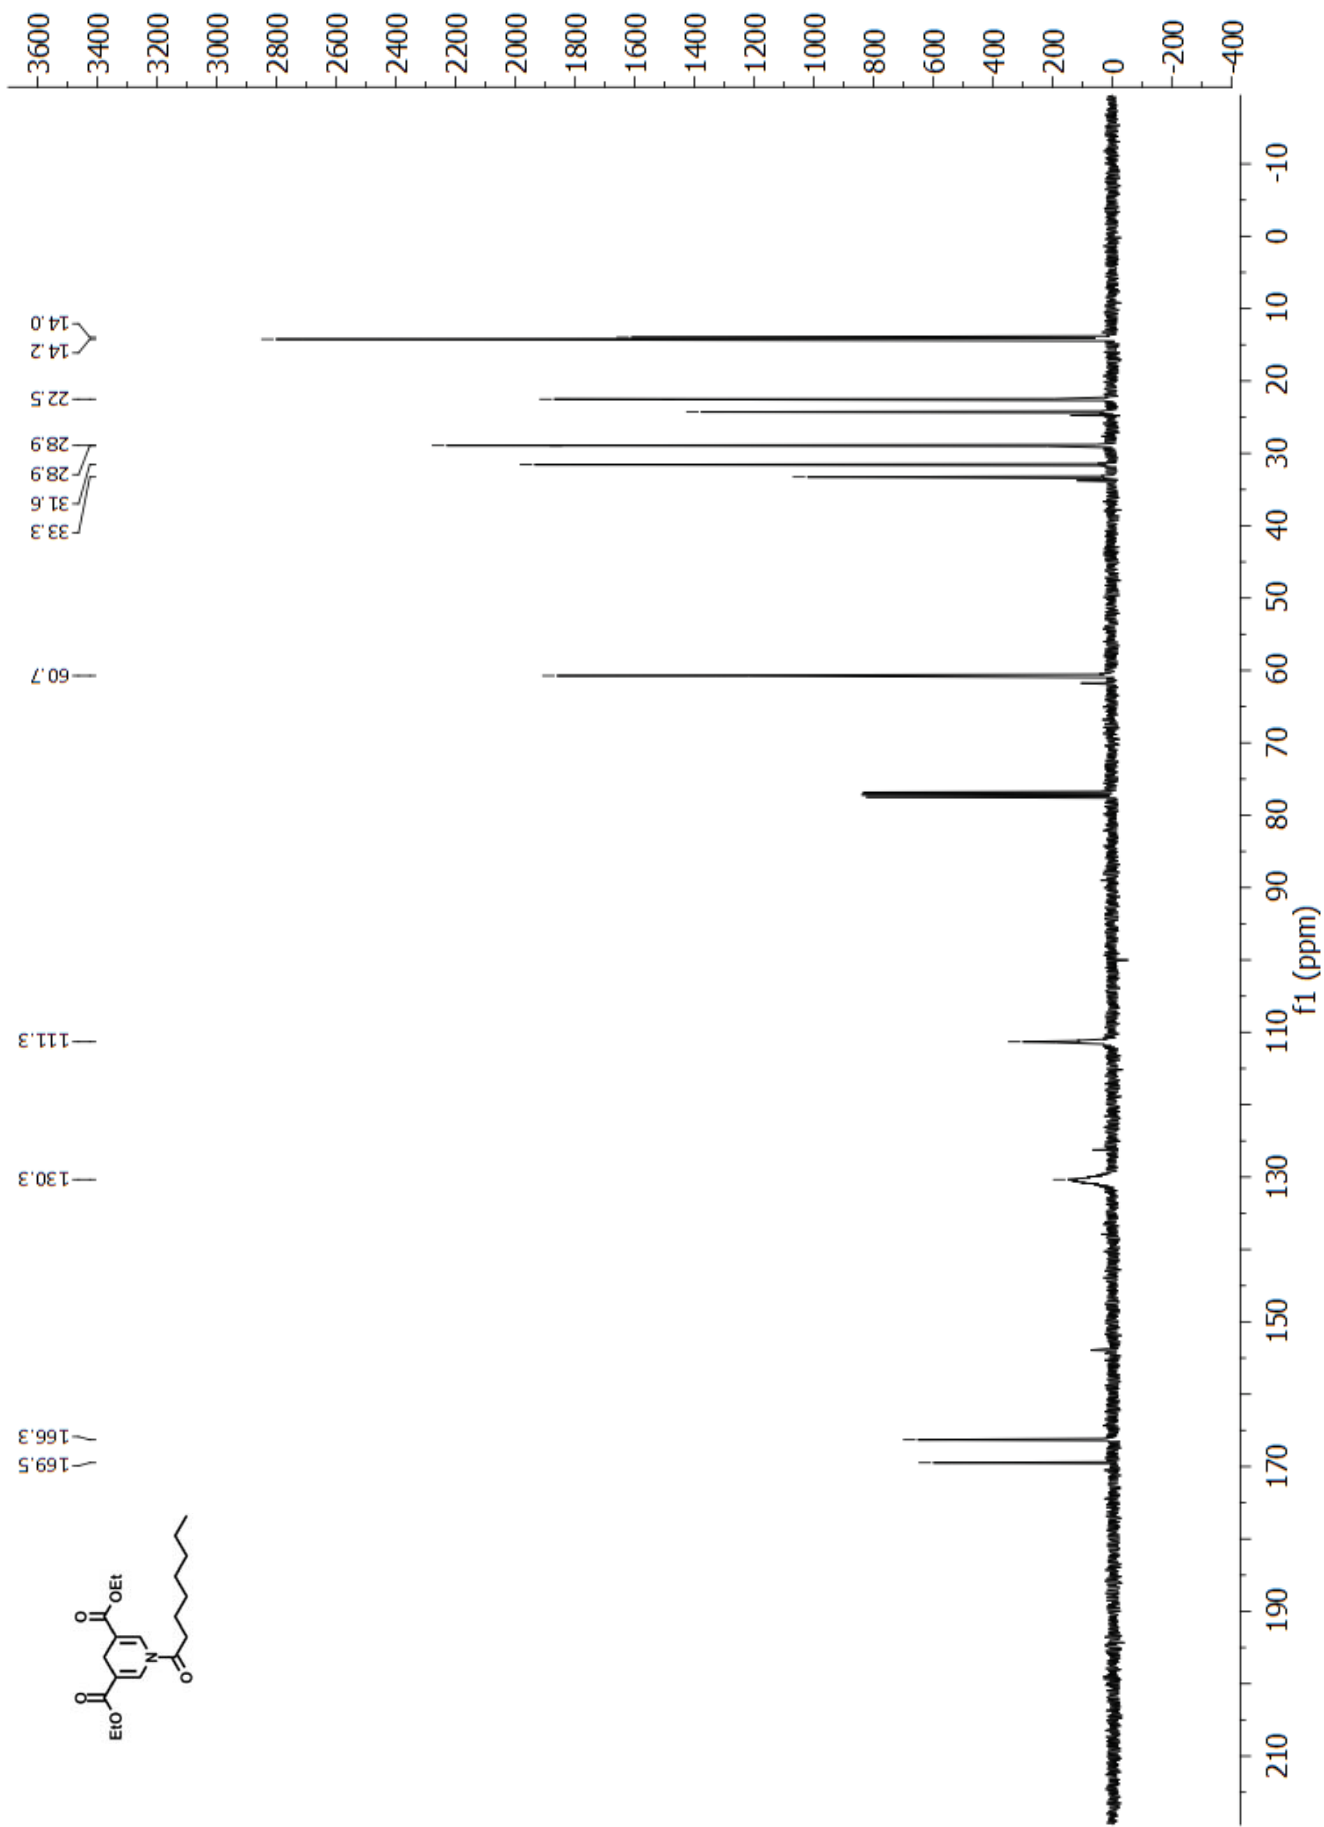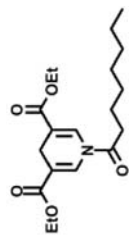

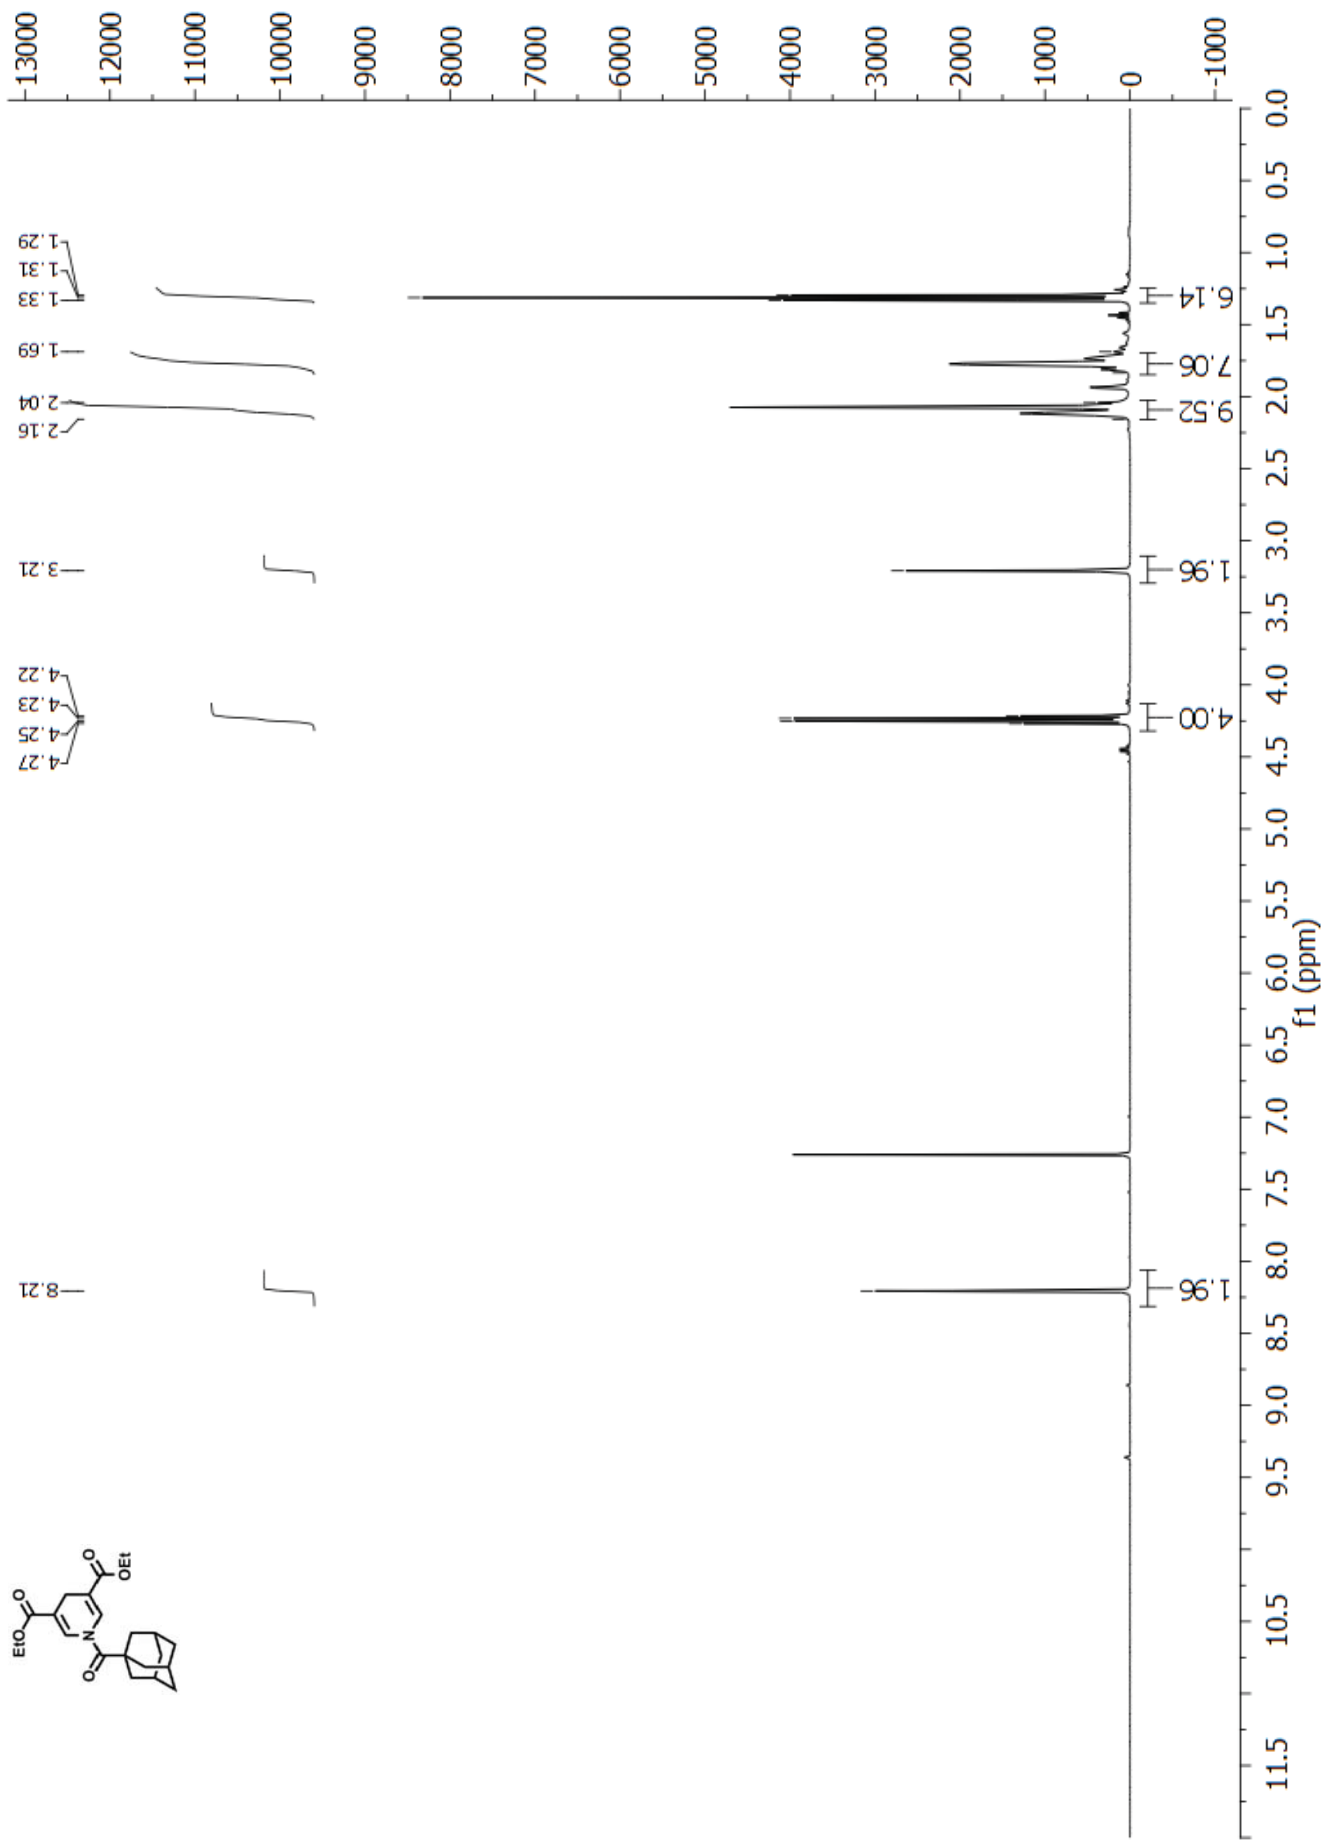

1.29  
1.31  
1.33

1.69  
2.04  
2.16

3.21

4.22  
4.23  
4.25  
4.27

8.21

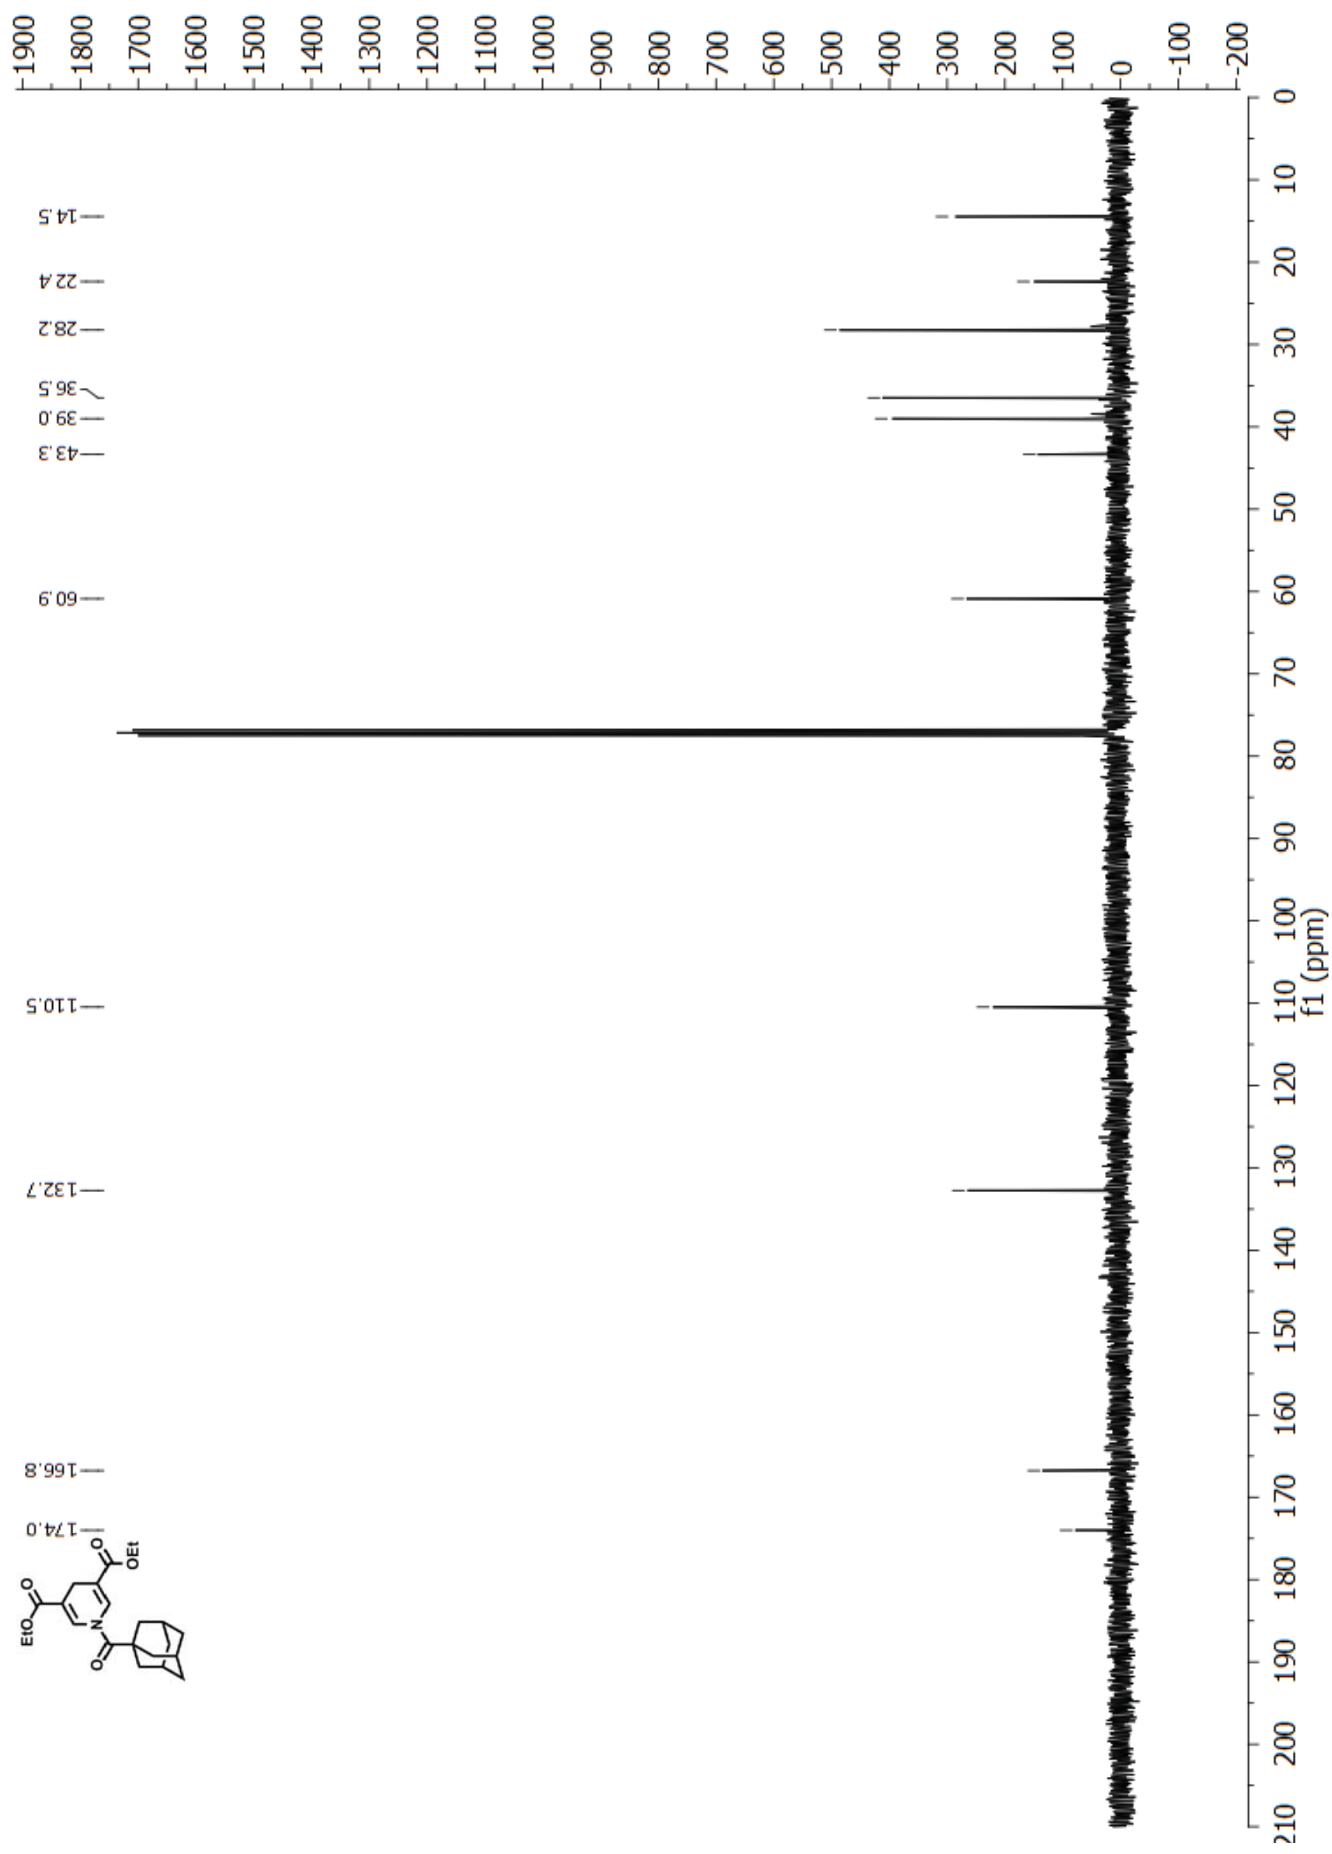

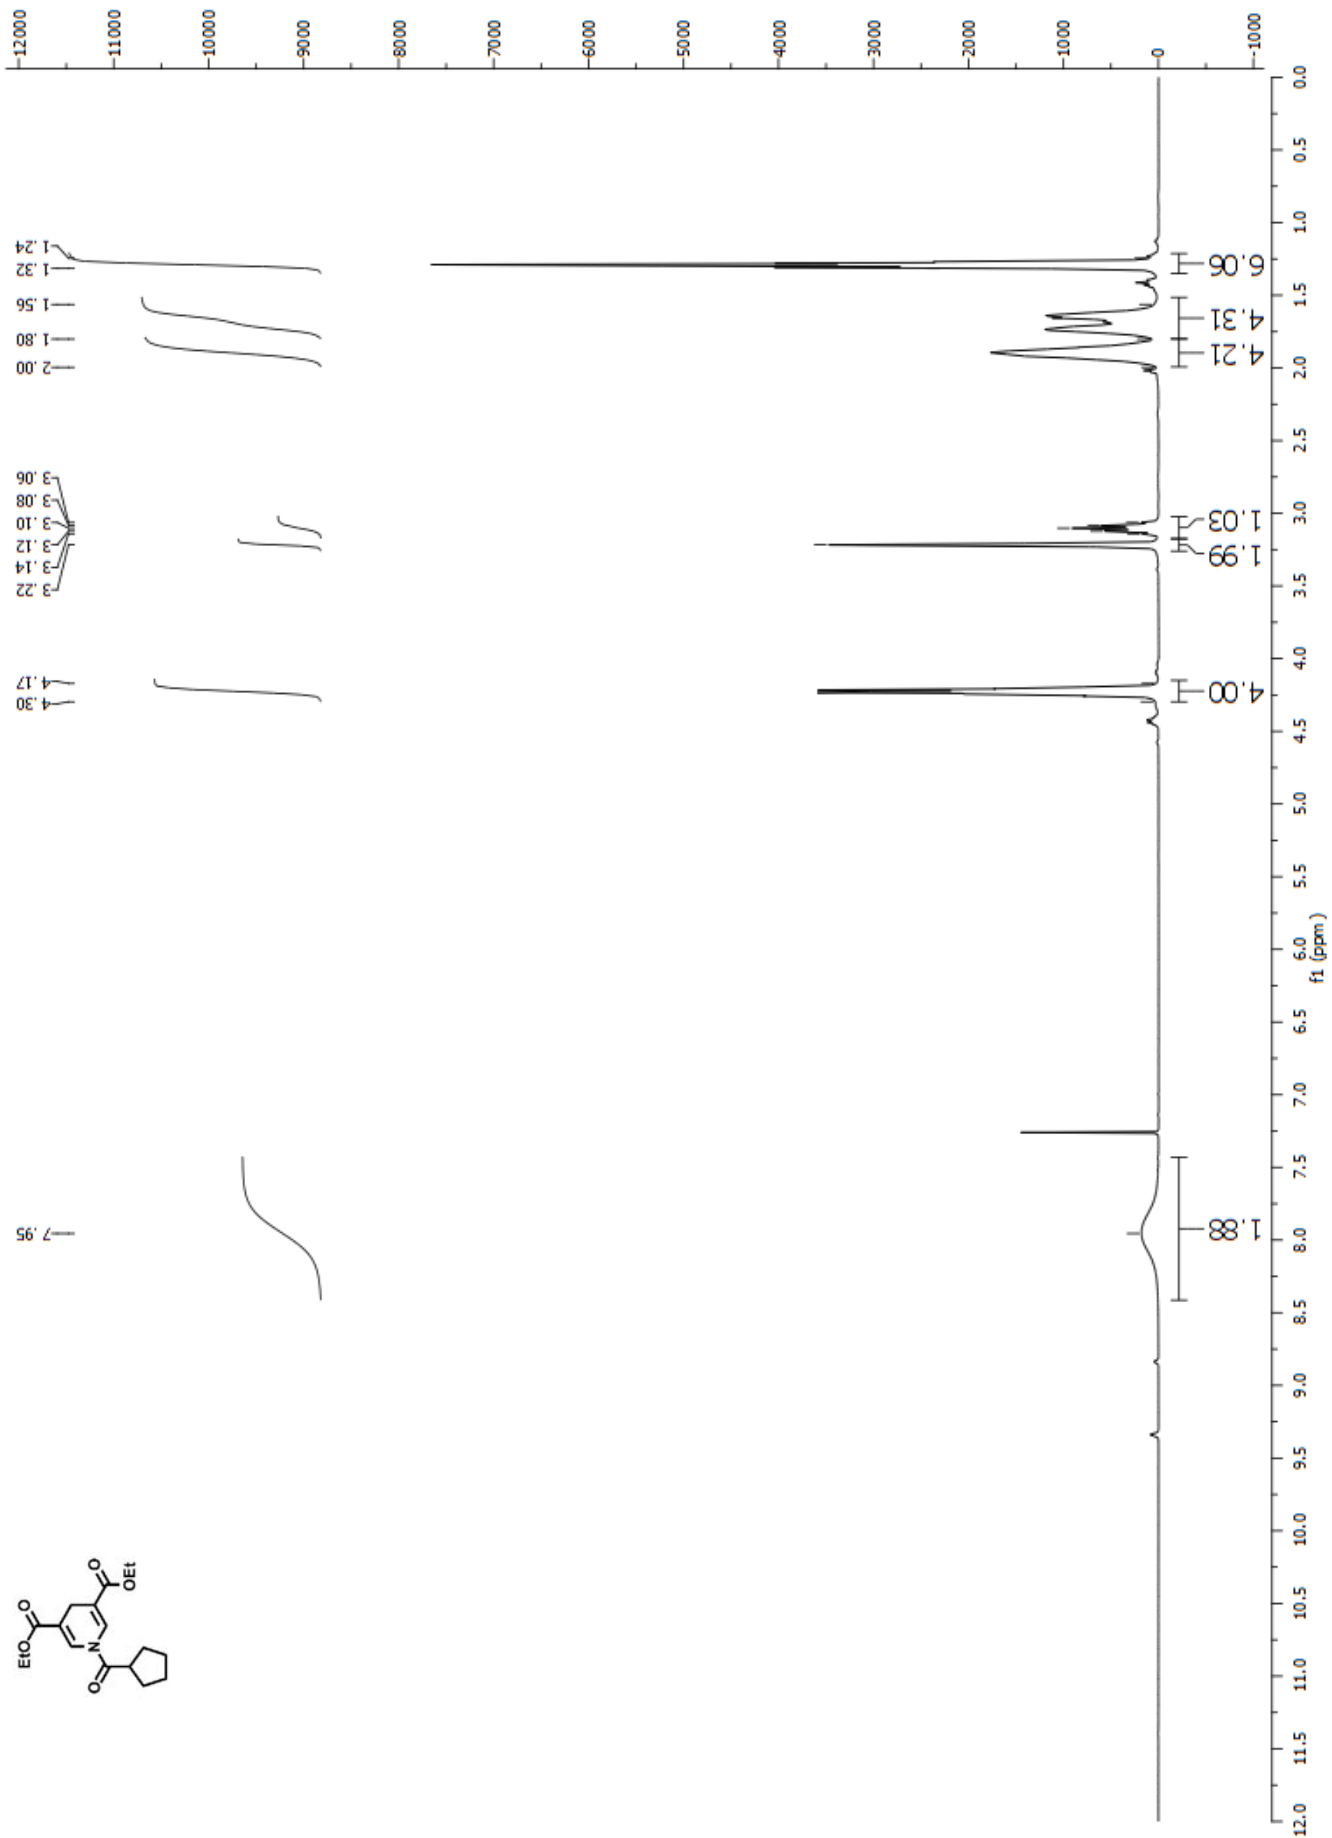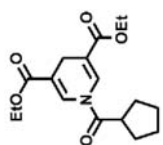

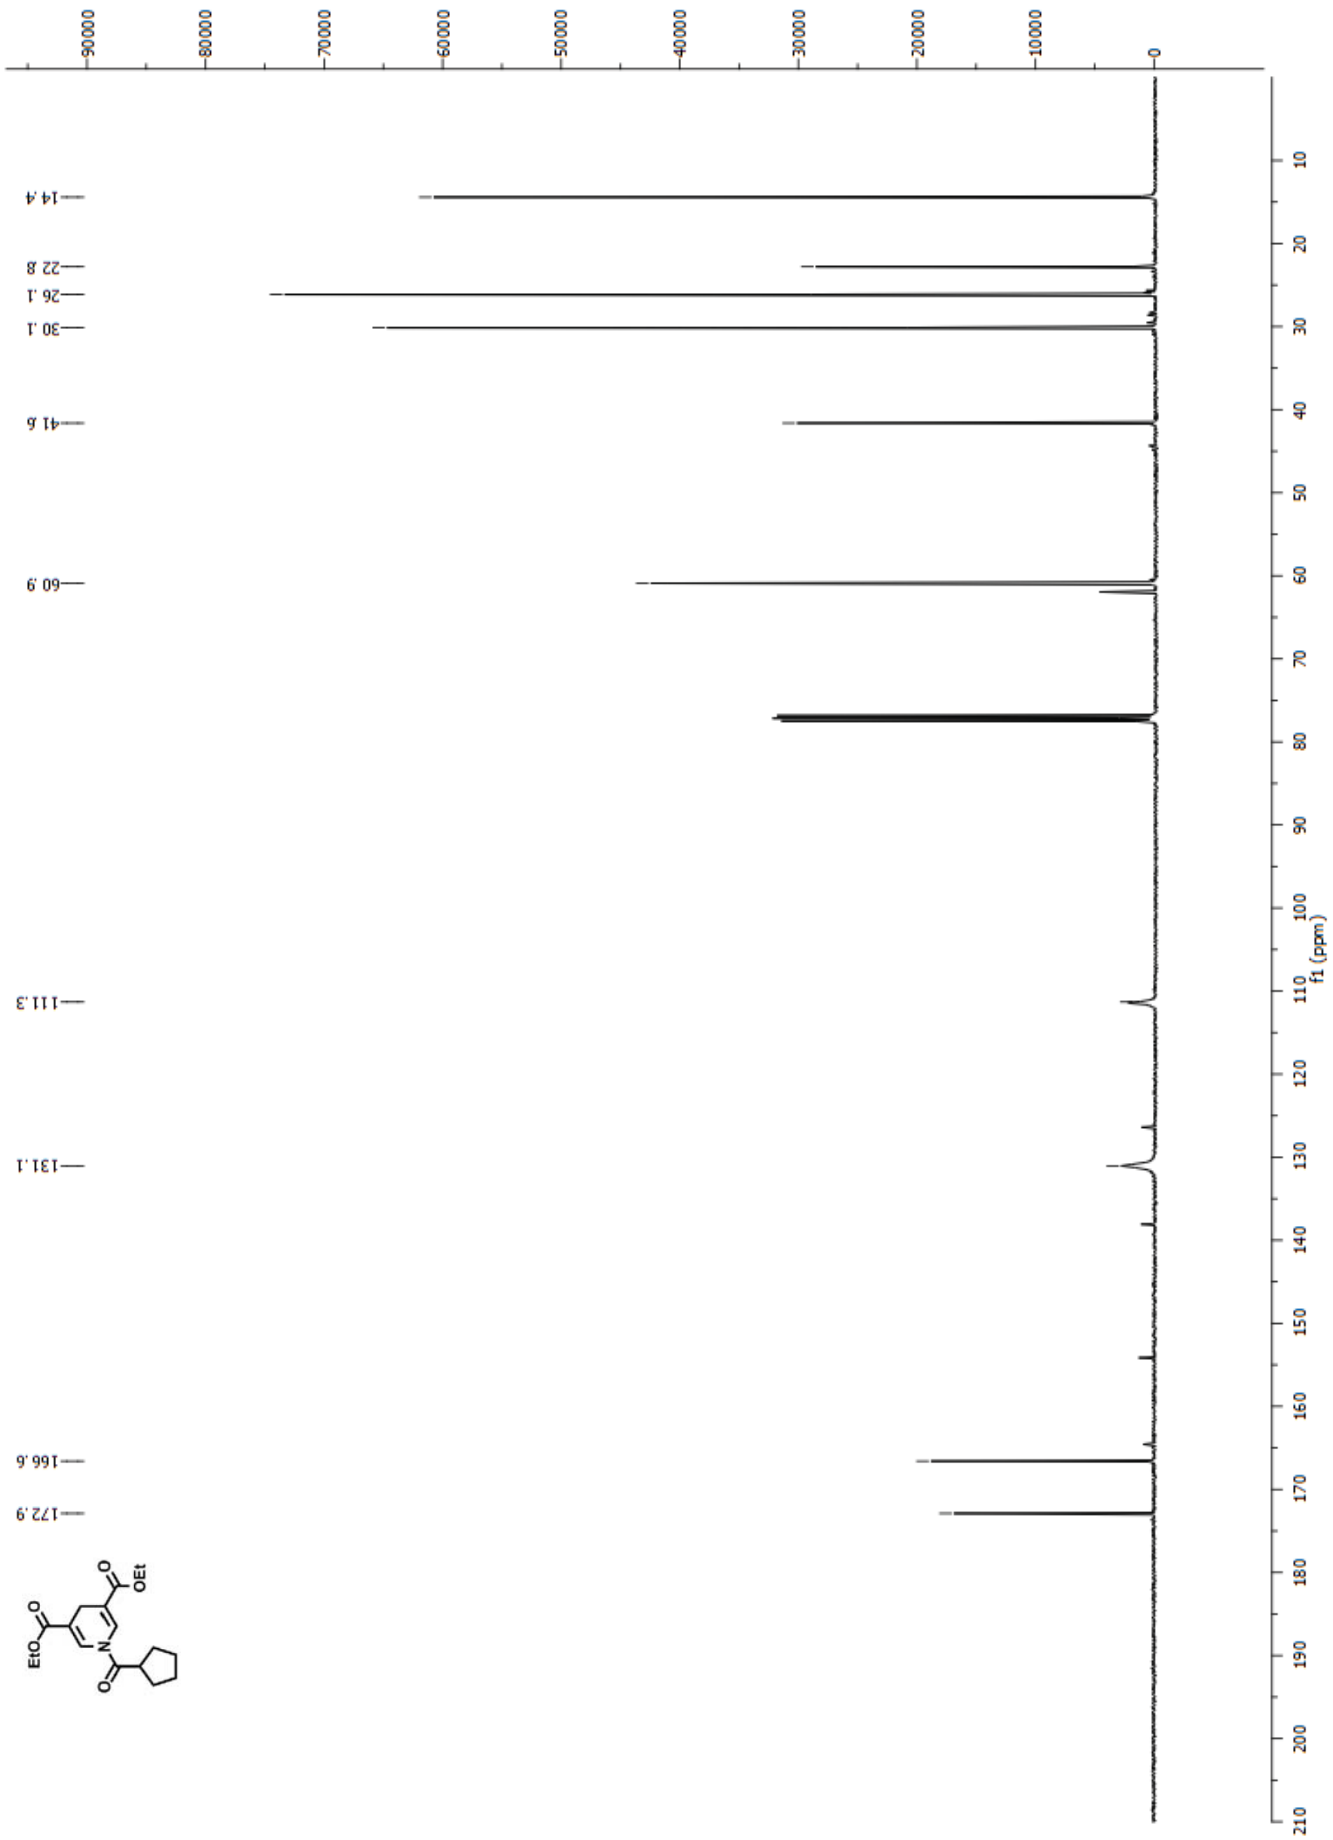

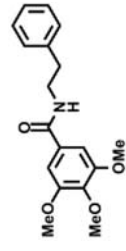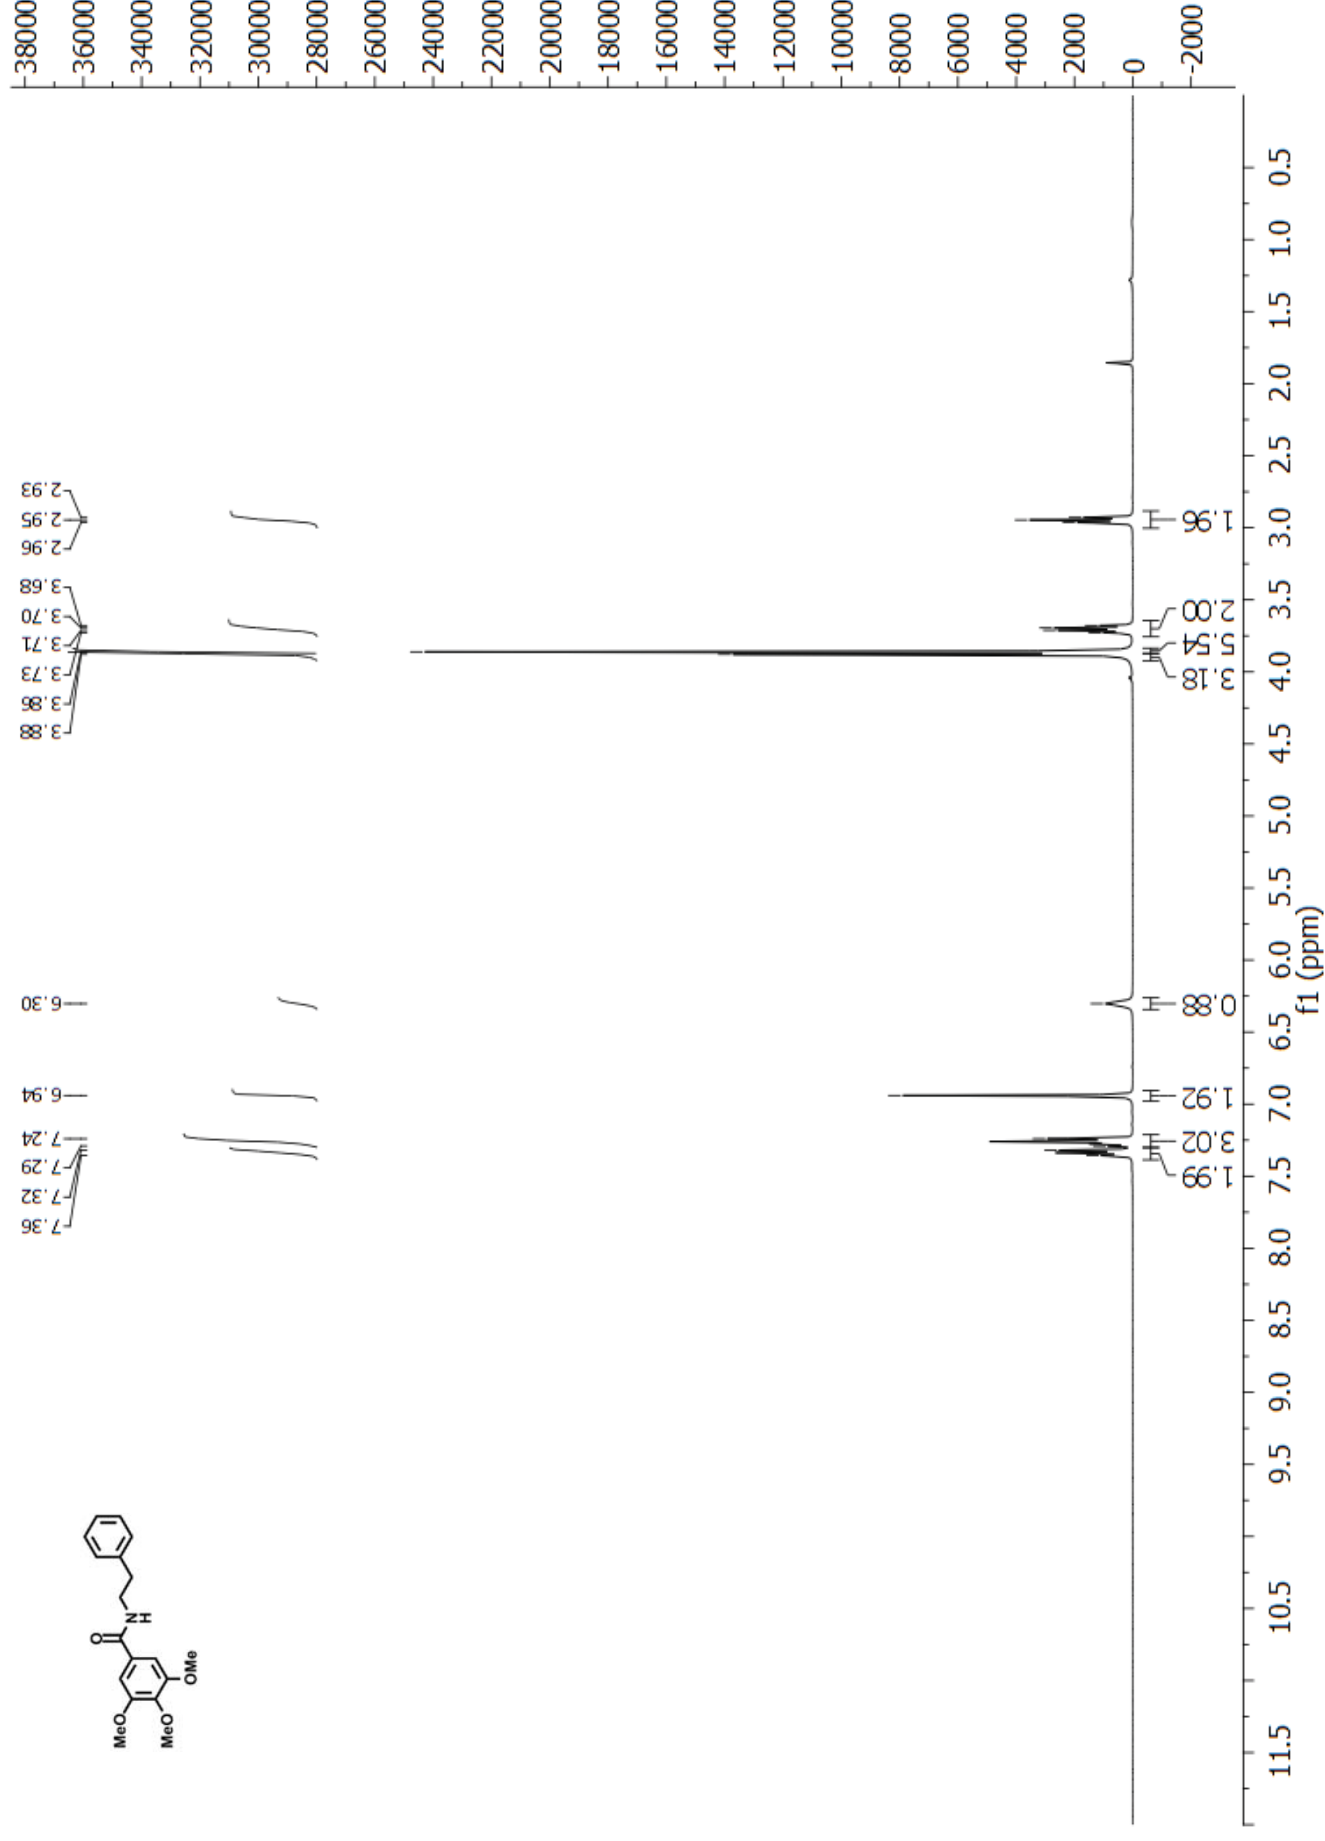

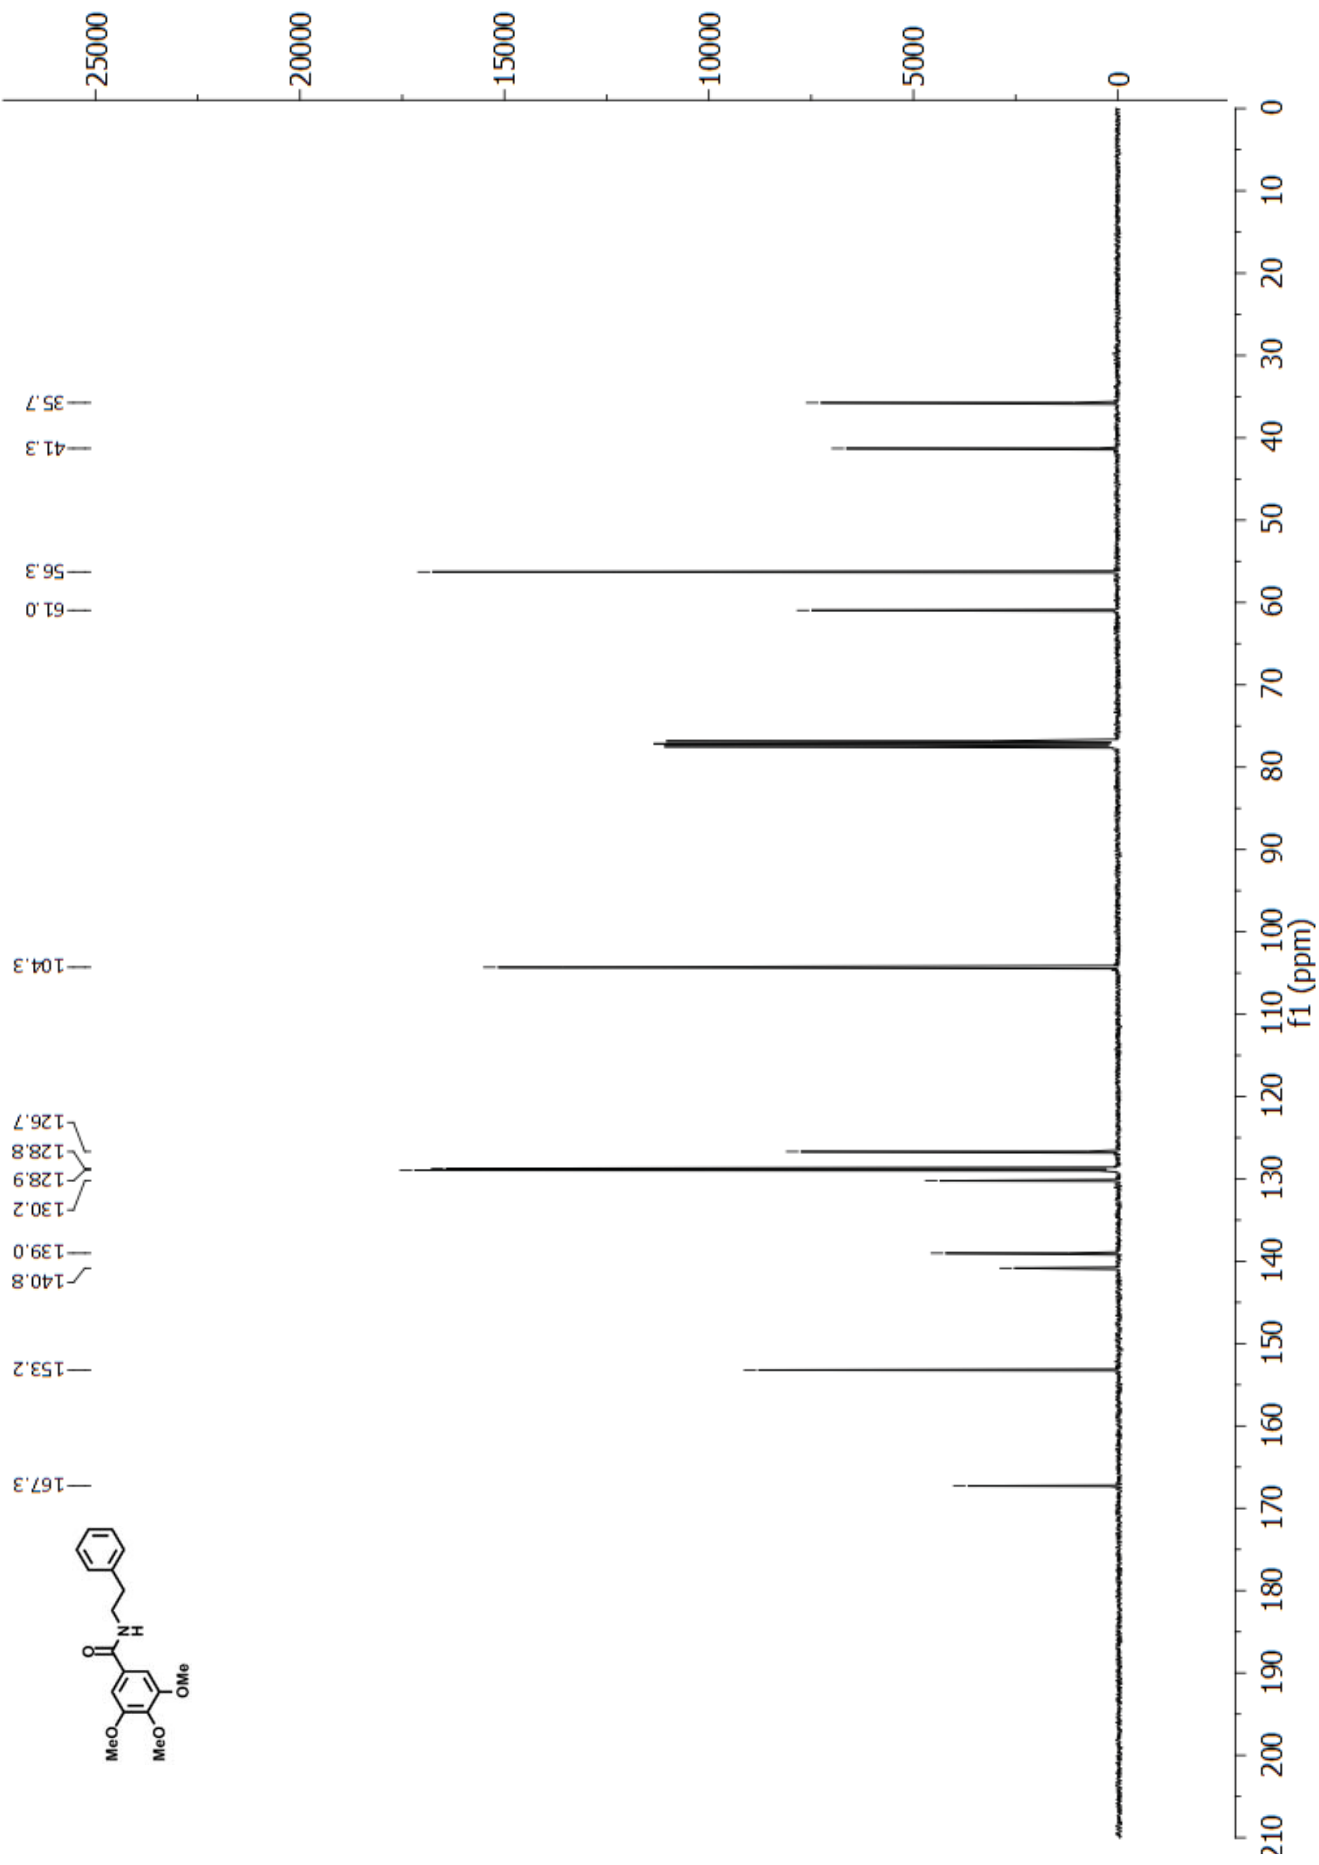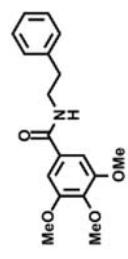

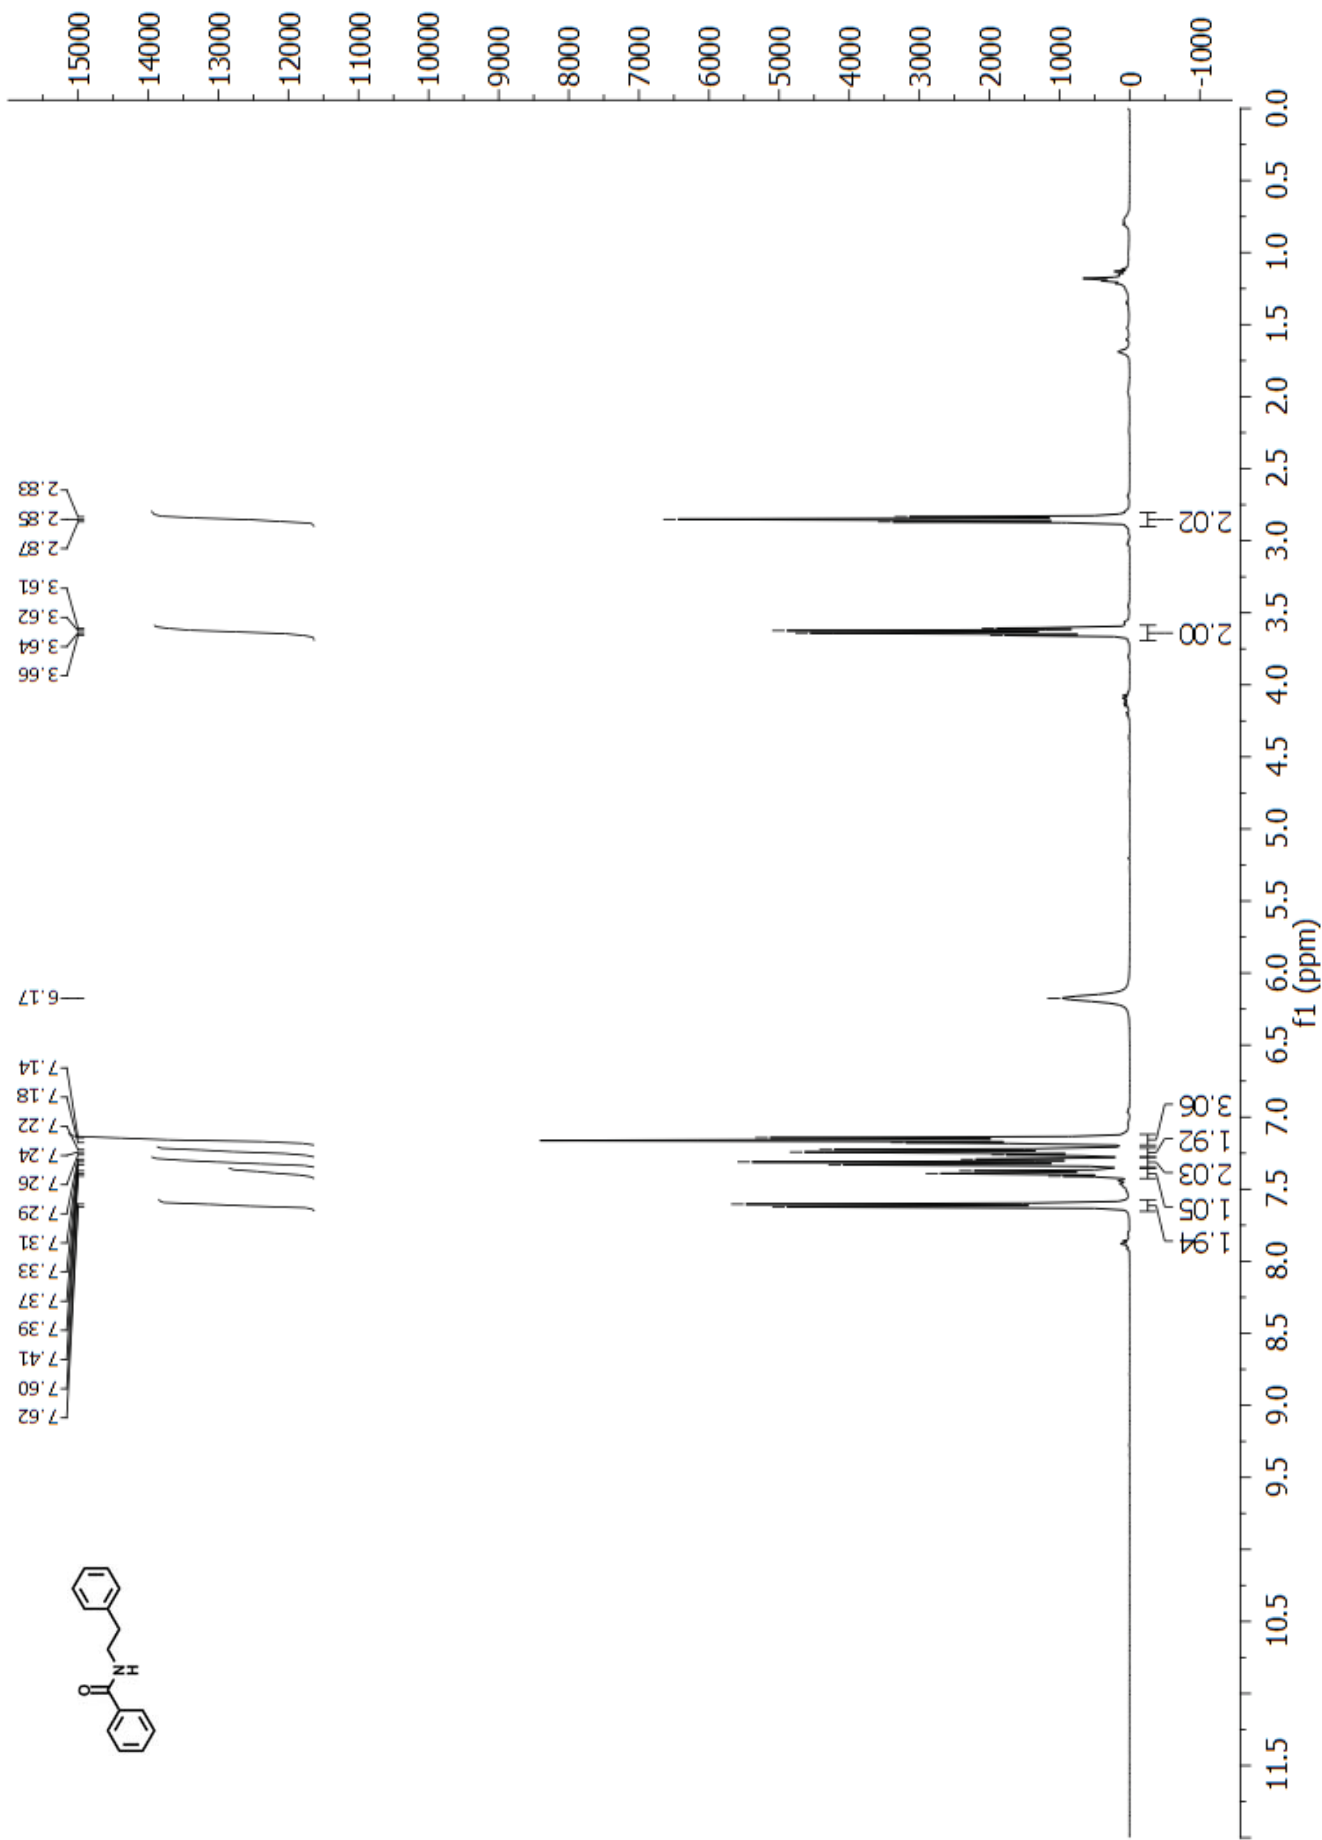

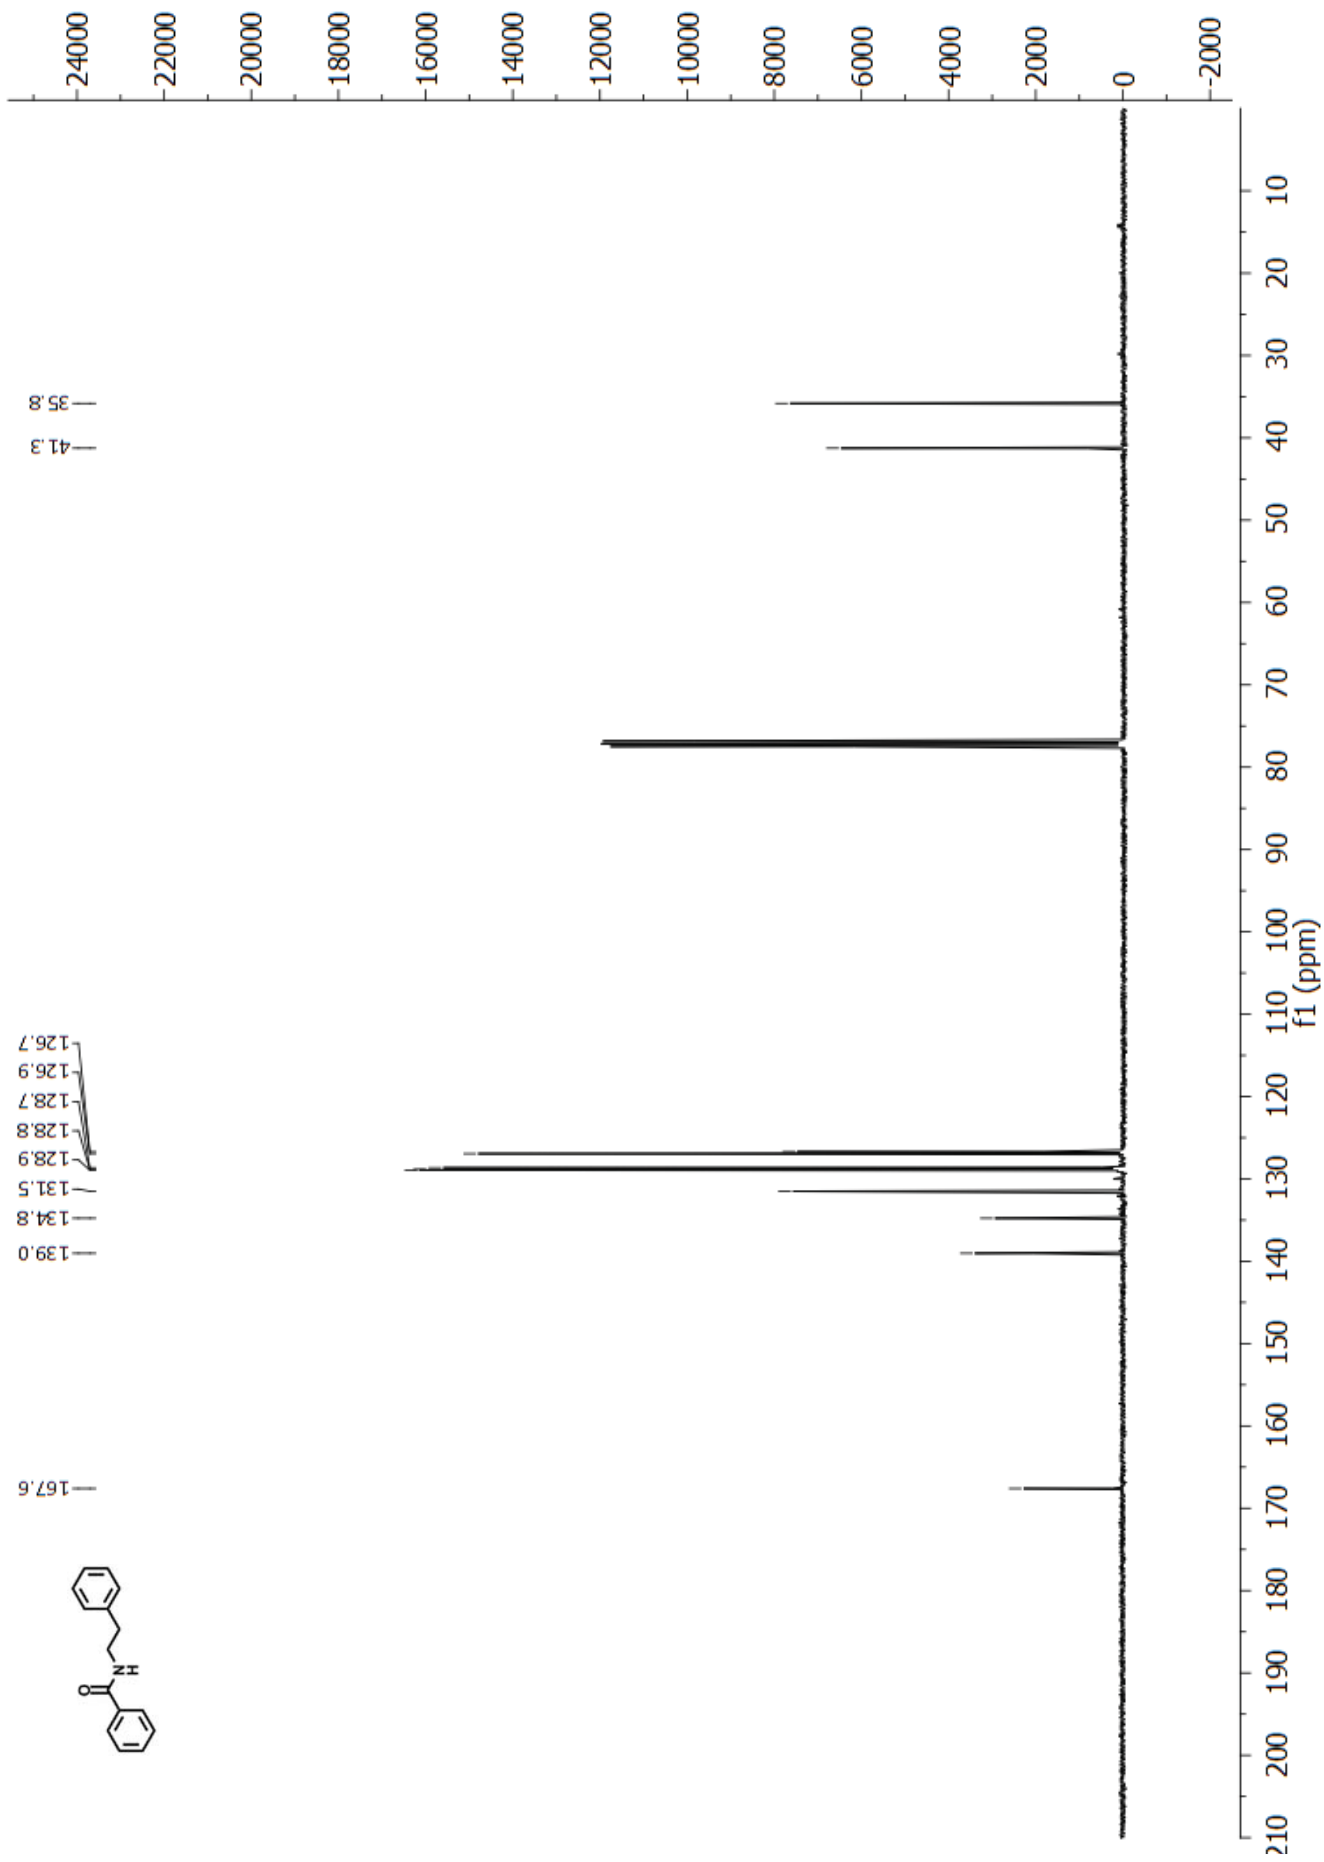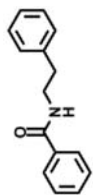

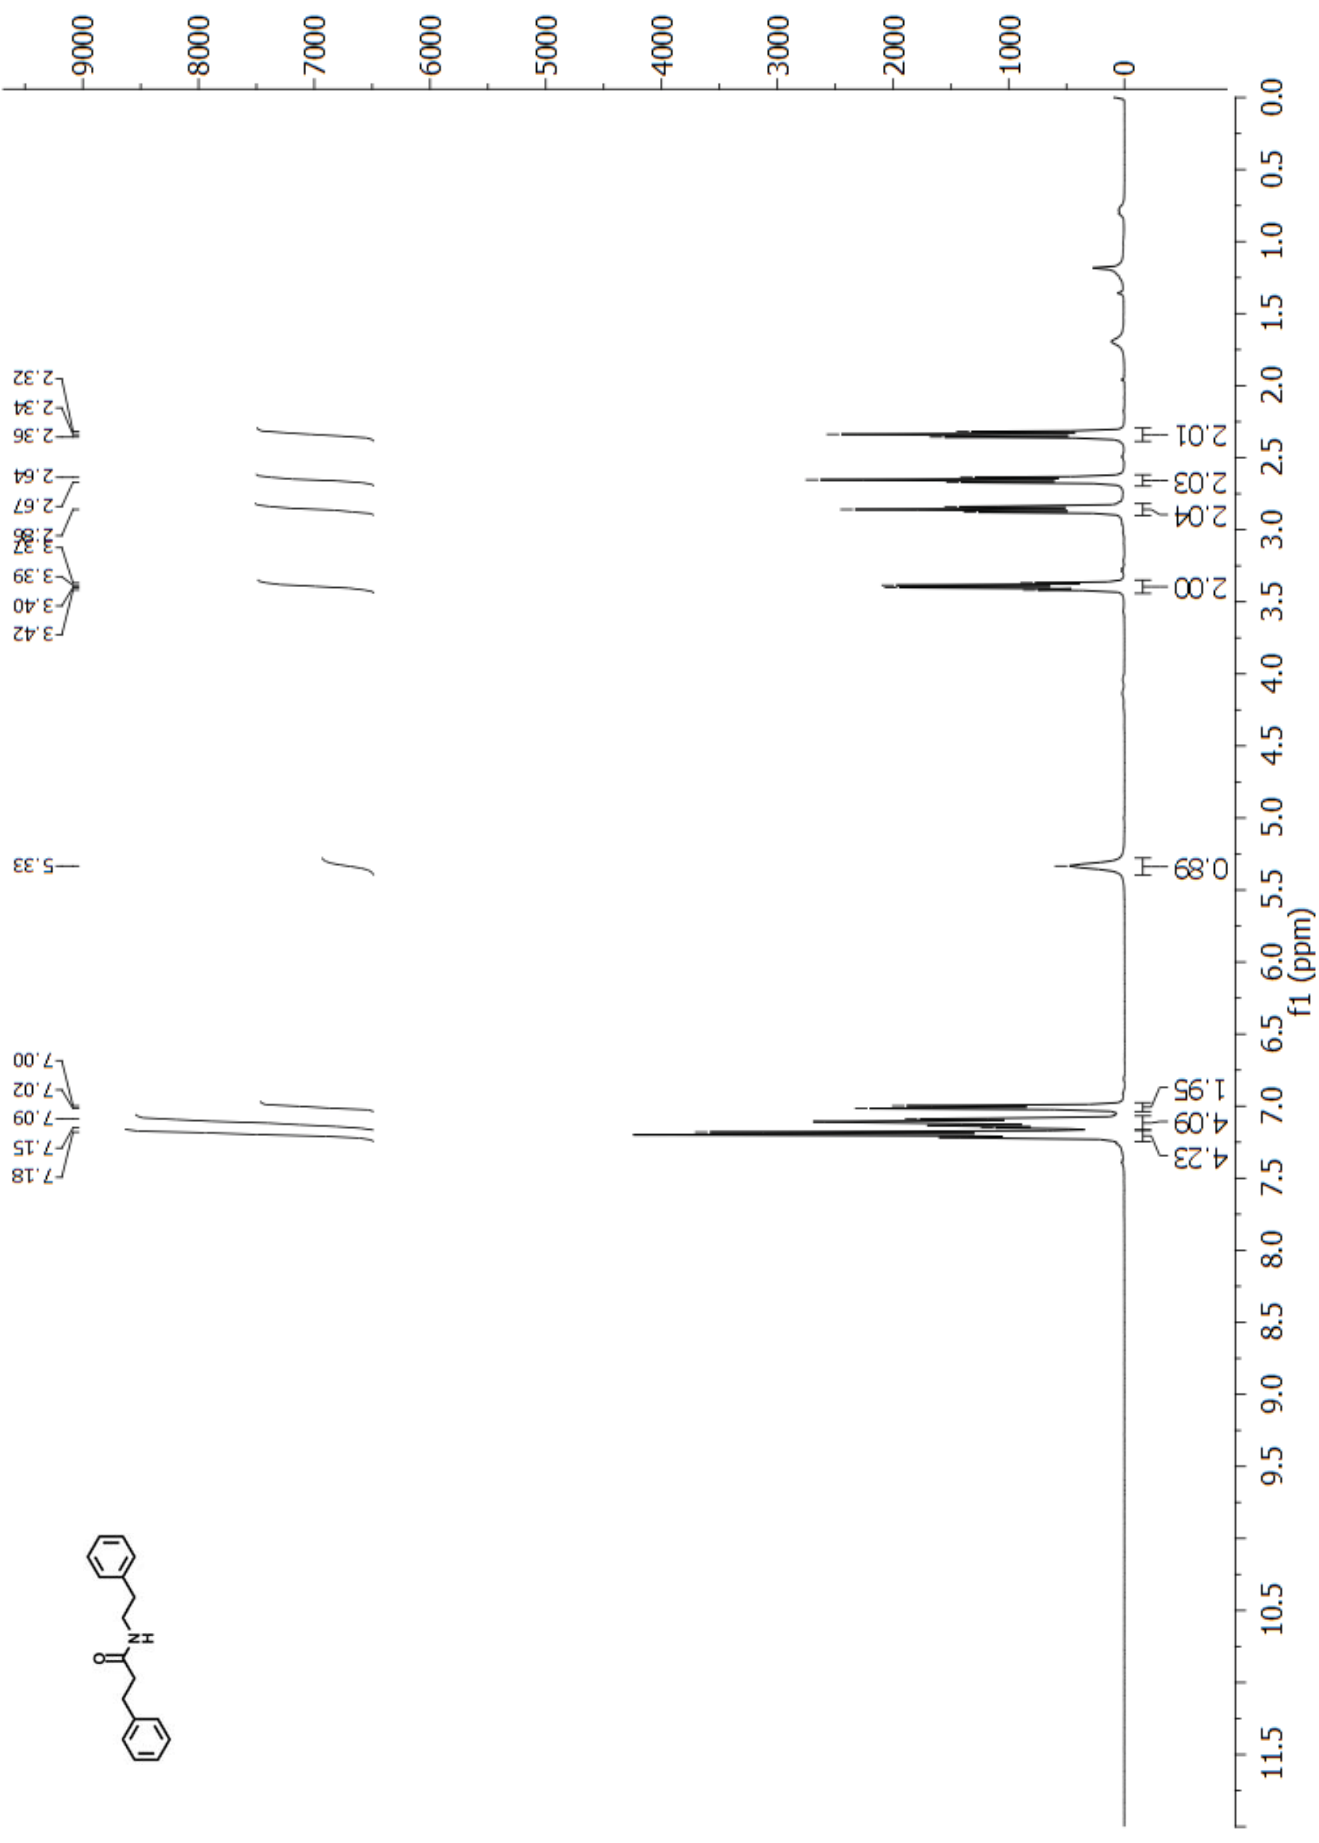

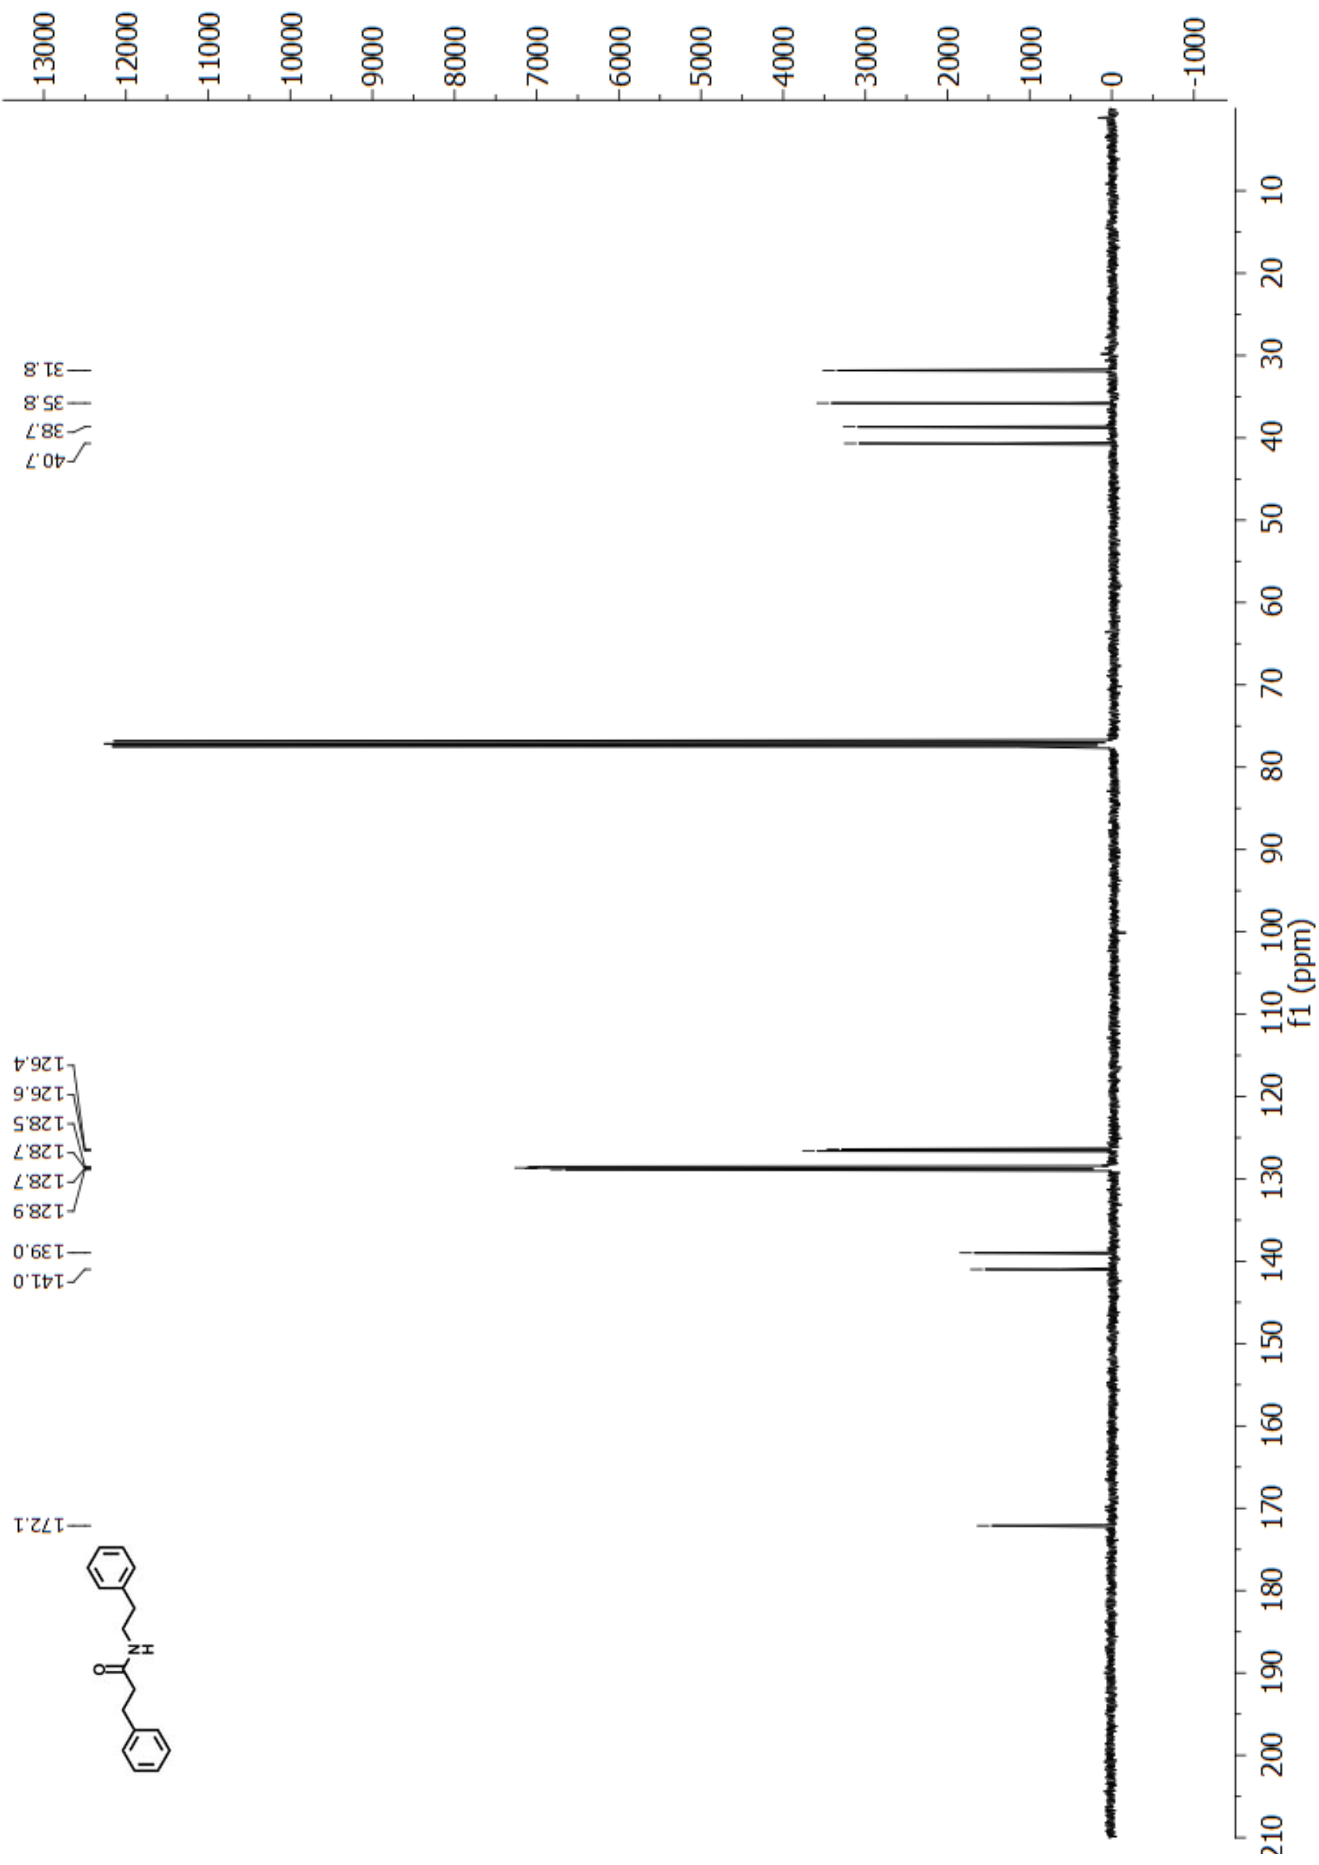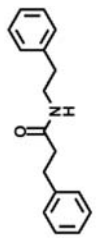

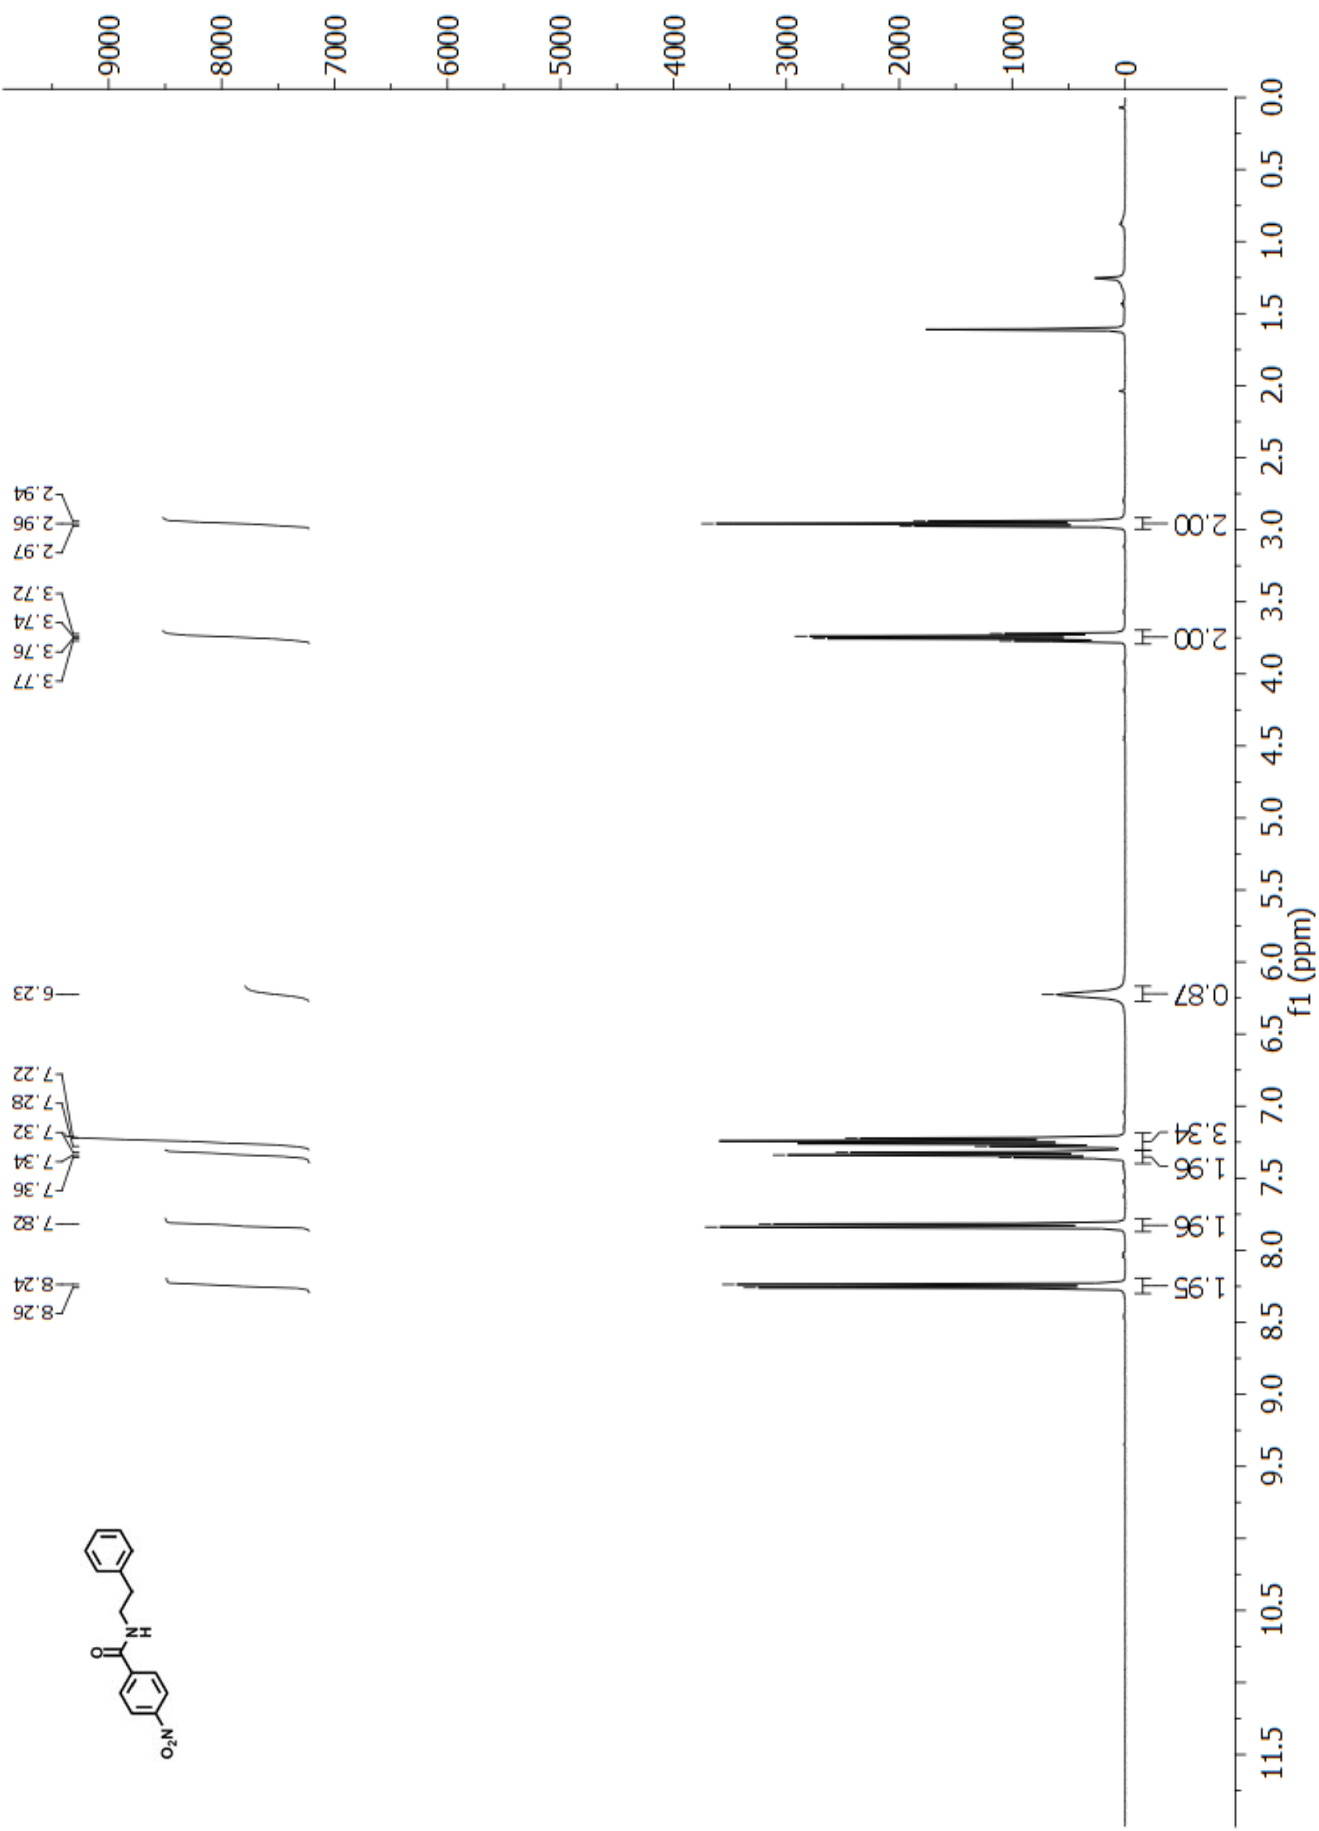

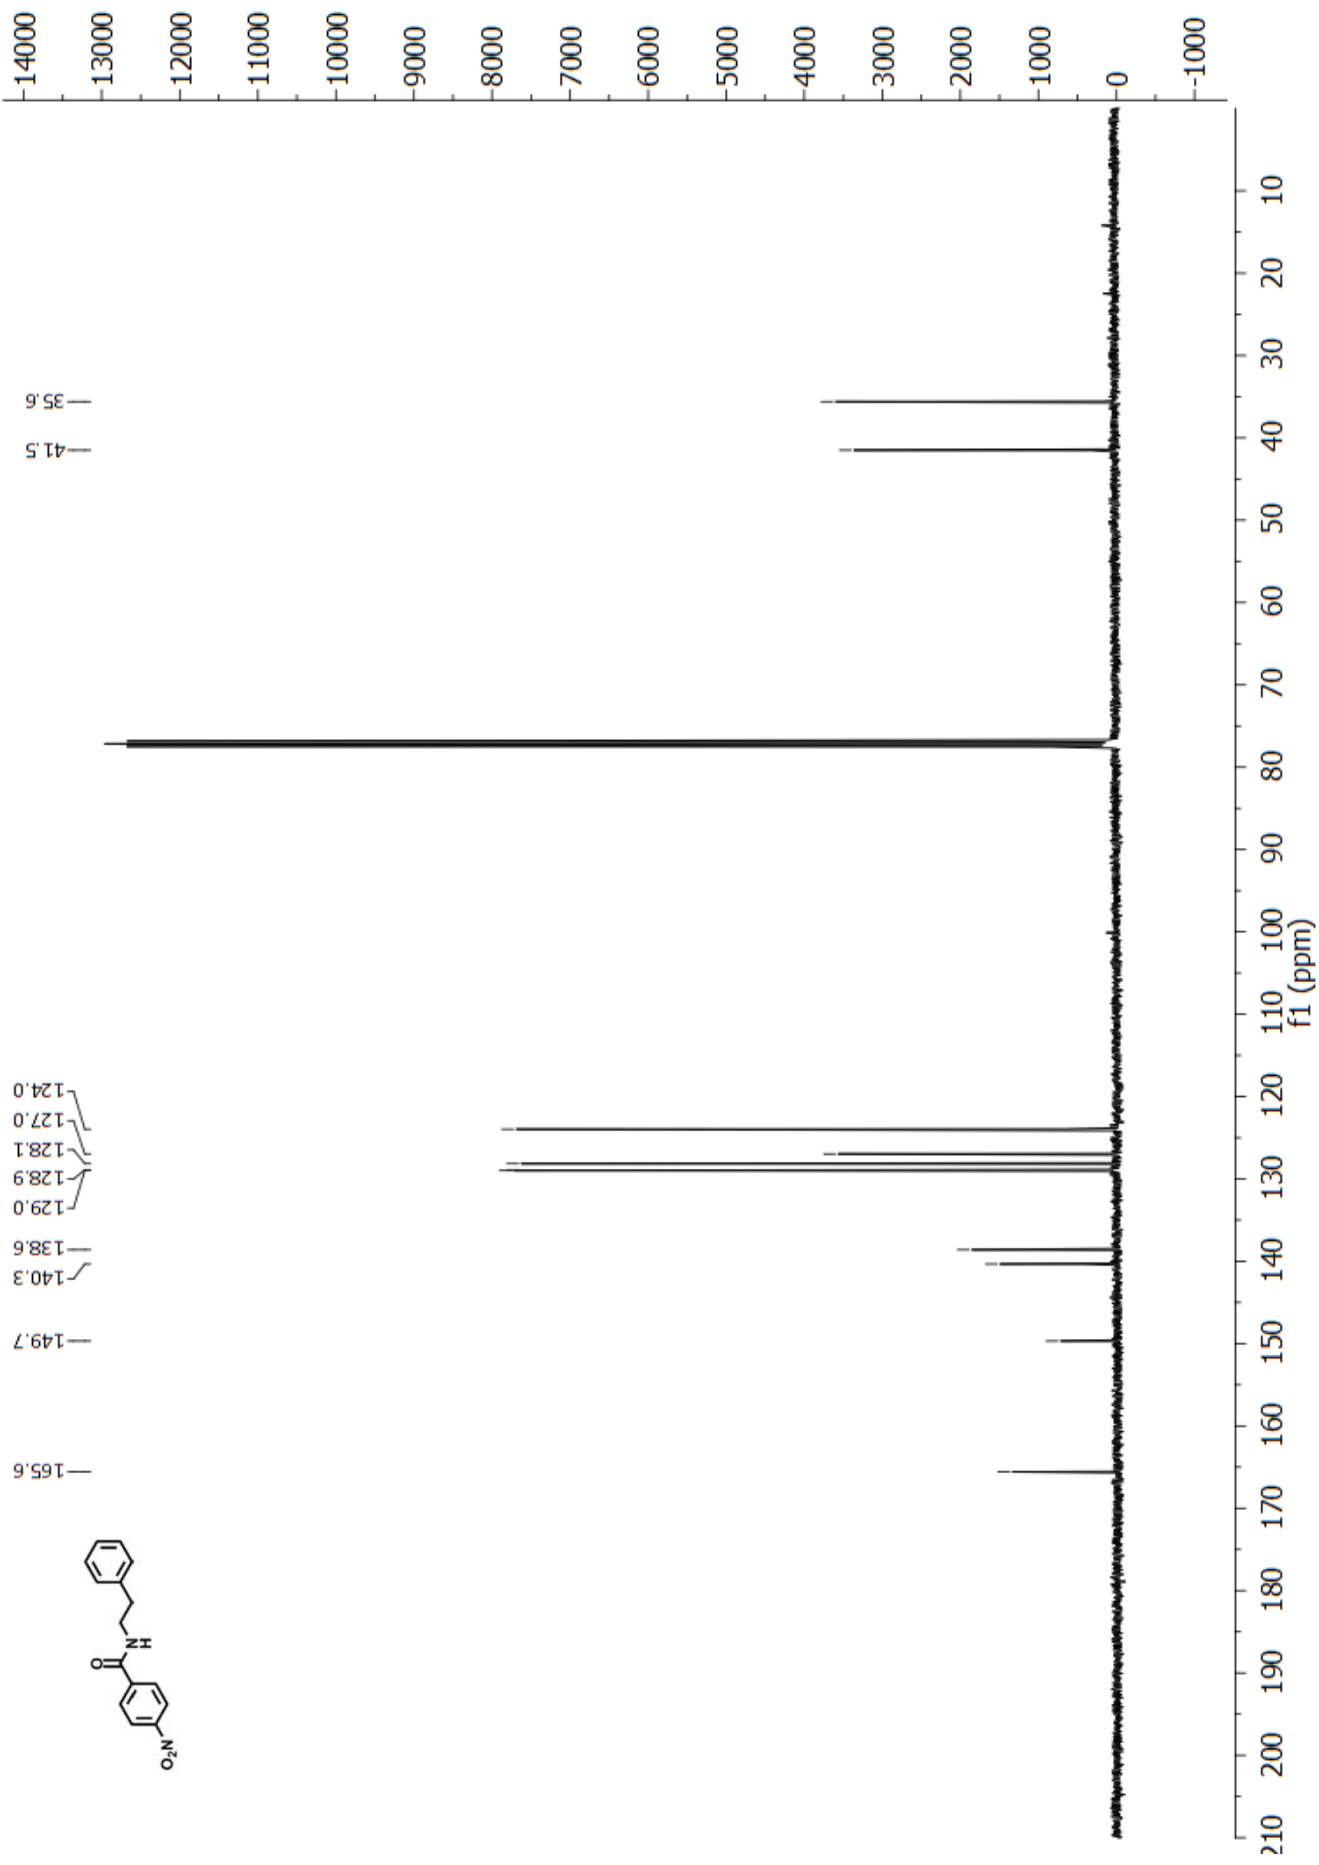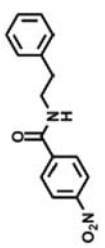

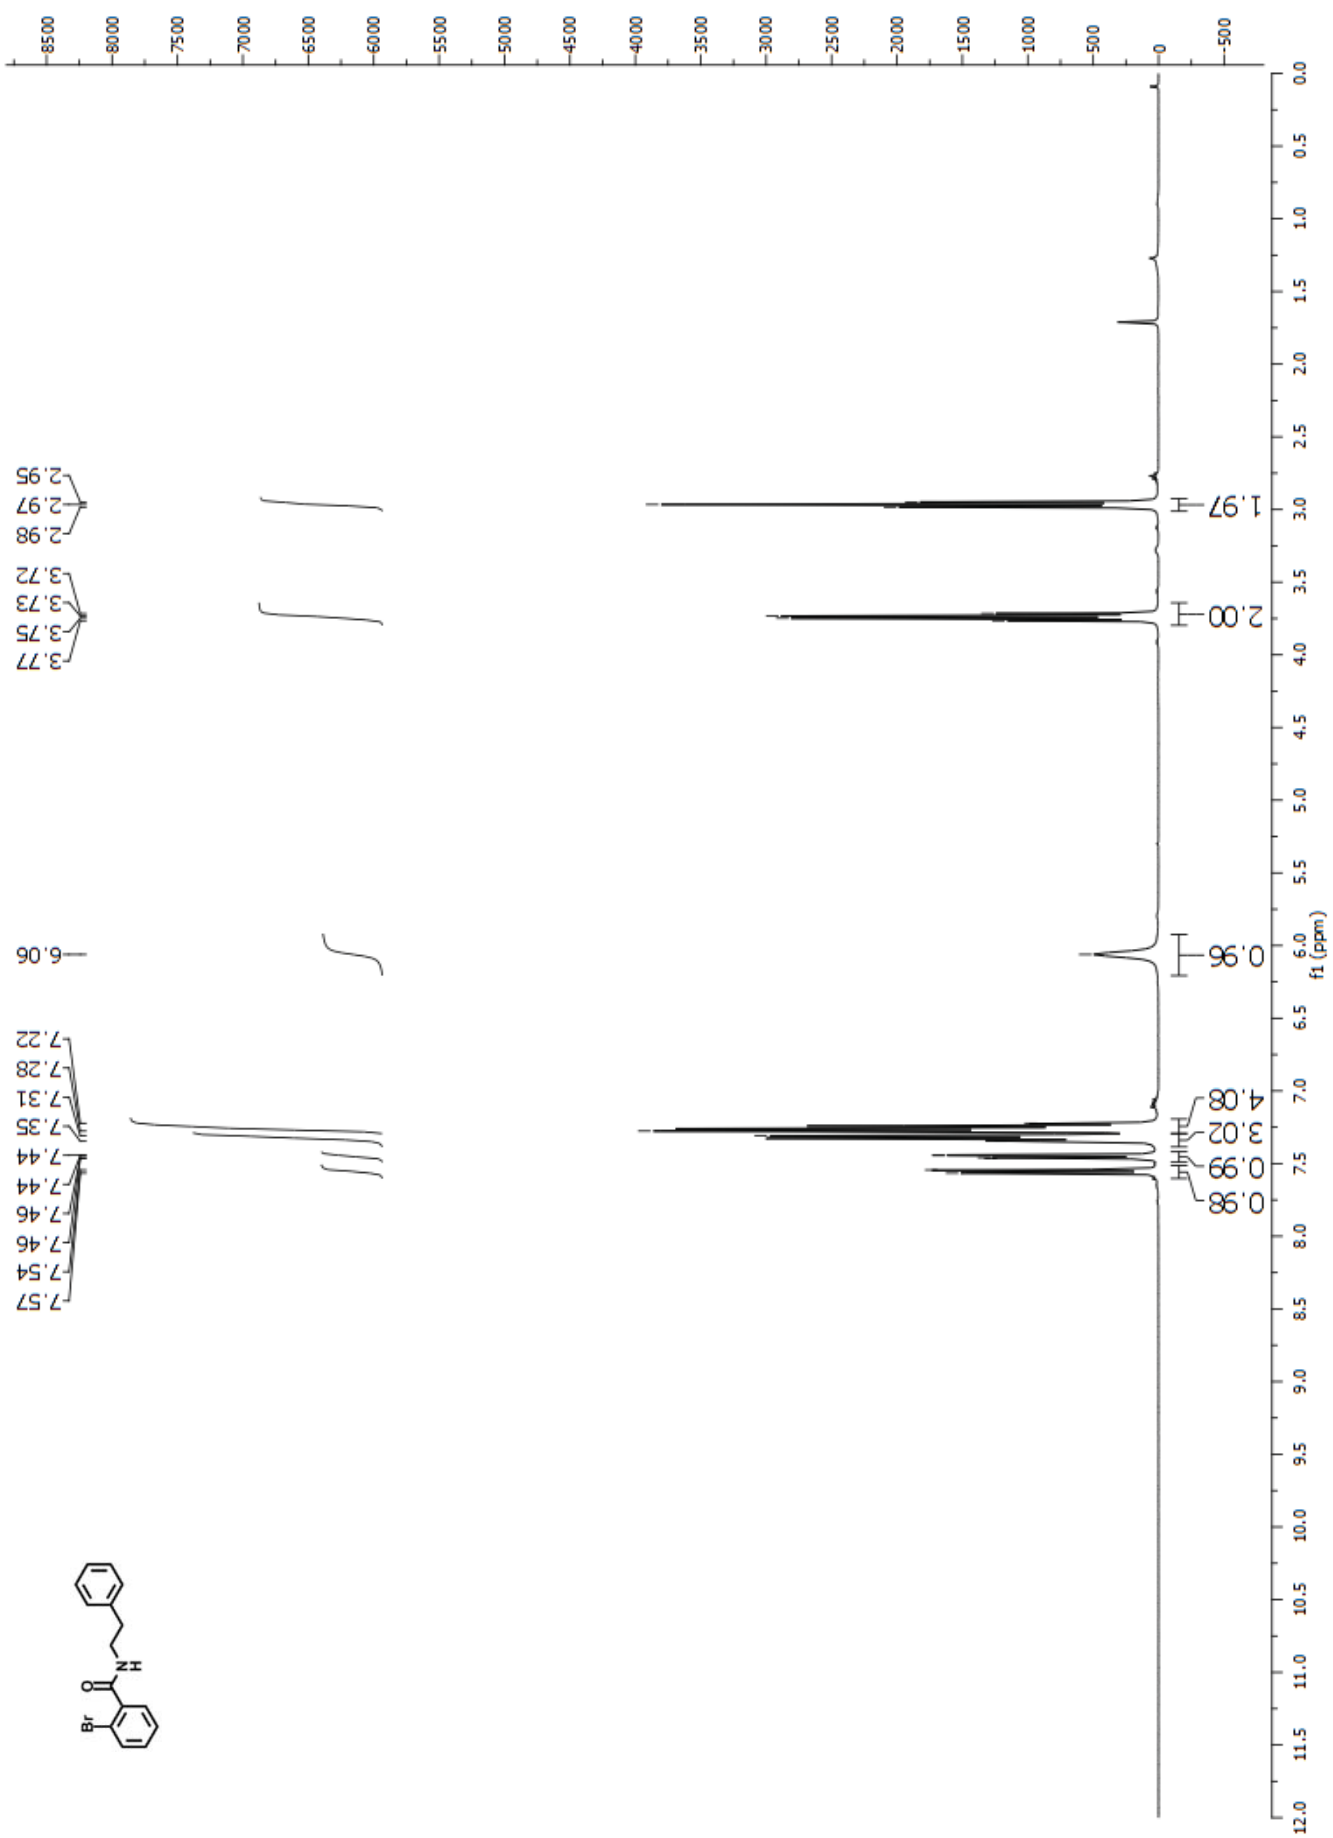

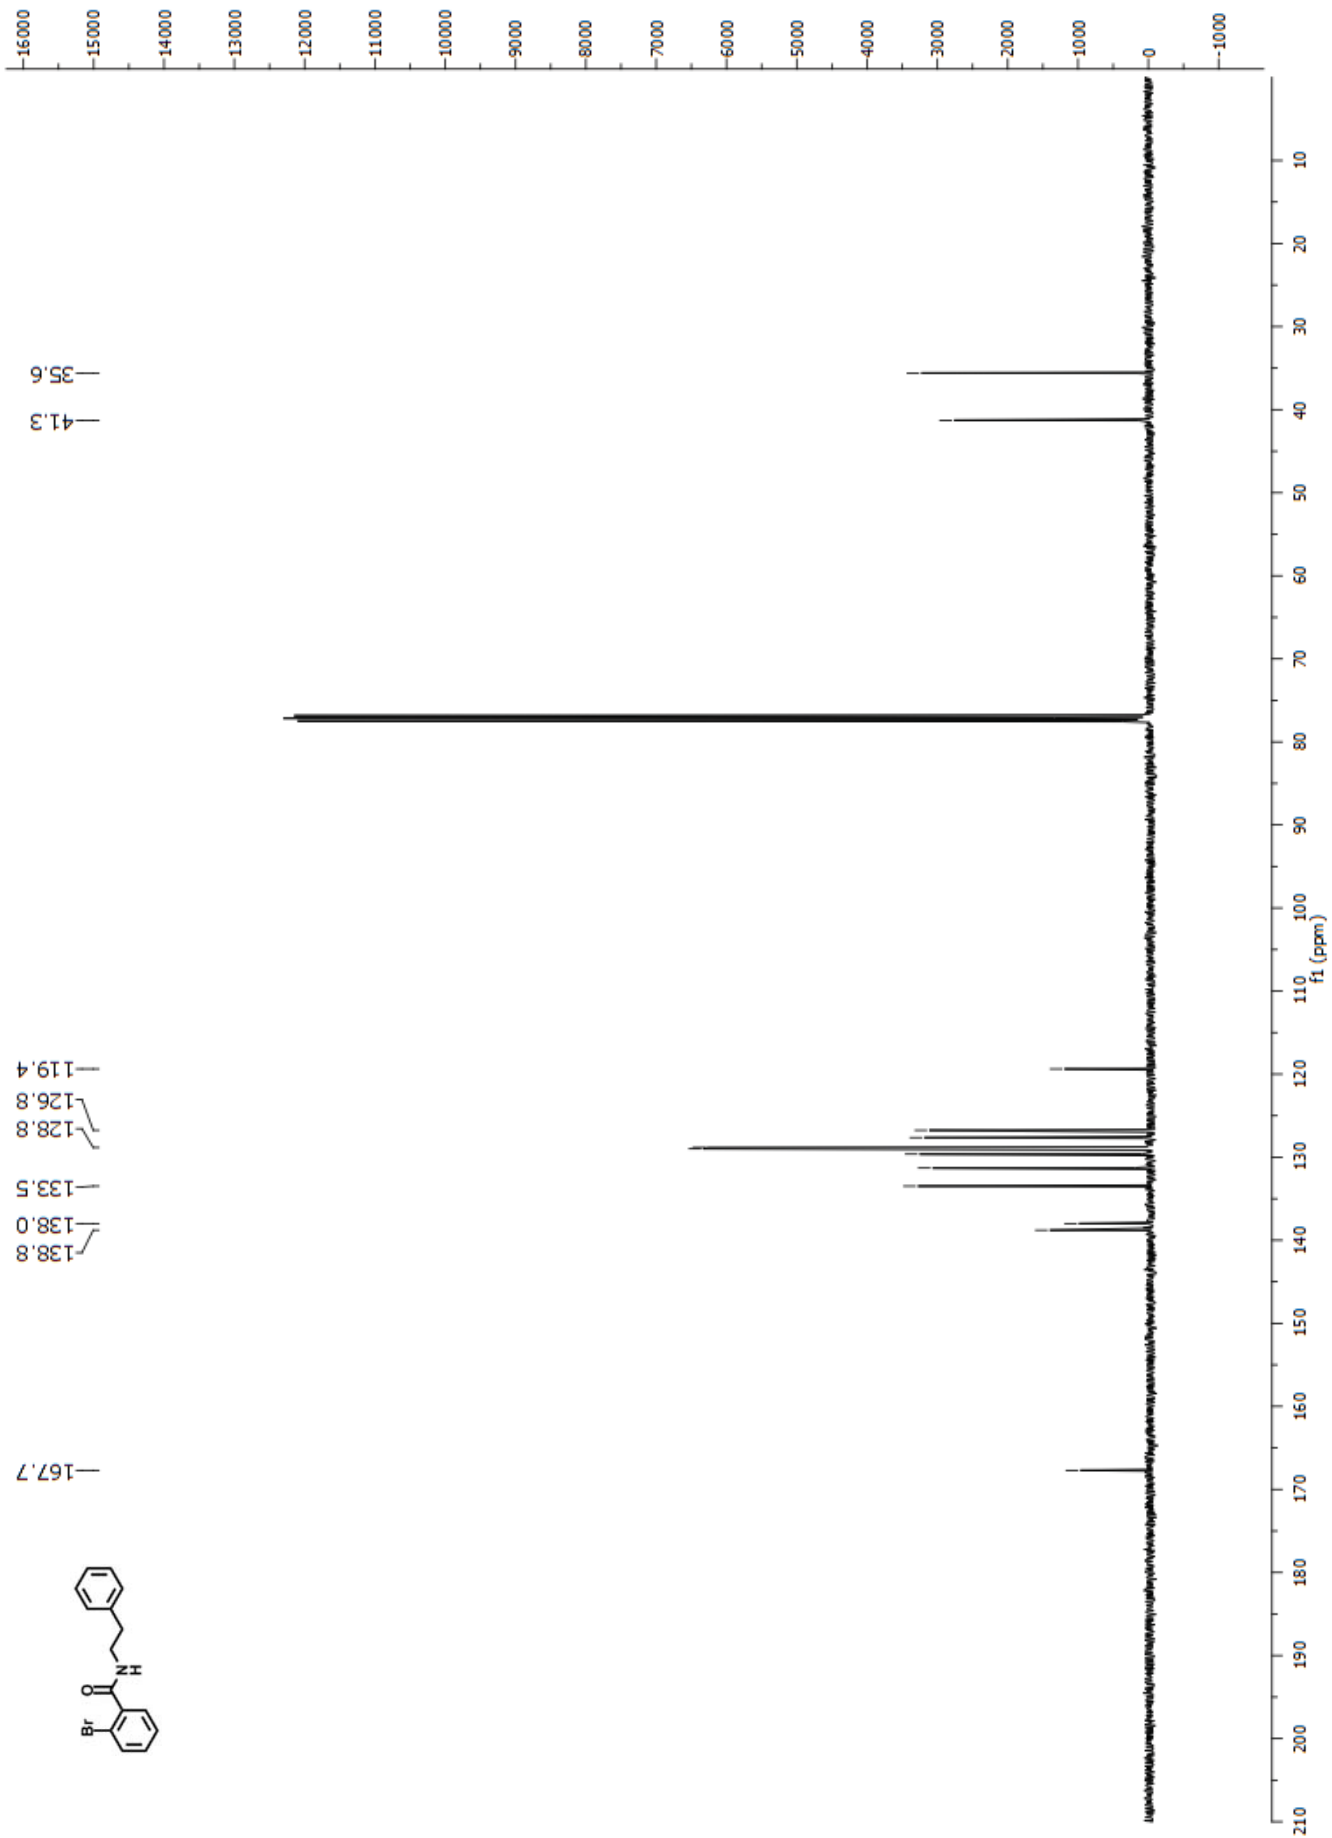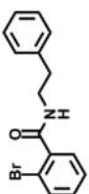

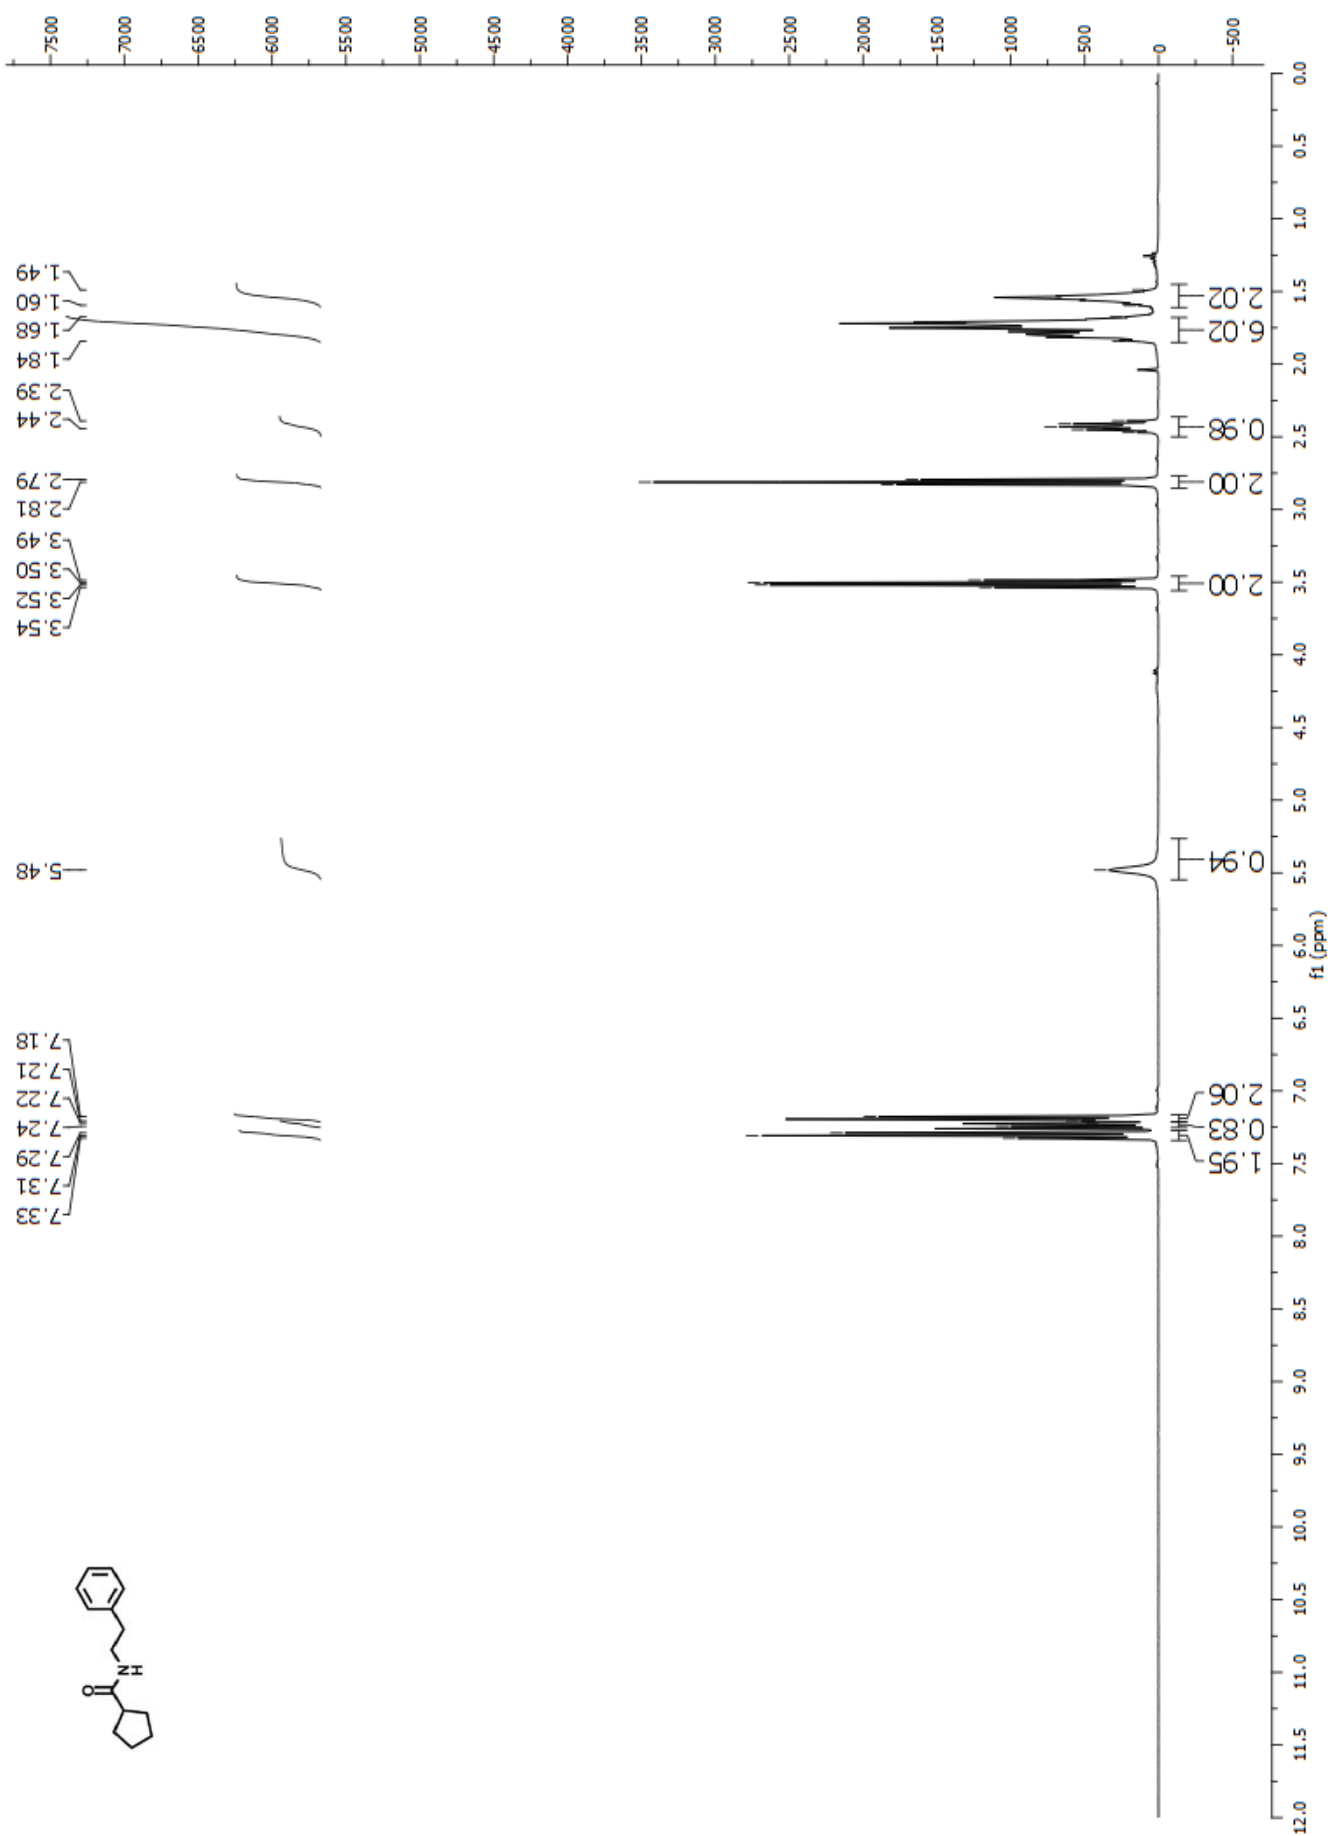

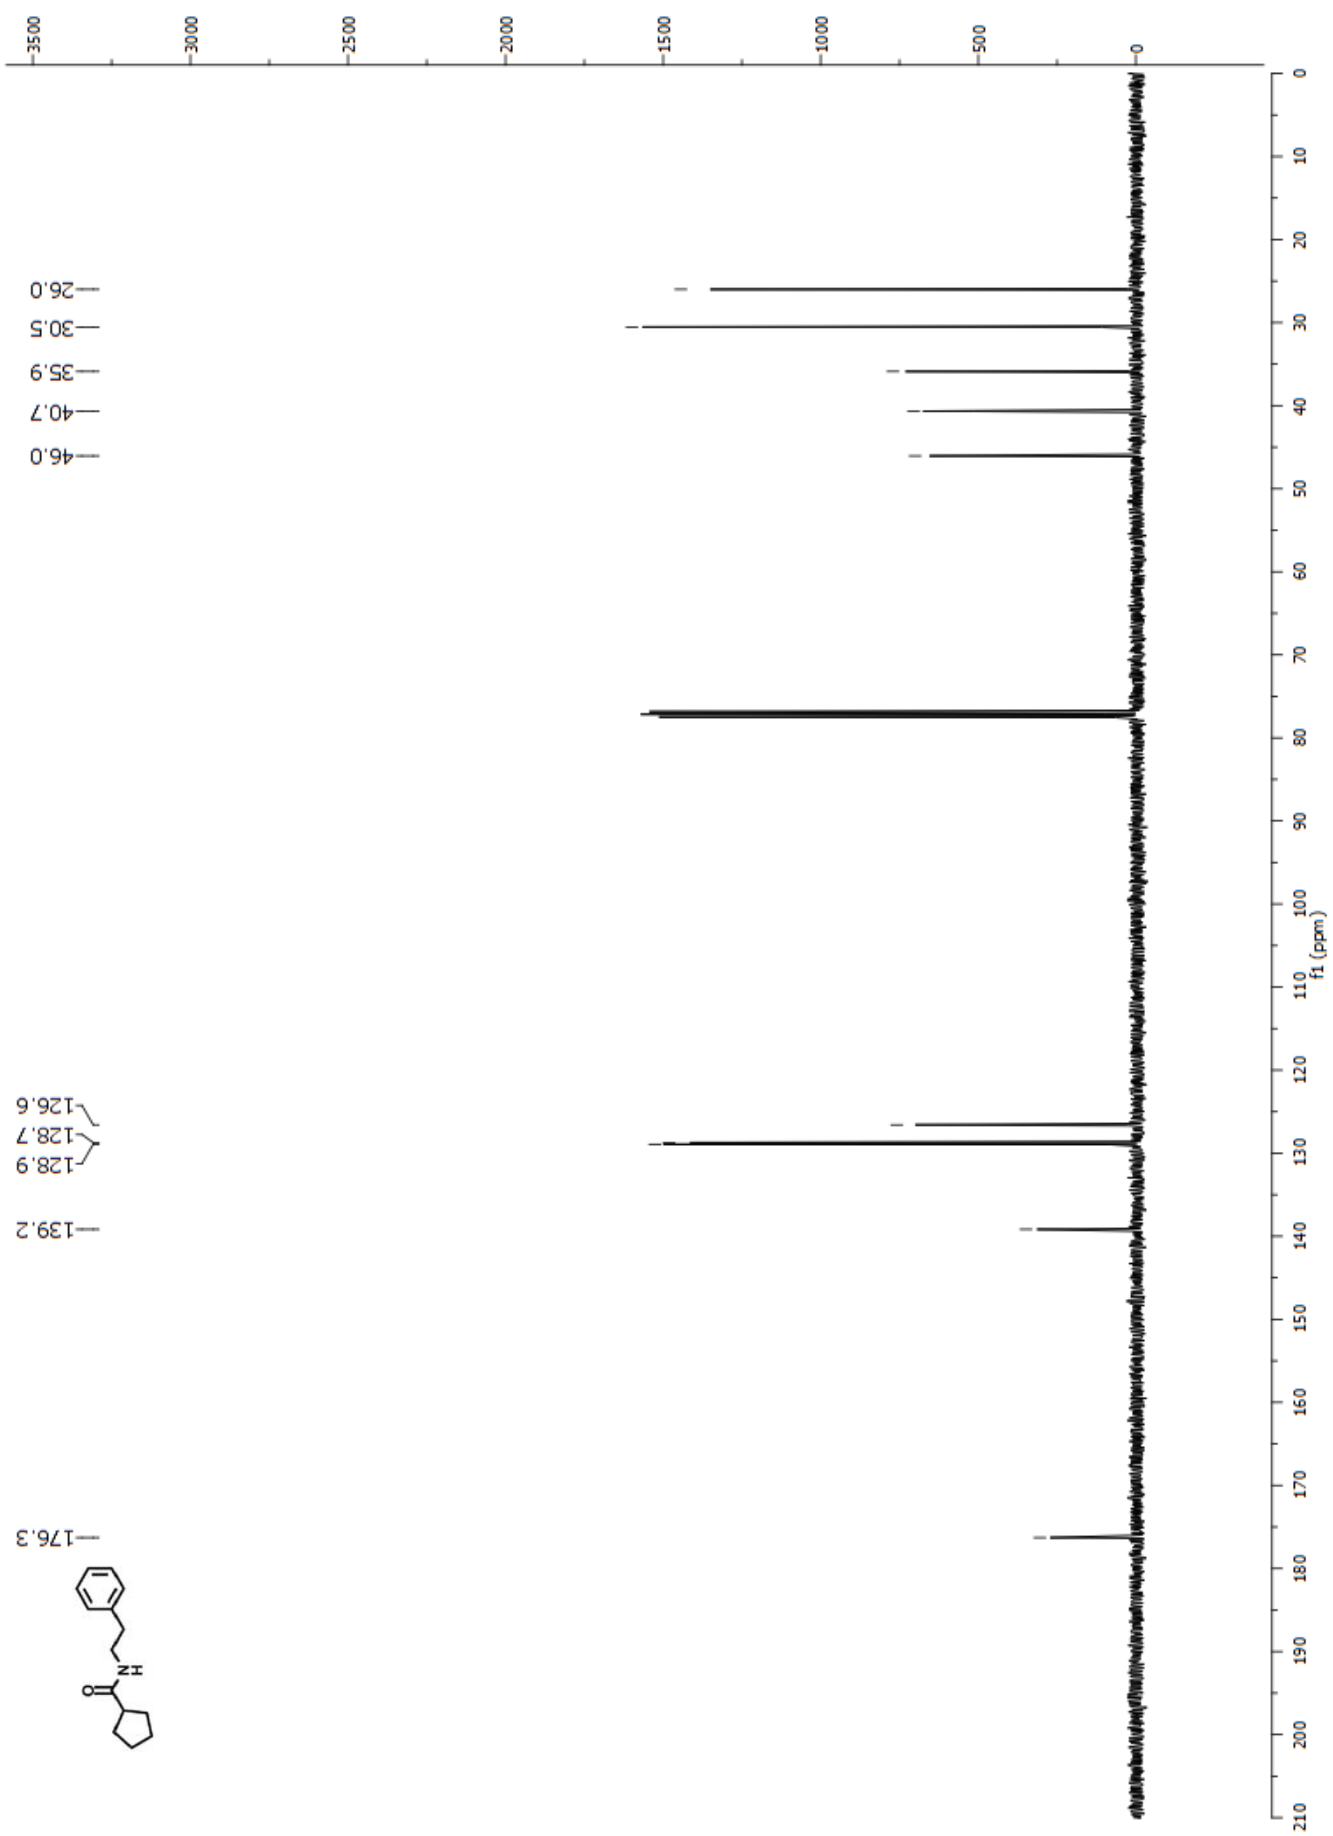

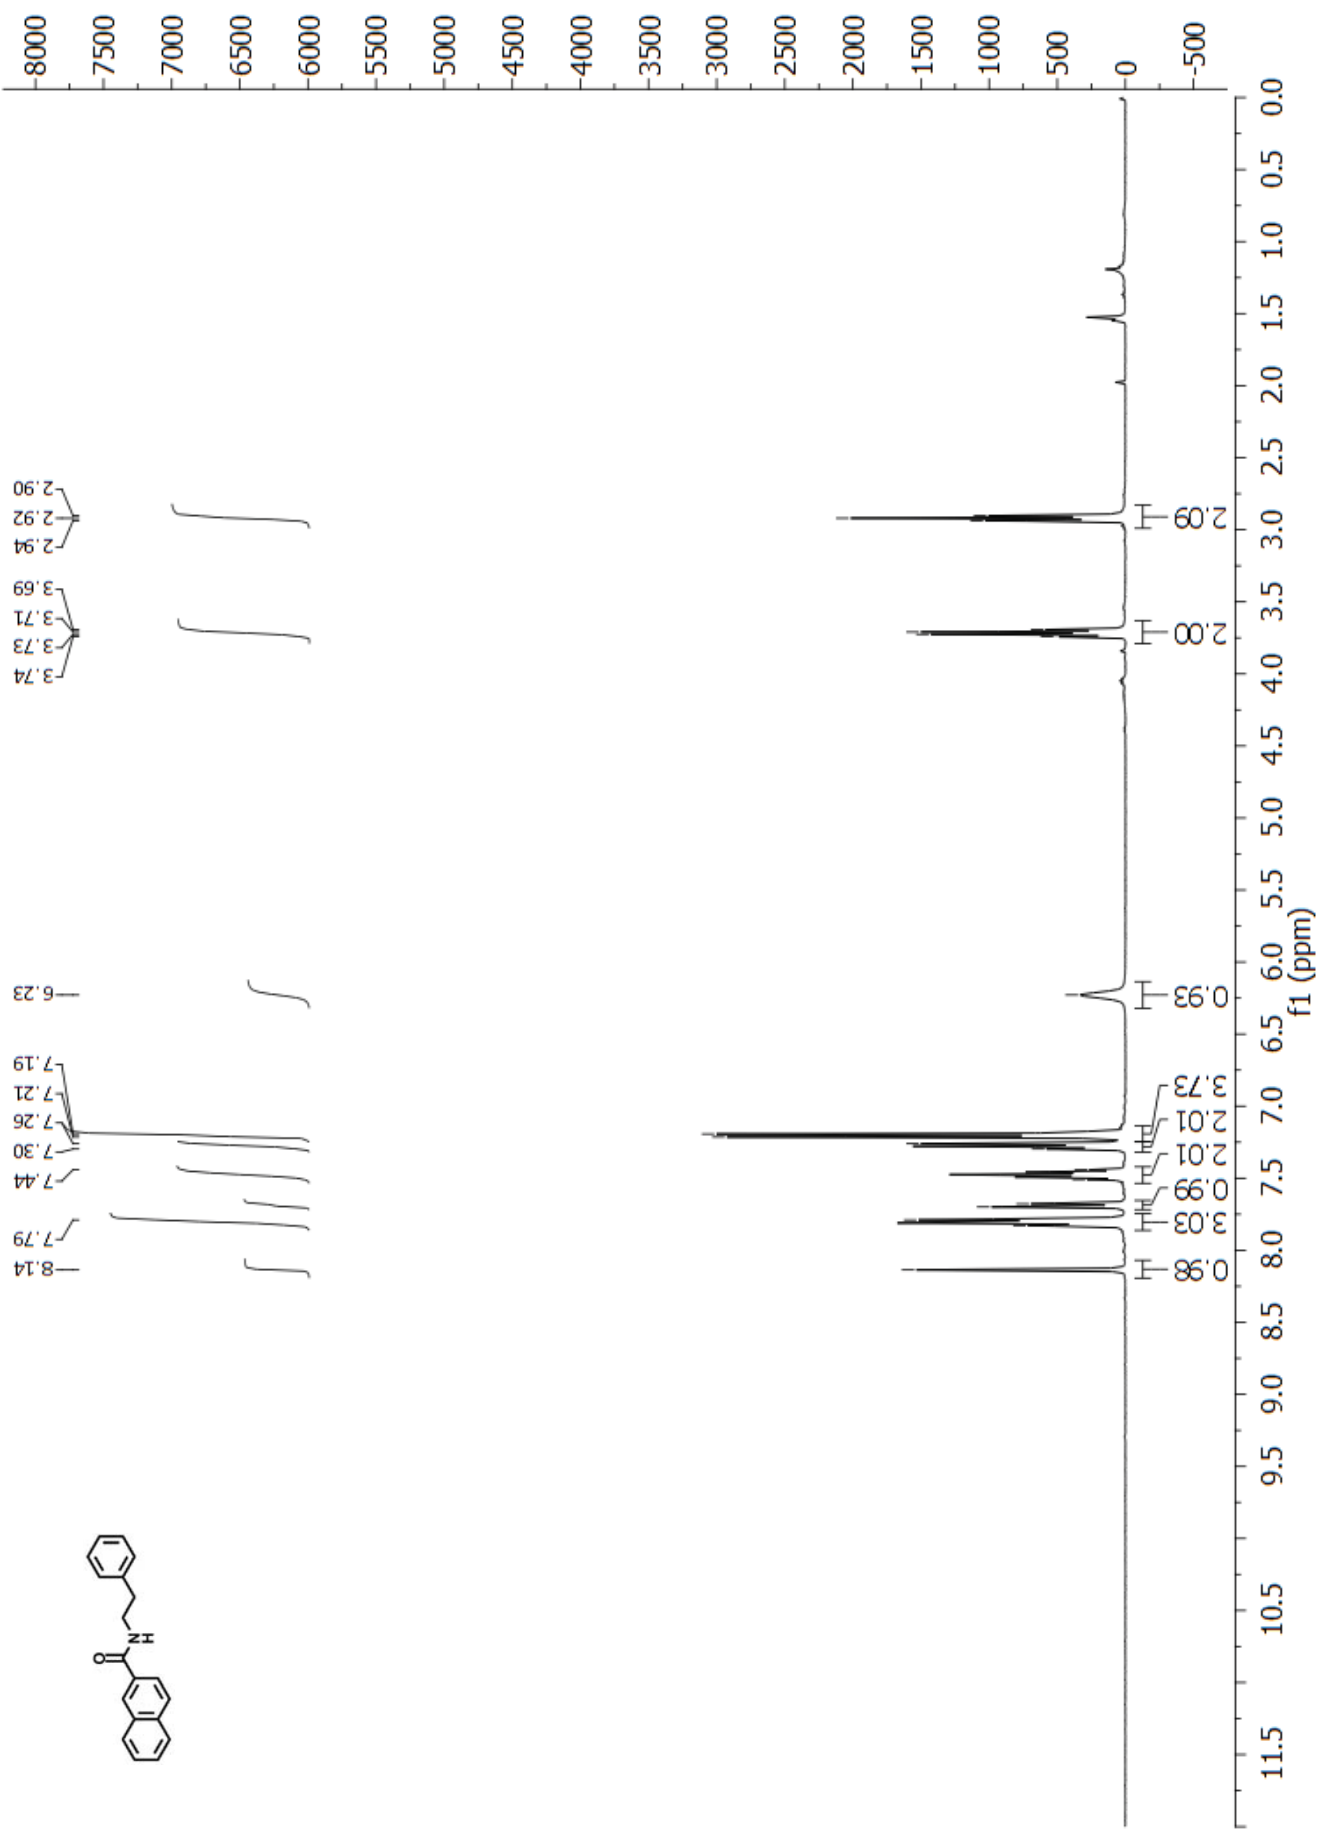

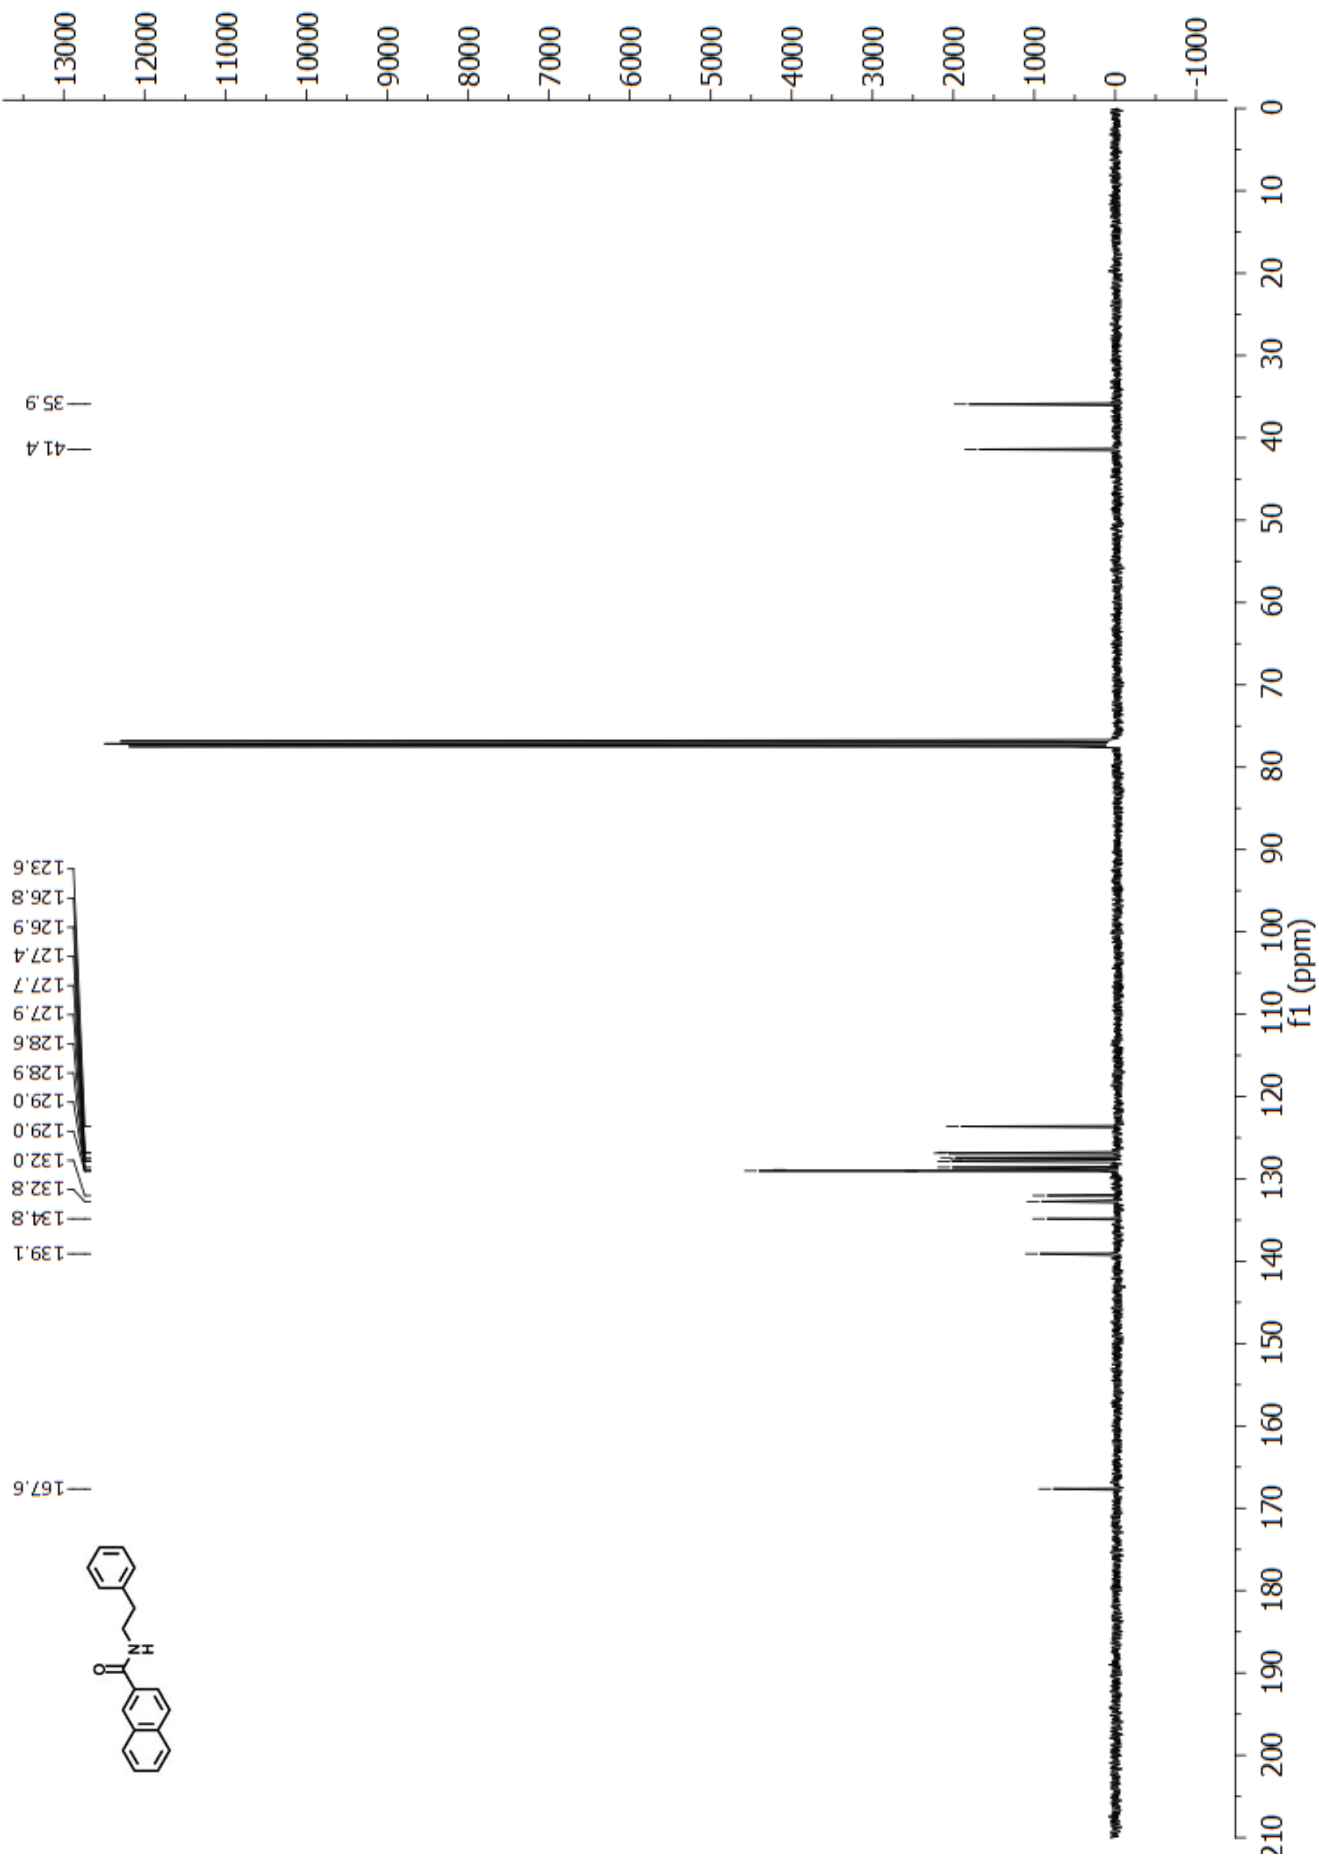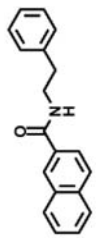

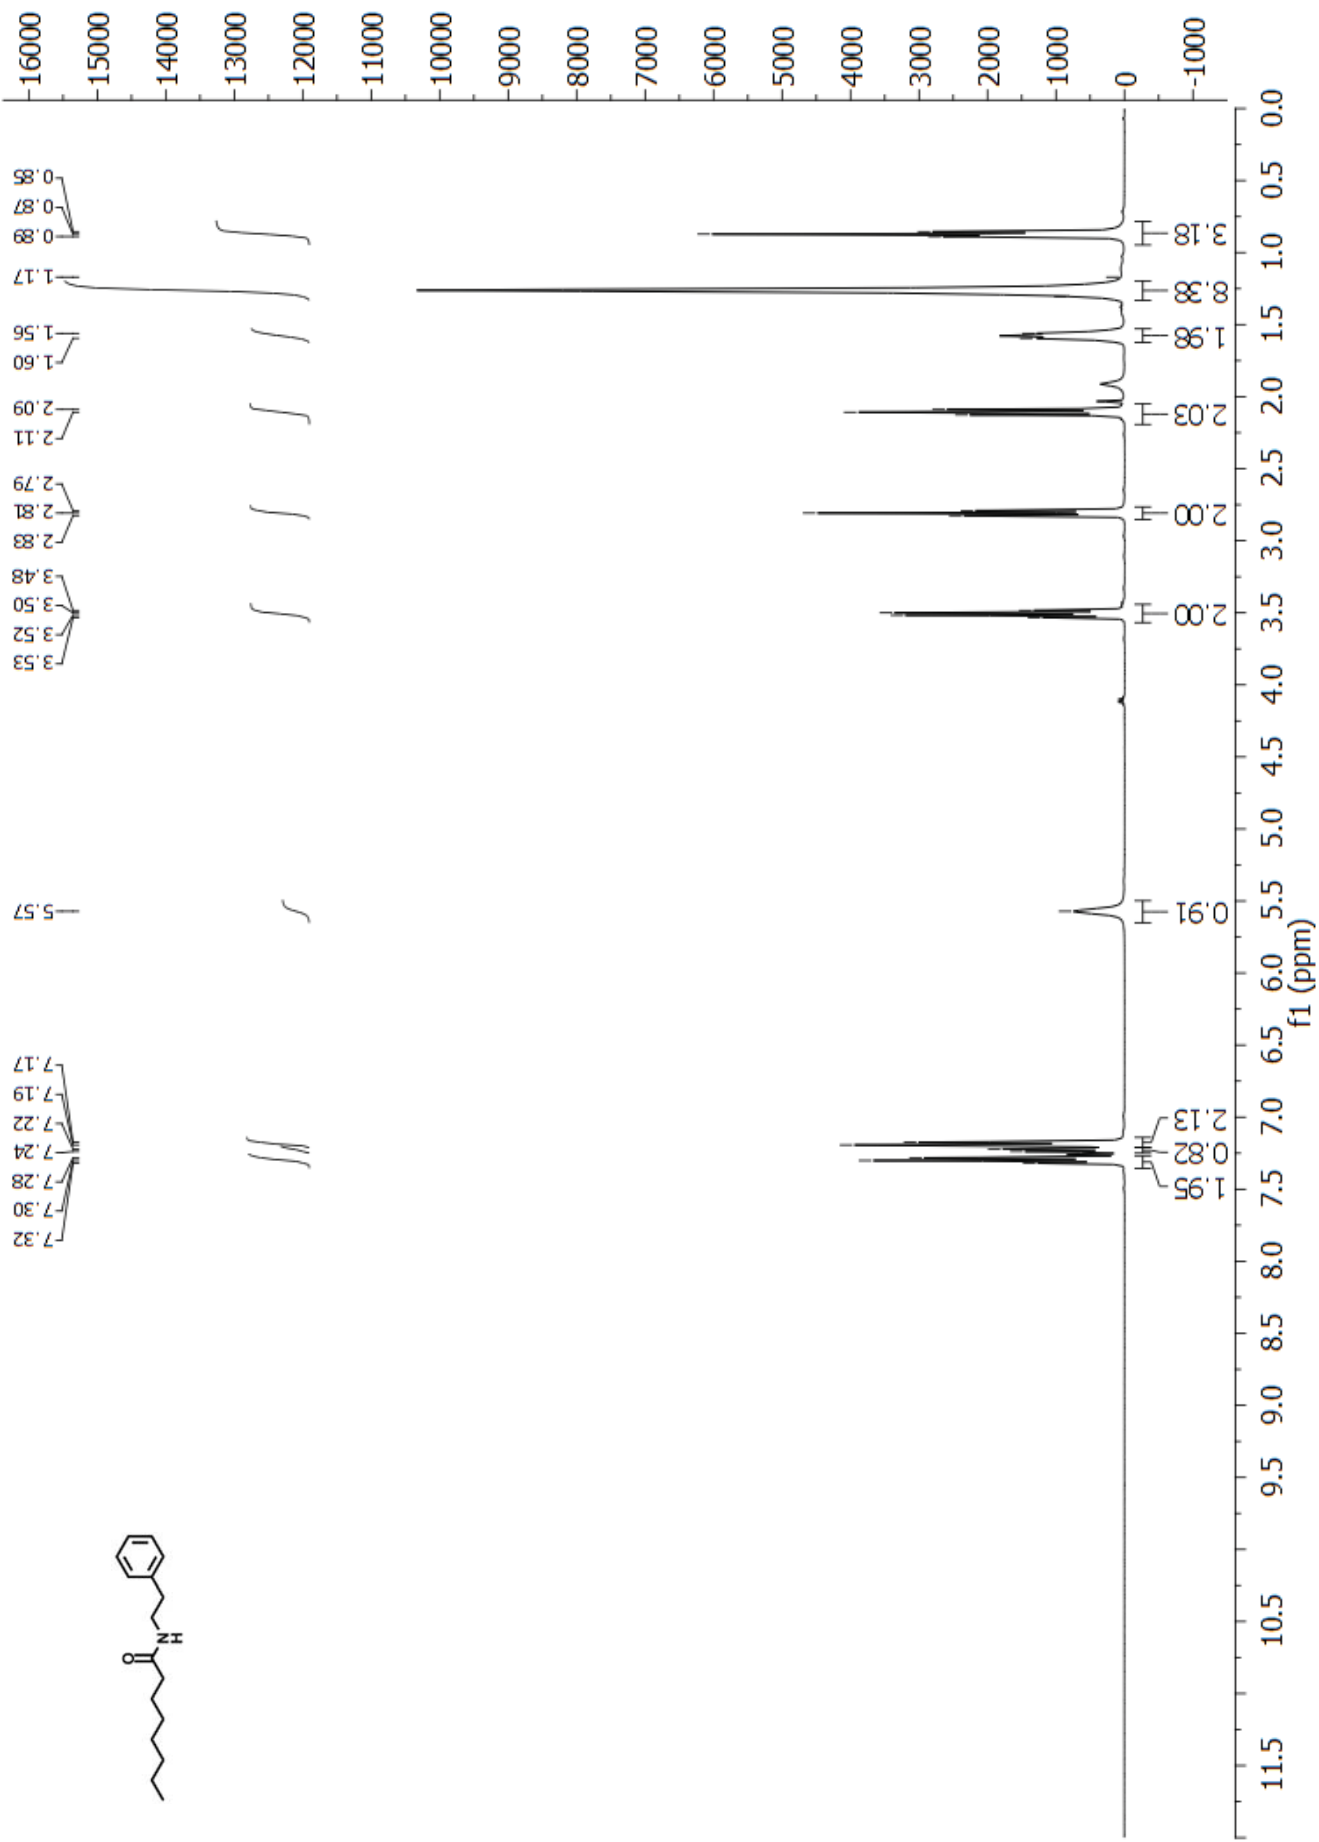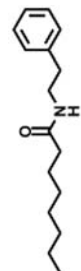

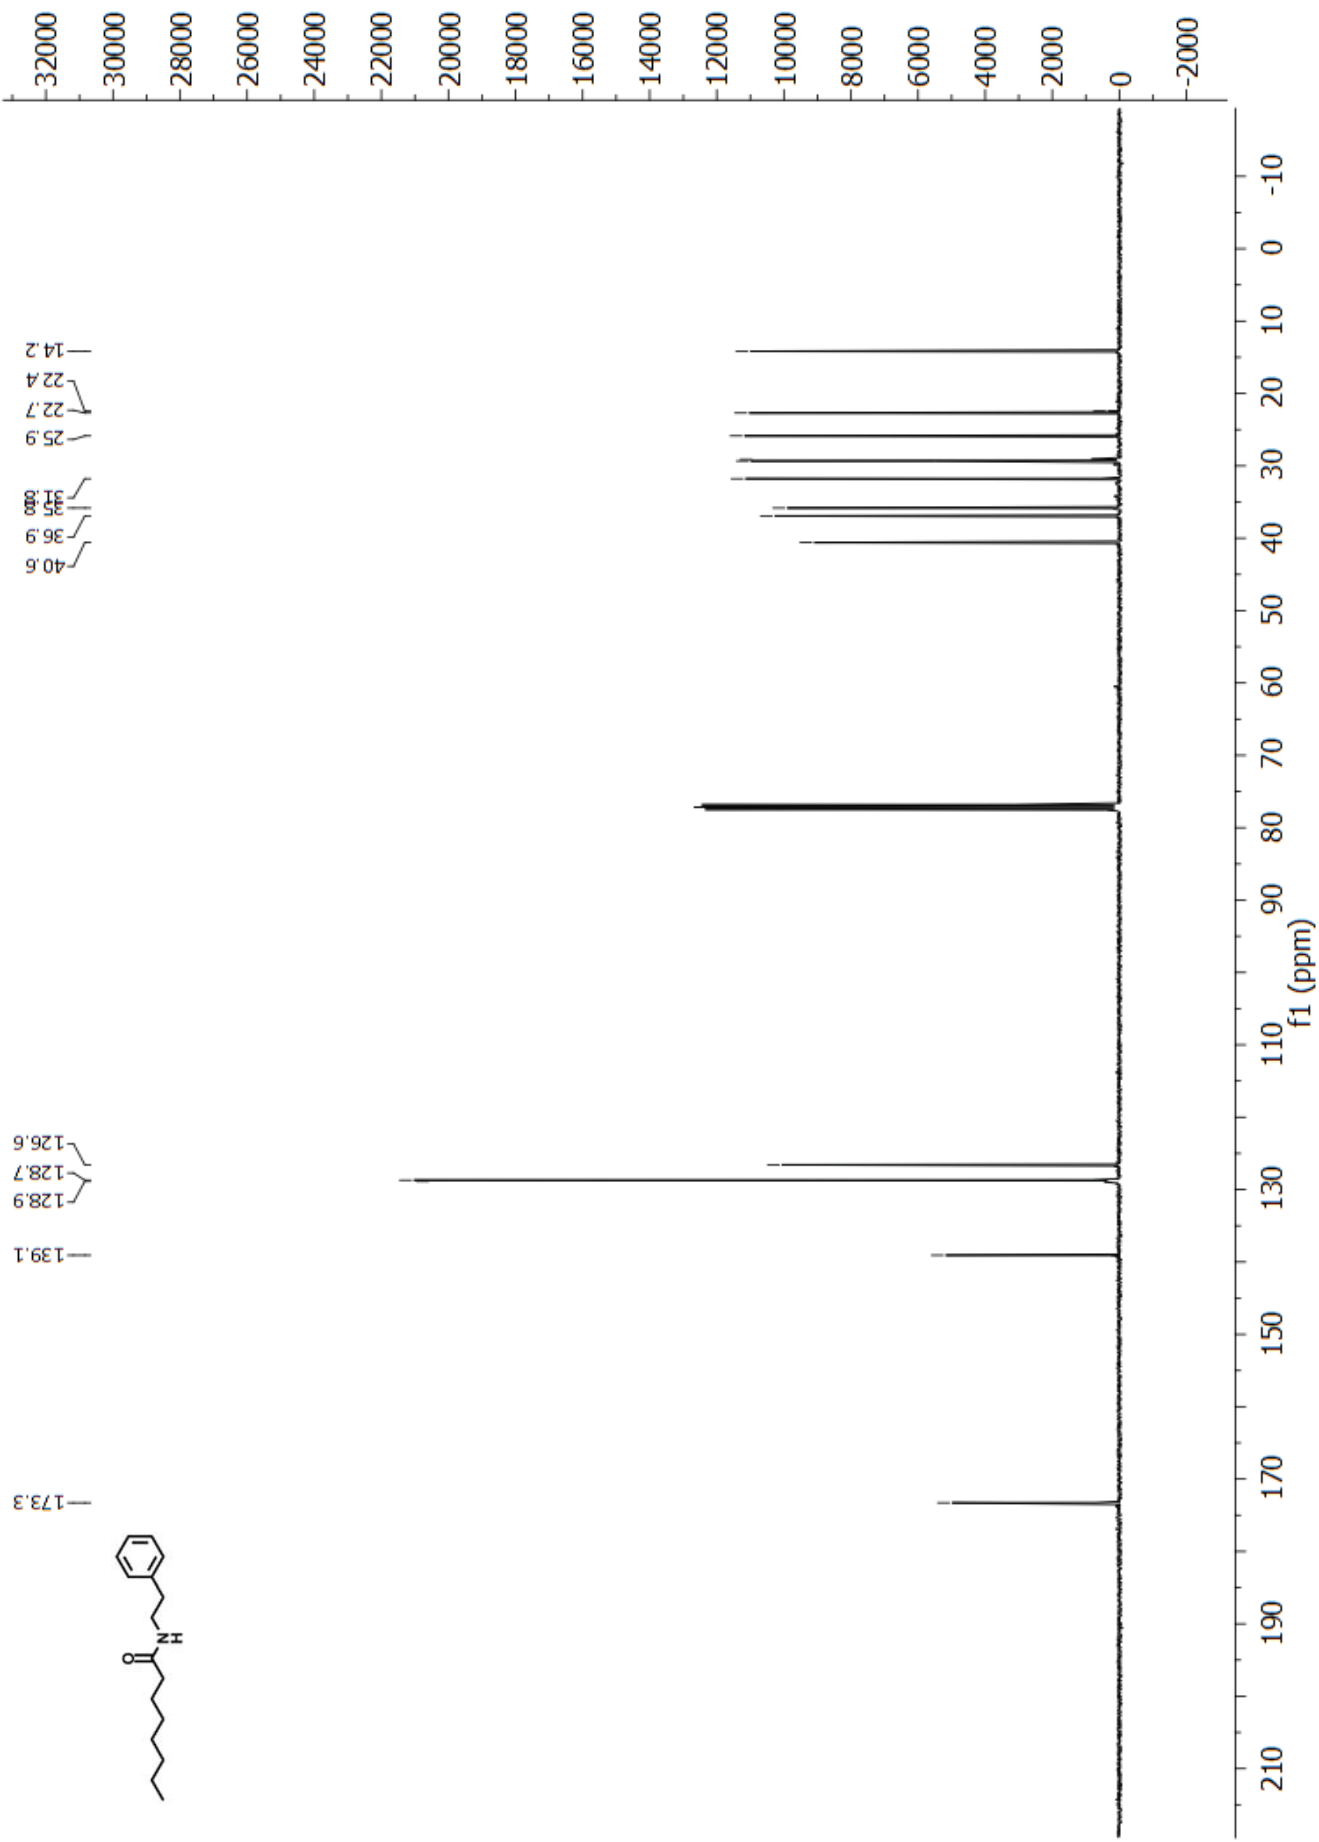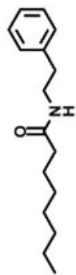

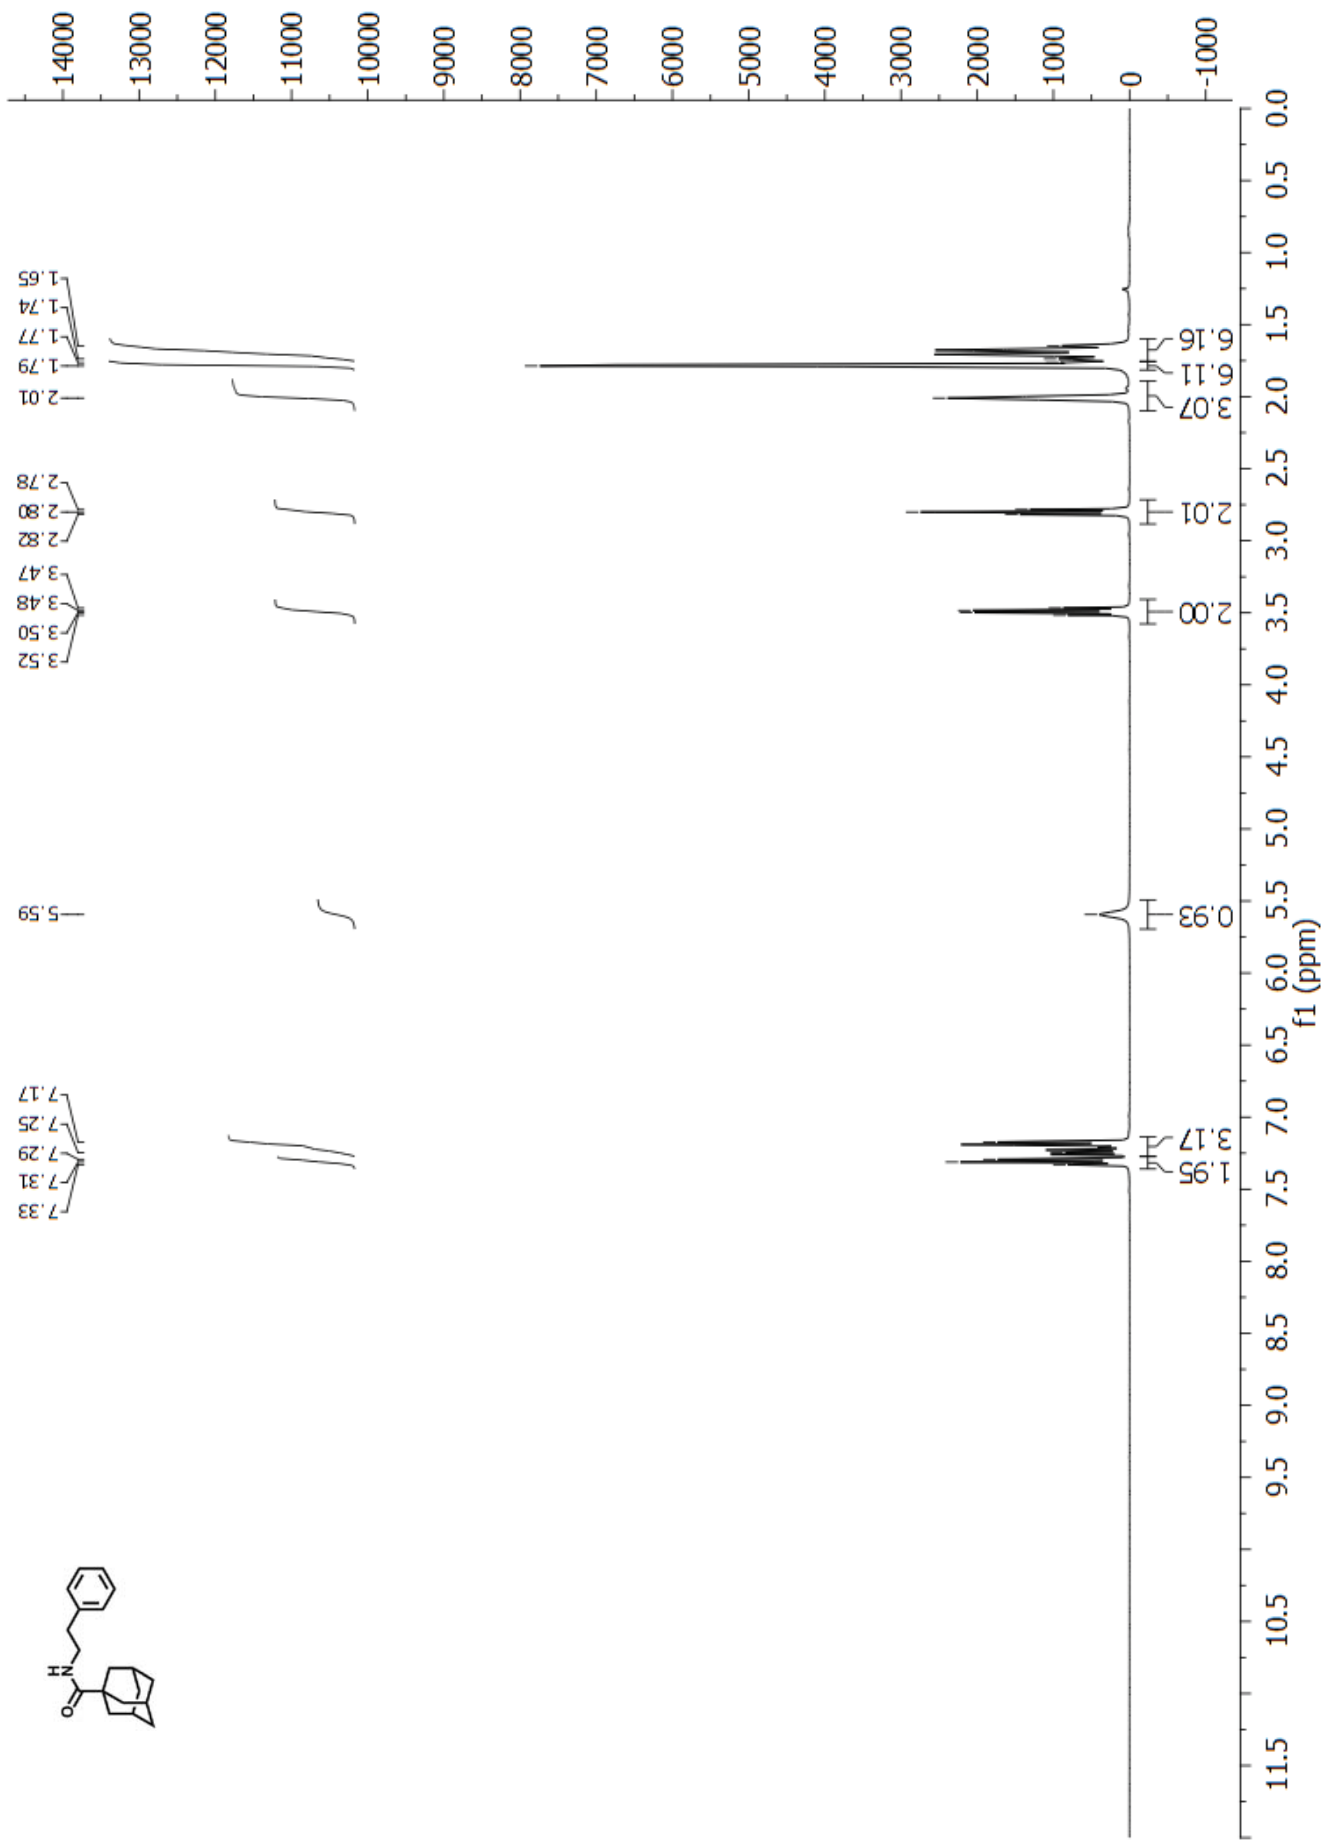

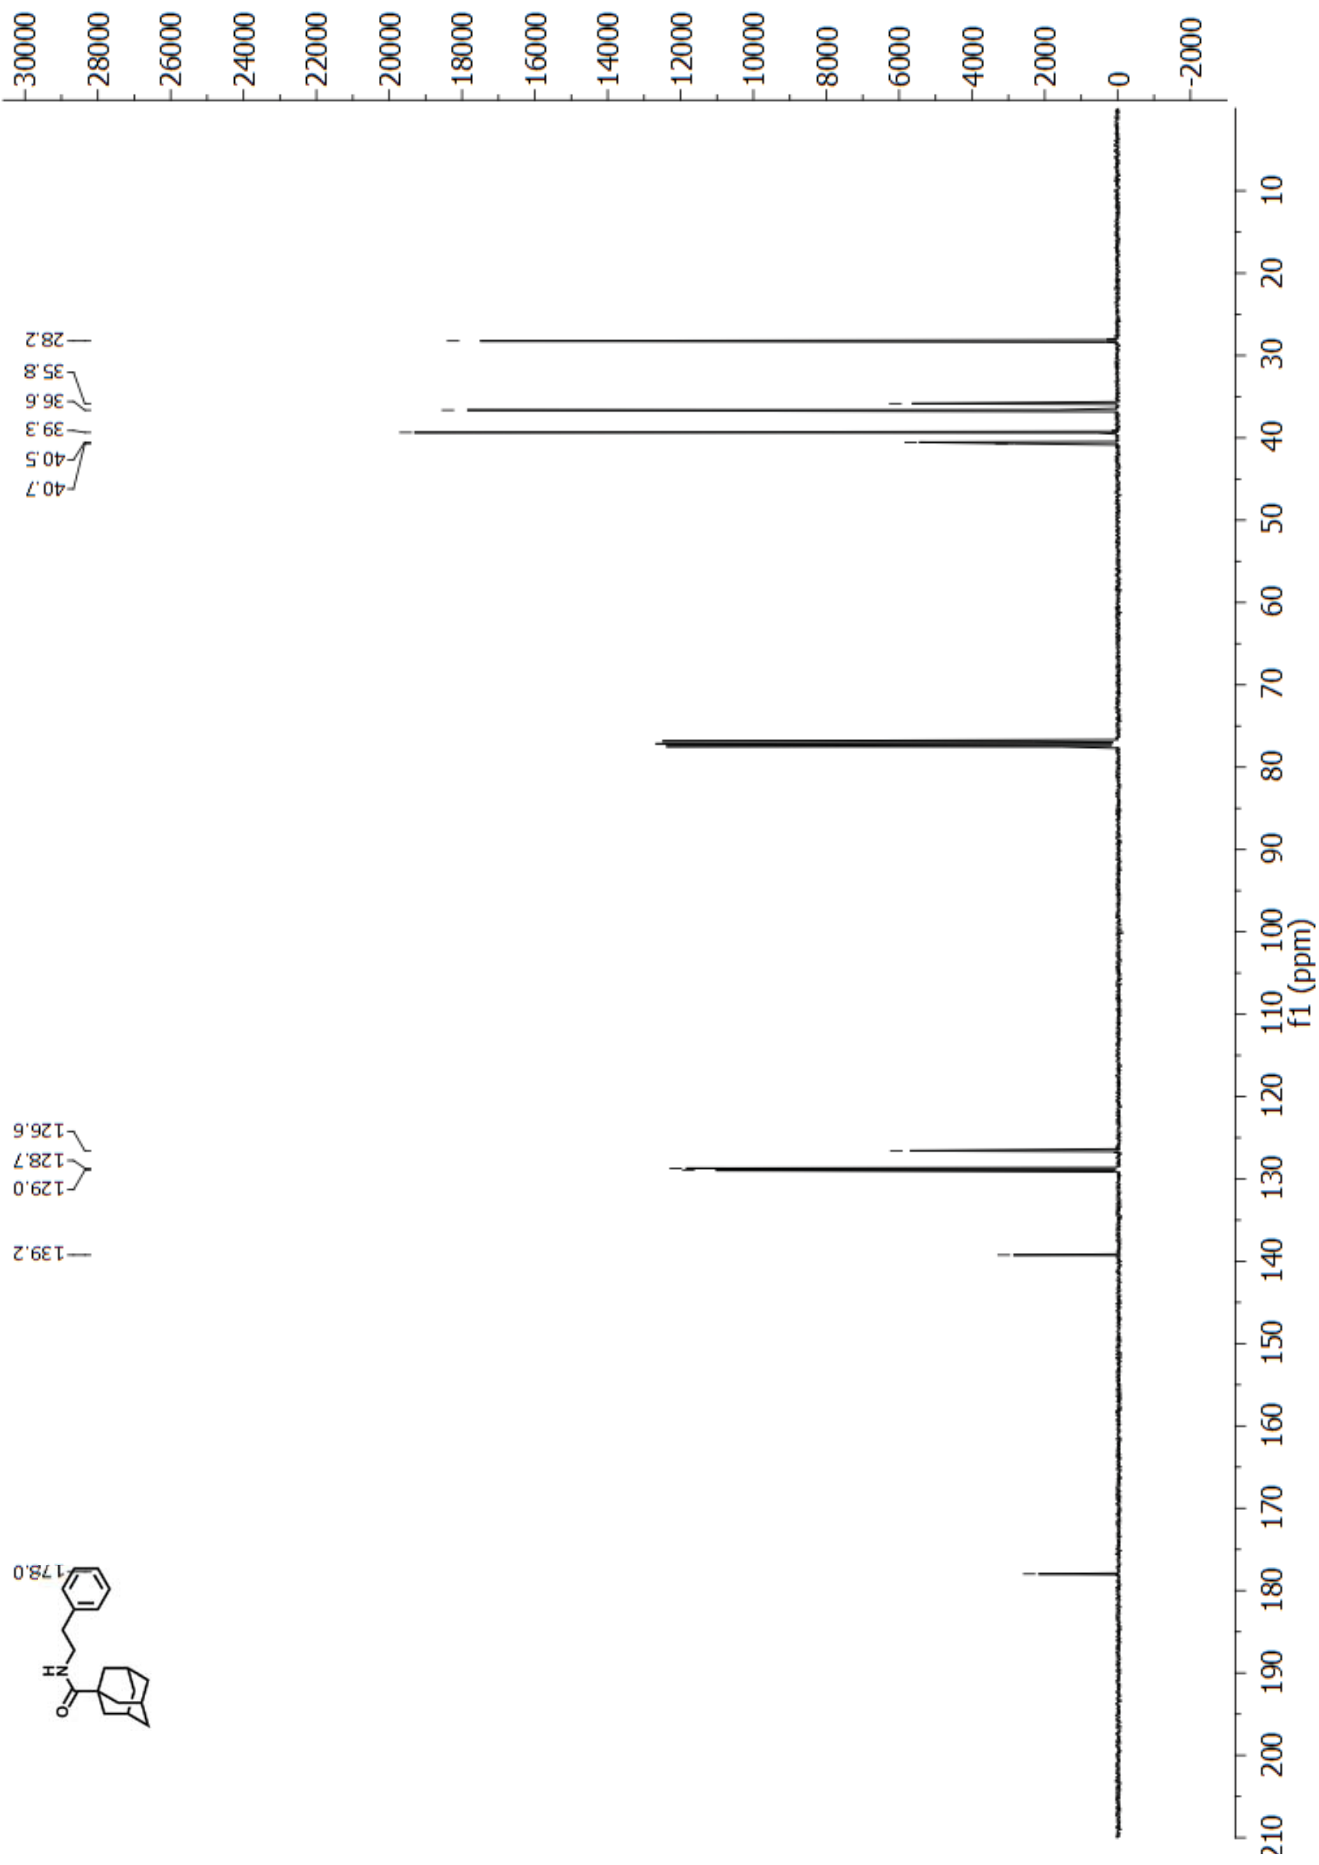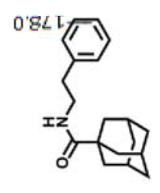

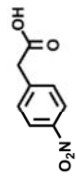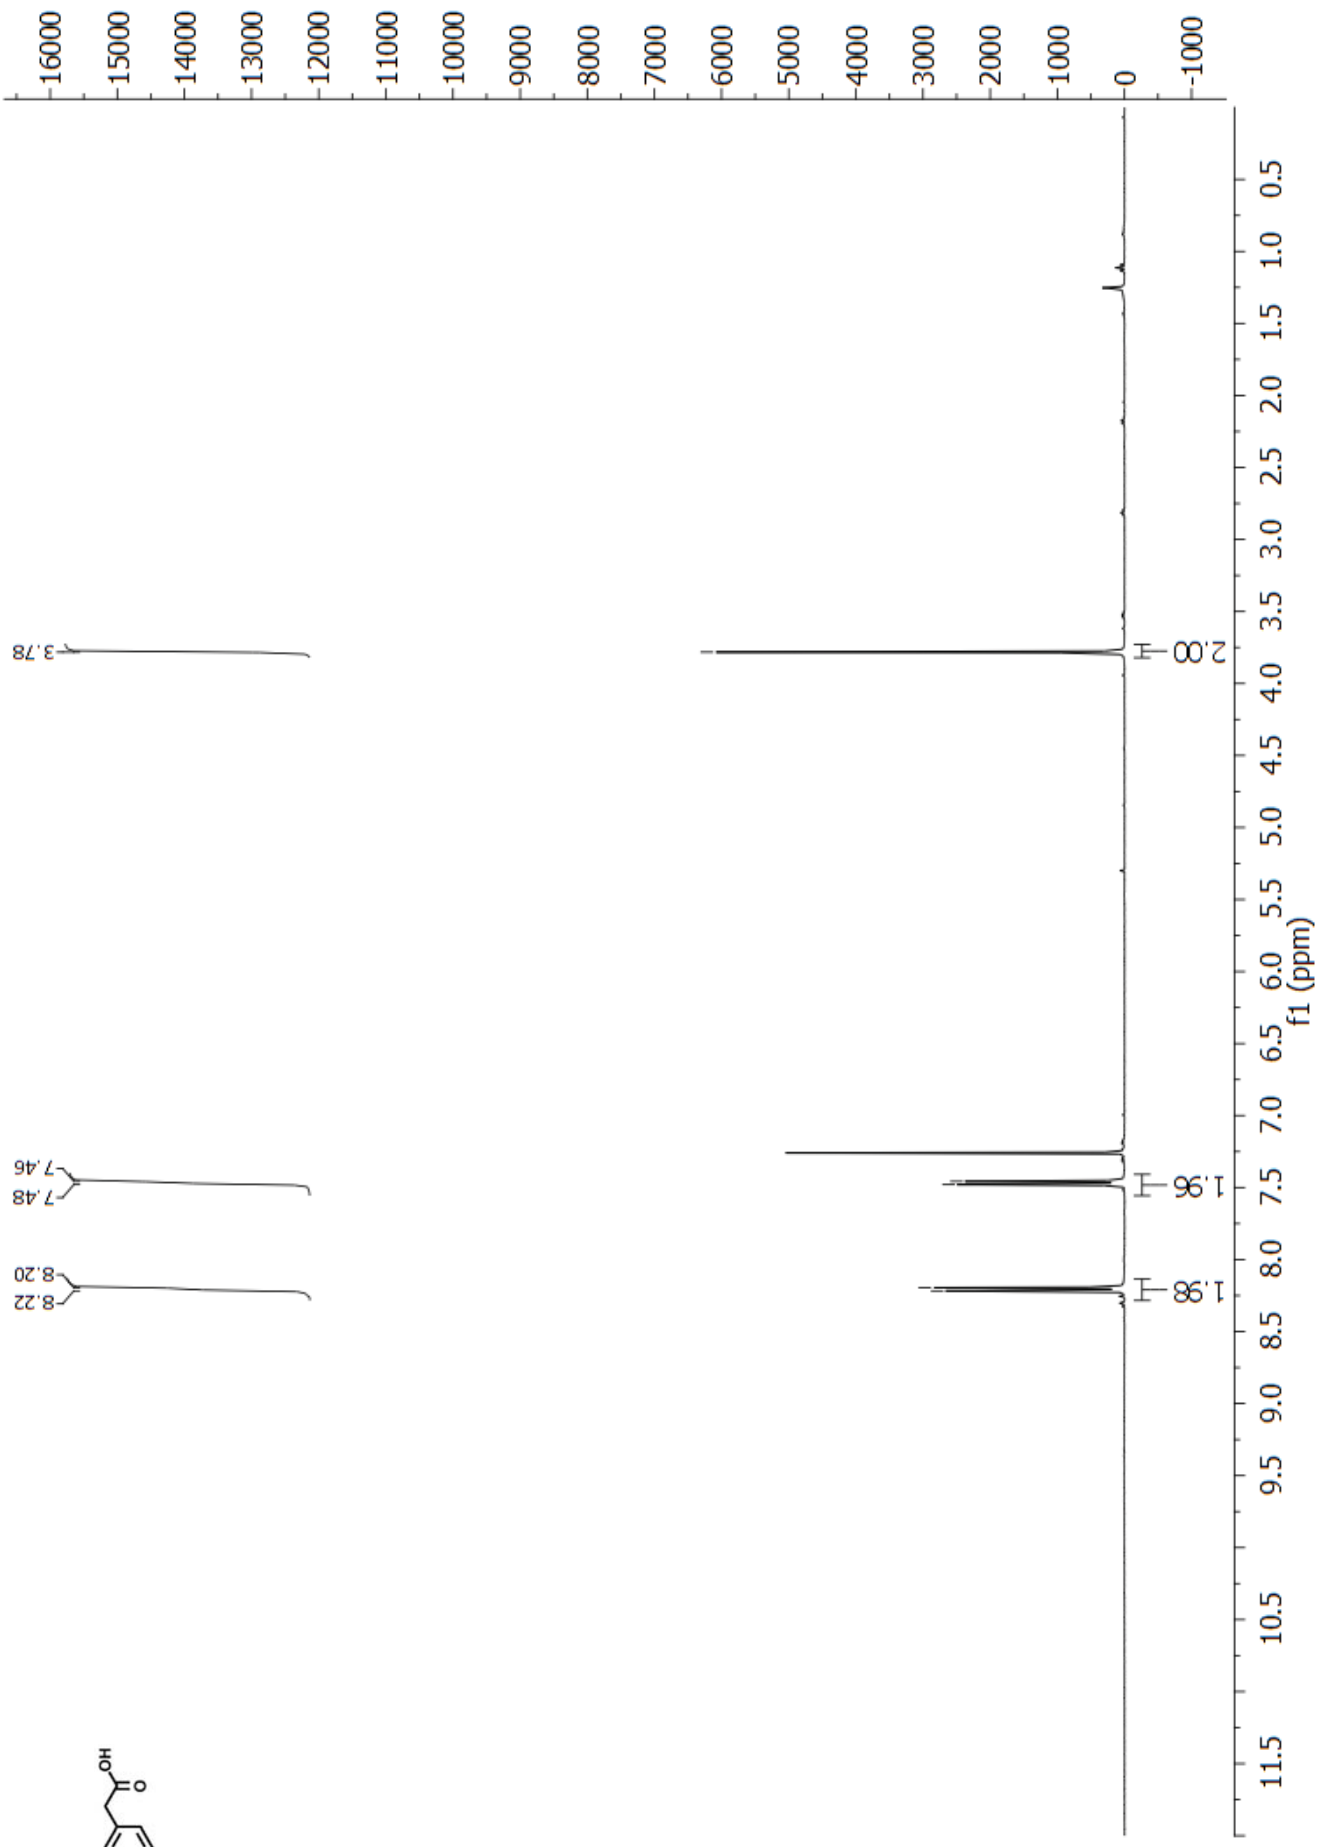

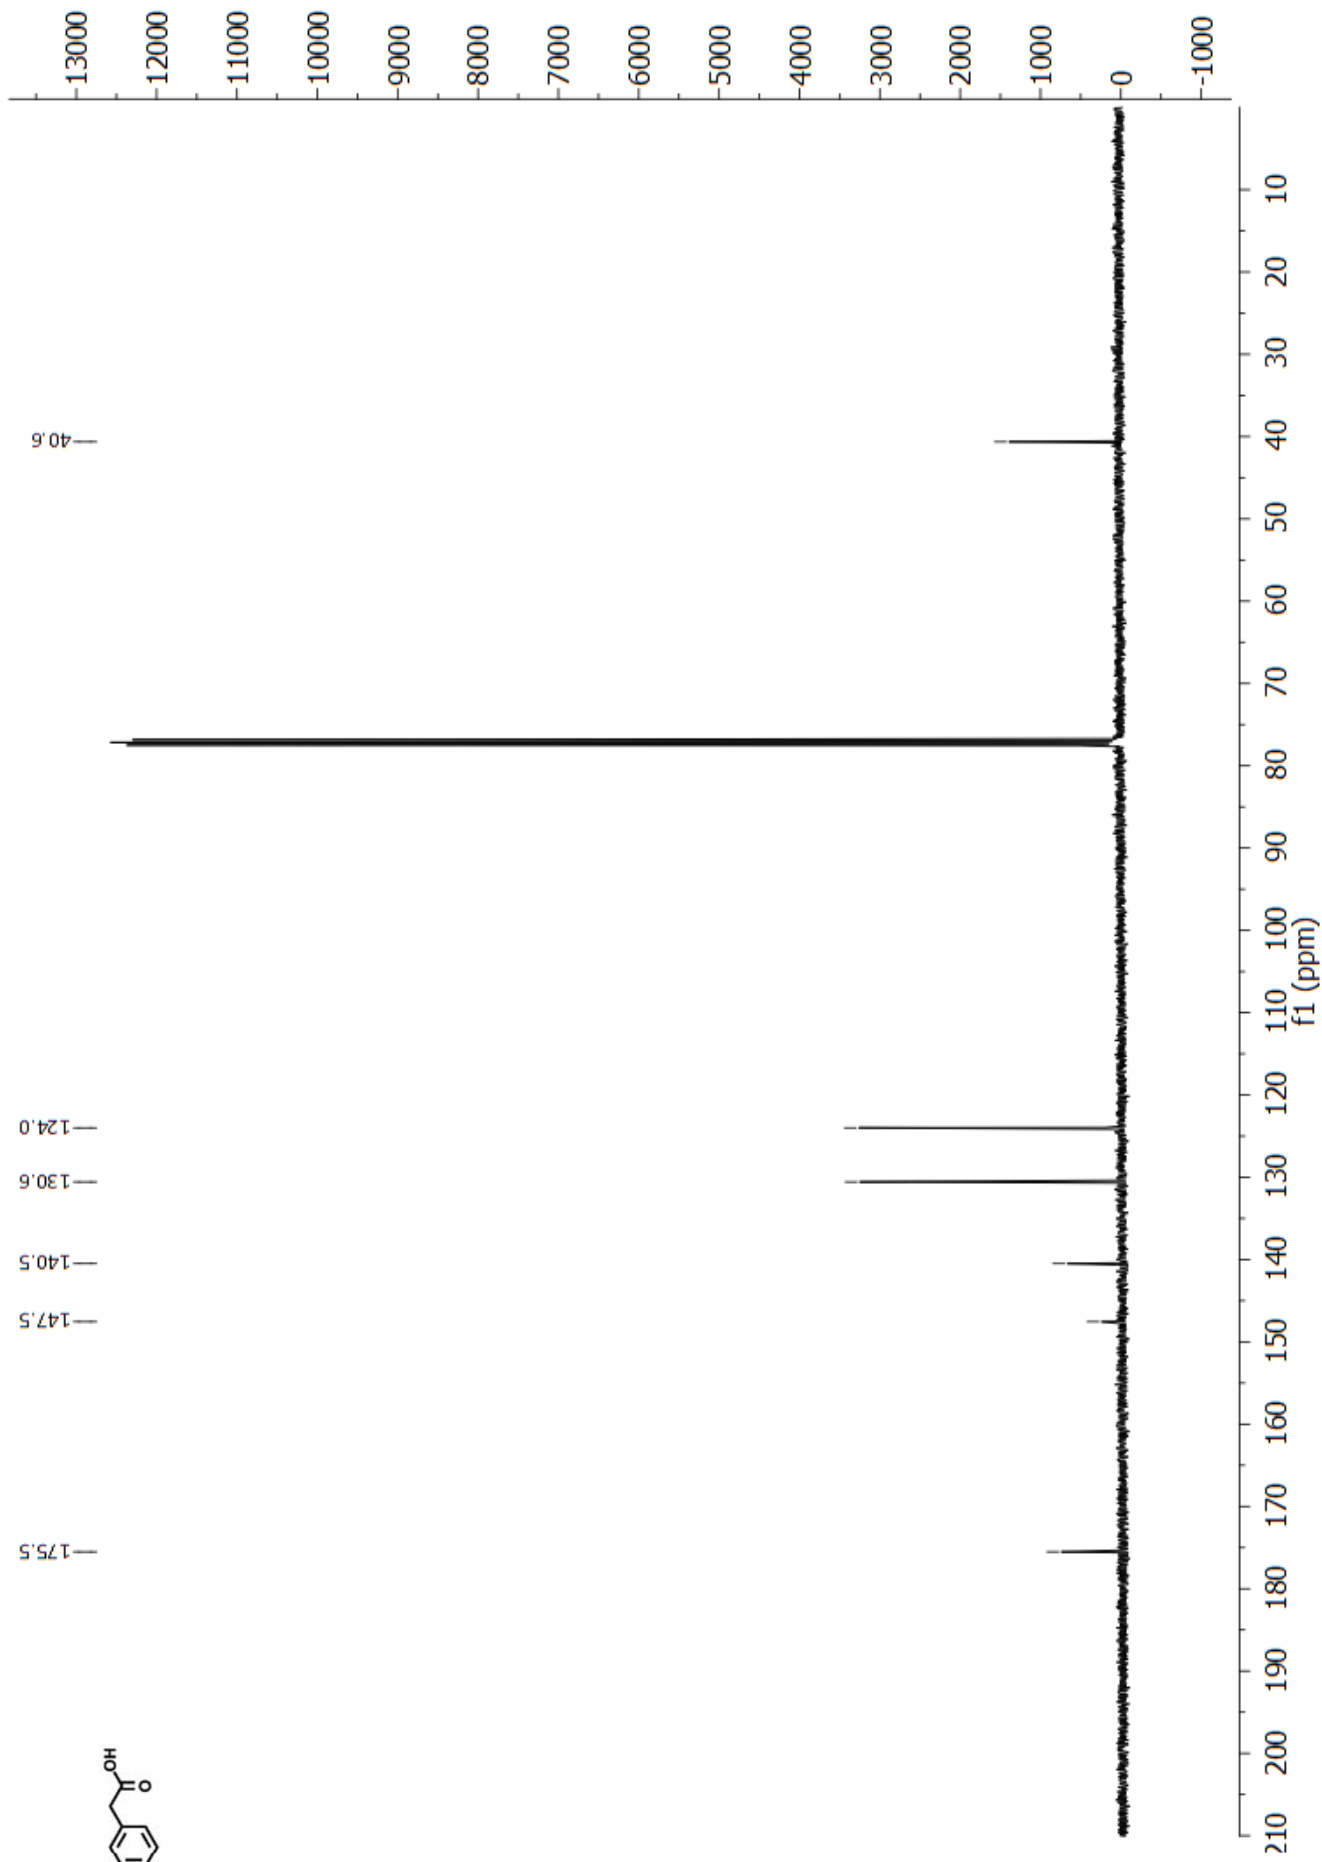

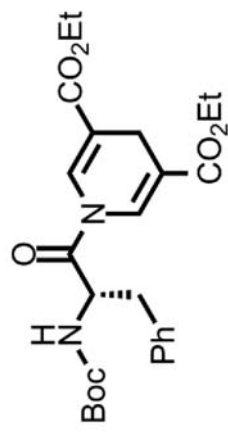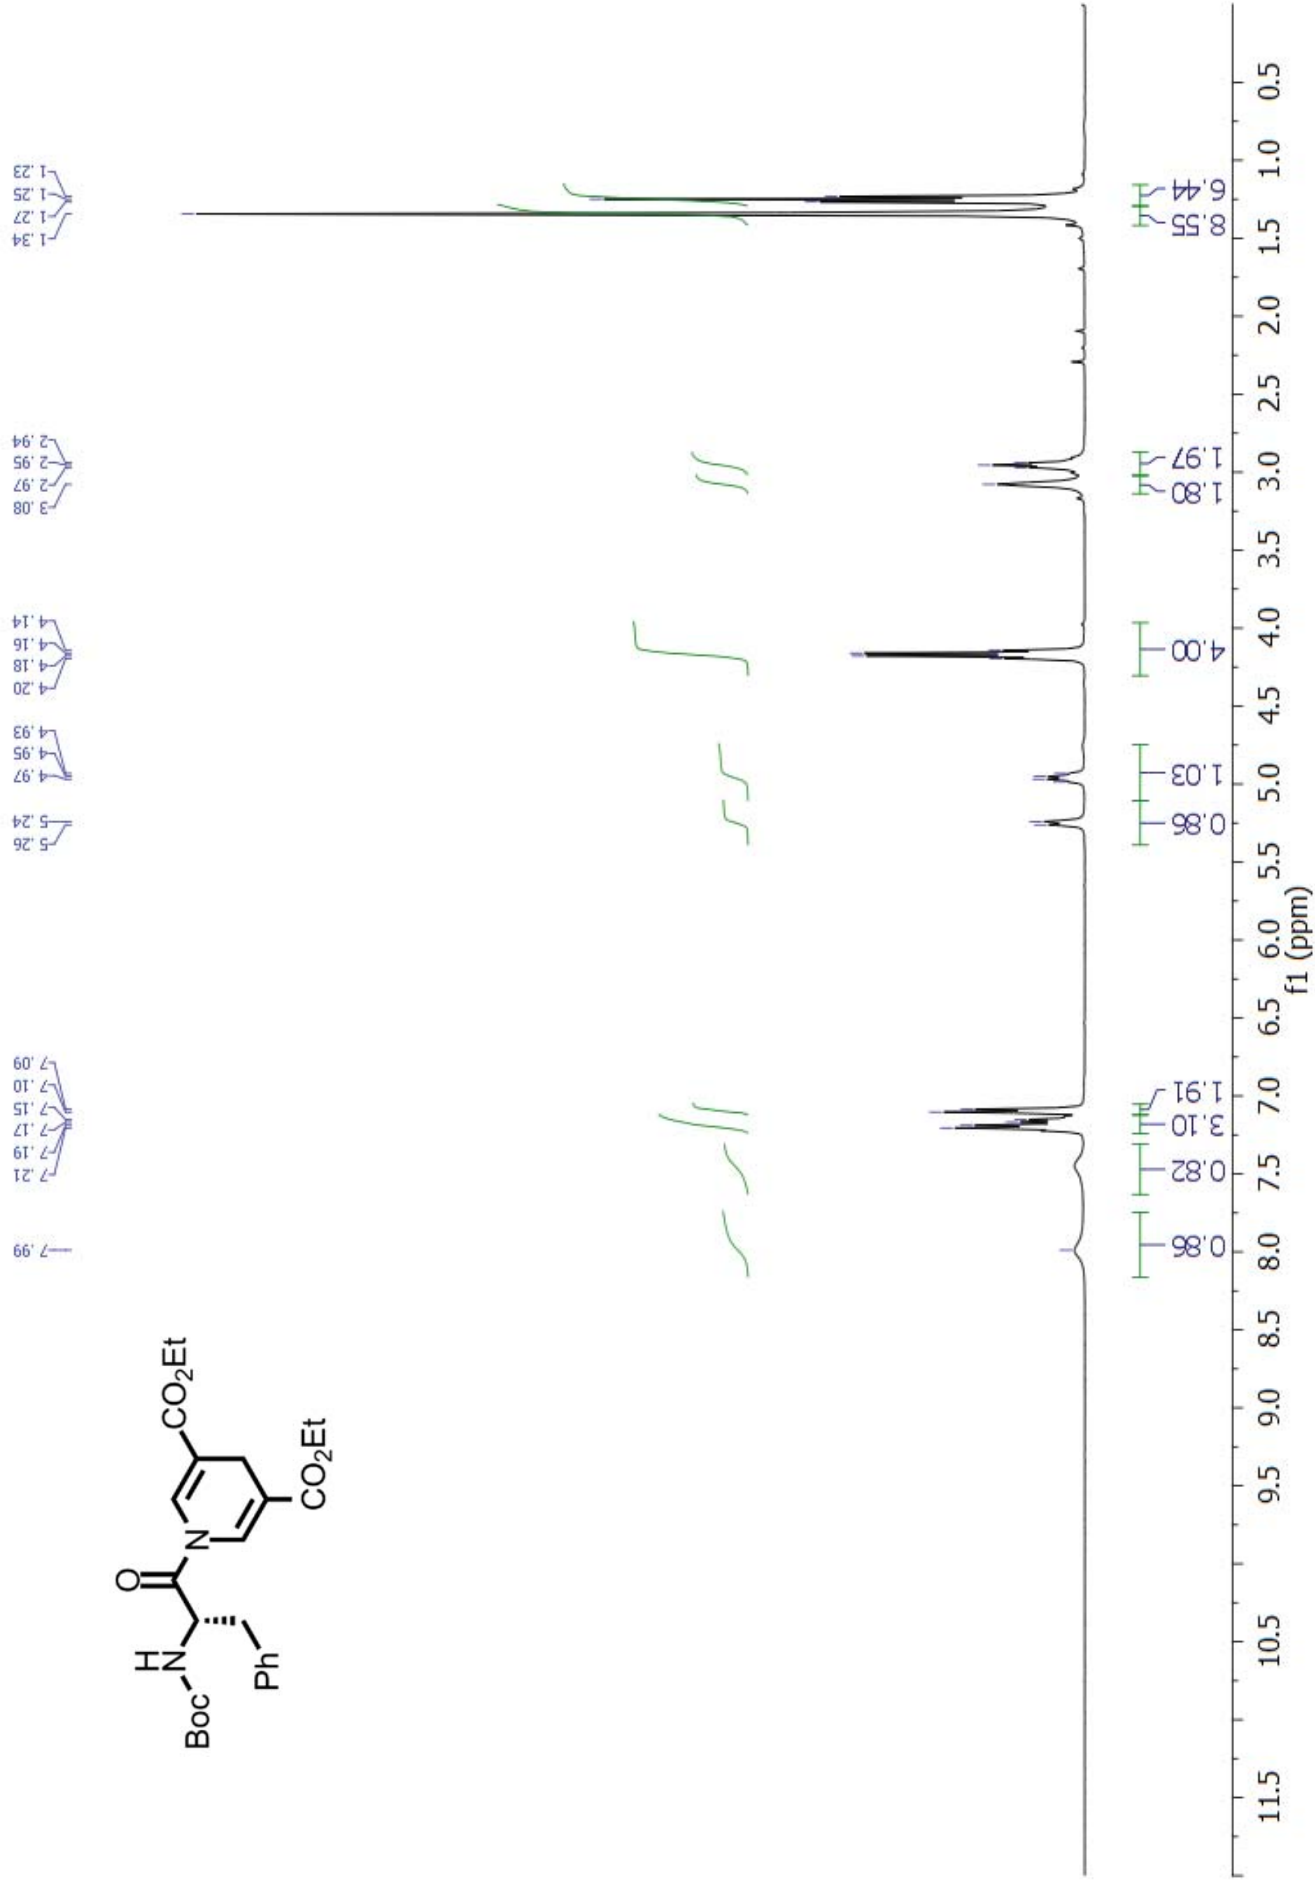

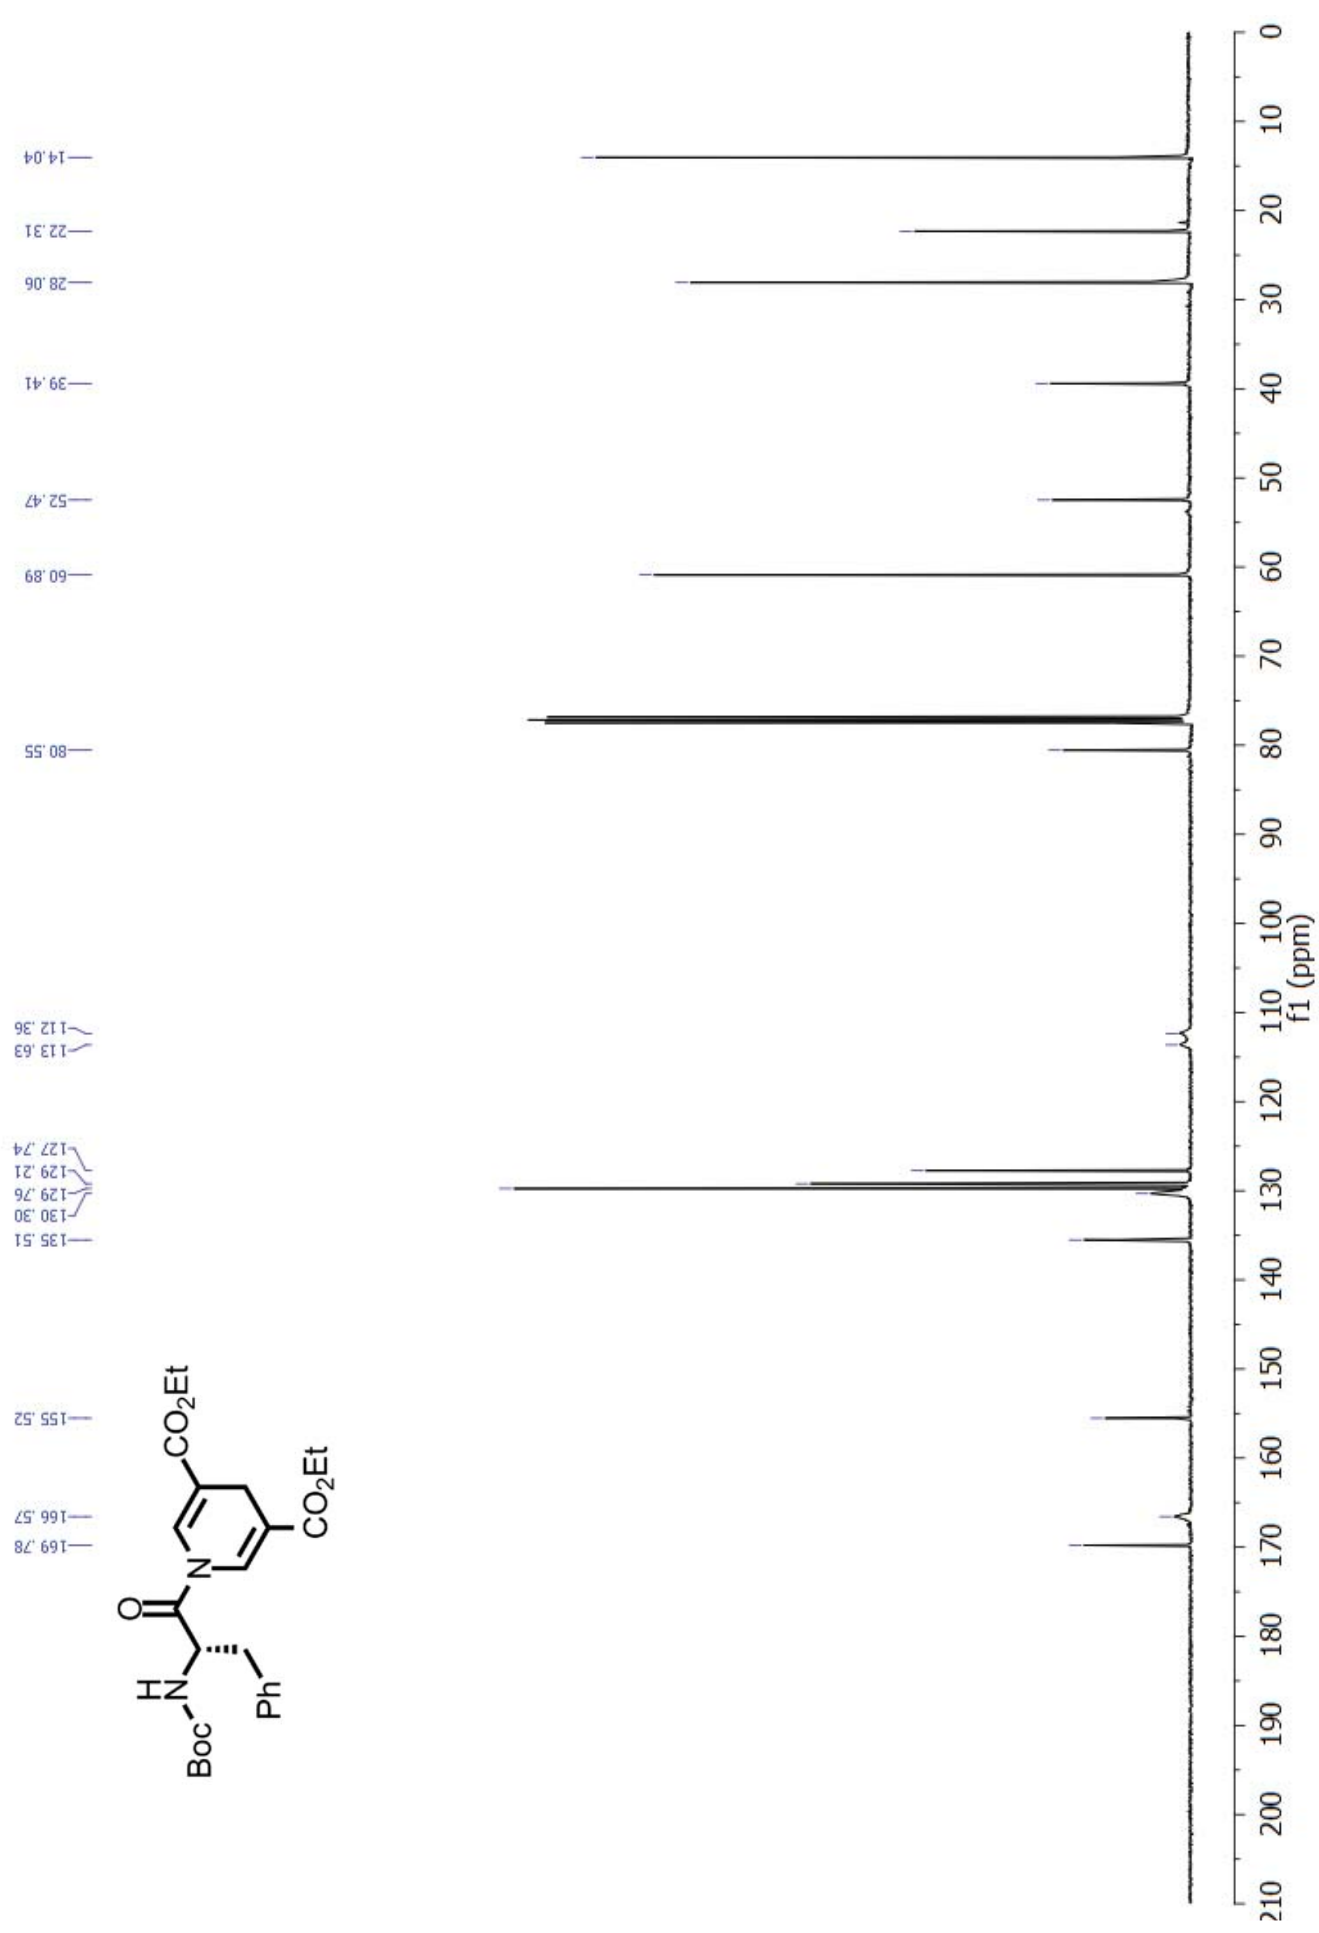

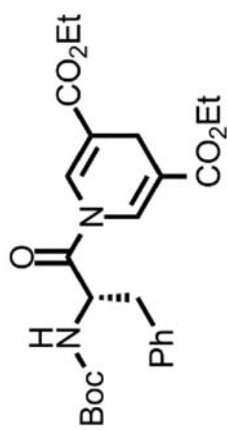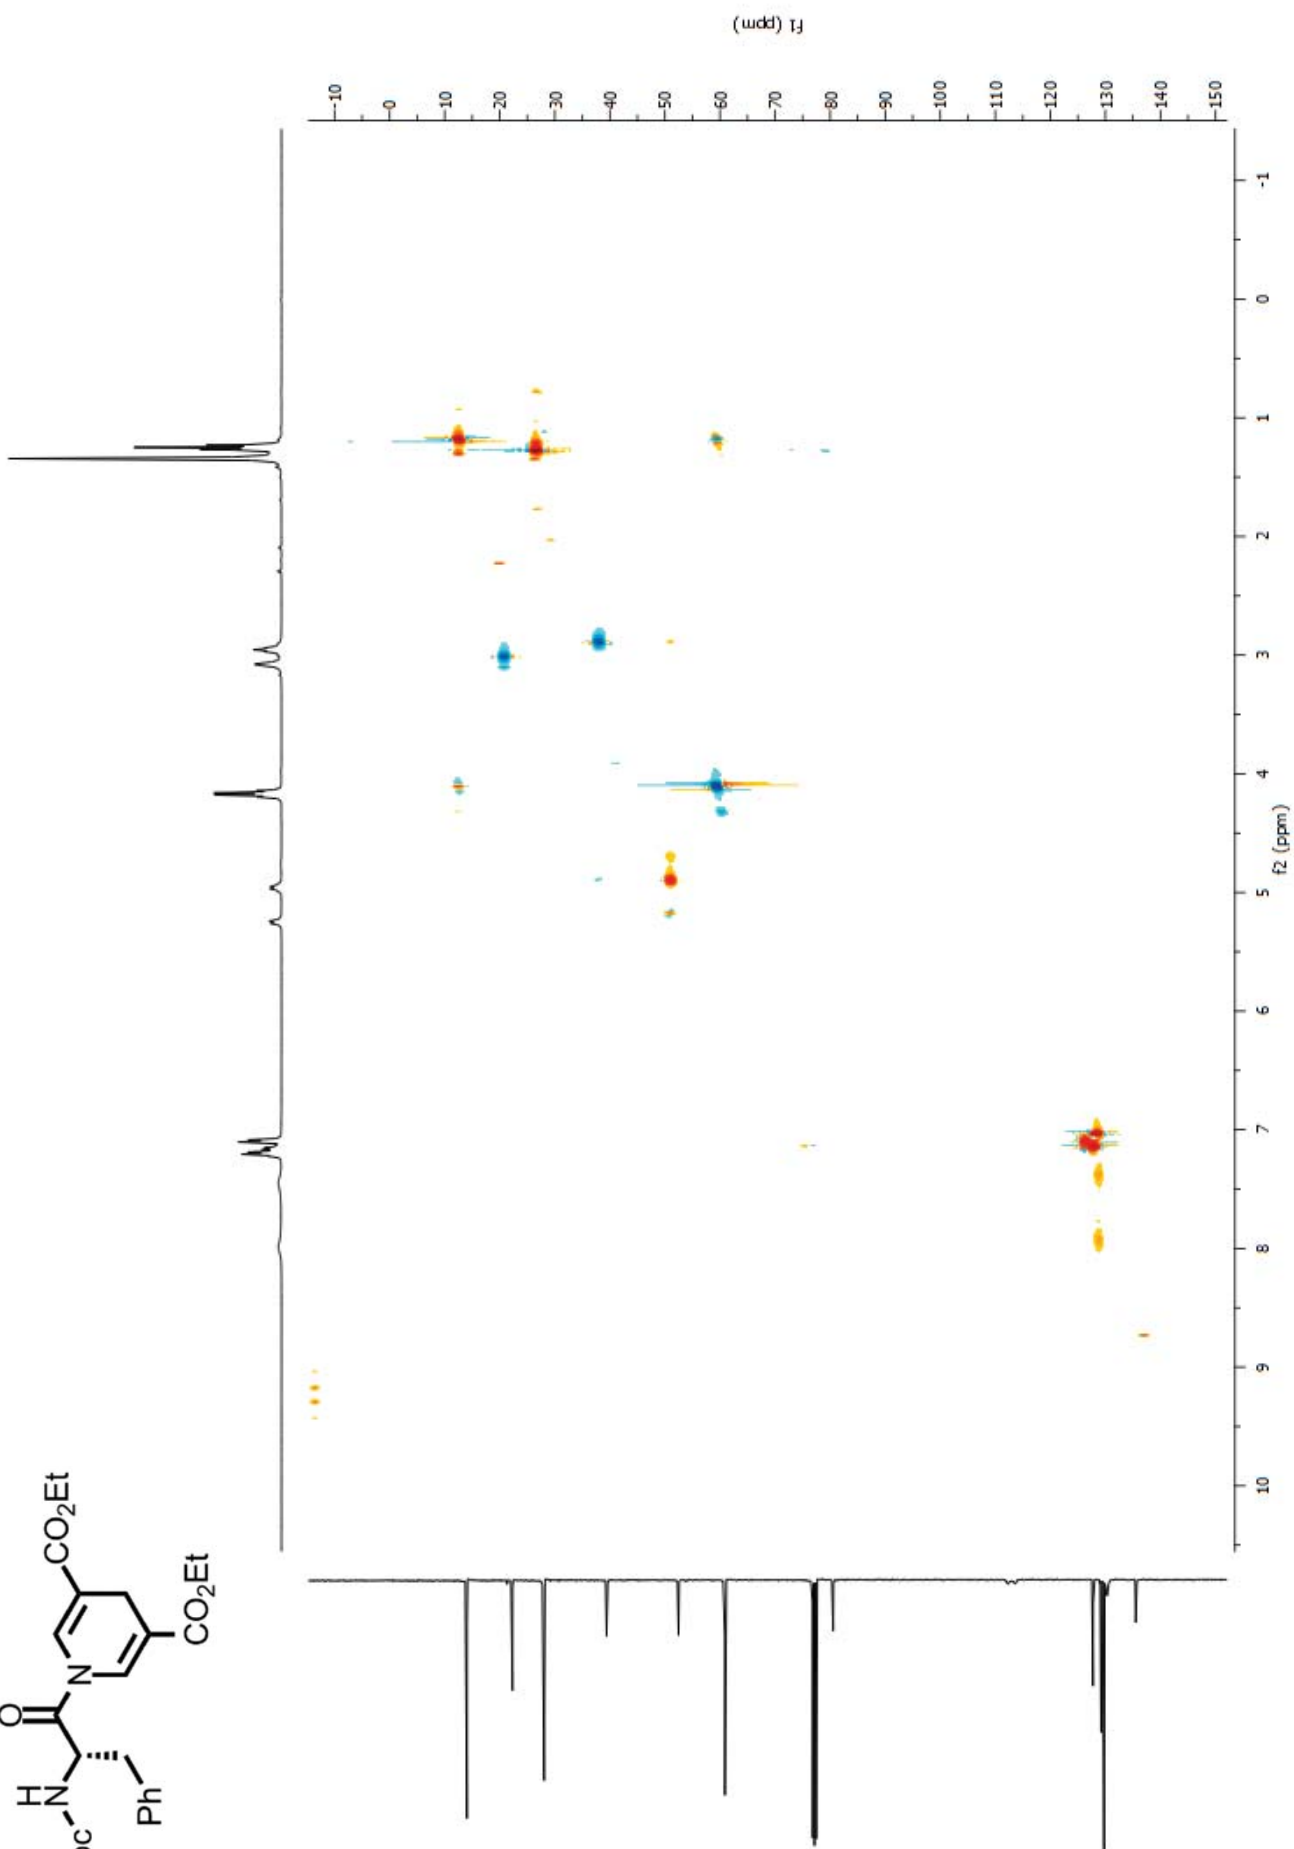

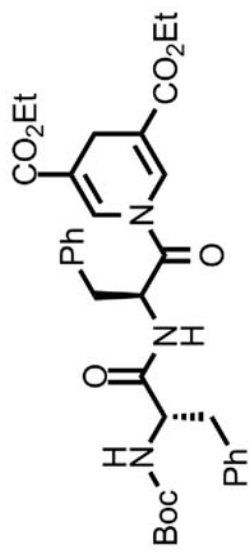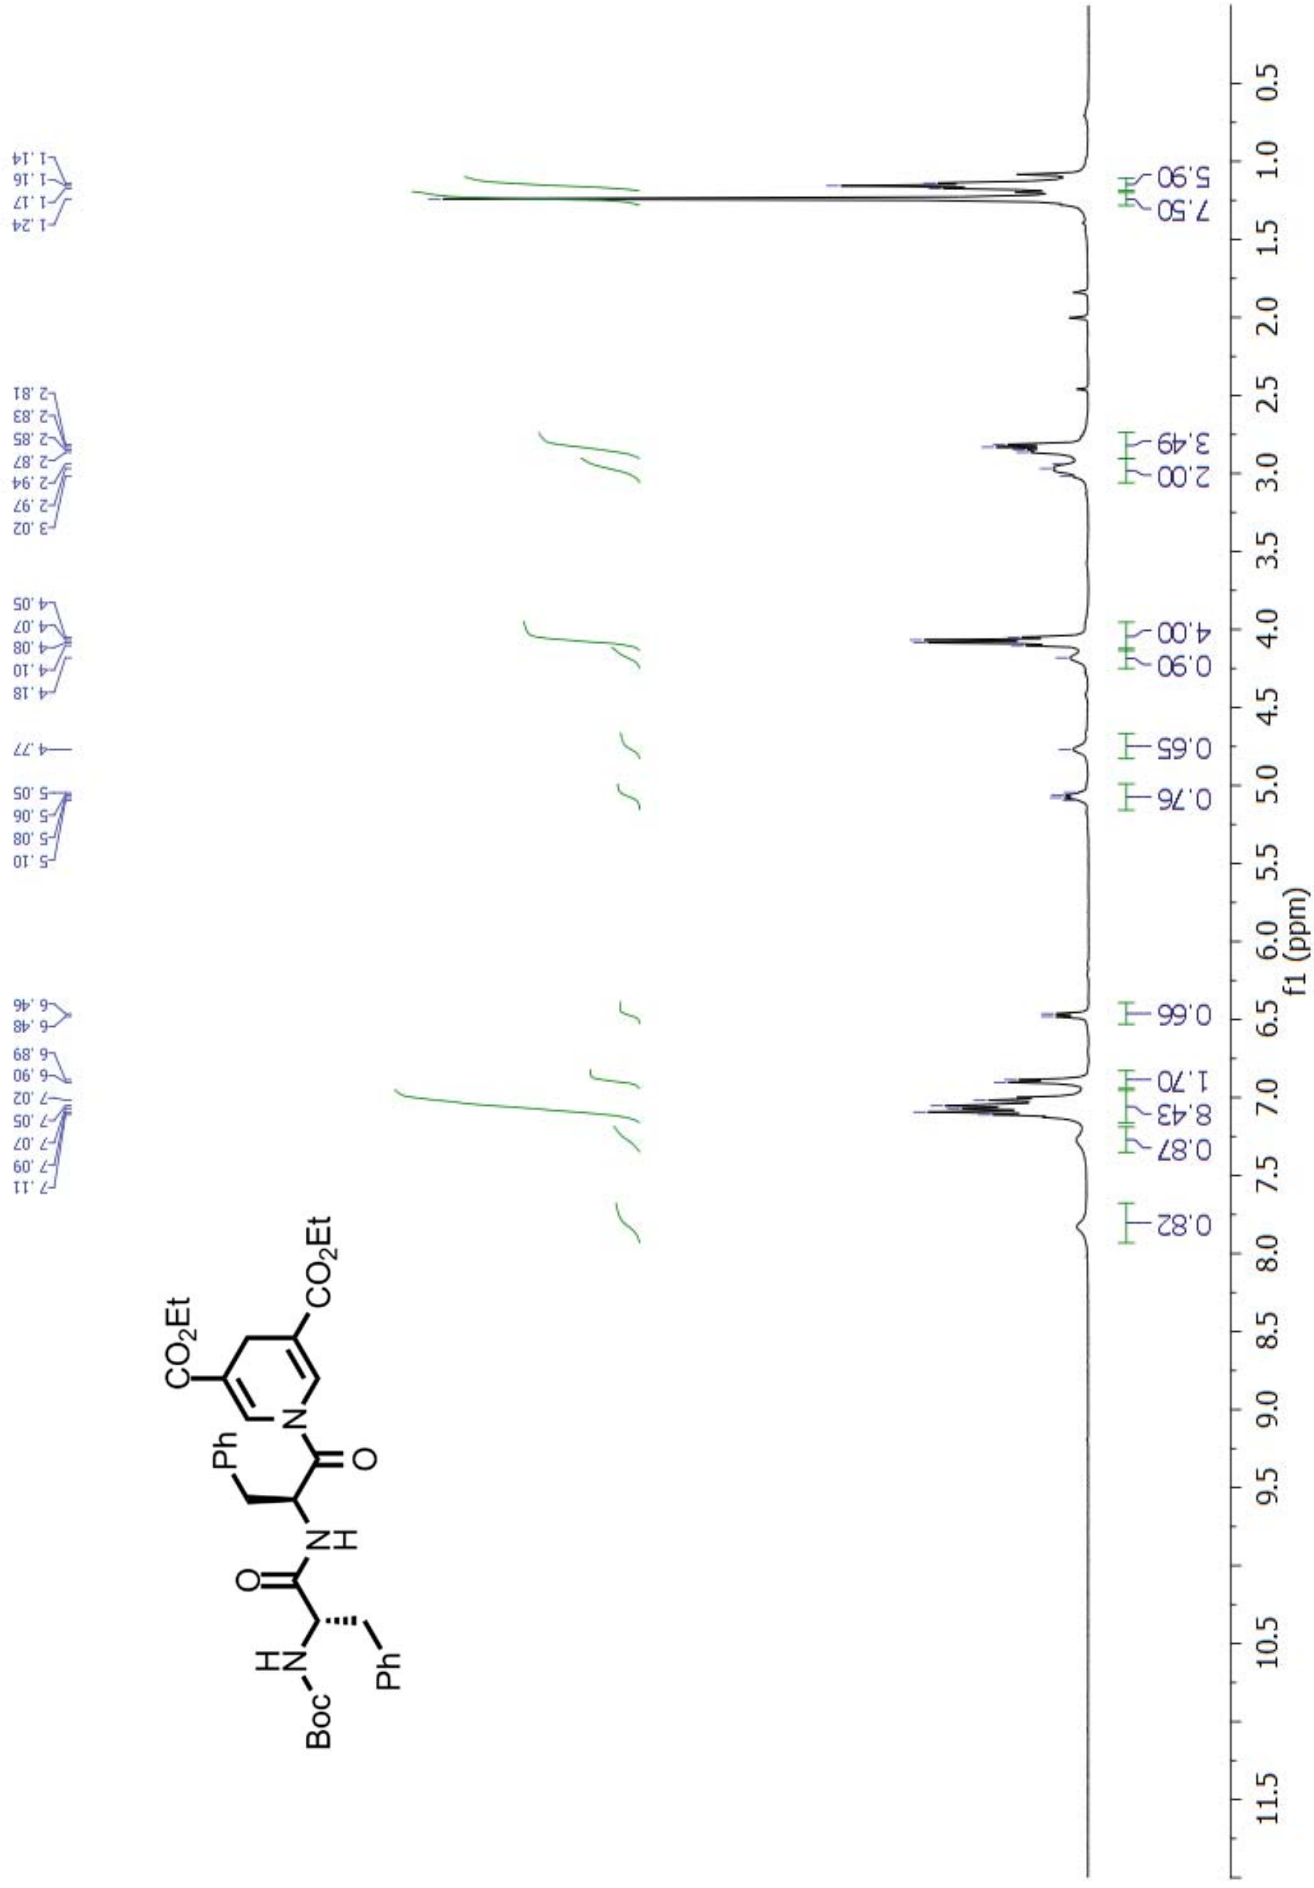

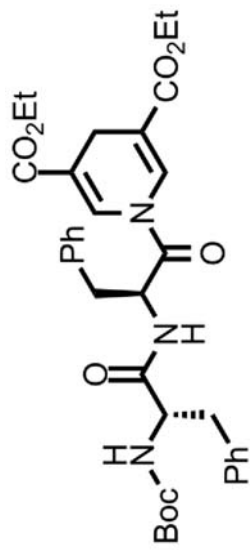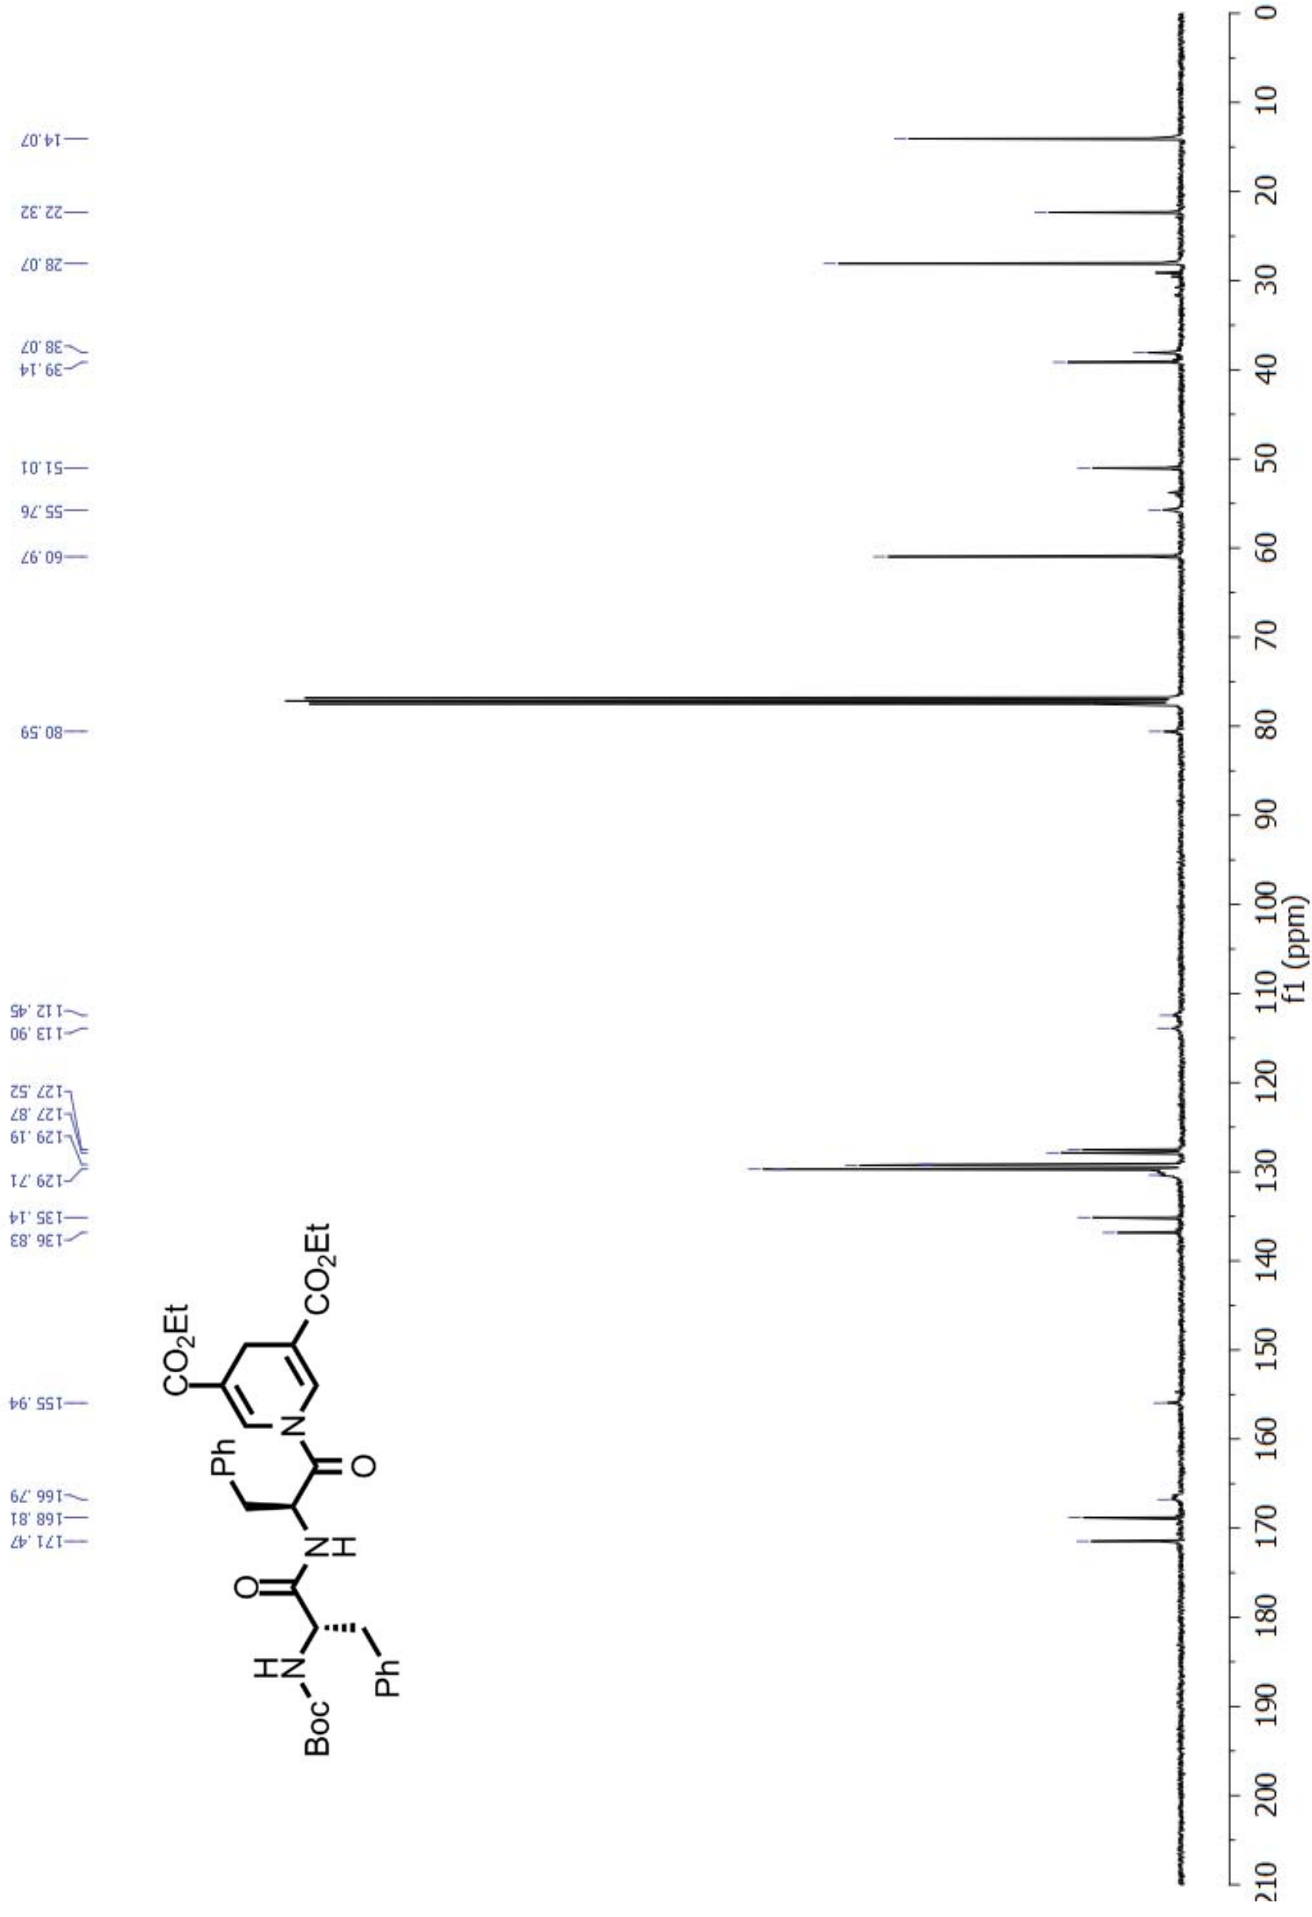

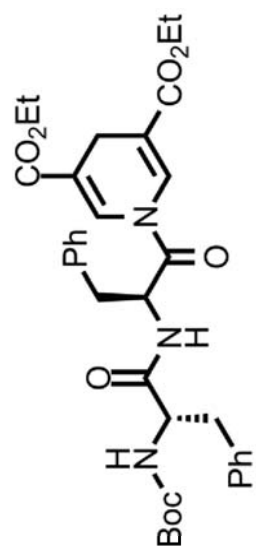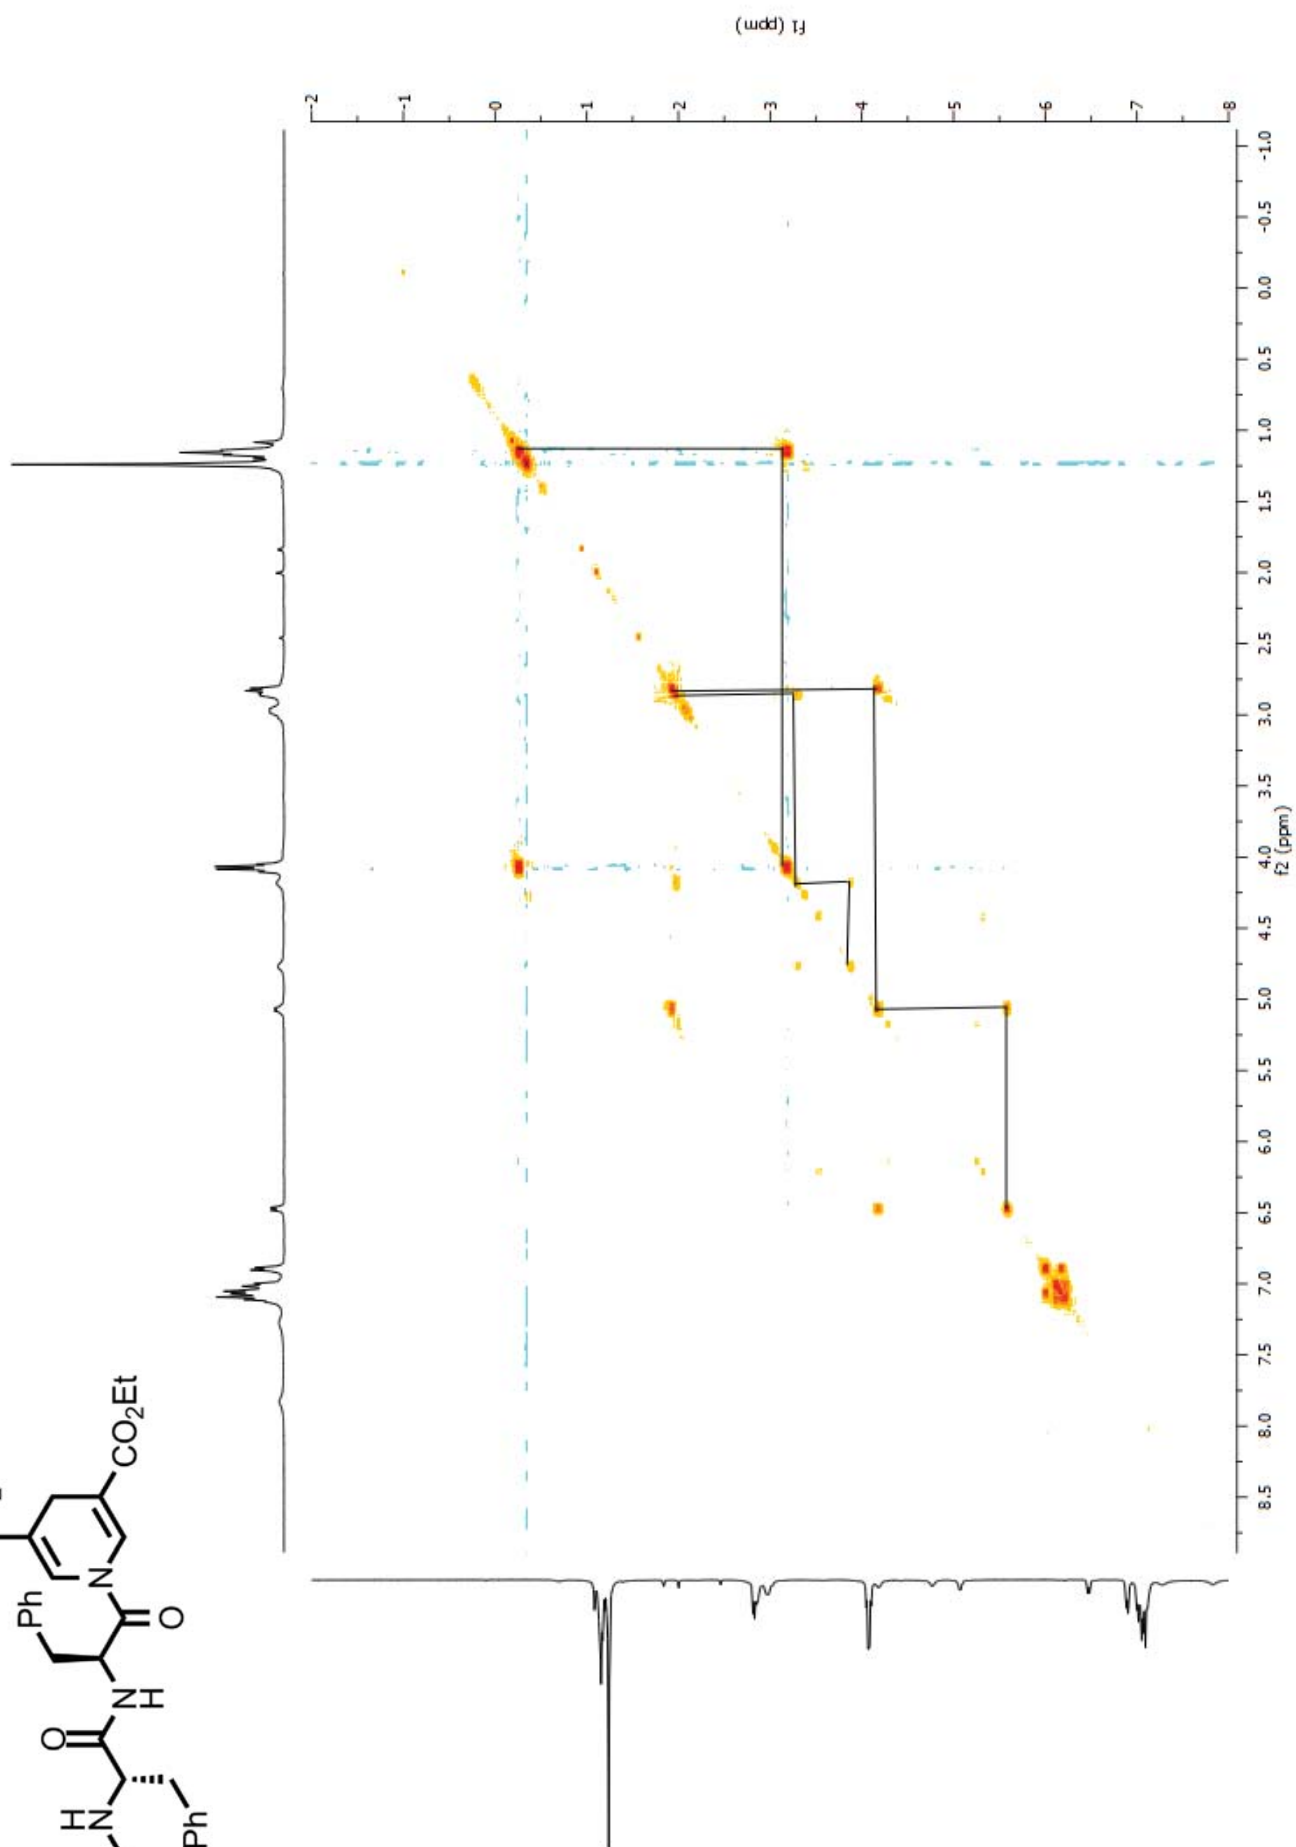

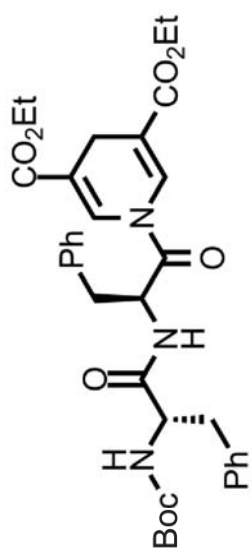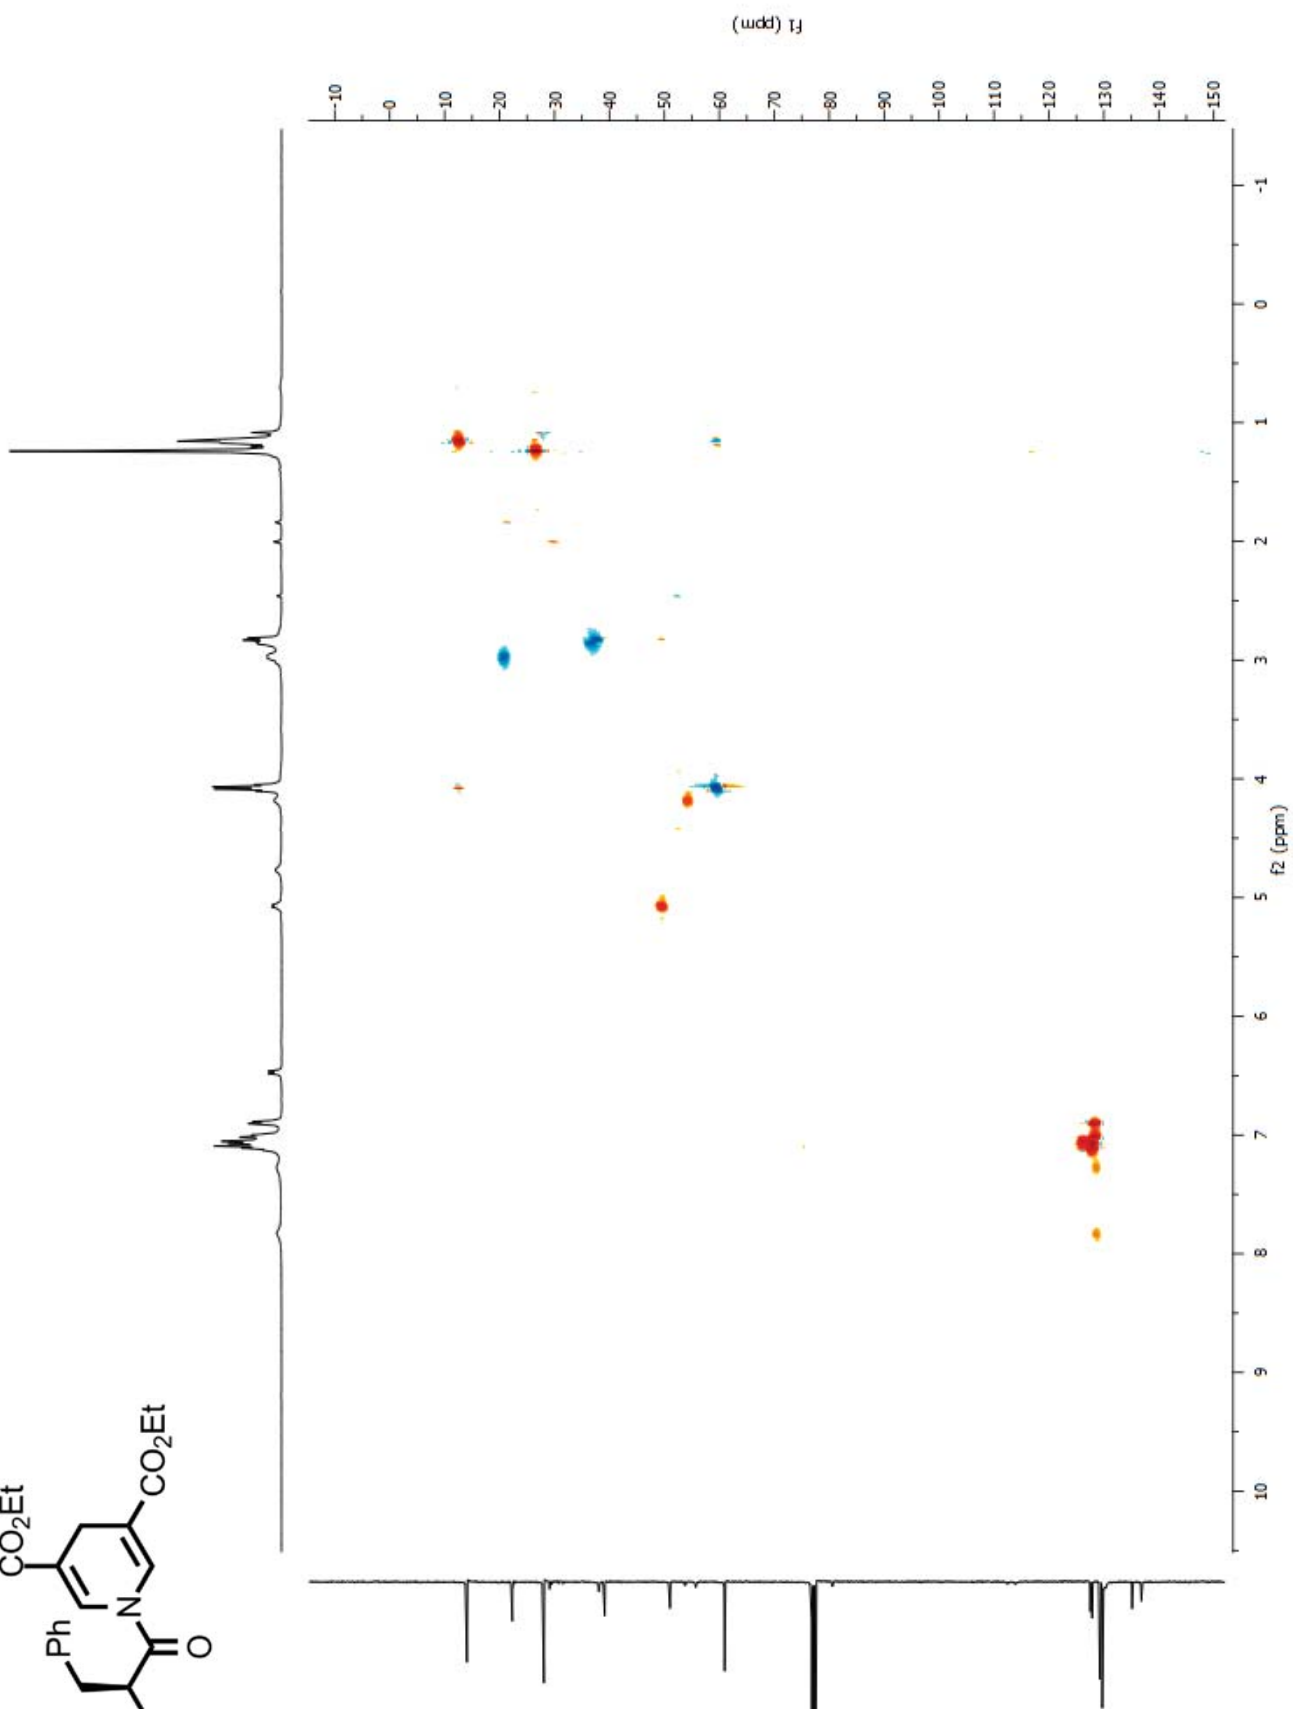

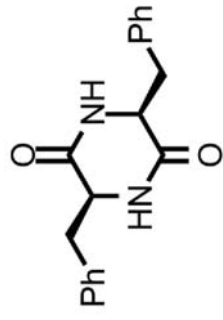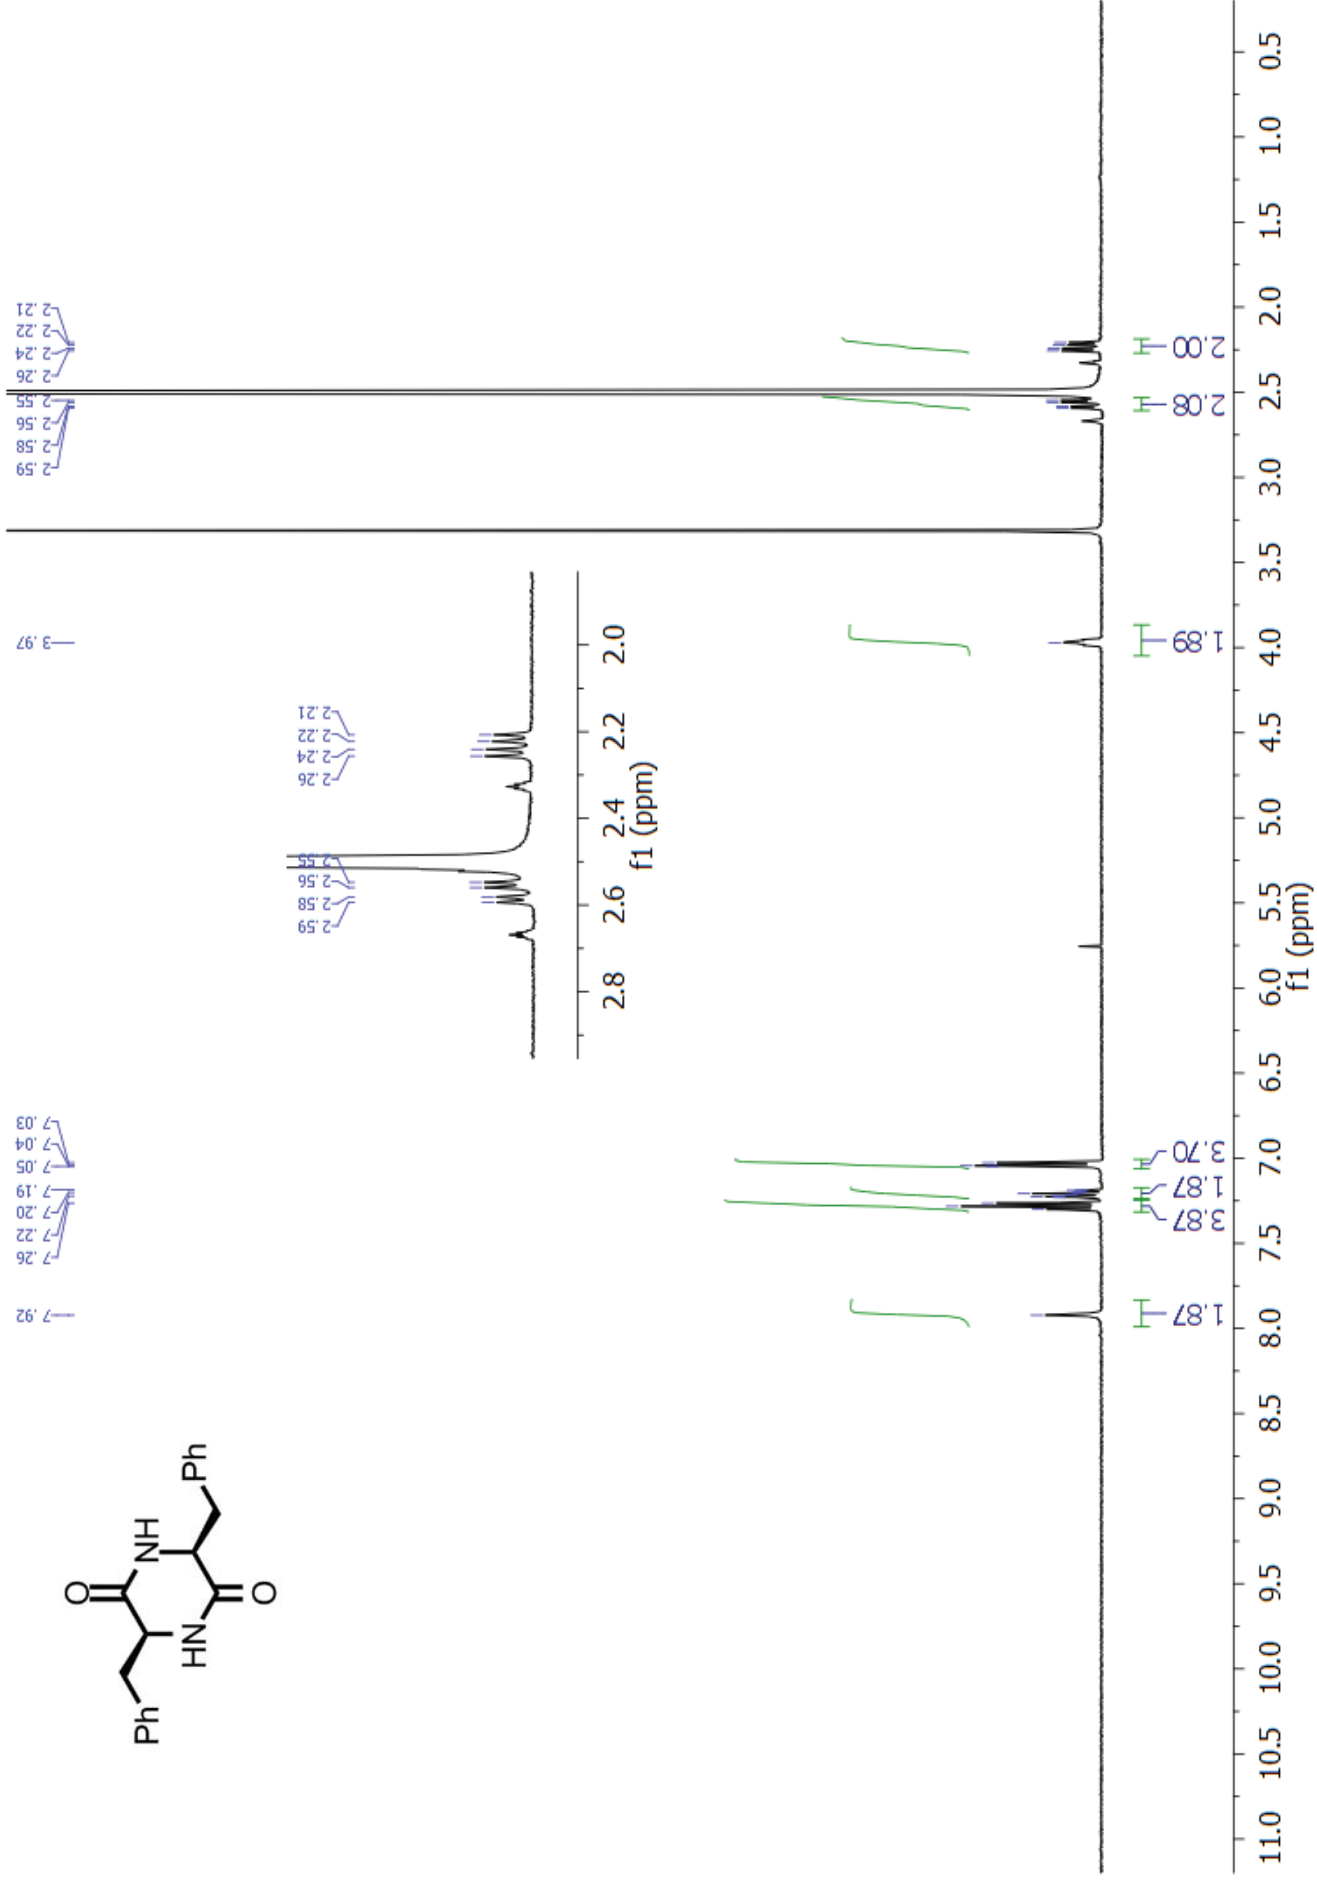

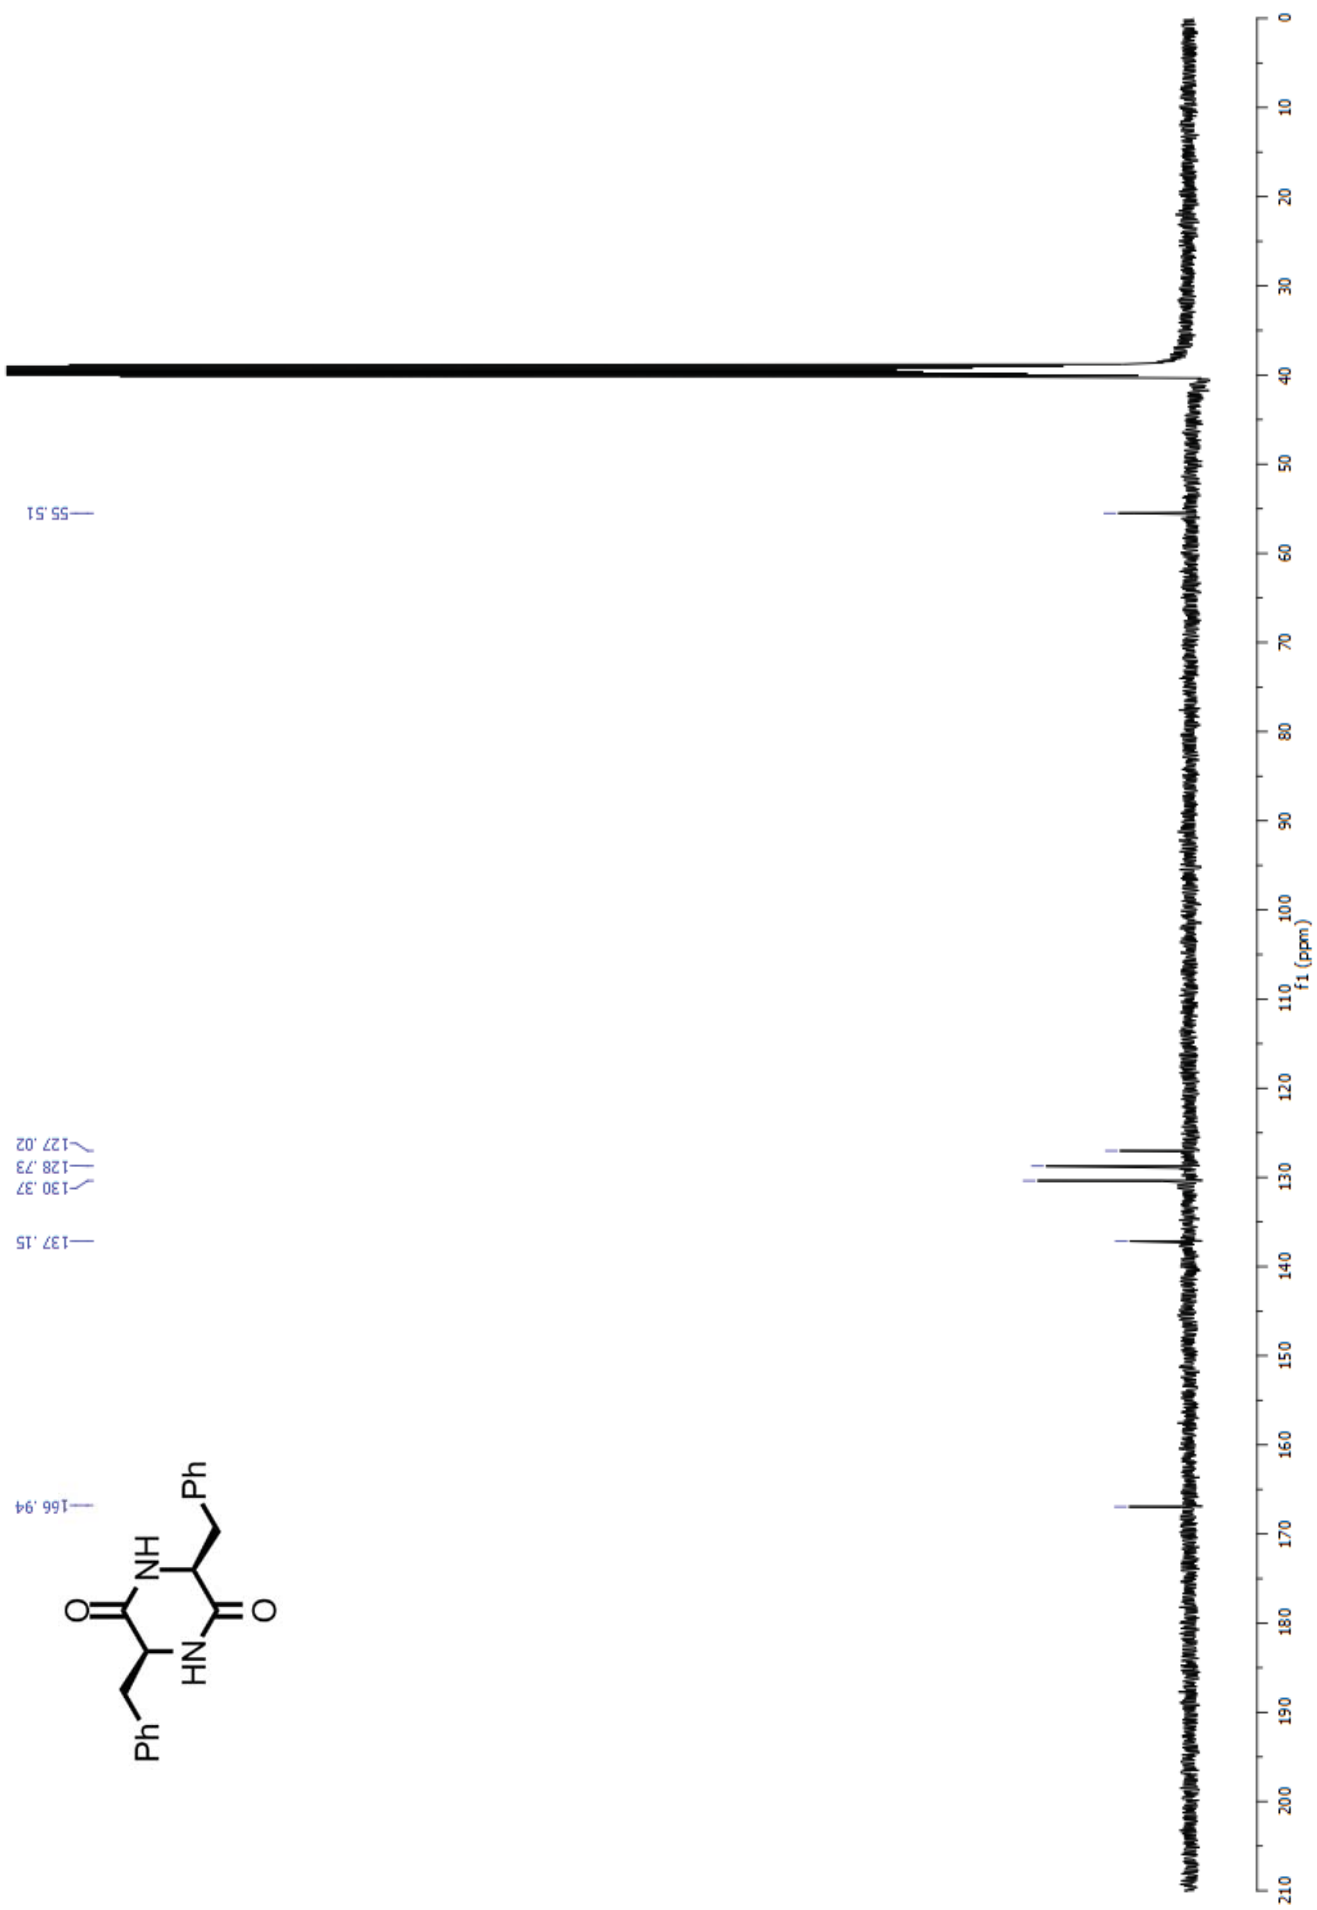

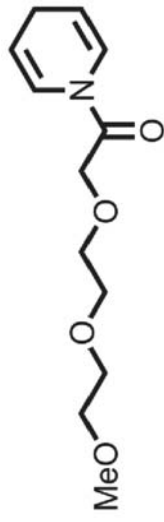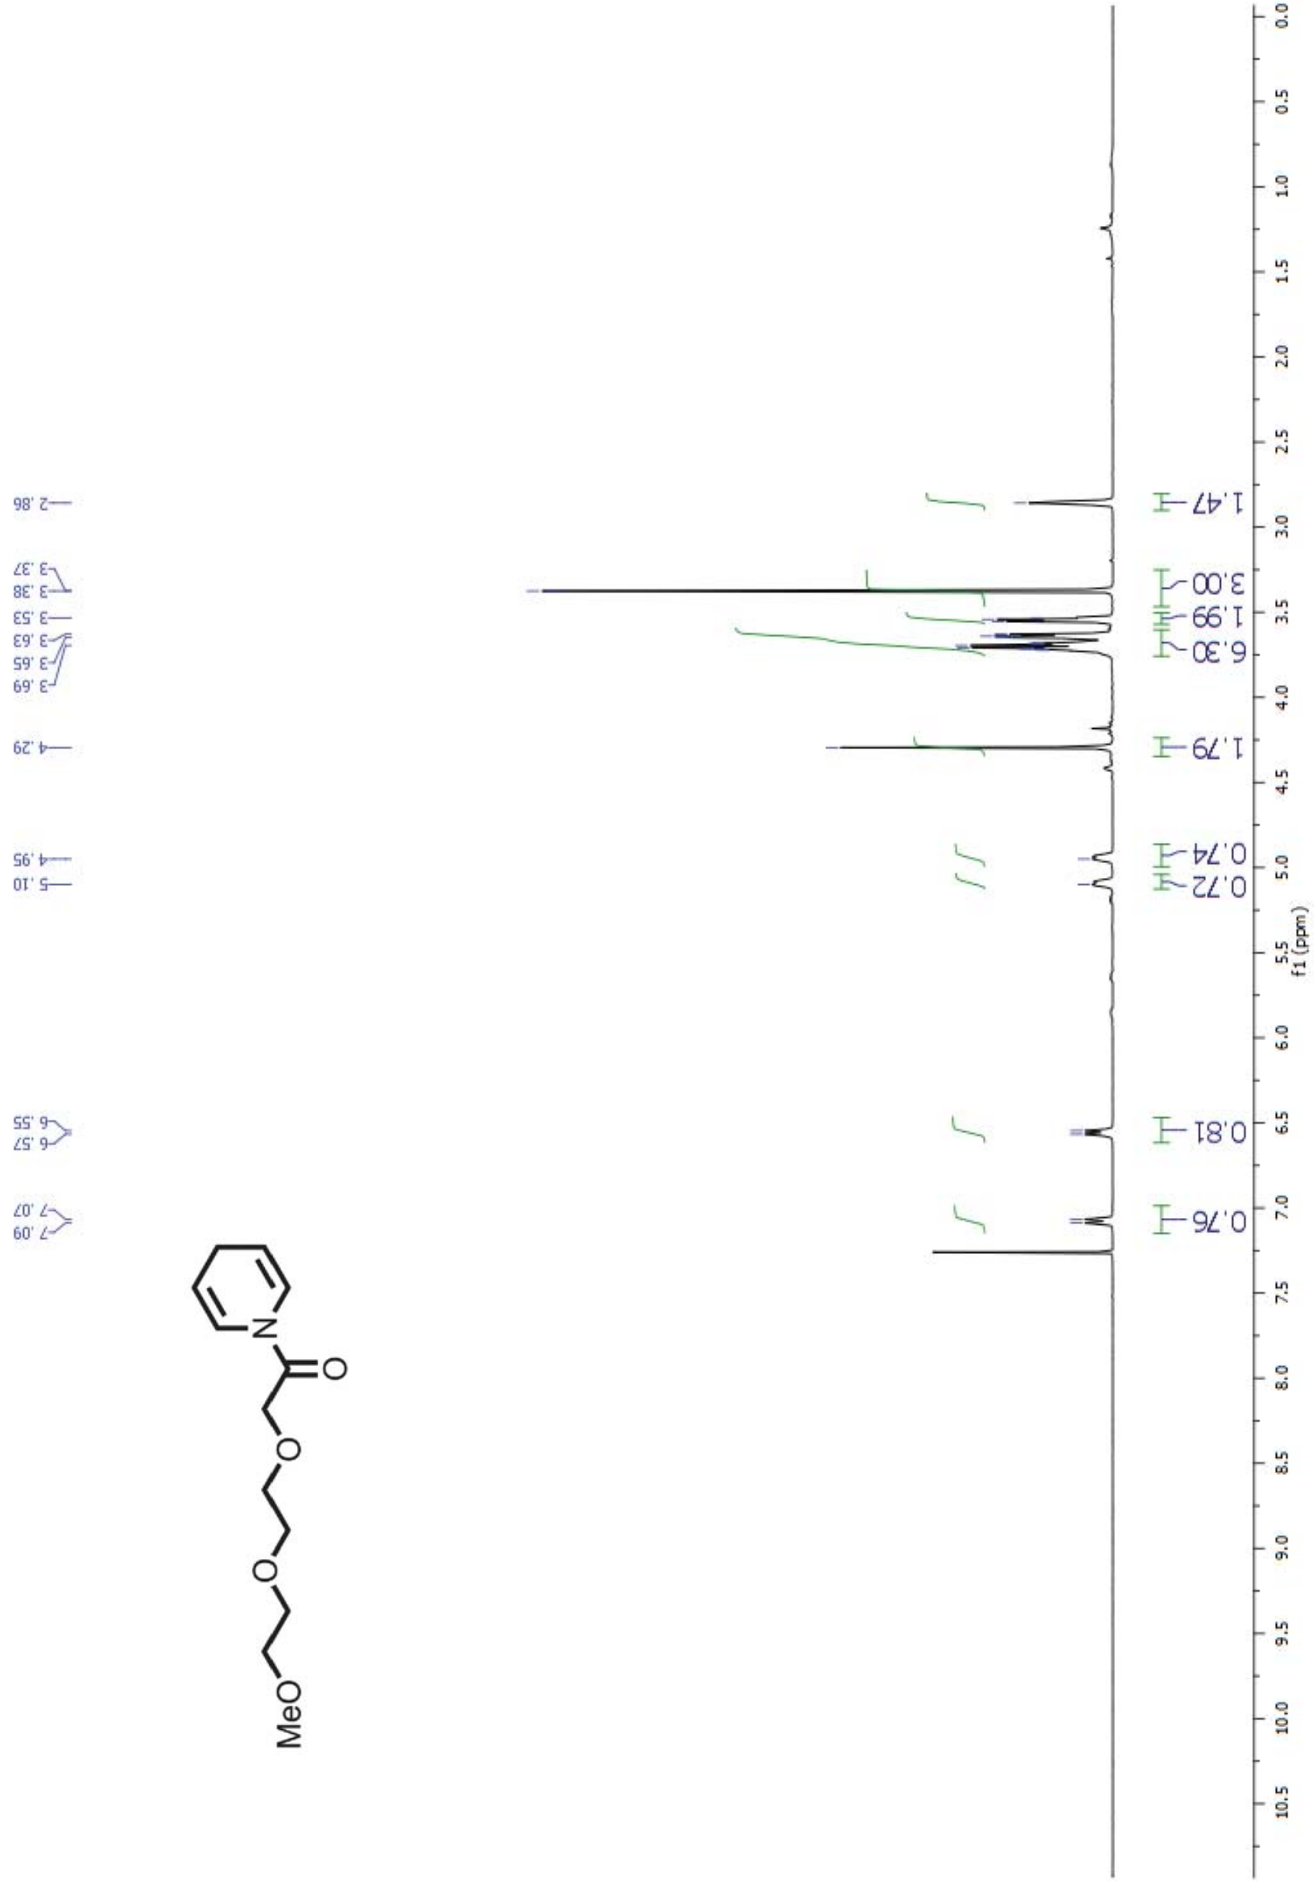

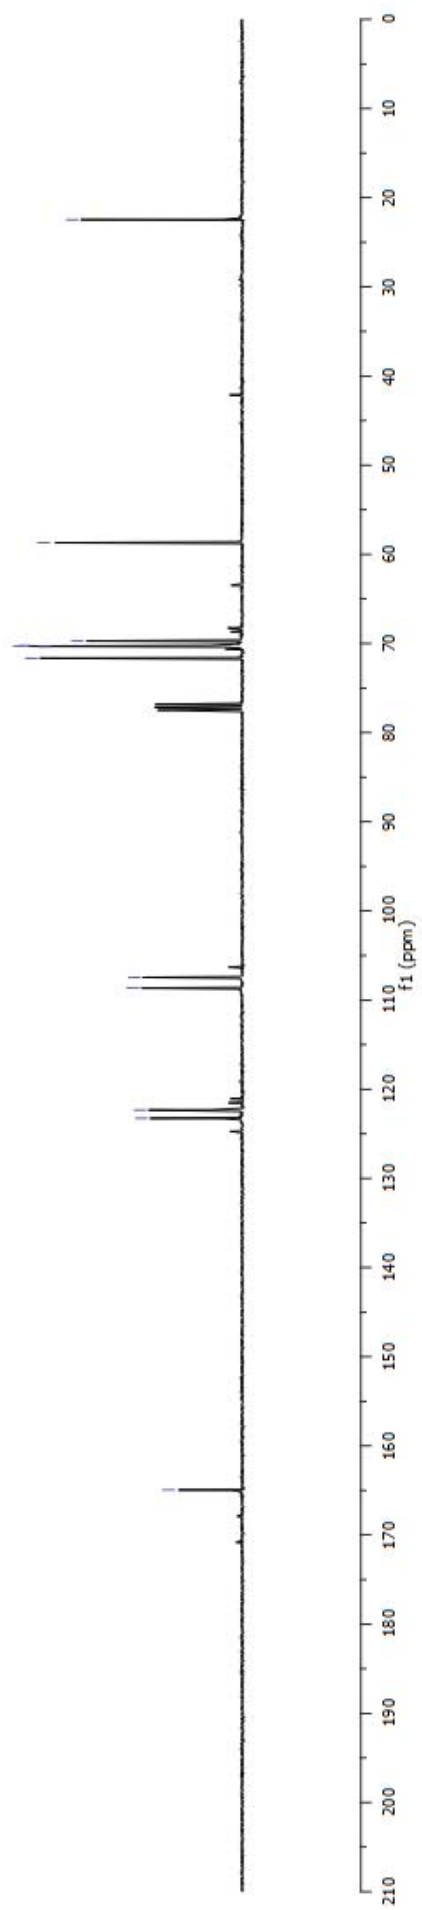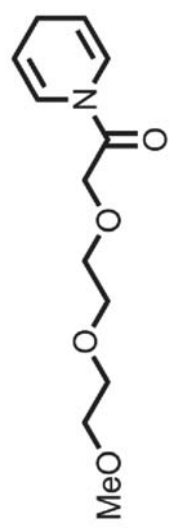

22.47

58.71

69.72  
70.23  
70.30  
70.36  
71.64

107.45  
108.65

122.33  
123.26

164.94

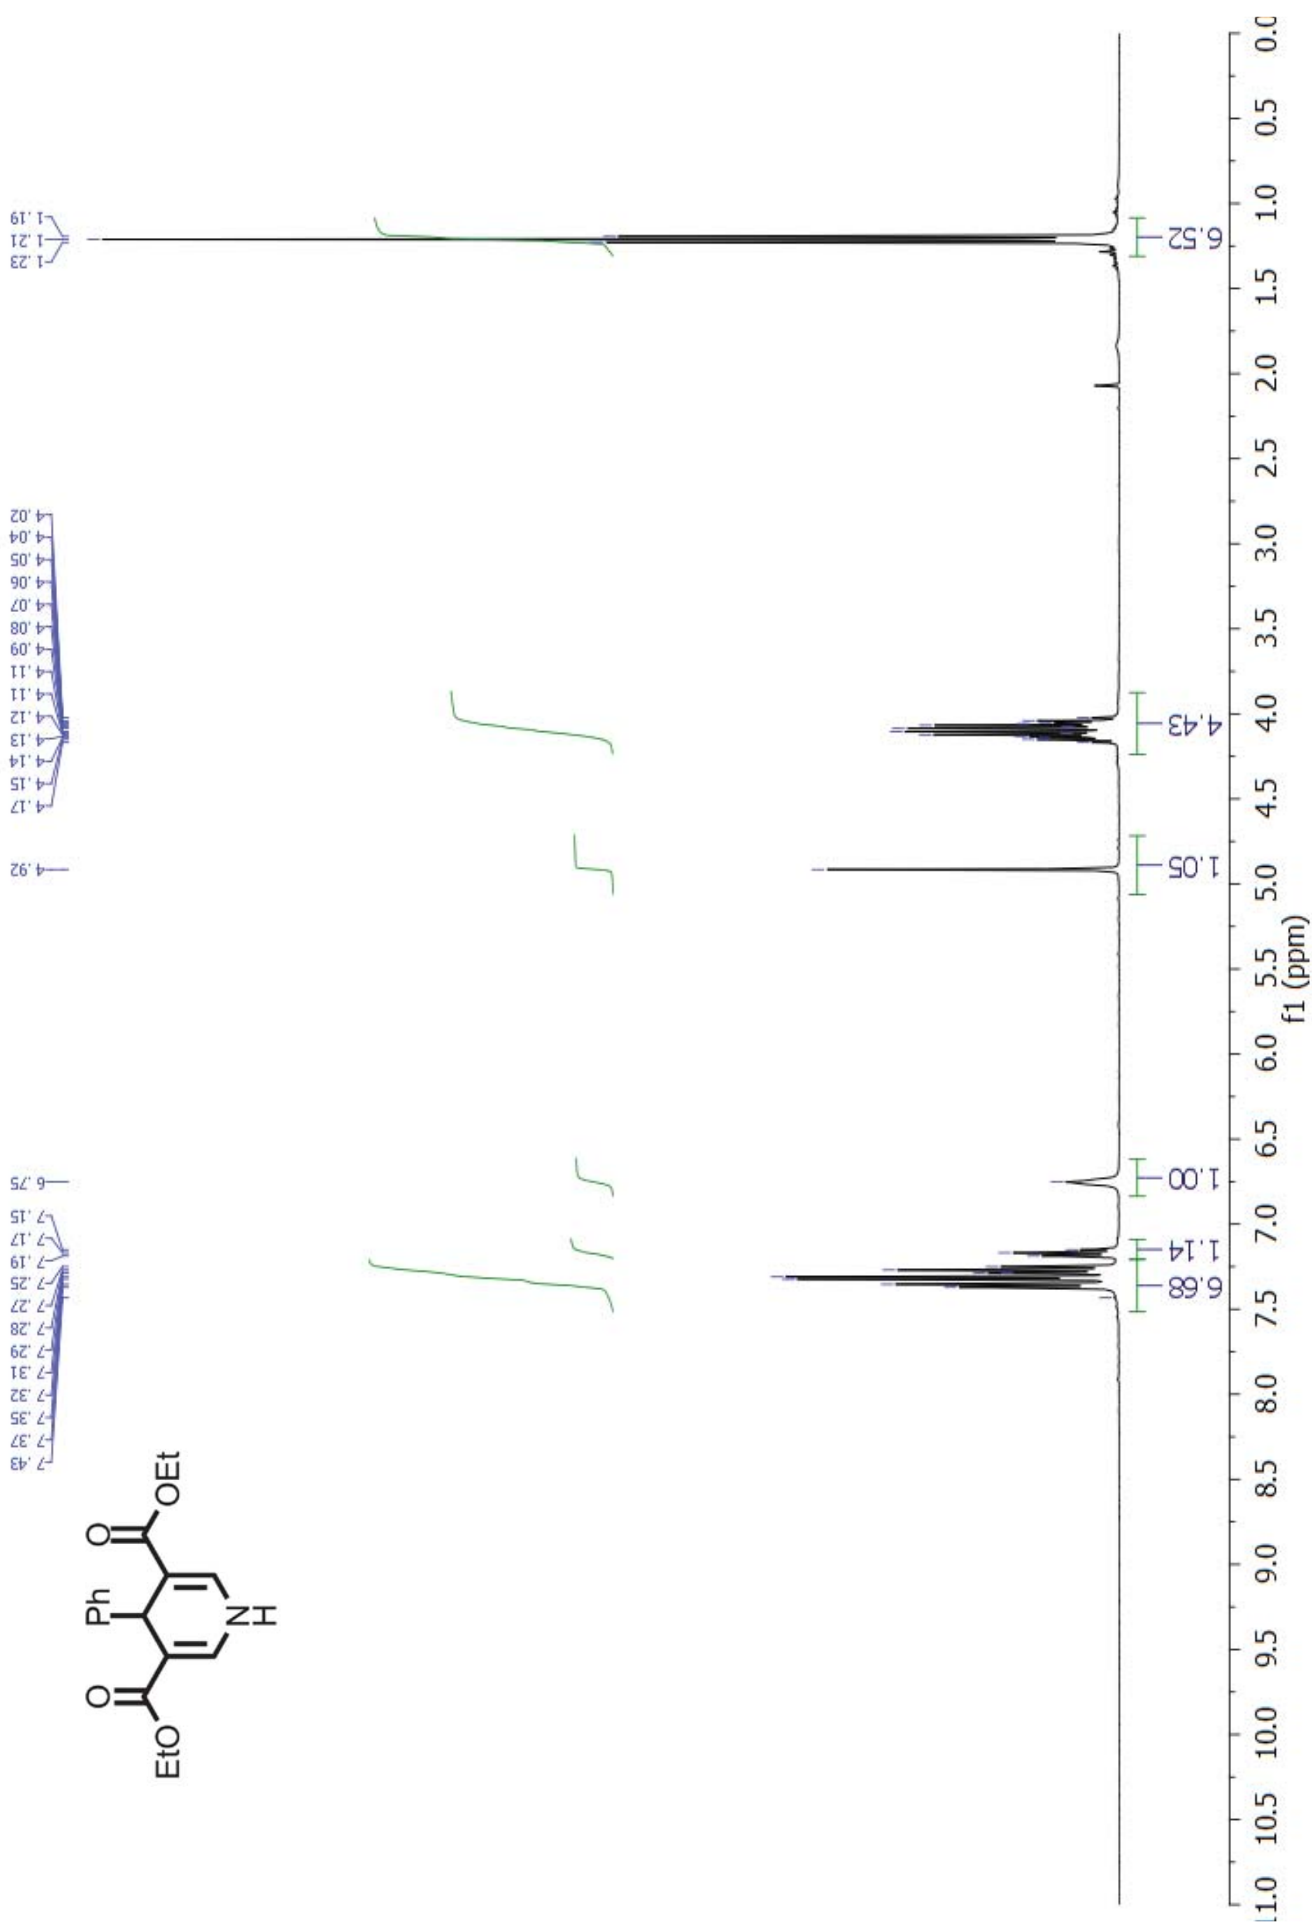

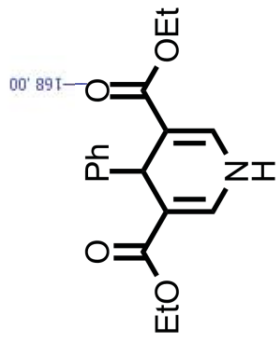

168.00

147.53

134.60

128.57  
128.29  
126.72

108.05

59.93

37.40

13.80

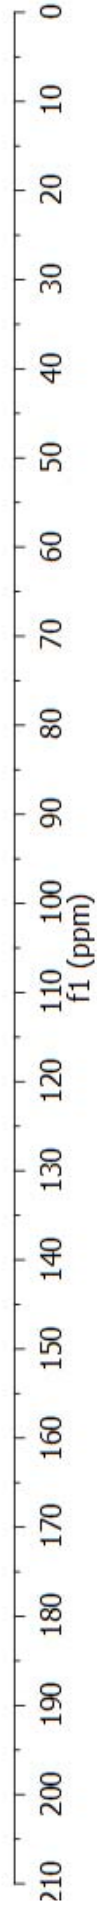

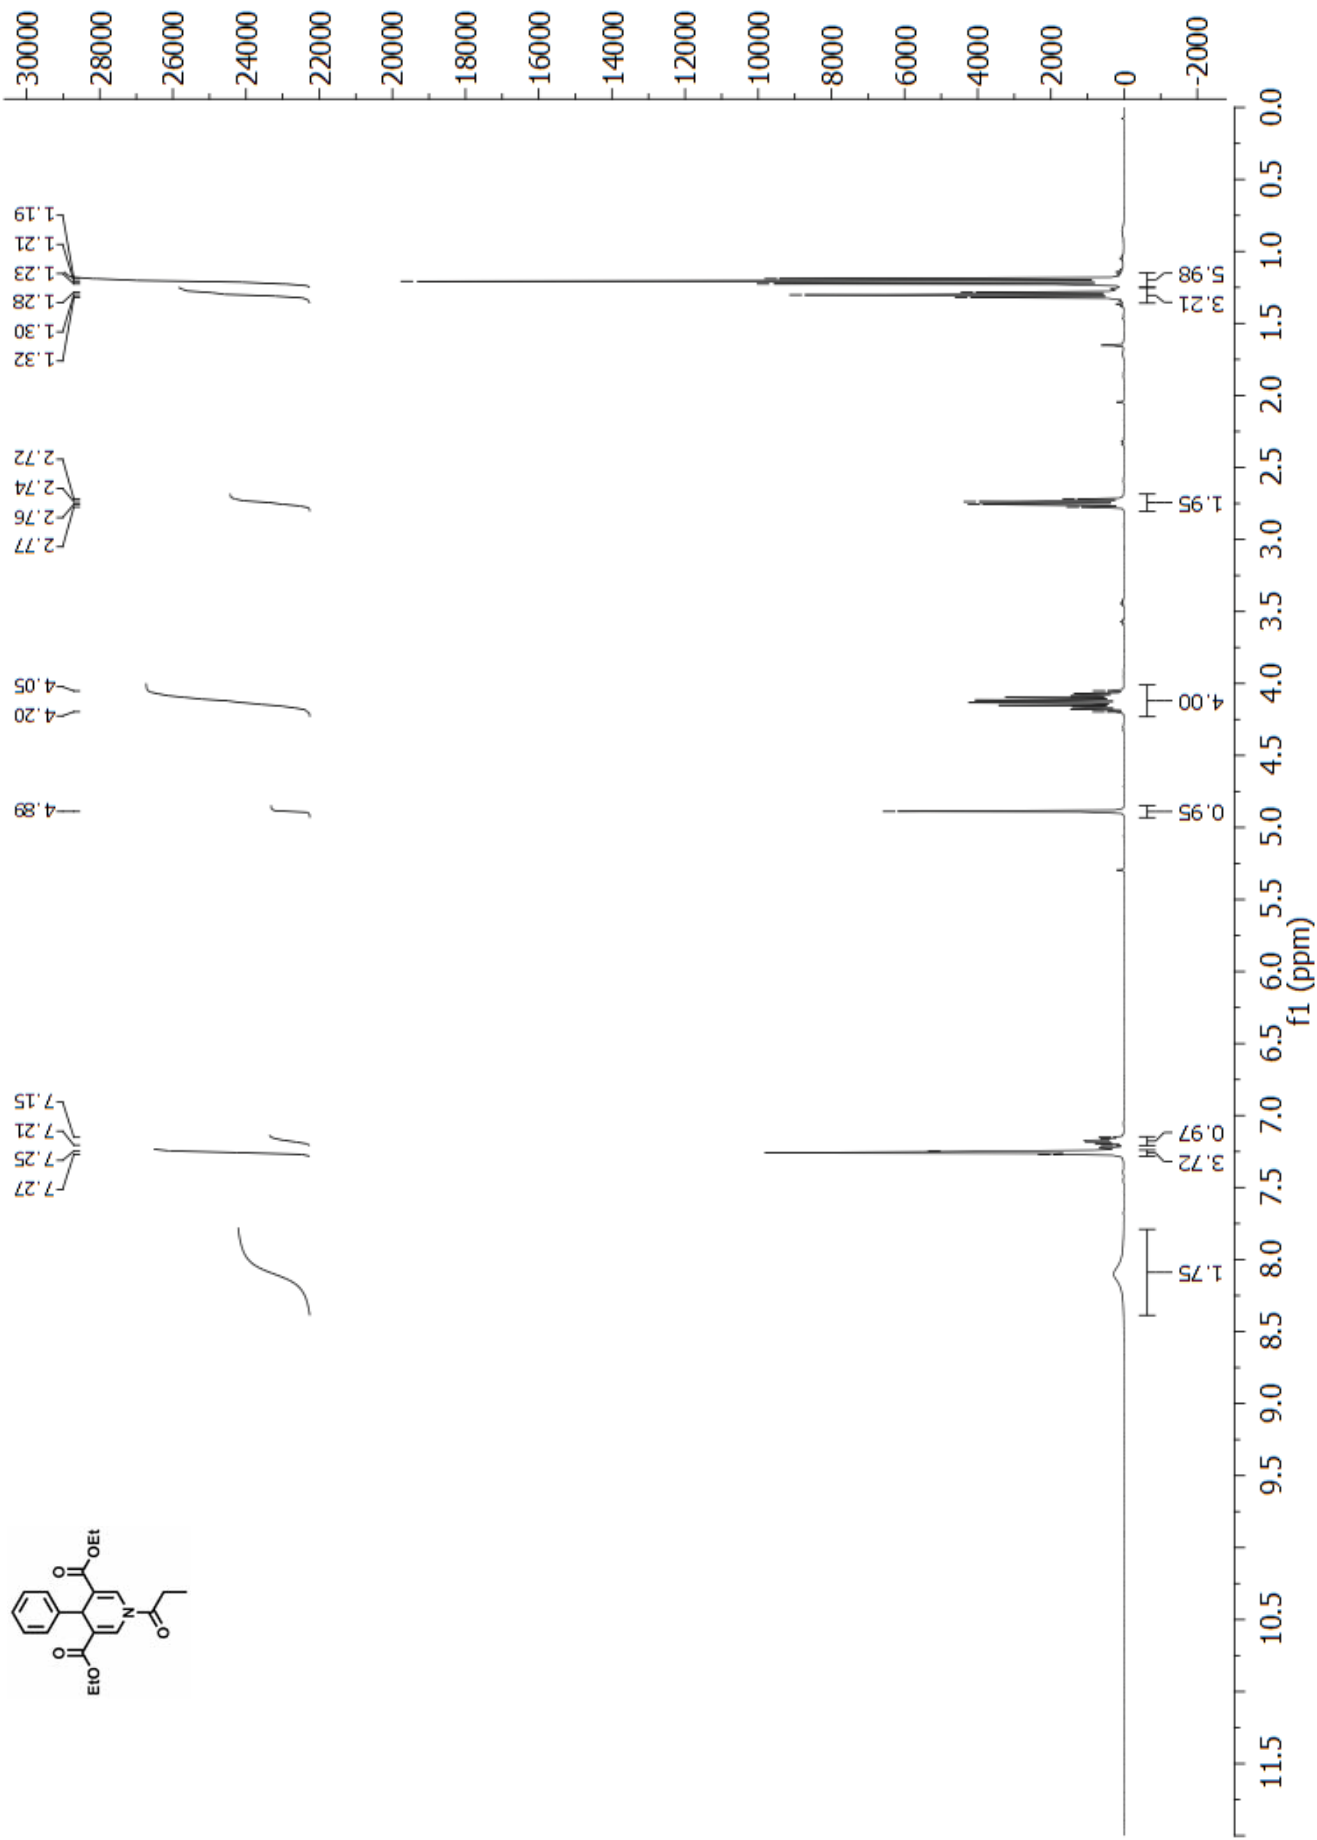

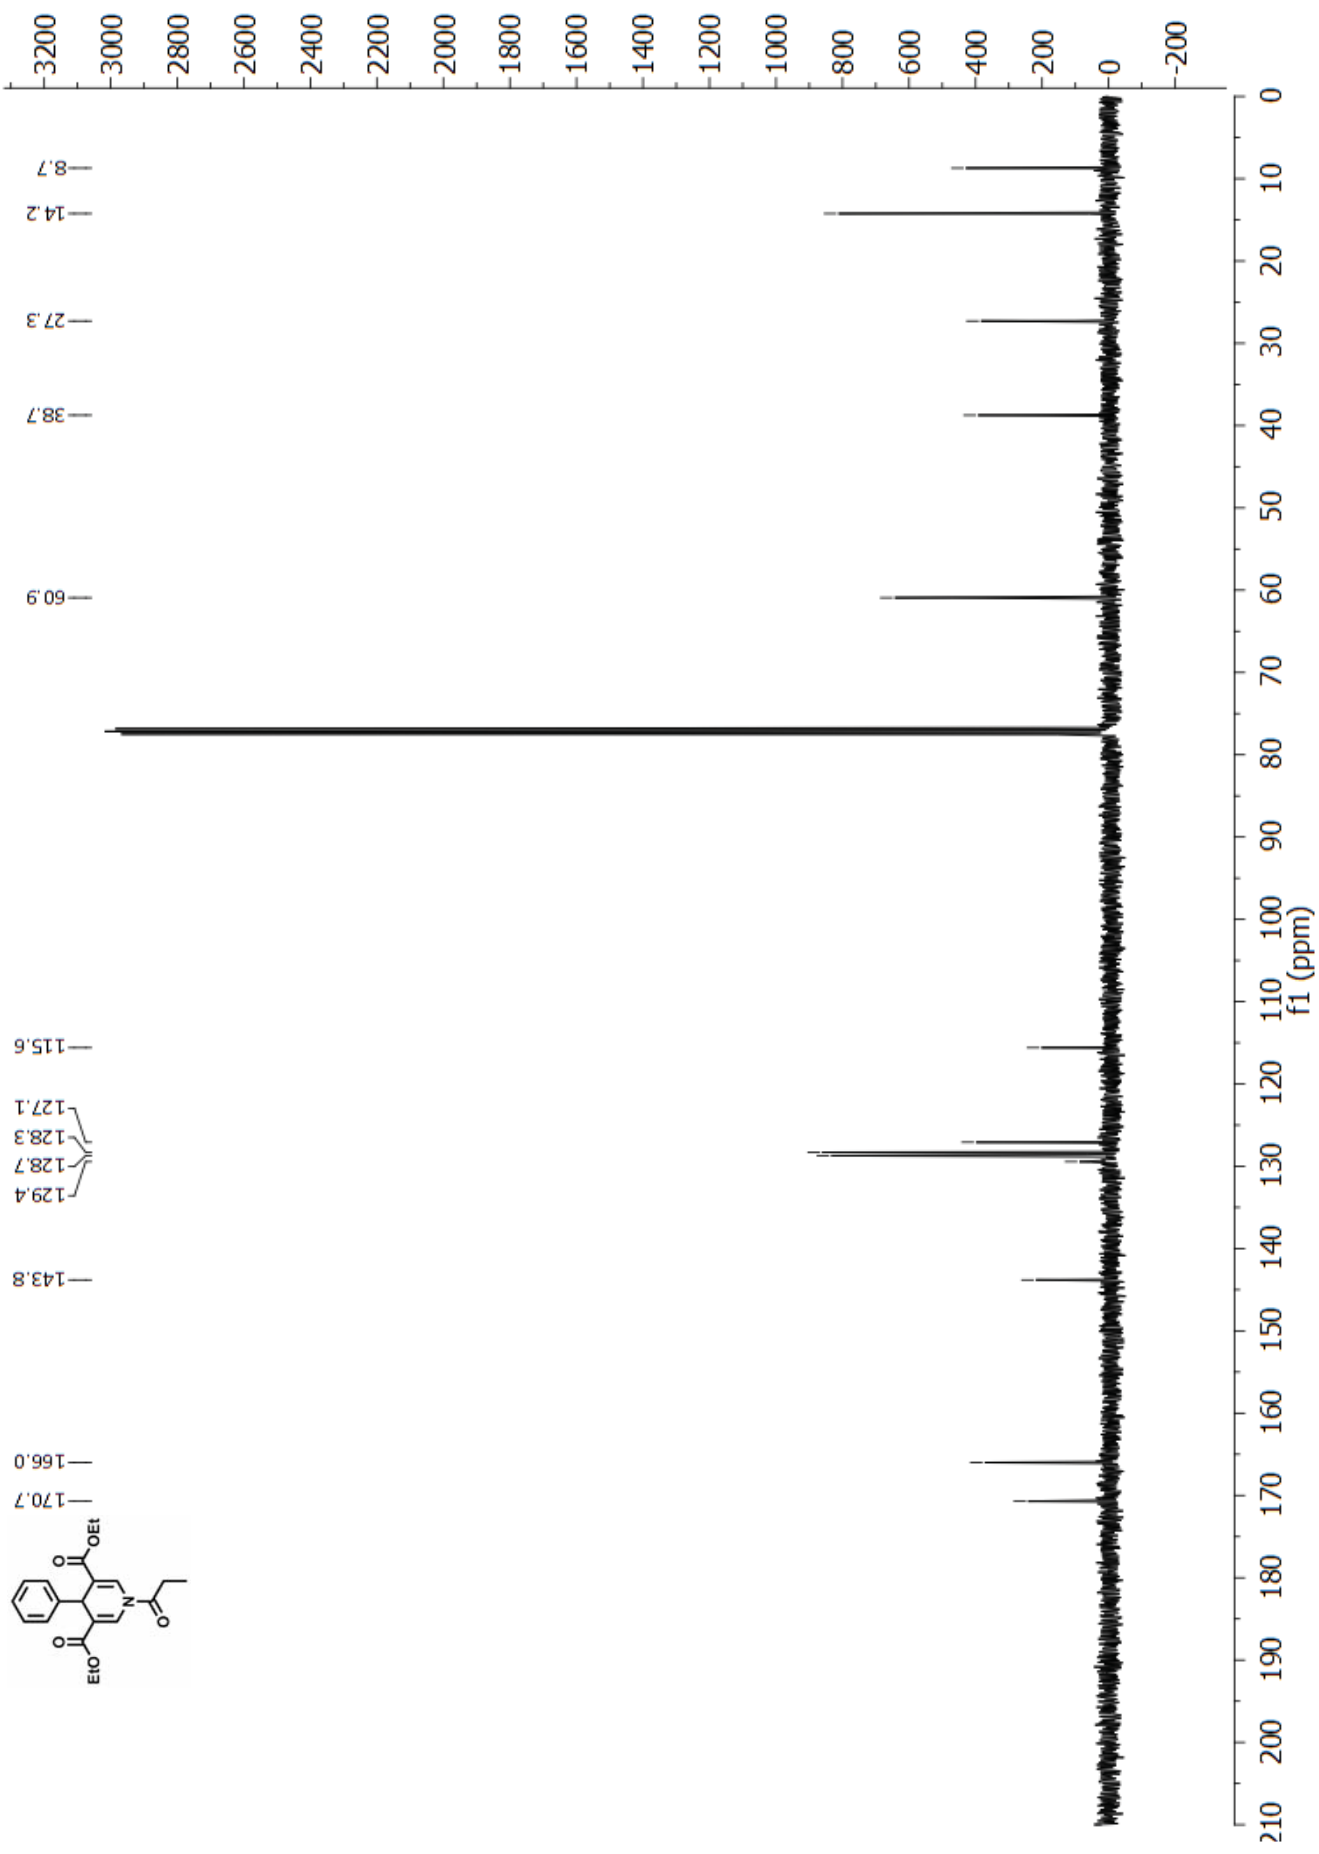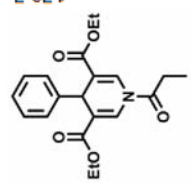

Supplement: c4ob01931h1.pdf [file c4ob01931h1.pdf]
